# Supplementary material for: Stereoselective Synthesis and Catalytical Application of Perillaldehyde-Based 3-Amino-1,2-diol Regioisomers
Source: MDPI journal article supplement (doi:10.3390/ijms25084325), 2024-04-13
Supplement: s1 [file s1]

**Supporting information**  
**for**  
**Stereoselective synthesis and catalytical application of peril-**  
**laldehyde-based 3-amino-1,2-diol regioisomers**

**Márton Háznagy <sup>1,2</sup>, Antal Csámpai <sup>3</sup>, Imre Ugrai <sup>2</sup>, Barnabás Molnár <sup>4</sup>, Matti Haukka <sup>5</sup> and Zsolt Szakonyi <sup>2,\*</sup>**

<sup>1</sup> Institute of Pharmacognosy, University of Szeged, H-6720 Szeged, Hungary;  
haznagy.marton.benedek@szte.hu

<sup>2</sup> Institute of Pharmaceutical Chemistry, University of Szeged, Interdisciplinary Excellence Center, H-6720 Szeged, Eötvös utca 6, Hungary; szakonyi.zsolt@szte.hu for Z.S.; ugrai.imre@gmail.com for I.U.

<sup>3</sup> Institute of Chemistry, Eötvös Loránd University, P.O. Box 32, H-1518 Budapest – 112, Hungary; antal.csampai@ttk.elte.hu

<sup>4</sup> Department of Molecular and Analytical Chemistry, Interdisciplinary Excellence Centre, University of Szeged, Dóm Tér 7-8, H-6720 Szeged, Hungary; barnabas.molnar@chem.u-szeged.hu

<sup>5</sup> Department of Chemistry, University of Jyväskylä, POB 35, 40351 Jyväskylä, Finland;  
matti.o.haukka@jyu.fi

\* Correspondence: szakonyi.zsolt@szte.hu; Tel.: +36-62-546809

## Contents

### X-Ray structure determination of **7a**

|                                                                                    |                    |
|------------------------------------------------------------------------------------|--------------------|
| <sup>1</sup> H-, <sup>13</sup> C- NMR, and 2D NMR spectra of compound <b>3a</b>    | Figure S1 – S3     |
| <sup>1</sup> H-, <sup>13</sup> C- NMR, and 2D NMR spectra of compound <b>3b</b>    | Figure S4 – S8     |
| <sup>1</sup> H-, <sup>13</sup> C- NMR, and 2D NMR spectra of compound <b>3c</b>    | Figure S9 – S13    |
| <sup>1</sup> H-, <sup>13</sup> C- NMR spectra of compound <b>4a</b>                | Figure S14 – S15   |
| <sup>1</sup> H-, <sup>13</sup> C- NMR spectra of compound <b>4b</b>                | Figure S16 – S20   |
| <sup>1</sup> H-, <sup>13</sup> C- NMR, and 2D NMR spectra of compound <b>4c</b>    | Figure S21 – S25   |
| <sup>1</sup> H-, <sup>13</sup> C- NMR spectra of compound <b>5a</b>                | Figure S26 – S27   |
| <sup>1</sup> H-, <sup>13</sup> C- NMR spectra of compound <b>6a</b>                | Figure S28 – S29   |
| <sup>1</sup> H-, <sup>13</sup> C- NMR spectra of compound <b>5b</b>                | Figure S30 – S31   |
| <sup>1</sup> H-, <sup>13</sup> C- NMR spectra of compound <b>6b</b>                | Figure S32 – S33   |
| <sup>1</sup> H-, <sup>13</sup> C- NMR spectra of compound <b>5c</b>                | Figure S34 – S35   |
| <sup>1</sup> H-, <sup>13</sup> C- NMR, and 2D NMR spectra of compound <b>6c</b>    | Figure S36 – S39   |
| <sup>1</sup> H-, <sup>13</sup> C- NMR, and 2D NMR spectra of compound <b>7a</b>    | Figure S40 – S44   |
| <sup>1</sup> H-, <sup>13</sup> C- NMR spectra of compound <b>7b</b>                | Figure S45 – S46   |
| <sup>1</sup> H-, <sup>13</sup> C- NMR spectra of compound <b>7c</b>                | Figure S47 – S48   |
| <sup>1</sup> H-, <sup>13</sup> C- NMR, and 2D NMR spectra of compound <b>11a</b>   | Figure S49 – S54   |
| <sup>1</sup> H-, <sup>13</sup> C- NMR, and 2D NMR spectra of compound <b>11b</b>   | Figure S55 – S59   |
| <sup>1</sup> H-, <sup>13</sup> C- NMR spectra of compound <b>11c</b>               | Figure S60 – S61   |
| <sup>1</sup> H-, <sup>13</sup> C- NMR, and 2D NMR spectra of compound <b>8</b>     | Figure S62 – S66   |
| <sup>1</sup> H-, <sup>13</sup> C- NMR, and 2D NMR spectra of compound <b>12</b>    | Figure S67 – S71   |
| <sup>1</sup> H-, <sup>13</sup> C- NMR spectra of compound <b>9</b>                 | Figure S72 – S73   |
| <sup>1</sup> H-, <sup>13</sup> C- NMR spectra of compound <b>13</b>                | Figure S74 – S75   |
| <sup>1</sup> H-, <sup>13</sup> C- NMR, and 2D NMR spectra of compound <b>10a</b>   | Figure S76 – S81   |
| <sup>1</sup> H-, <sup>13</sup> C- NMR, and 2D NMR spectra of compound <b>10b</b>   | Figure S82 – S86   |
| <sup>1</sup> H-, <sup>13</sup> C- NMR, and 2D NMR spectra of compound <b>10c</b>   | Figure S87 – S91   |
| <sup>1</sup> H-, <sup>13</sup> C- NMR spectra of compound <b>16a-b</b>             | Figure S92 – S93   |
| <sup>1</sup> H-, <sup>13</sup> C- NMR spectra of compound <b>18a-b</b>             | Figure S94 – S95   |
| <sup>1</sup> H-, <sup>13</sup> C- NMR, and 2D NMR spectra of compound <b>19a</b>   | Figure S96 – S99   |
| <sup>1</sup> H-, <sup>13</sup> C- NMR, and 2D NMR spectra of compound <b>19b-c</b> | Figure S100 – S102 |
| <sup>1</sup> H-, <sup>13</sup> C- NMR, and 2D NMR spectra of compound <b>20b</b>   | Figure S103 – S106 |
| <sup>1</sup> H-, <sup>13</sup> C- NMR, and 2D NMR spectra of compound <b>20c</b>   | Figure S107 – S110 |
| <sup>1</sup> H-, <sup>13</sup> C- NMR and NOESY spectra of compound <b>21a</b>     | Figure S111 – S113 |
| <sup>1</sup> H-, <sup>13</sup> C- NMR, and NOESY spectra of compound <b>21b</b>    | Figure S114 – S116 |
| <sup>1</sup> H-, <sup>13</sup> C- NMR, and NOESY spectra of compound <b>21c</b>    | Figure S117 – S119 |
| <sup>1</sup> H-, <sup>13</sup> C- NMR, and 2D NMR spectra of compound <b>23a</b>   | Figure S120 – S124 |

|                                                                                            |                    |
|--------------------------------------------------------------------------------------------|--------------------|
| $^1\text{H}$ -, $^{13}\text{C}$ - NMR, and 2D NMR spectra of compound <b>23b</b>           | Figure S125 – S130 |
| $^1\text{H}$ -, $^{13}\text{C}$ - NMR, and 2D NMR spectra of compound <b>22</b>            | Figure S131 – S134 |
| $^1\text{H}$ -, $^{13}\text{C}$ - NMR, and 2D NMR spectra of compound <b>25a</b>           | Figure S135 – S138 |
| $^1\text{H}$ -, $^{13}\text{C}$ - NMR spectra of compound <b>25b</b>                       | Figure S139 – S140 |
| $^1\text{H}$ -, $^{13}\text{C}$ - NMR, and 2D NMR spectra of compound <b>24</b>            | Figure S141 – S144 |
| Chiral GC determination of the ratio of <b>16a</b> and <b>16b</b>                          | Figure S145        |
| Chiral GC determination of the ratio of <b>18a</b> and <b>18b</b>                          | Figure S146        |
| Representative GC chromatograms of $\text{Et}_2\text{Zn}$ /benzaldehyde model reactions    | Figure S147 – S156 |
| HPLC chromatograms of the $\text{Et}_2\text{Zn}$ / <i>p</i> -tolylaldehyde reactions       | Figure S157 – S158 |
| HPLC chromatograms of the $\text{Et}_2\text{Zn}$ / <i>p</i> -methoxybenzaldehyde reactions | Figure S159 – S160 |
| HPLC chromatograms of the $\text{Et}_2\text{Zn}$ / <i>m</i> -methoxybenzaldehyde reactions | Figure S161 – S162 |

## X-Ray structure determination of compound 7a

The crystal of **7a** was immersed in cryo-oil, mounted in a loop, and measured at a temperature of 120 K. The X-ray diffraction data was collected on a Rigaku Oxford Diffraction Supernova diffractometer using Cu K $\alpha$  radiation. The *CrysAlisPro*<sup>1</sup> software package was used for cell refinement and data reduction. An analytical absorption correction (*CrysAlisPro*<sup>1</sup>) was applied to the intensities before the structure solution. The structure was solved in the chiral space group P2<sub>1</sub>P2<sub>1</sub>2 by direct methods (*SHELXS*<sup>2</sup>). Structural refinement was carried out using *SHELXL*<sup>3</sup> software with *SHELXLE*<sup>4</sup> graphical user interface. The NH<sub>2</sub> and OH hydrogen atoms were located from the difference Fourier map and refined isotropically. All other hydrogen atoms were positioned geometrically and constrained to ride on their parent atoms, with C-H = 0.95-1.00 Å and U<sub>iso</sub> = 1.2-1.5·U<sub>eq</sub>(parent atom). The crystallographic details are summarized in Table S1.

Table S1. Crystal Data.

| 7a                                              |                                                   |
|-------------------------------------------------|---------------------------------------------------|
| CCDC                                            |                                                   |
| empirical formula                               | C <sub>17</sub> H <sub>28</sub> ClNO <sub>2</sub> |
| fw                                              | 313.85                                            |
| temp (K)                                        | 120(2)                                            |
| $\lambda$ (Å)                                   | 1.54184                                           |
| cryst syst                                      | Orthorhombic                                      |
| space group                                     | P2 <sub>1</sub> 2 <sub>1</sub> 2                  |
| <i>a</i> (Å)                                    | 29.0568(6)                                        |
| <i>b</i> (Å)                                    | 12.0858(2)                                        |
| <i>c</i> (Å)                                    | 5.04192(7)                                        |
| $\alpha$ (deg)                                  | 90                                                |
| $\beta$ (deg)                                   | 90                                                |
| $\gamma$ (deg)                                  | 90                                                |
| <i>V</i> (Å <sup>3</sup> )                      | 1770.59(6)                                        |
| <i>Z</i>                                        | 4                                                 |
| $\rho_{\text{calc}}$ (Mg/m <sup>3</sup> )       | 1.177                                             |
| $\mu$ (Mo K $\alpha$ ) (mm <sup>-1</sup> )      | 1.936                                             |
| No. reflns.                                     | 24785                                             |
| Unique reflns.                                  | 3752                                              |
| Completeness to $\theta=67.684^\circ$           | 99.9%                                             |
| Absolute structure parameter                    | 0.001(7)                                          |
| GOOF (F <sup>2</sup> )                          | 1.031                                             |
| R <sub>int</sub>                                | 0.0534                                            |
| R1 <sup>a</sup> ( <i>I</i> $\geq$ 2 $\sigma$ )  | 0.0332                                            |
| wR2 <sup>b</sup> ( <i>I</i> $\geq$ 2 $\sigma$ ) | 0.0776                                            |

$$^a R1 = \Sigma ||F_o| - |F_c|| / \Sigma |F_o|, \quad ^b wR2 = \{\Sigma [w(F_o^2 - F_c^2)^2] / \Sigma [w(F_o^2)^2]\}^{1/2}$$

## References

1. Rikagu Oxford Diffraction, *CrysAlisPro* v. 1.171.37.35, 2014, Rikagu Oxford Diffraction inc., Yarnton, Oxfordshire, England.
2. Sheldrick, G. M. *Acta Cryst.* **2015**, A71, 3-8.
3. Sheldrick, G. M. *Acta Cryst.* **2015**, C71, 3-8.
4. Hübschle, C. B.; Sheldrick, G. M.; Dittrich, B. *J. Appl. Cryst.* **2011**, 44, 1281-1284.

**Figure S1:**

**<sup>1</sup>H-NMR of compound (*S*)-*N*-Benzyl-1-(4-Isopropylcyclohex-1-en-1-yl)methanamine hydrochloride **3a****

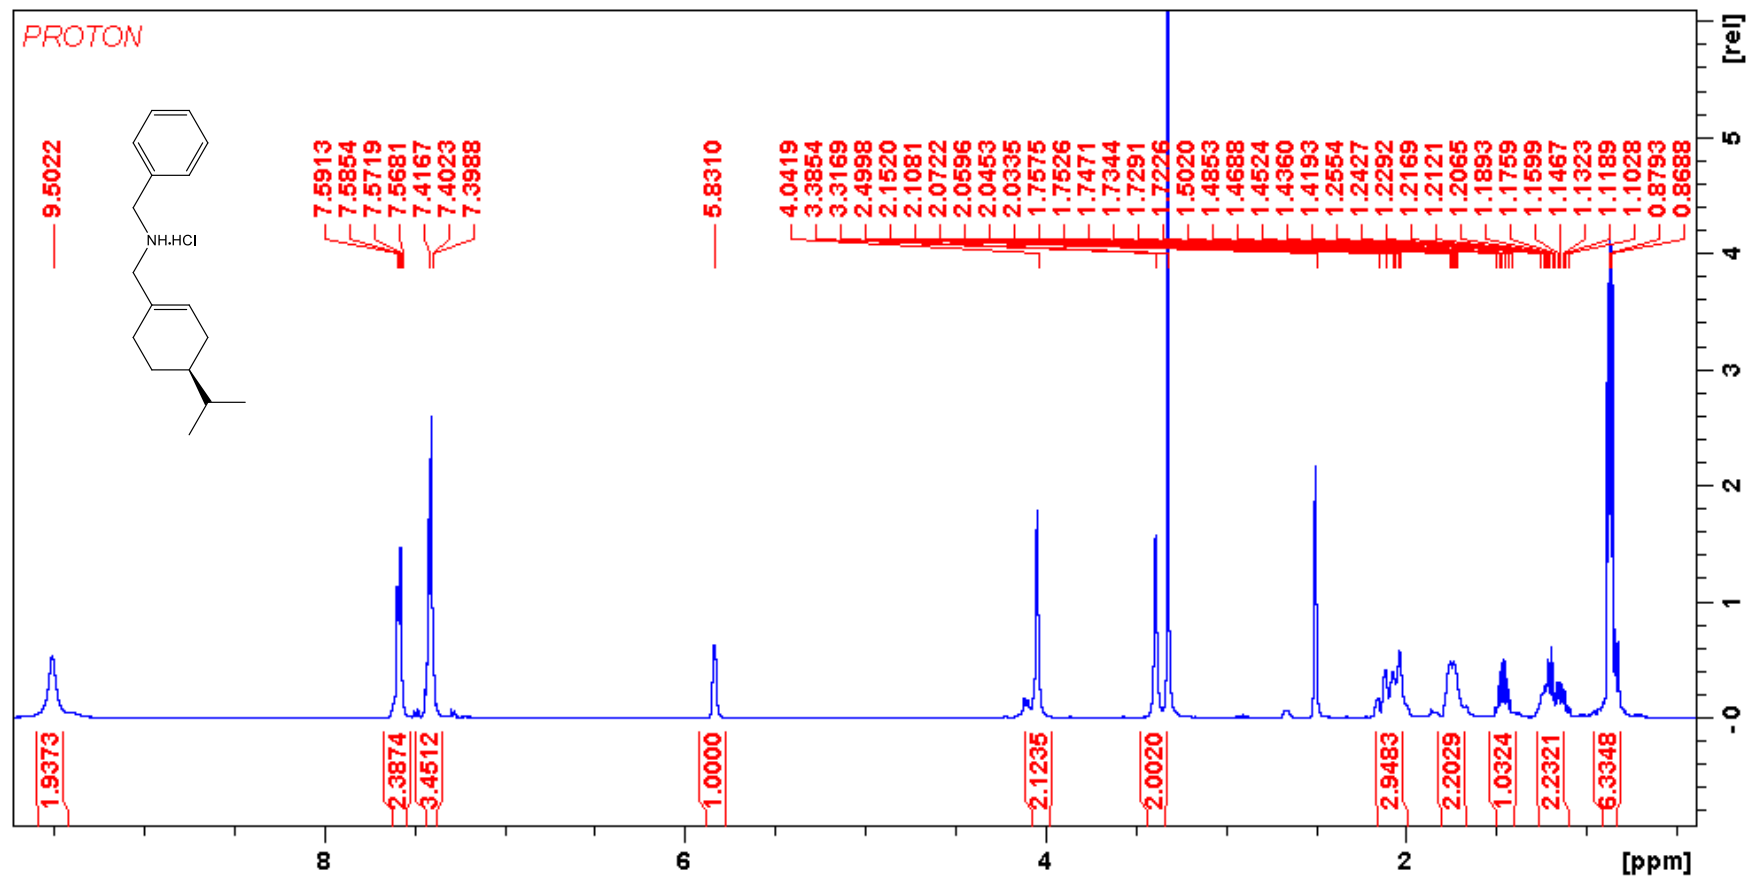

**Figure S2:**

**$^{13}\text{C}$ -NMR of compound (*S*)-*N*-Benzyl-1-(4-Isopropylcyclohex-1-en-1-yl)methanamine hydrochloride **3a****

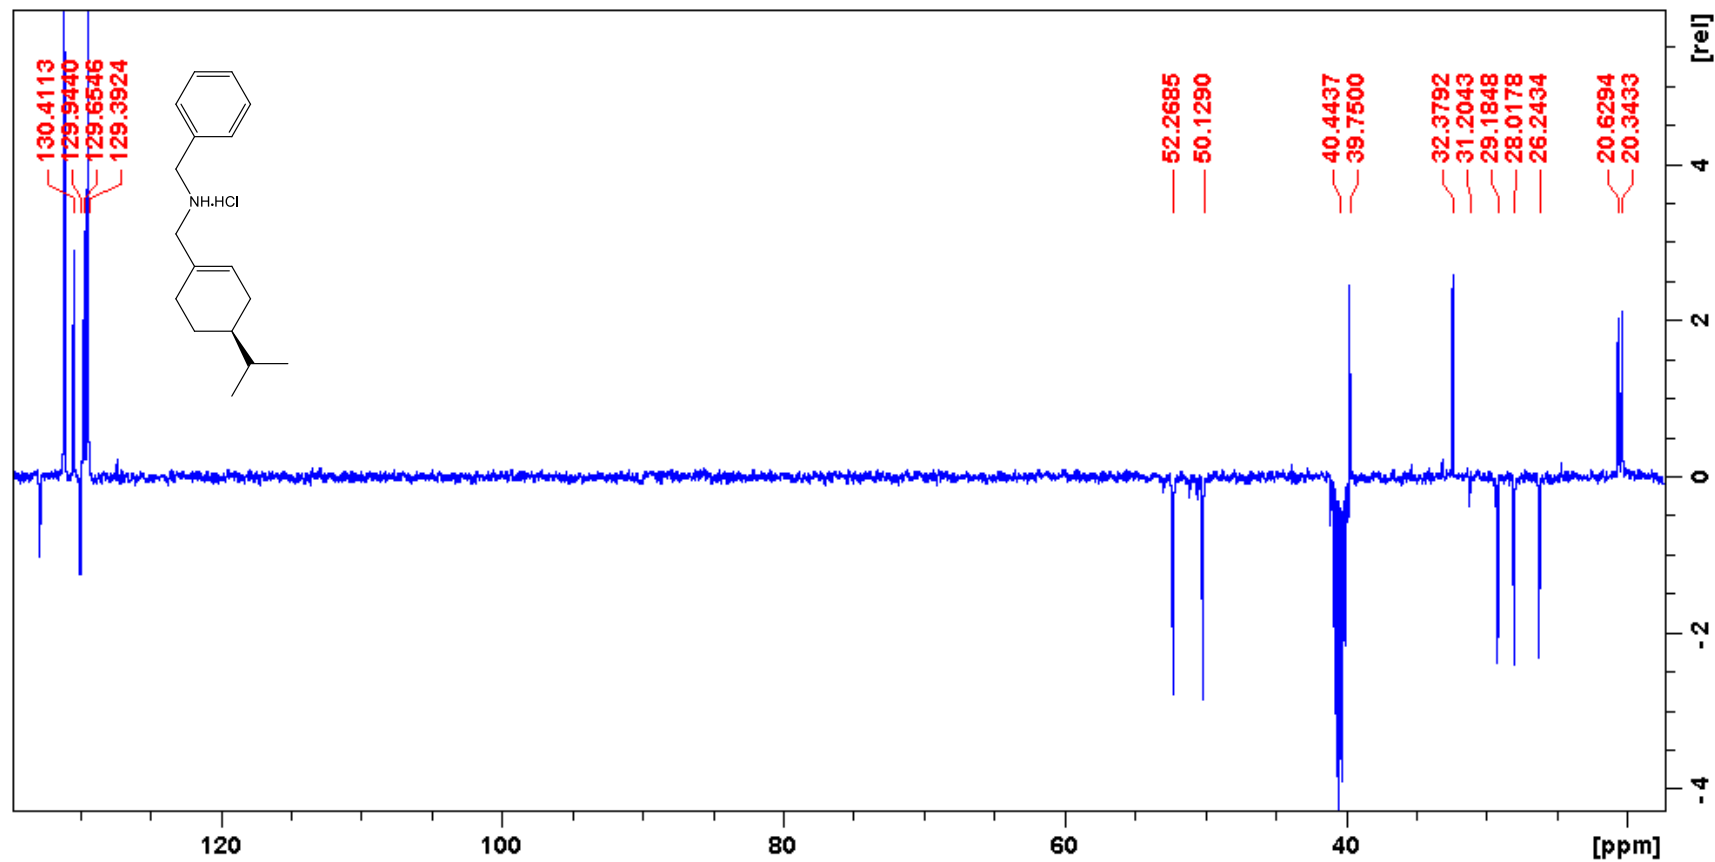

**Figure S3:**

**COSY NMR of compound (*S*)-*N*-Benzyl-1-(4-Isopropylcyclohex-1-en-1-yl)methanamine hydrochloride **3a****

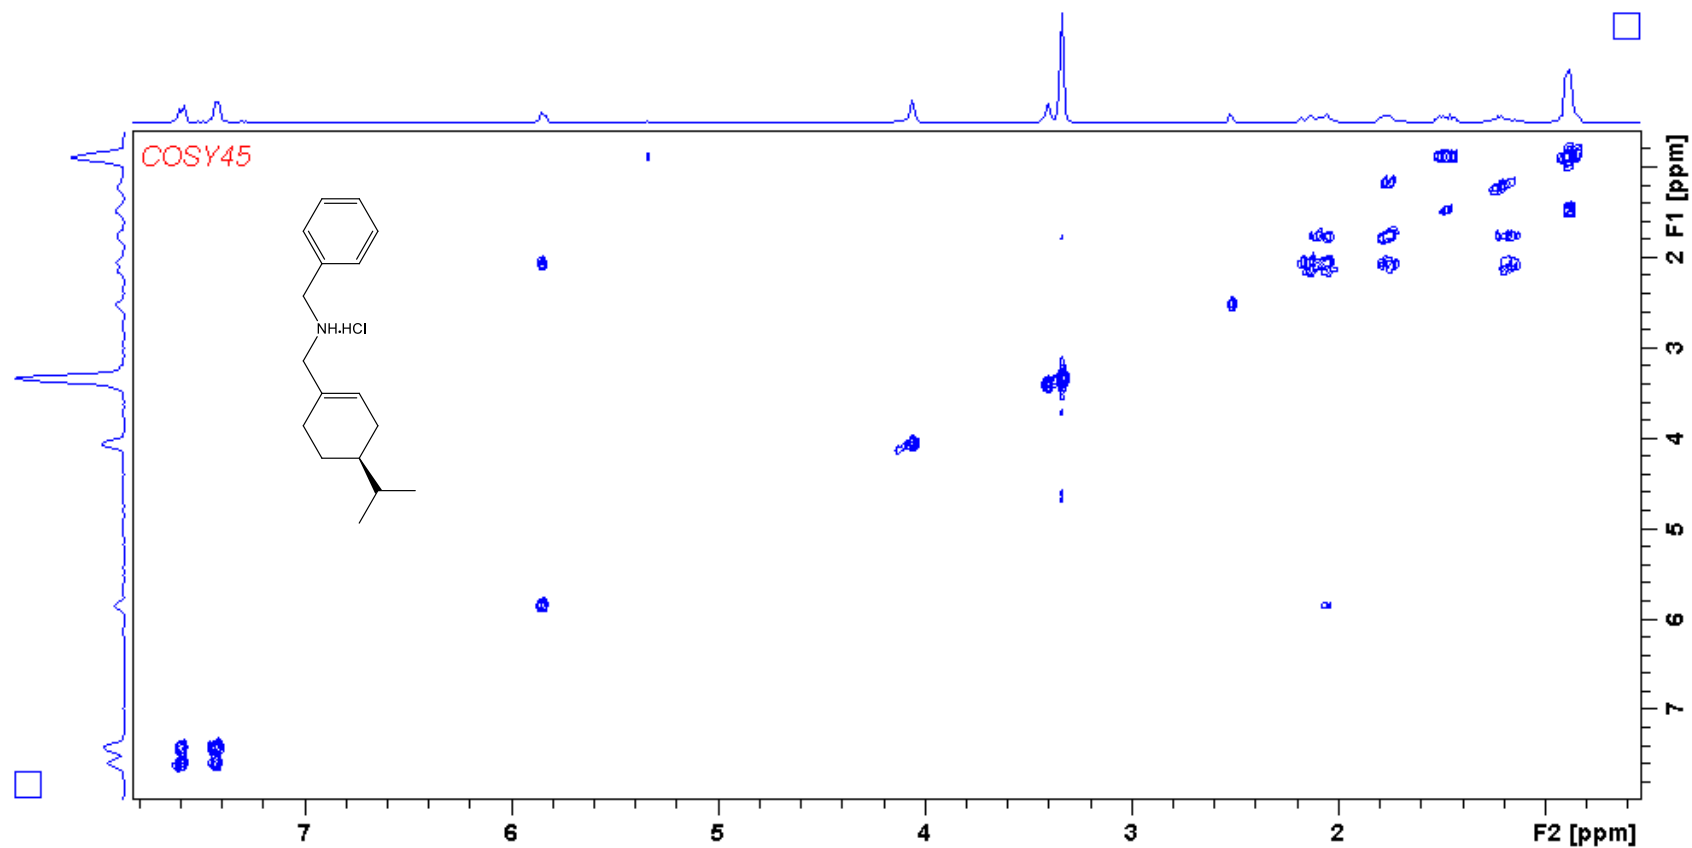



Figure S4:

<sup>1</sup>H-NMR of compound (*R*)-*N*-(((*S*)-4-Isopropylcyclohex-1-en-1-yl)methyl)-1-phenylethanamine hydrochloride **3b**

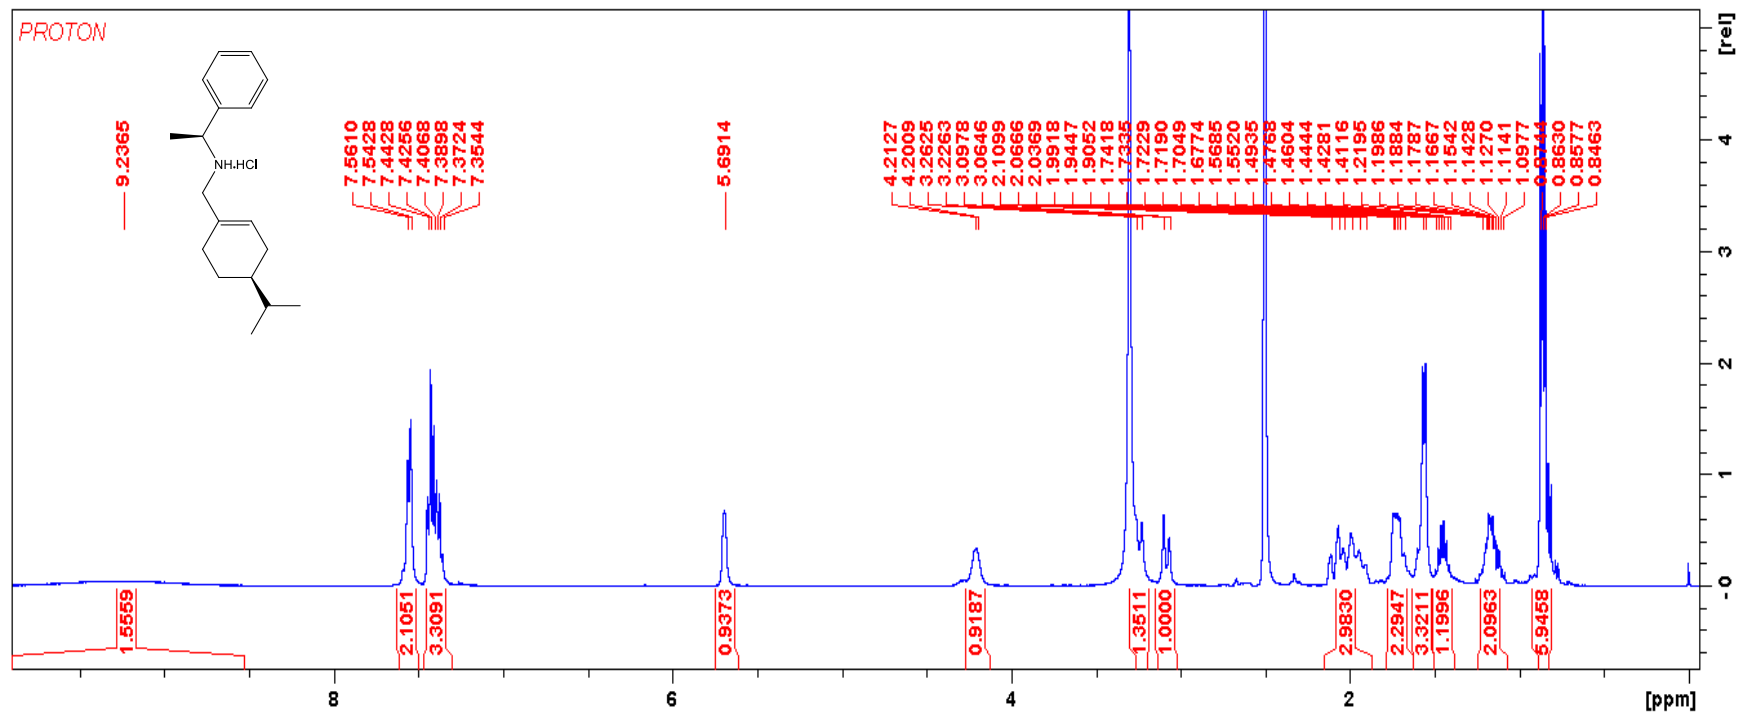

**Figure S5:**

**$^{13}\text{C}$ -NMR of compound (*R*)-*N*-(((*S*)-4-Isopropylcyclohex-1-en-1-yl)methyl)-1-phenylethanamine hydrochloride **3b****

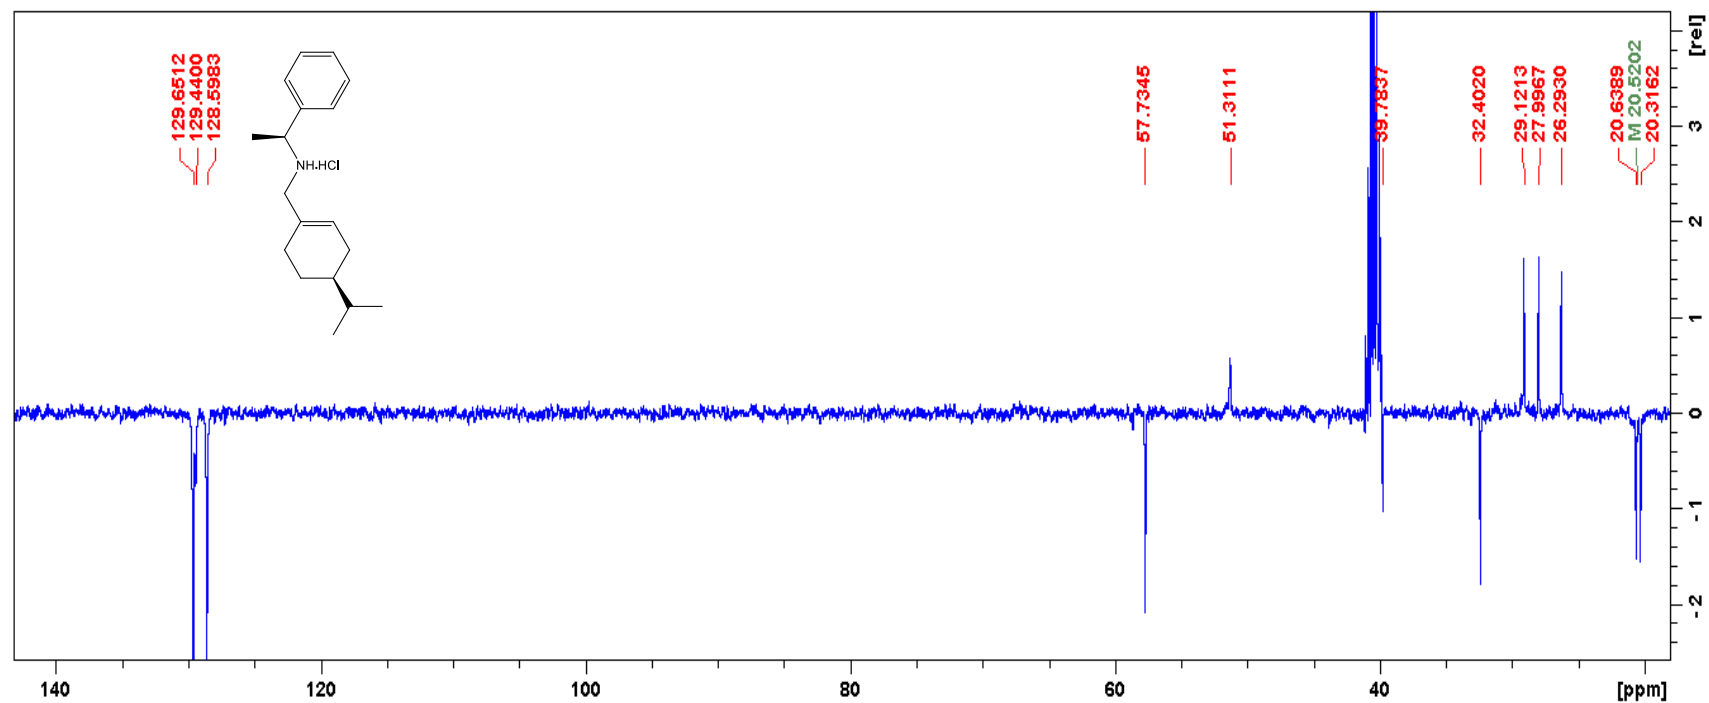

**Figure S6:**

**COSY of compound (*R*)-*N*-(((*S*)-4-Isopropylcyclohex-1-en-1-yl)methyl)-1-phenylethanamine hydrochloride **3b****

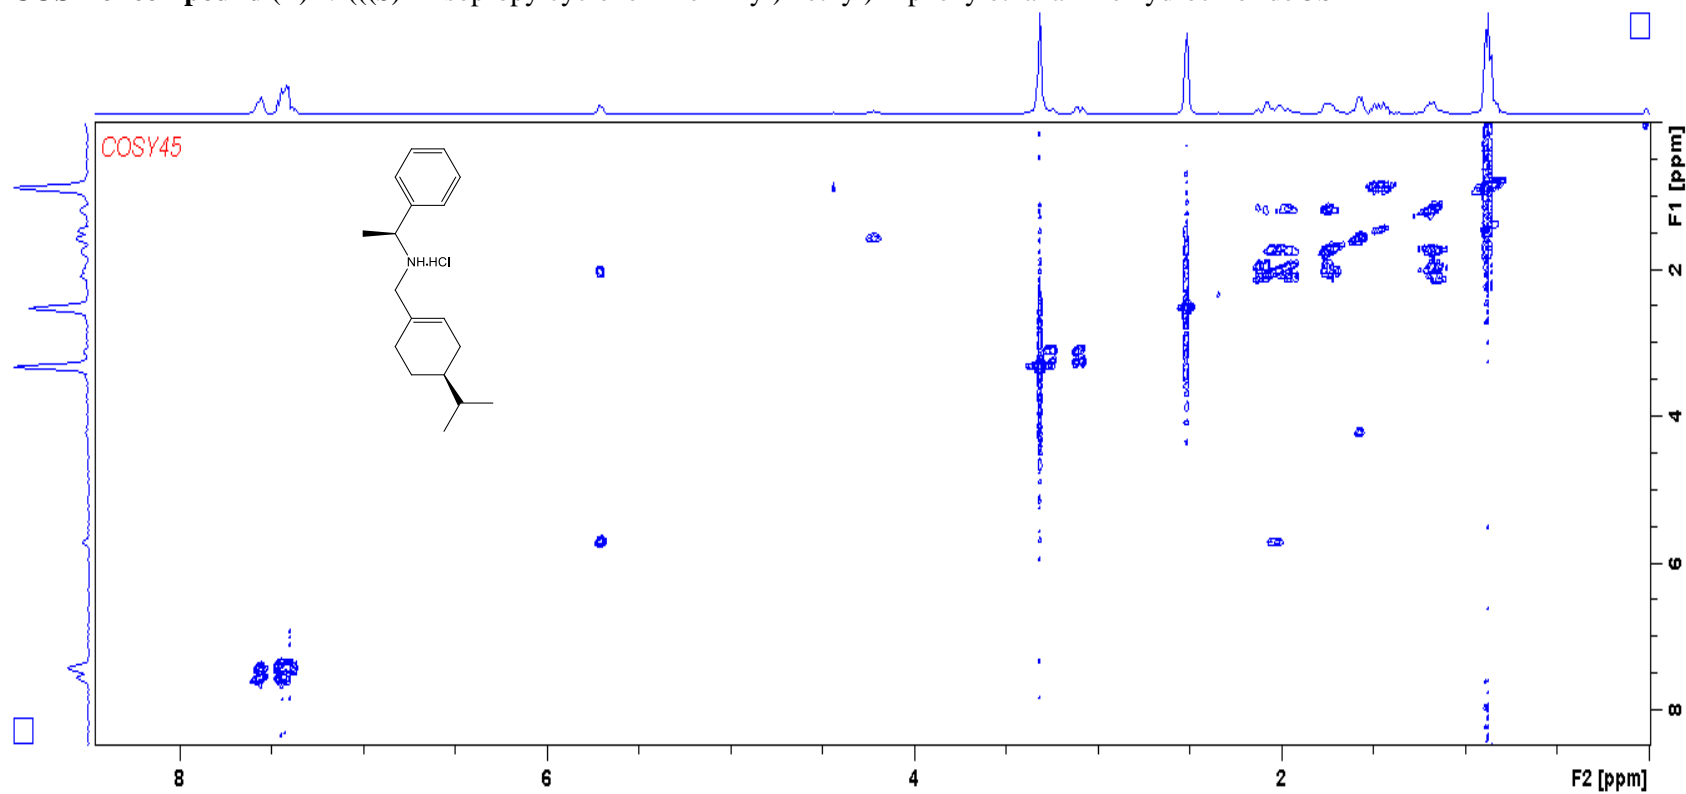

**Figure S7:**

**HSQC NMR of compound** *(R)-N-(((S)-4-Isopropylcyclohex-1-en-1-yl)methyl)-1-phenylethanamine hydrochloride 3b*

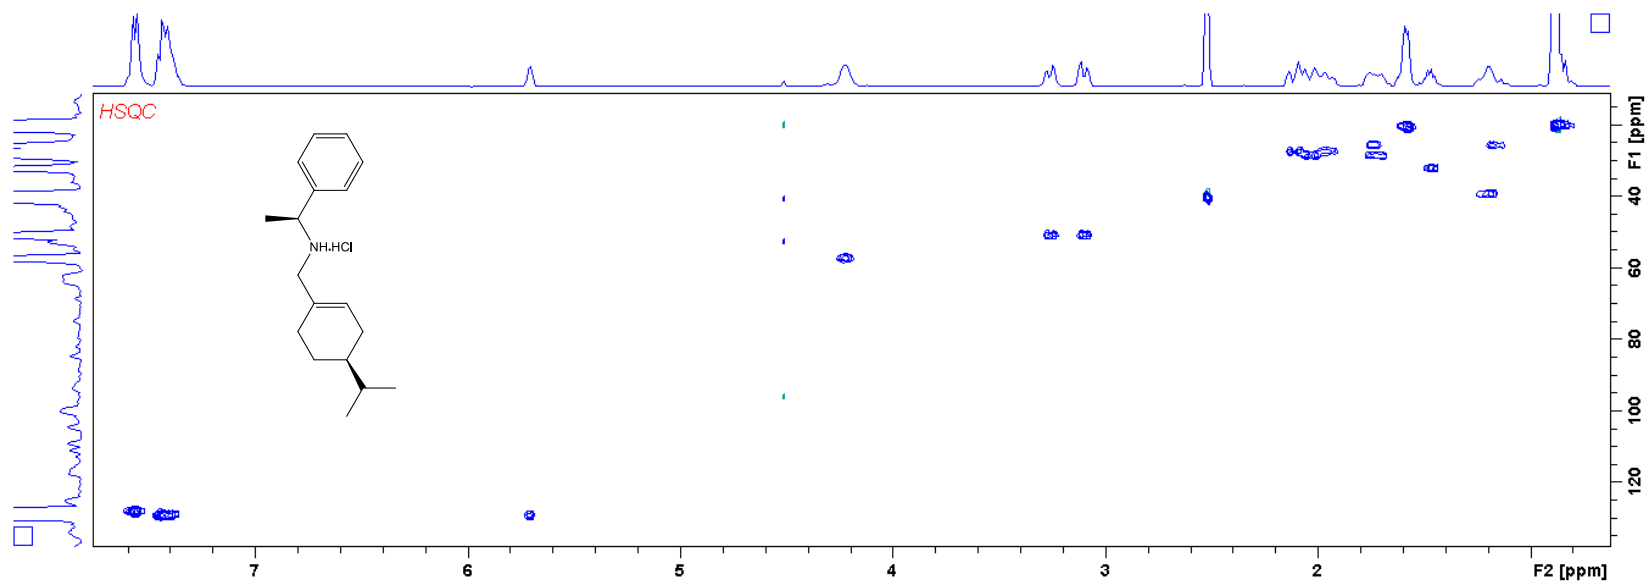

**Figure S8:**

**HMBC NMR of compound (*R*)-*N*-(((*S*)-4-Isopropylcyclohex-1-en-1-yl)methyl)-1-phenylethanamine hydrochloride **3b****

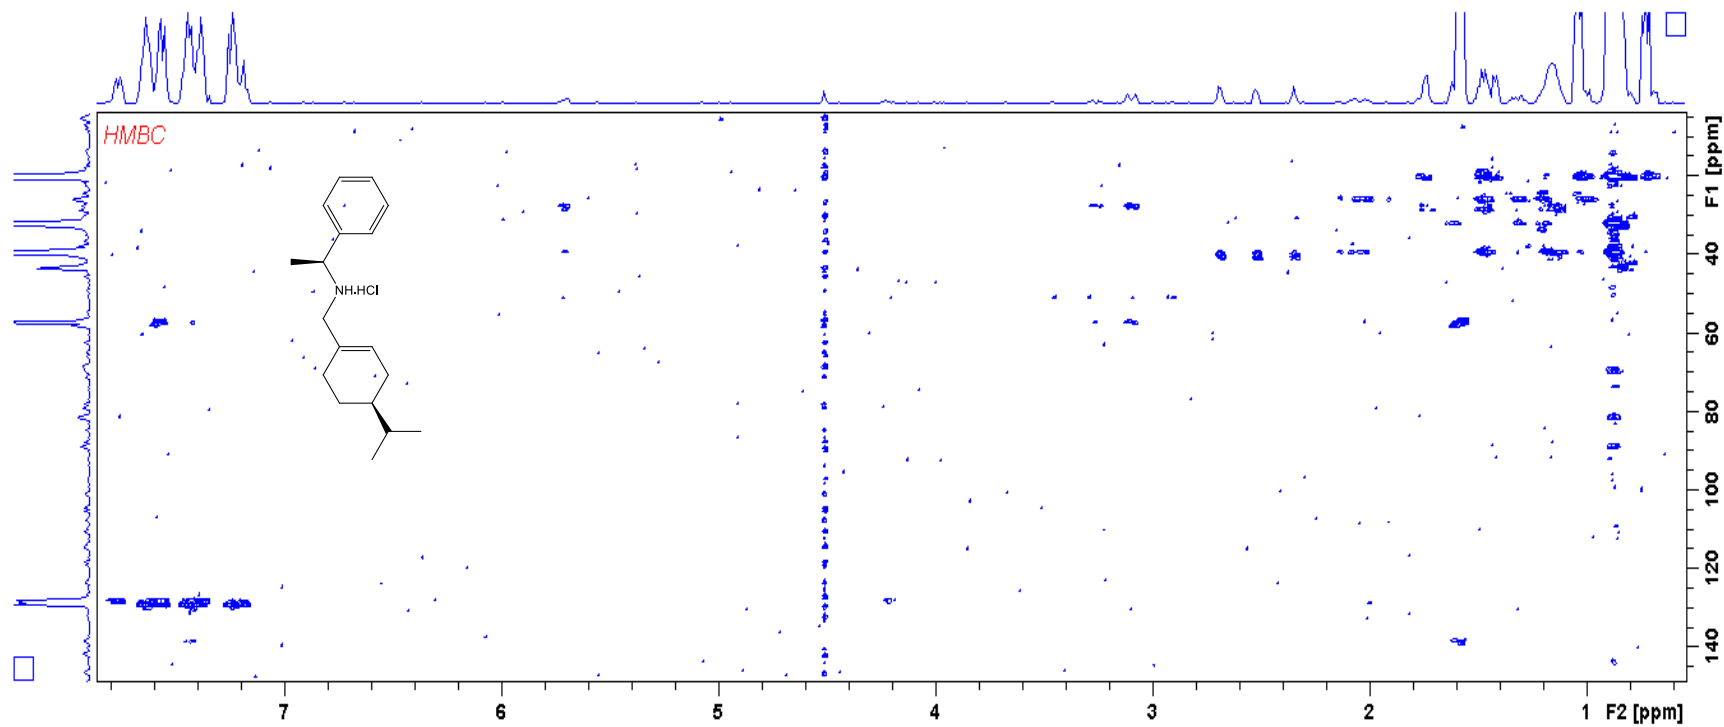

Figure S9:

<sup>1</sup>H-NMR of compound (*S*)-*N*-(((*S*)-4-Isopropylcyclohex-1-en-1-yl)methyl)-1-phenylethanamine hydrochloride **3c**

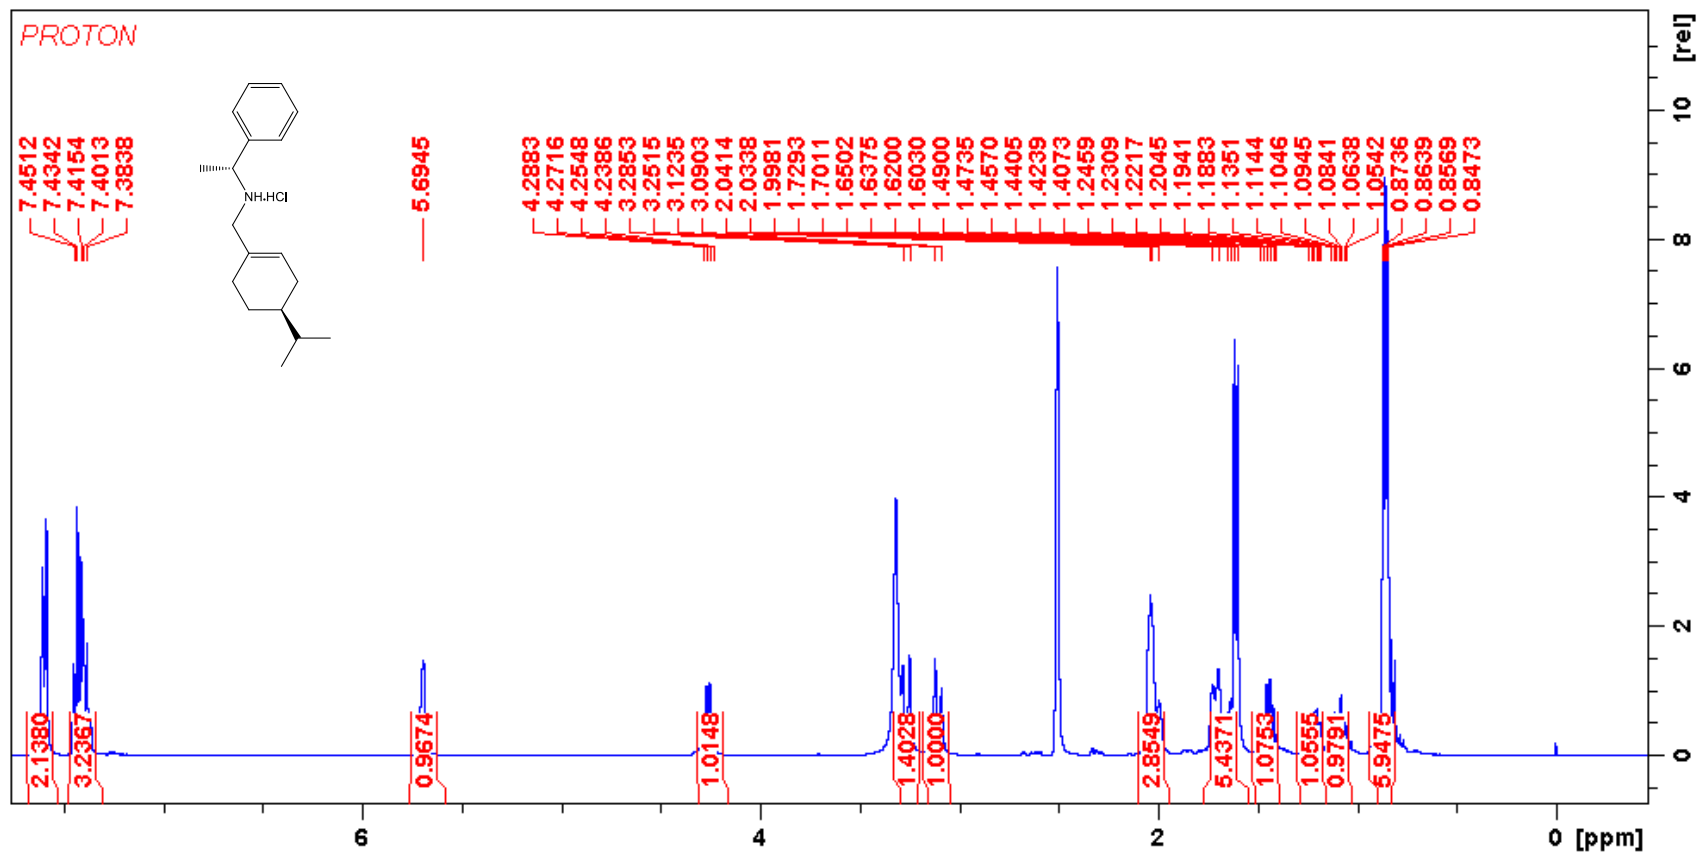

**Figure S10:**

**$^{13}\text{C}$ -NMR of compound** (*S*)-*N*-(((*S*)-4-Isopropylcyclohex-1-en-1-yl)methyl)-1-phenylethanamine hydrochloride **3c**

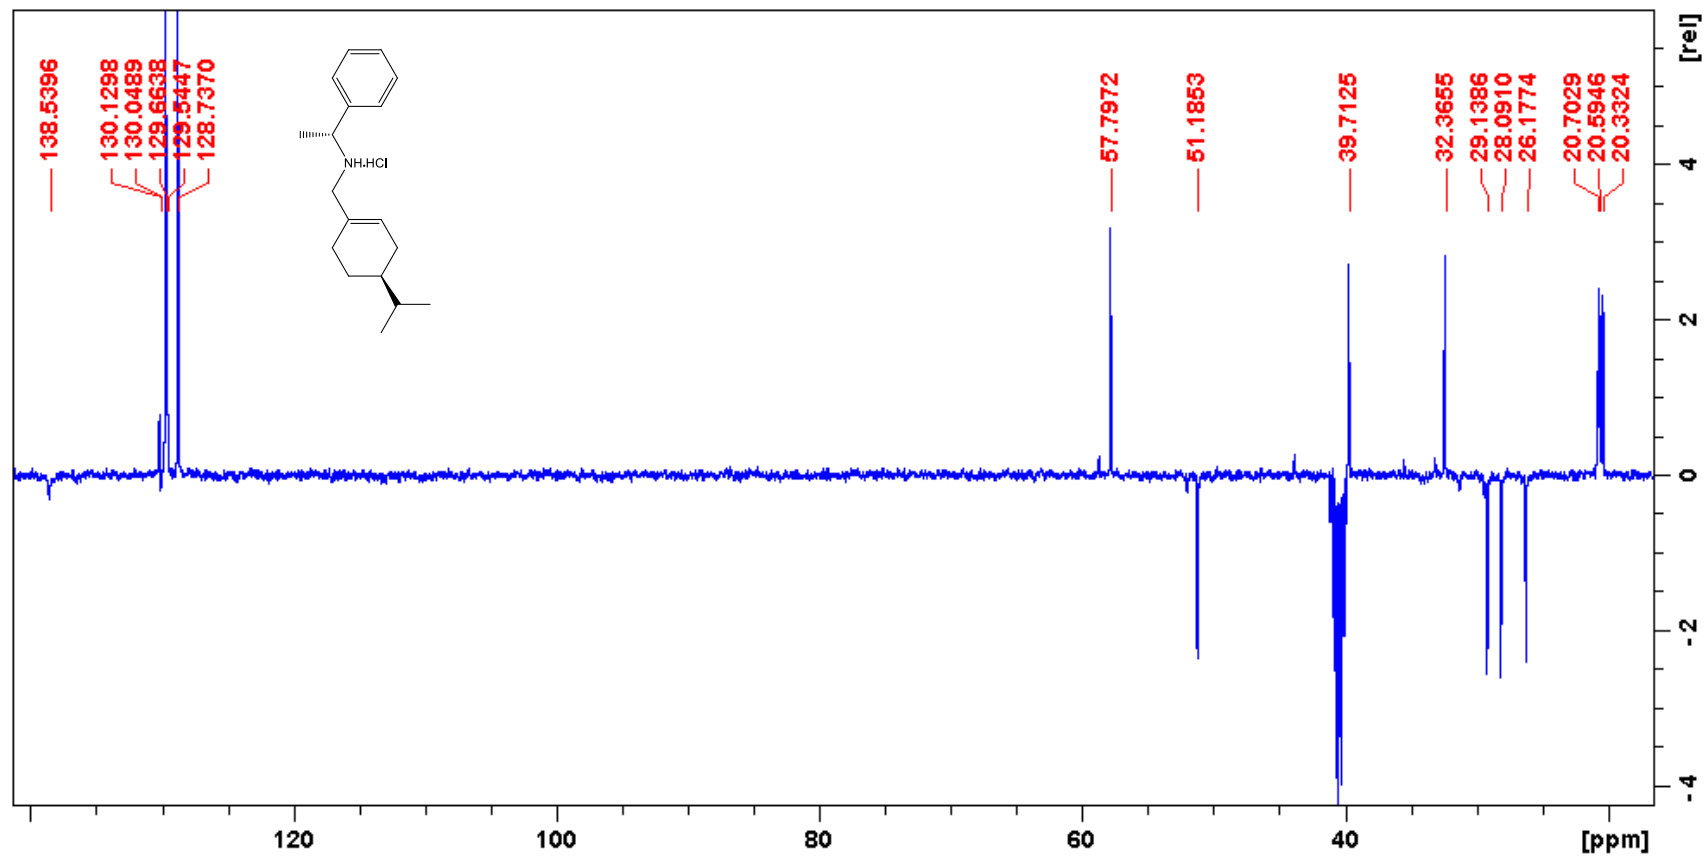

**Figure S11:**

**COSY of compound** (*S*)-*N*-(((*S*)-4-Isopropylcyclohex-1-en-1-yl)methyl)-1-phenylethanamine hydrochloride **3c**

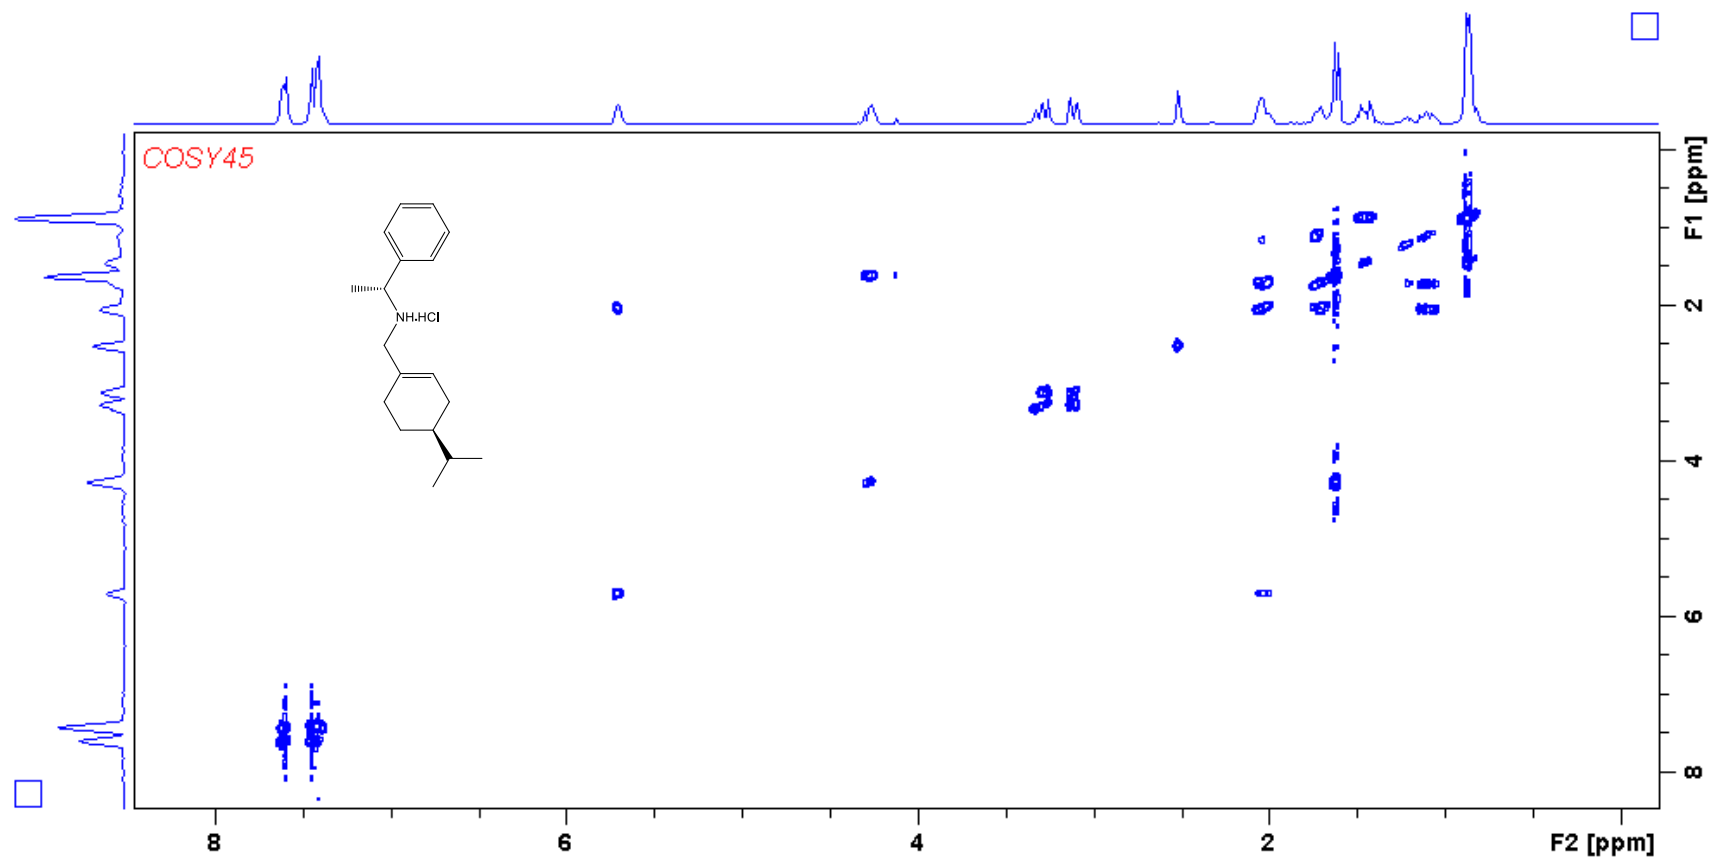



**HSQC of compound** (*S*)-*N*-(((*S*)-4-Isopropylcyclohex-1-en-1-yl)methyl)-1-phenylethanamine hydrochloride **3c**

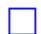

**Figure S13:**

**HMBC of compound** *(S)*-*N*-(((*S*)-4-Isopropylcyclohex-1-en-1-yl)methyl)-1-phenylethanamine hydrochloride **3c**

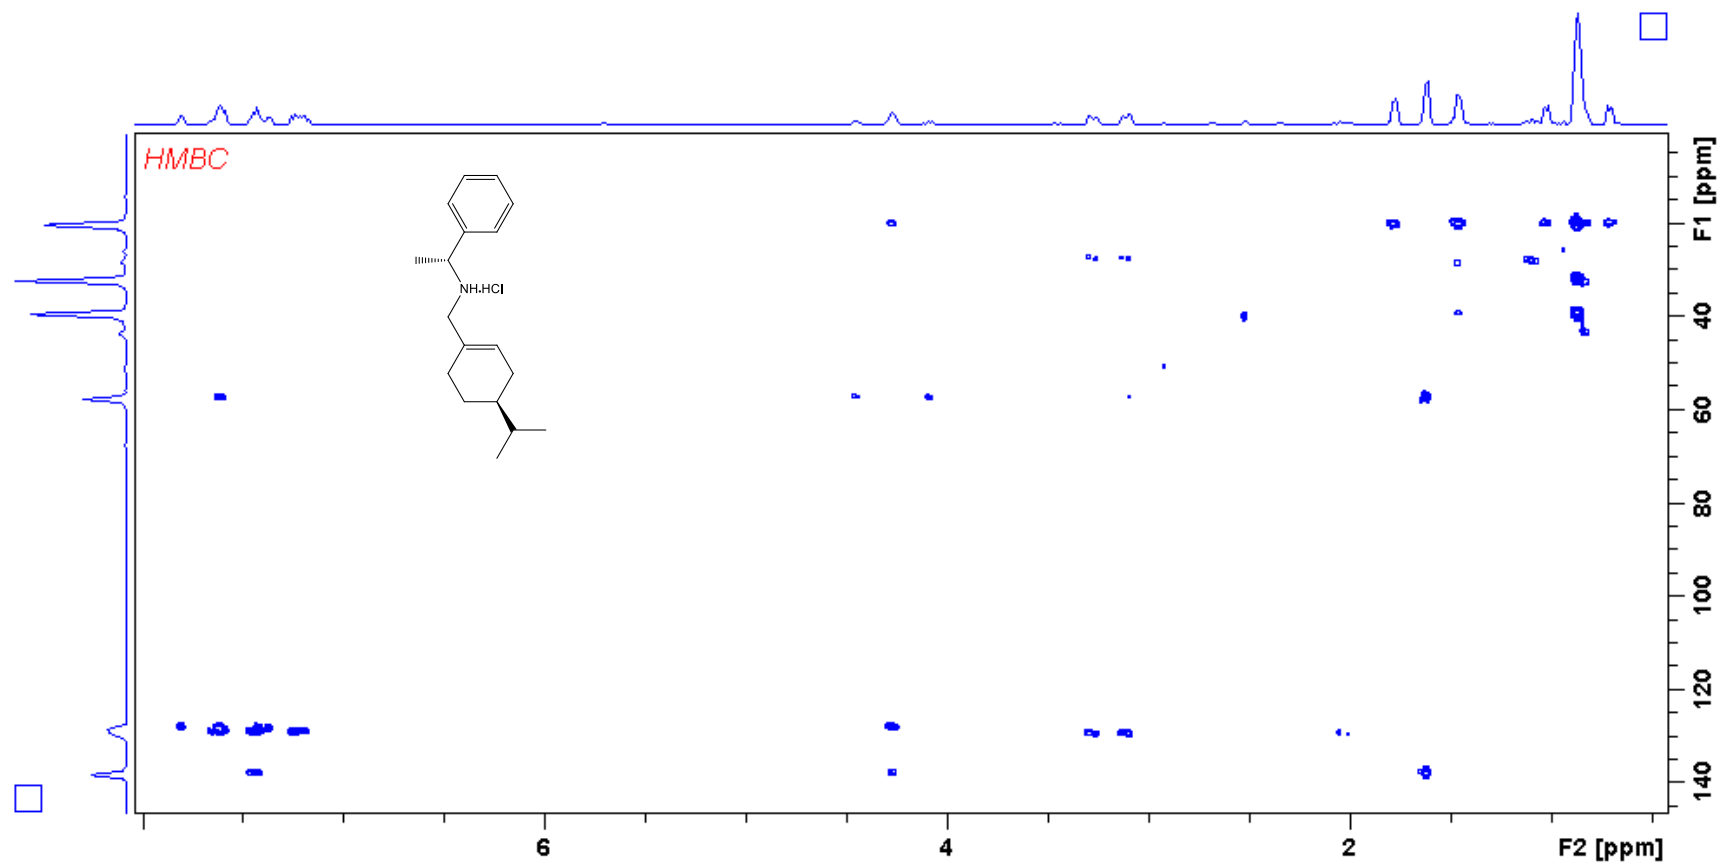

Szakonyi Zsolt  
ugi128 1 1 szakonyi

Chemical structure of compound 1: CC1(C)CCC(CC1)CCN(Cc2ccccc2)C(=O)OCC

<sup>1</sup>H NMR spectrum (CDCl<sub>3</sub>) data:

| Chemical Shift (ppm)                                                                                                                                                                                   | Integration                             |
|--------------------------------------------------------------------------------------------------------------------------------------------------------------------------------------------------------|-----------------------------------------|
| 7.2781, 7.2503, 7.2439, 7.2264, 7.2085                                                                                                                                                                 | 5.0045                                  |
| 5.4542                                                                                                                                                                                                 | 0.8500                                  |
| 4.3324                                                                                                                                                                                                 | 2.0325                                  |
| 3.7827, 3.6851                                                                                                                                                                                         | 1.7226                                  |
| 2.0560, 2.0126, 1.9279, 1.7736, 1.7684, 1.7429, 1.7381, 1.7006, 1.6916, 1.4901, 1.4619, 1.2571, 1.2399, 1.1940, 1.1794, 1.1644, 1.1493, 1.1383, 1.1229, 1.1089, 1.0933, 0.9990, 0.8871, 0.8811, 0.8702 | 2.6797, 2.1817, 10.0976, 2.0713, 6.0000 |
| 0.0003                                                                                                                                                                                                 |                                         |

**Figure S 15:**  $^{13}\text{C}$ -NMR of compound (*S*)-*tert*-butyl benzyl((4-isopropylcyclohex-1-en-1-yl)methyl)carbamate **4a**

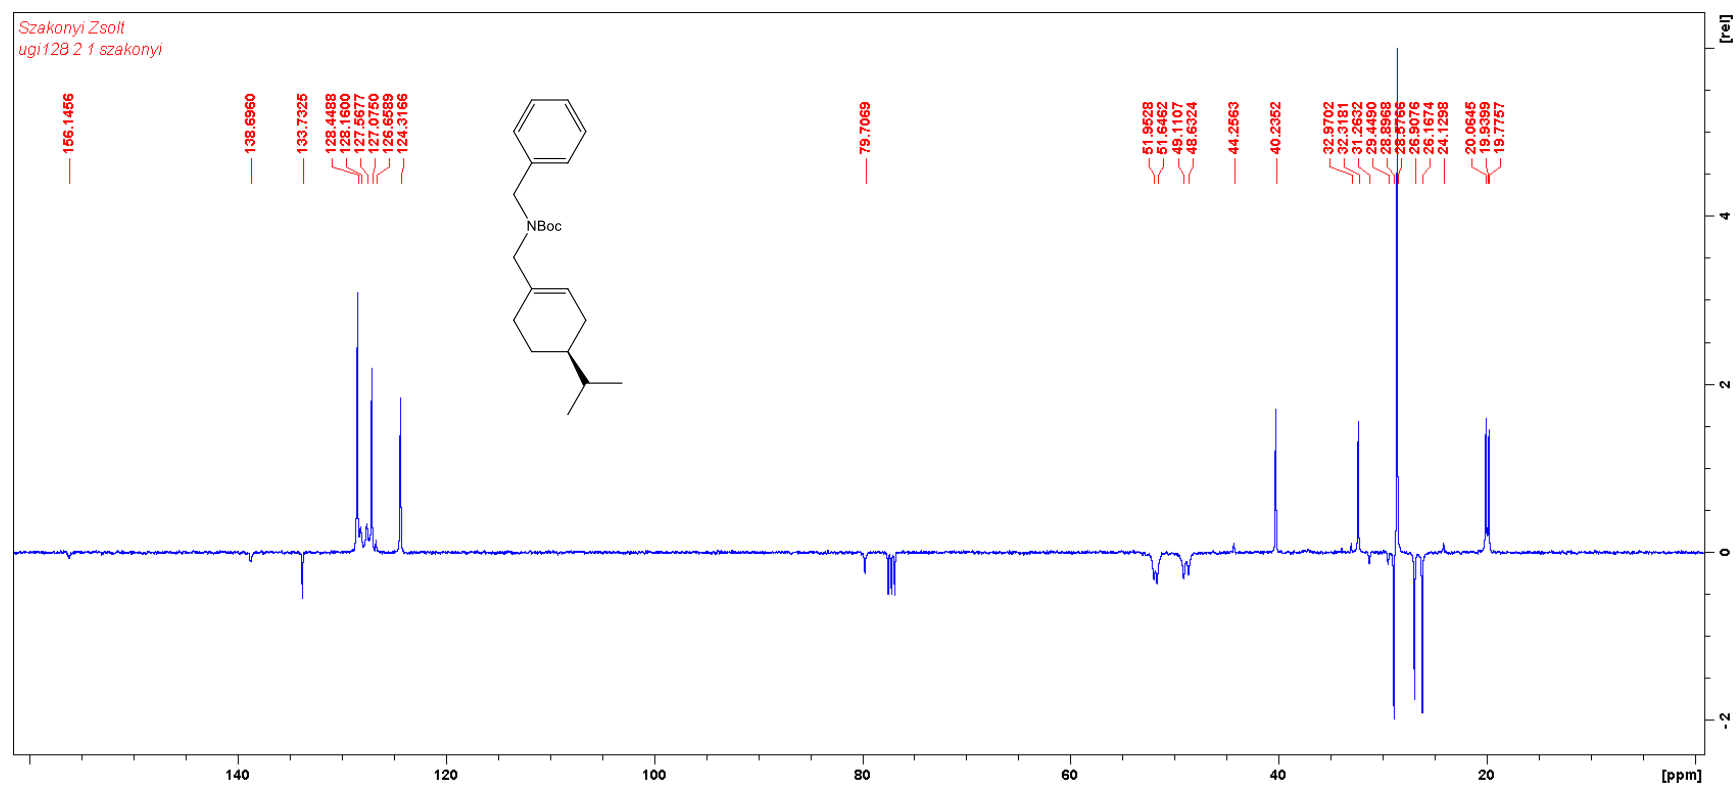

**Figure S 16:  $^1\text{H}$ -NMR of compound *tert*-butyl (((*S*)-4-isopropylcyclohex-1-en-1-yl)methyl)((*S*)-1-phenylethyl)carbamate **4b****

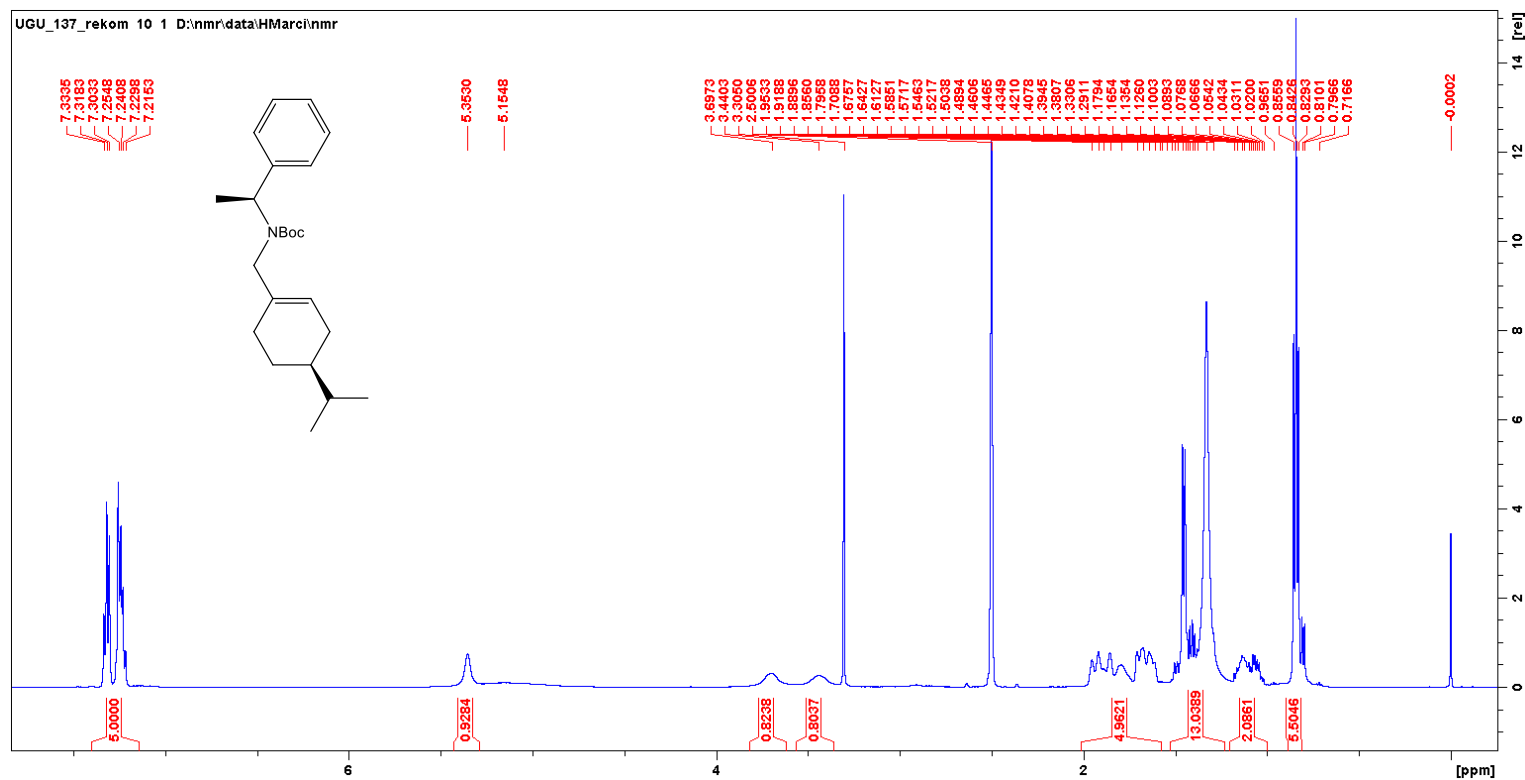

**Figure S 17:**  $^{13}\text{C}$ -NMR of compound *tert*-butyl (((*S*)-4-isopropylcyclohex-1-en-1-yl)methyl)((*S*)-1-phenylethyl)carbamate **4b**

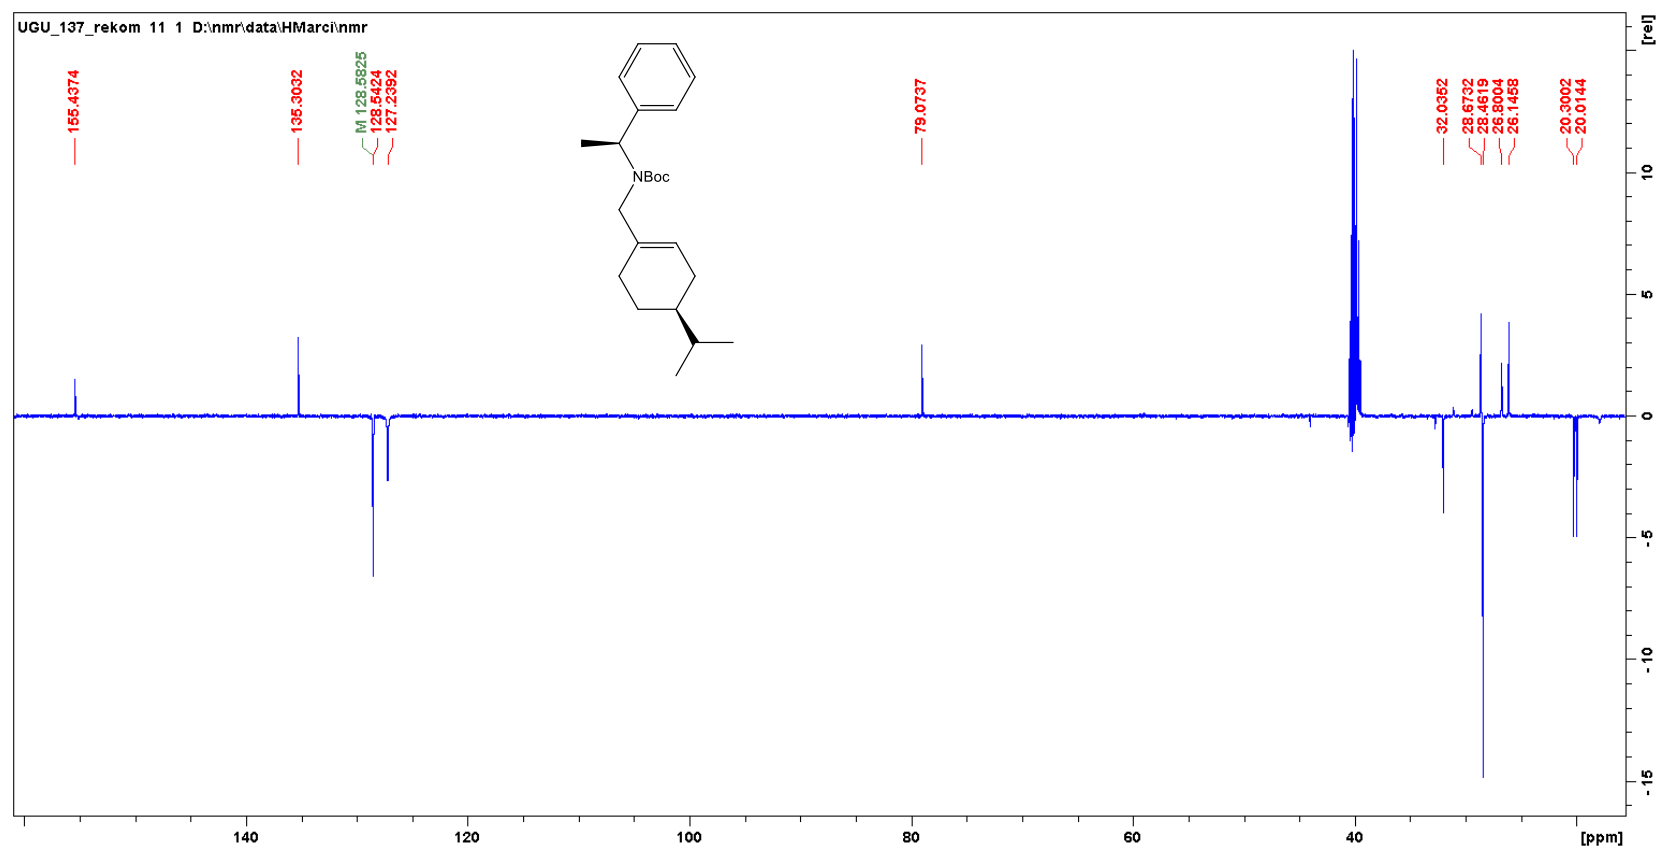

**Figure S 18: COSY NMR of compound *tert*-butyl (((*S*)-4-isopropylcyclohex-1-en-1-yl)methyl)((*S*)-1-phenylethyl)carbamate **4b****

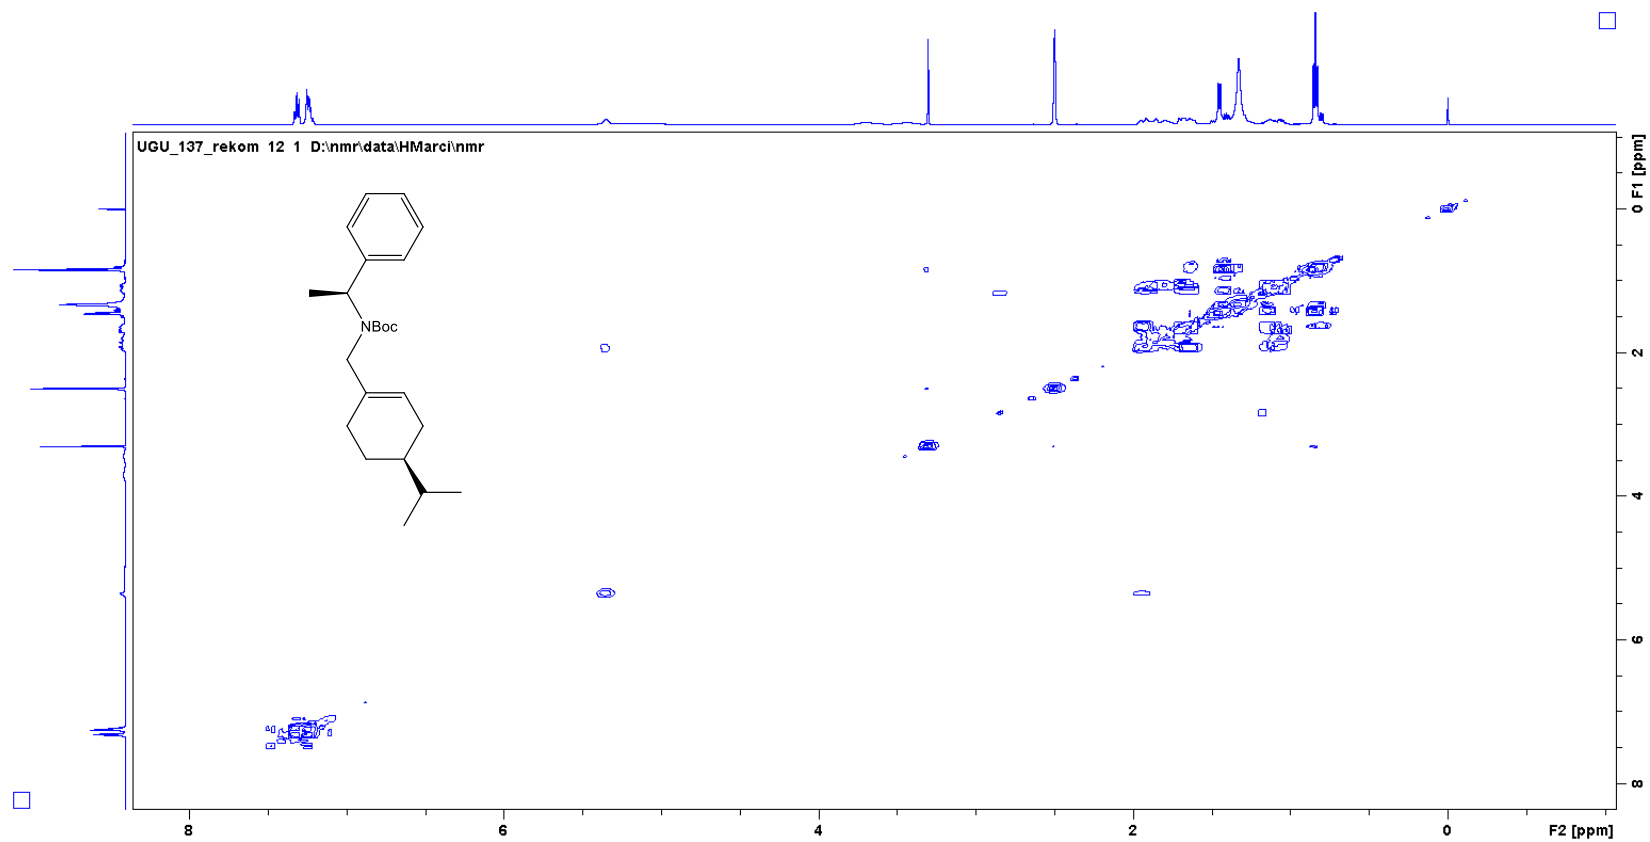

UGU\_137\_rekom 13 1 D:\nmr\data\HMar\13nmr

Chemical structure of compound 13 is shown in the top left corner of the plot area.



**Figure S 20: HMBC NMR of compound *tert*-butyl (((*S*)-4-isopropylcyclohex-1-en-1-yl)methyl)((*S*)-1-phenylethyl)carbamate **4b****

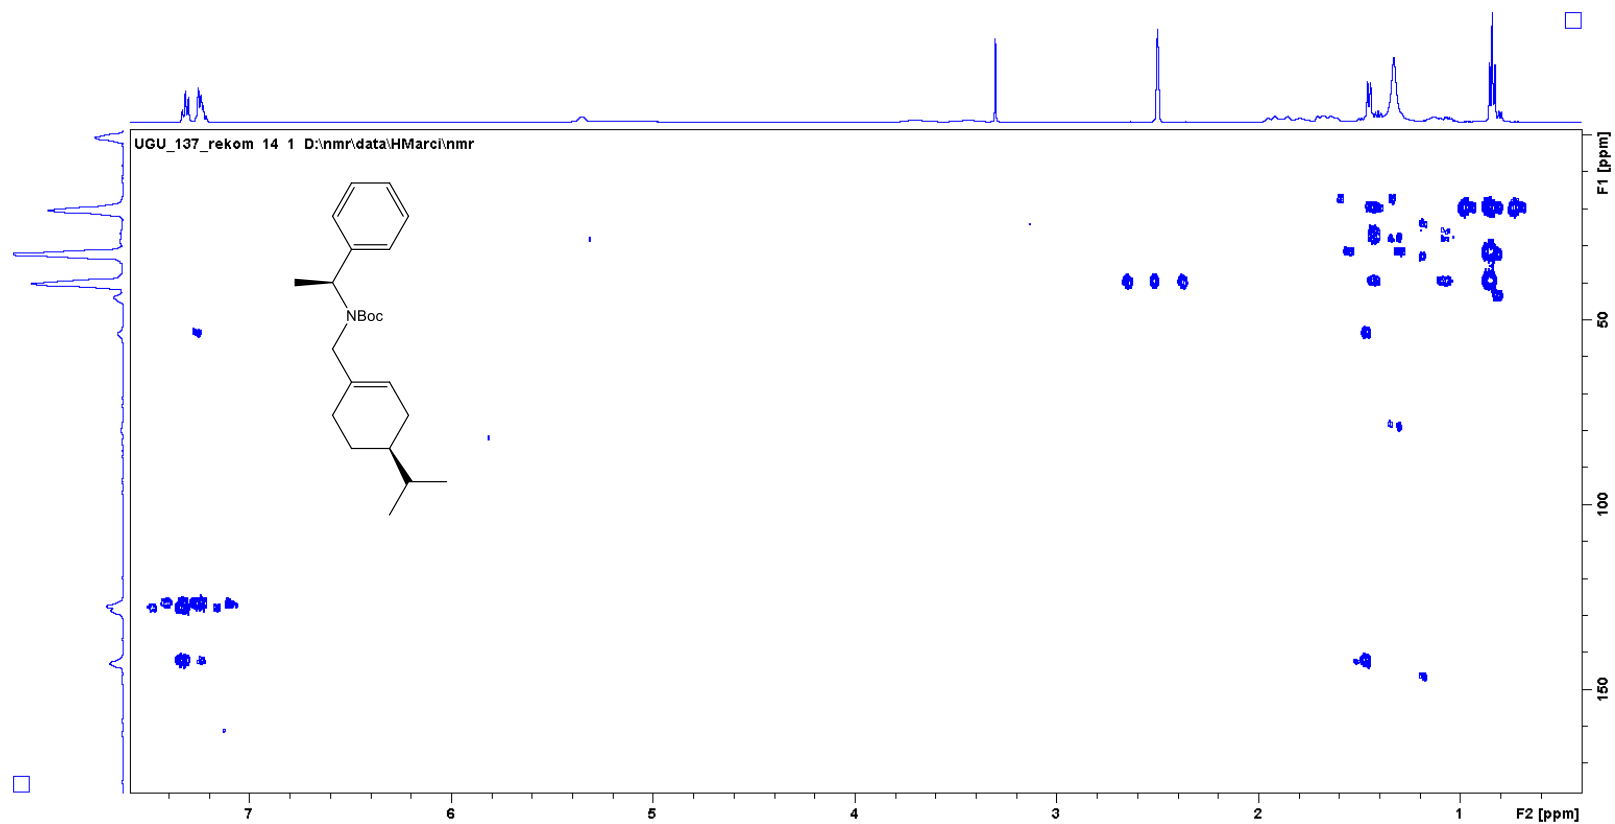

**Figure S 21:  $^1\text{H}$ -NMR of compound *tert*-butyl (((*S*)-4-isopropylcyclohex-1-en-1-yl)methyl)((*R*)-1-phenylethyl)carbamate **4c****

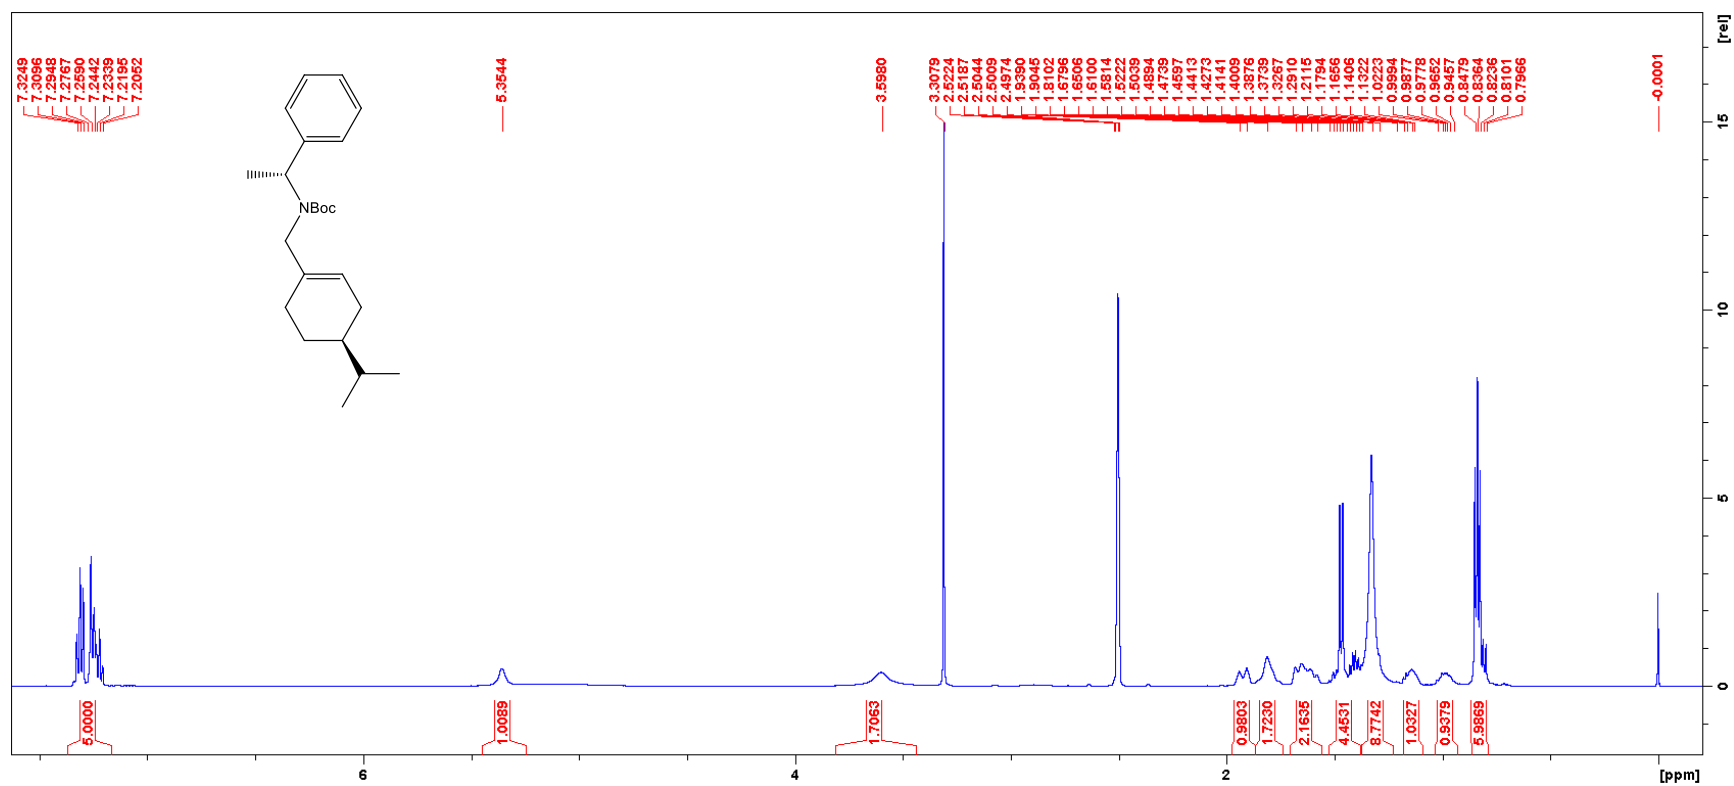

**Figure S 22:**  $^{13}\text{C}$ -NMR of compound *tert*-butyl (((*S*)-4-isopropylcyclohex-1-en-1-yl)methyl)((*R*)-1-phenylethyl)carbamate **4c**

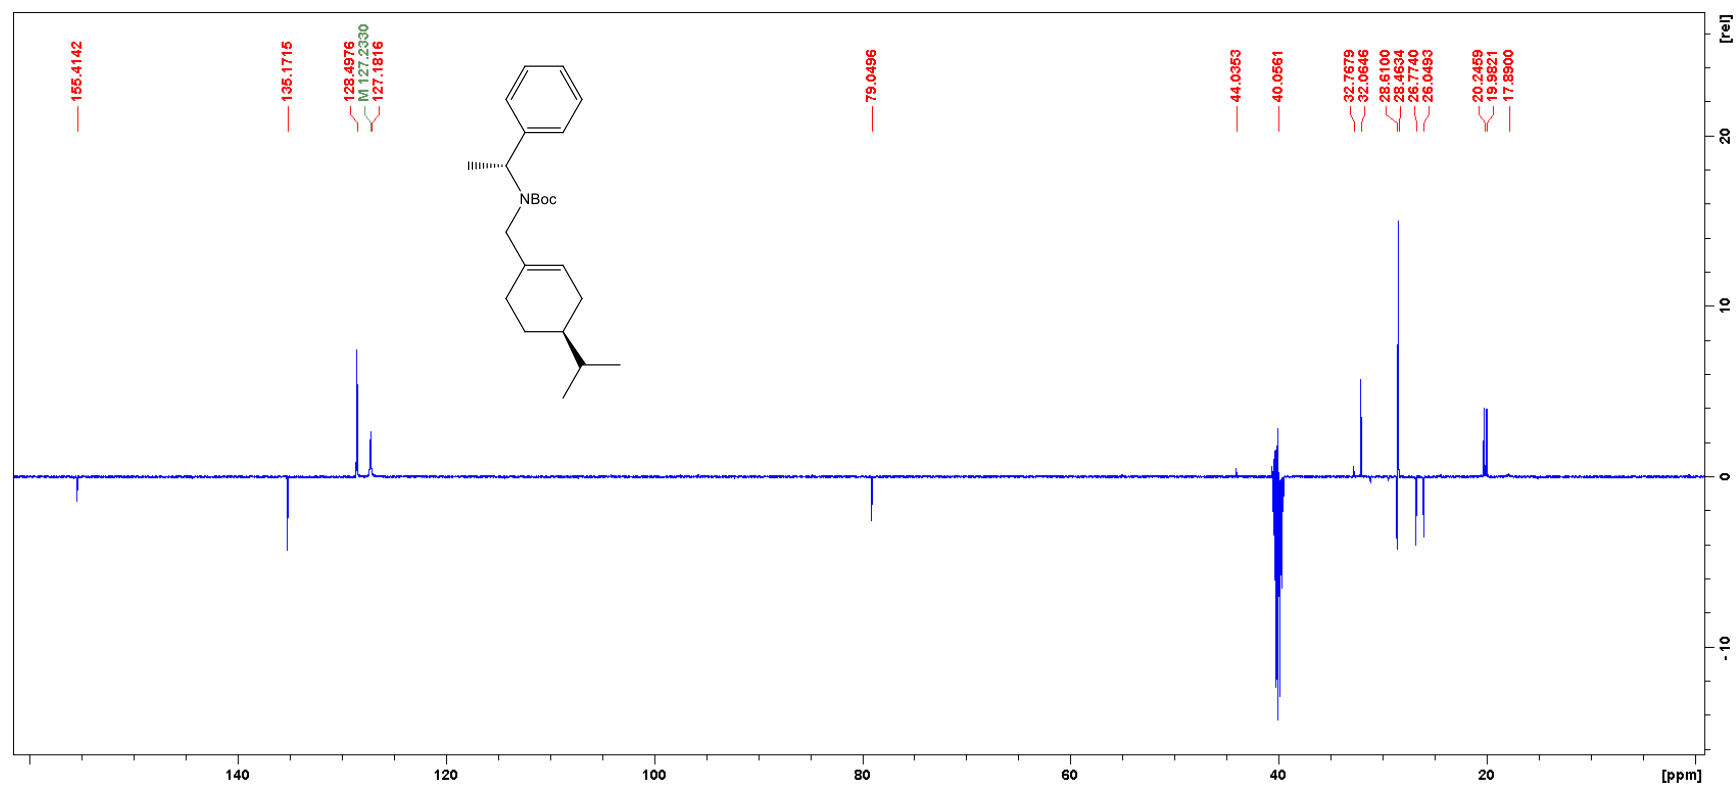

**Figure S 23: COSY NMR of compound** *tert*-butyl (((*S*)-4-isopropylcyclohex-1-en-1-yl)methyl)((*R*)-1-phenylethyl)carbamate **4c**

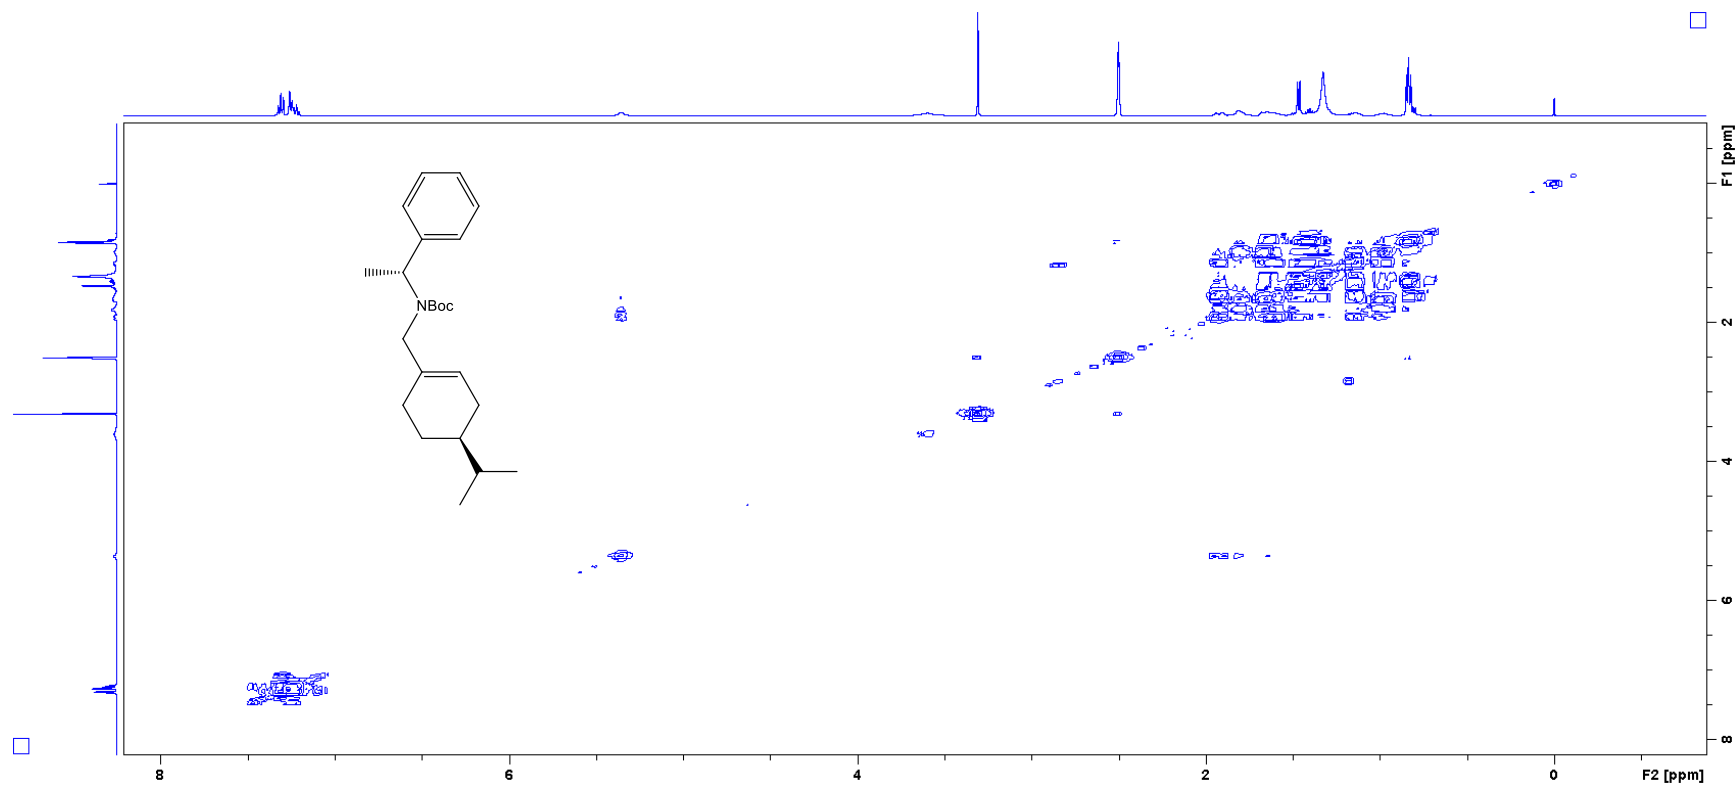

**Figure S 24: HSQC NMR of compound** *tert*-butyl (((*S*)-4-isopropylcyclohex-1-en-1-yl)methyl)((*R*)-1-phenylethyl)carbamate **4c**

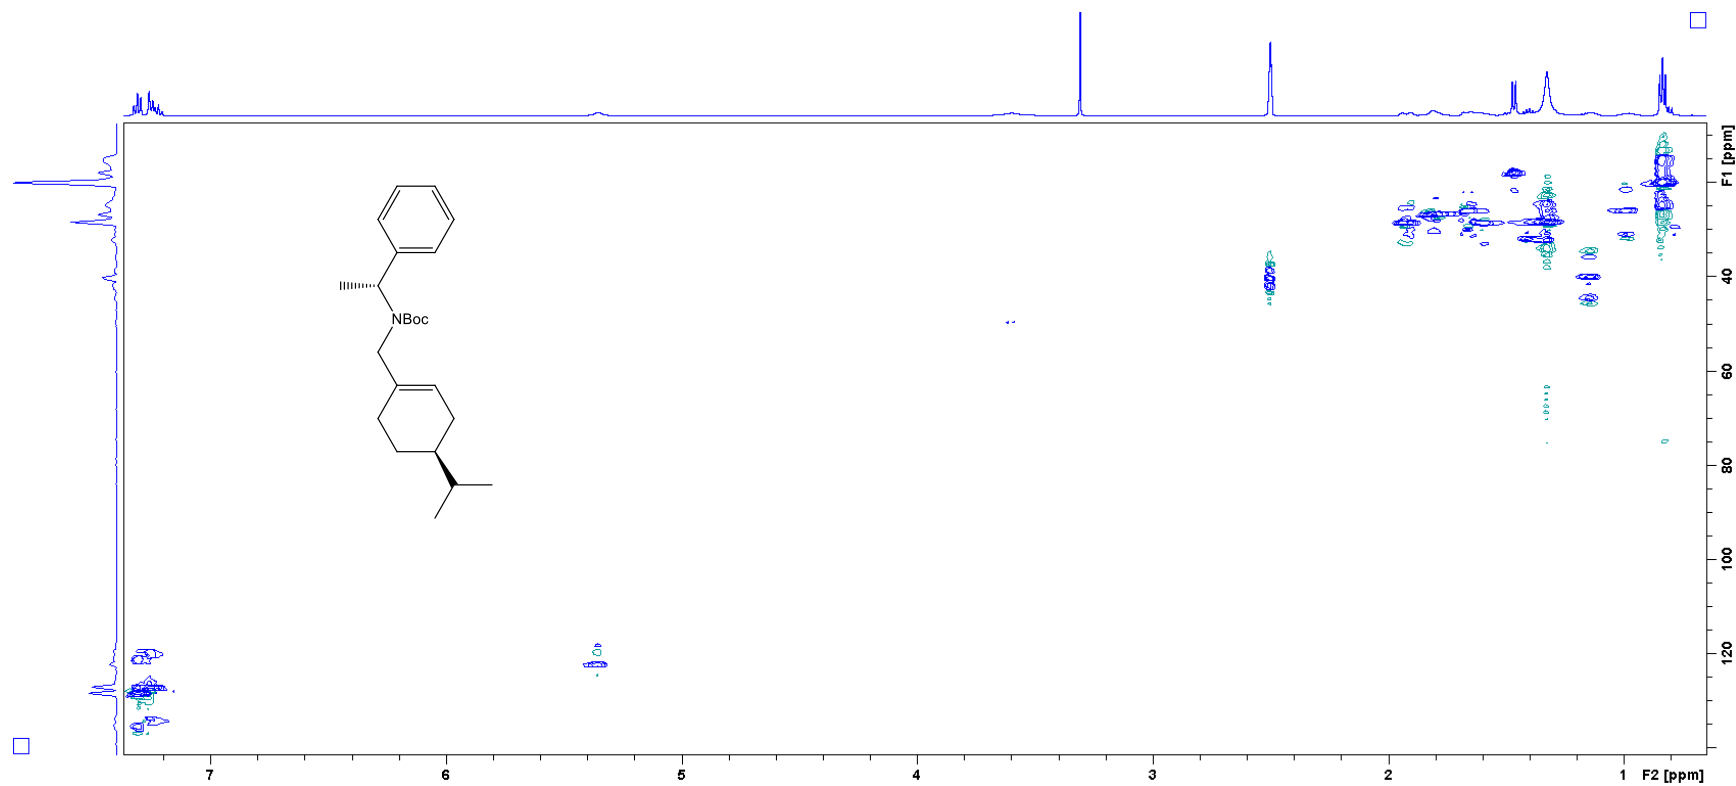

**Figure S 25: HMBC NMR of compound *tert*-butyl (((*S*)-4-isopropylcyclohex-1-en-1-yl)methyl)((*R*)-1-phenylethyl)carbamate **4c****

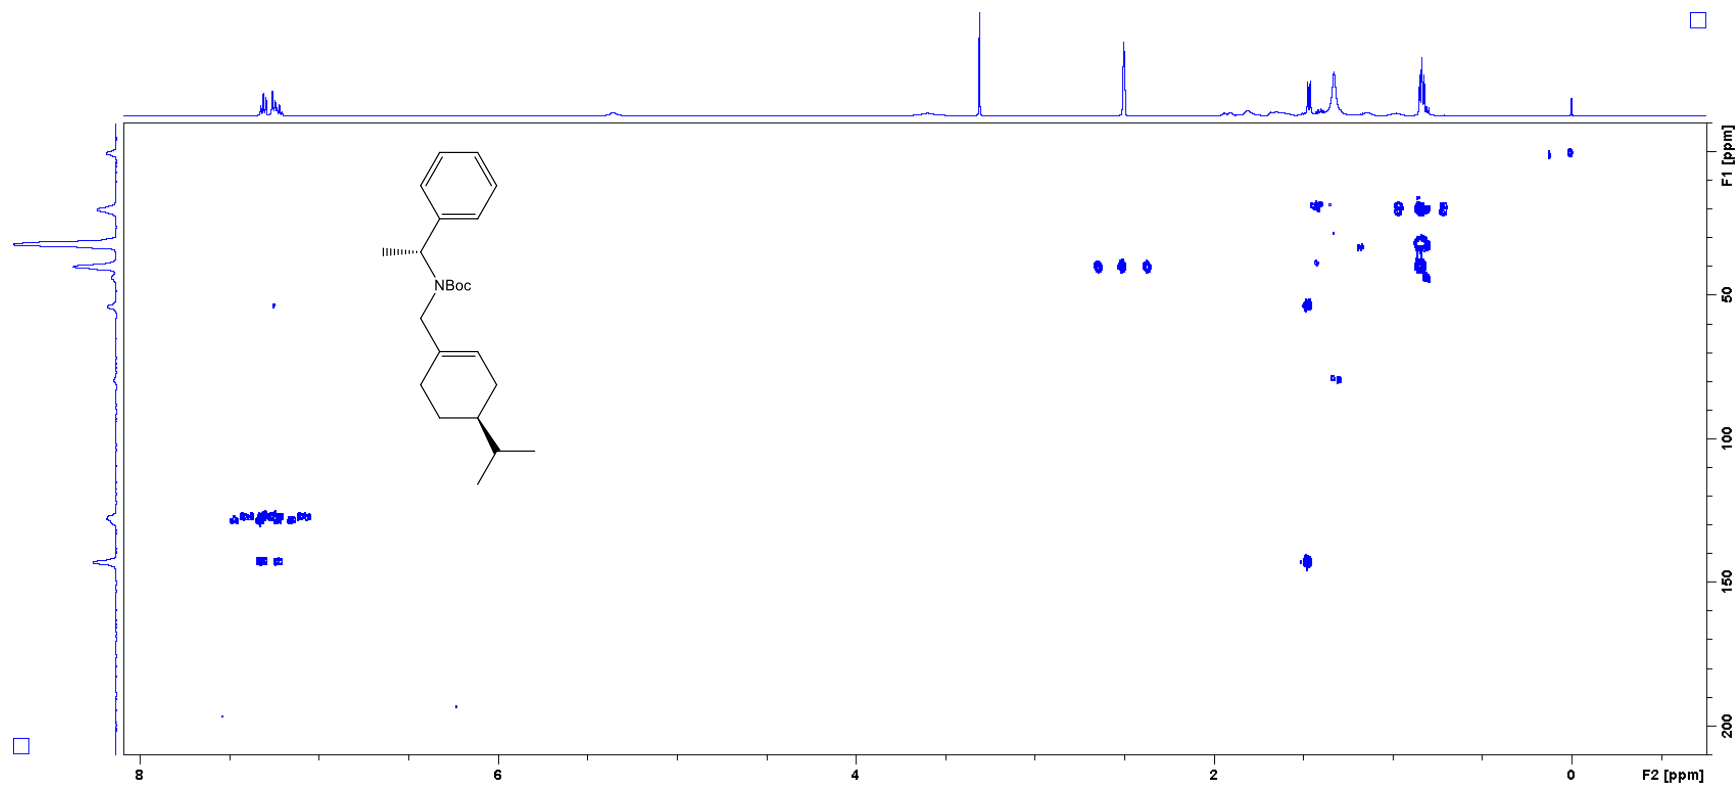

**Figure S 26:  $^1\text{H}$ -NMR of compound *tert*-butyl benzyl(((1*S*,2*S*,4*S*)-1,2-dihydroxy-4-isopropylcyclohexyl)methyl)carbamate **5a****

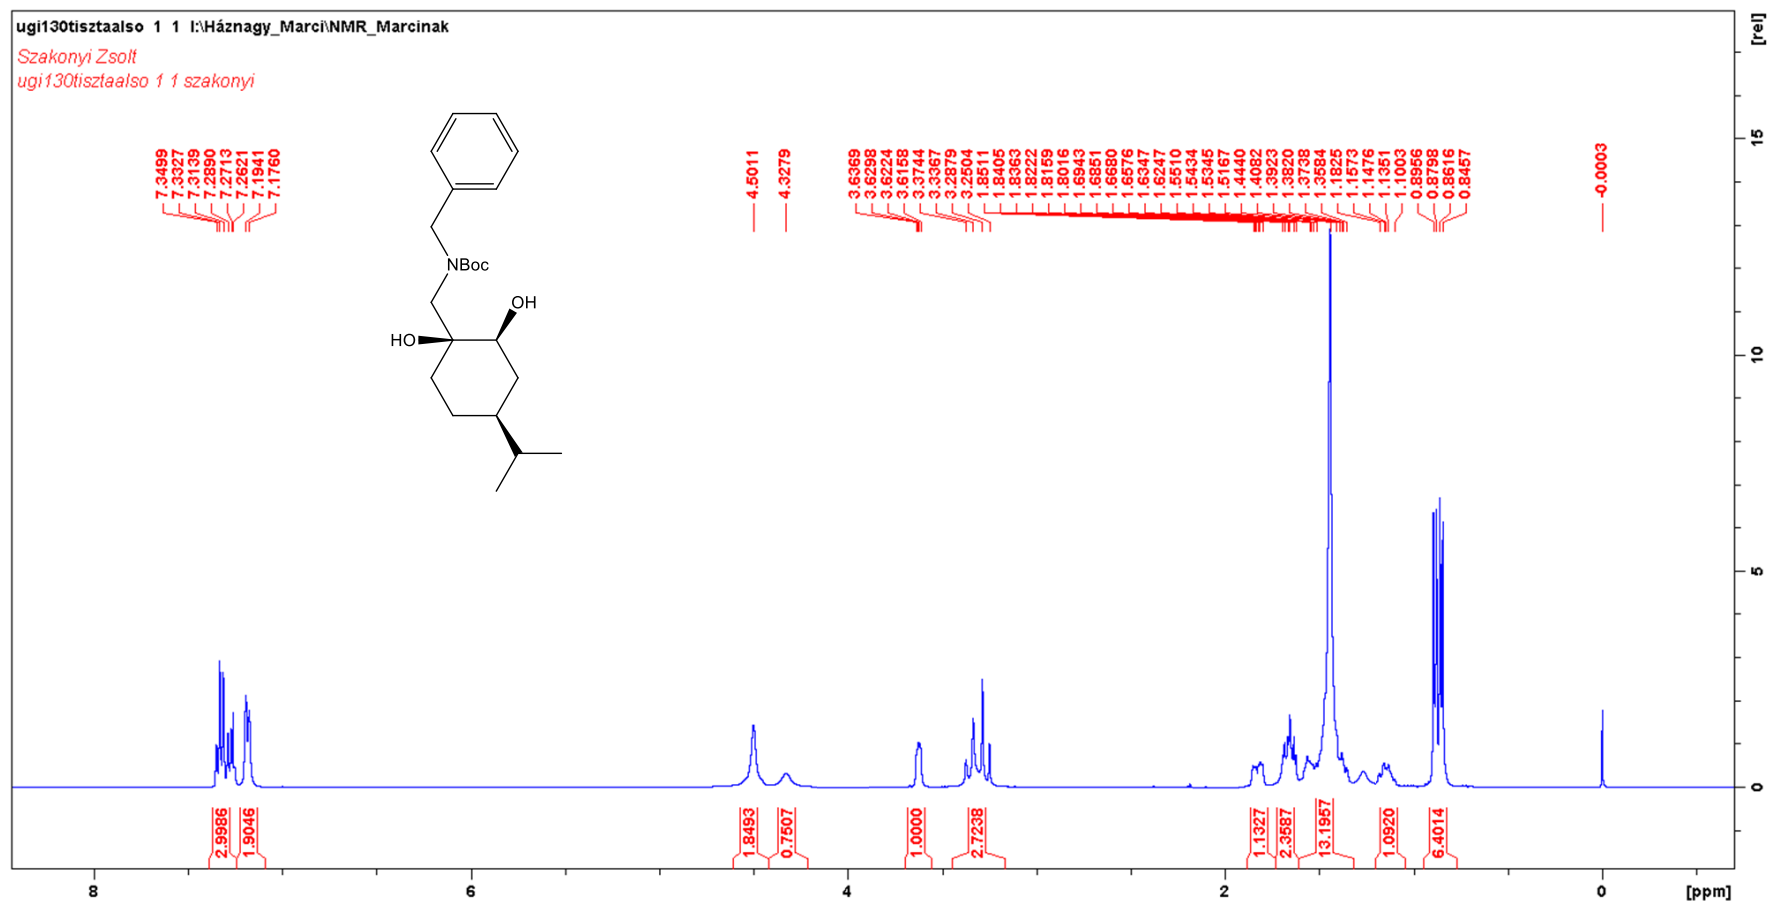

**Figure S 27:**  $^{13}\text{C}$ -NMR of compound *tert*-butyl benzyl(((1*S*,2*S*,4*S*)-1,2-dihydroxy-4-isopropylcyclohexyl)methyl)carbamate **5a**

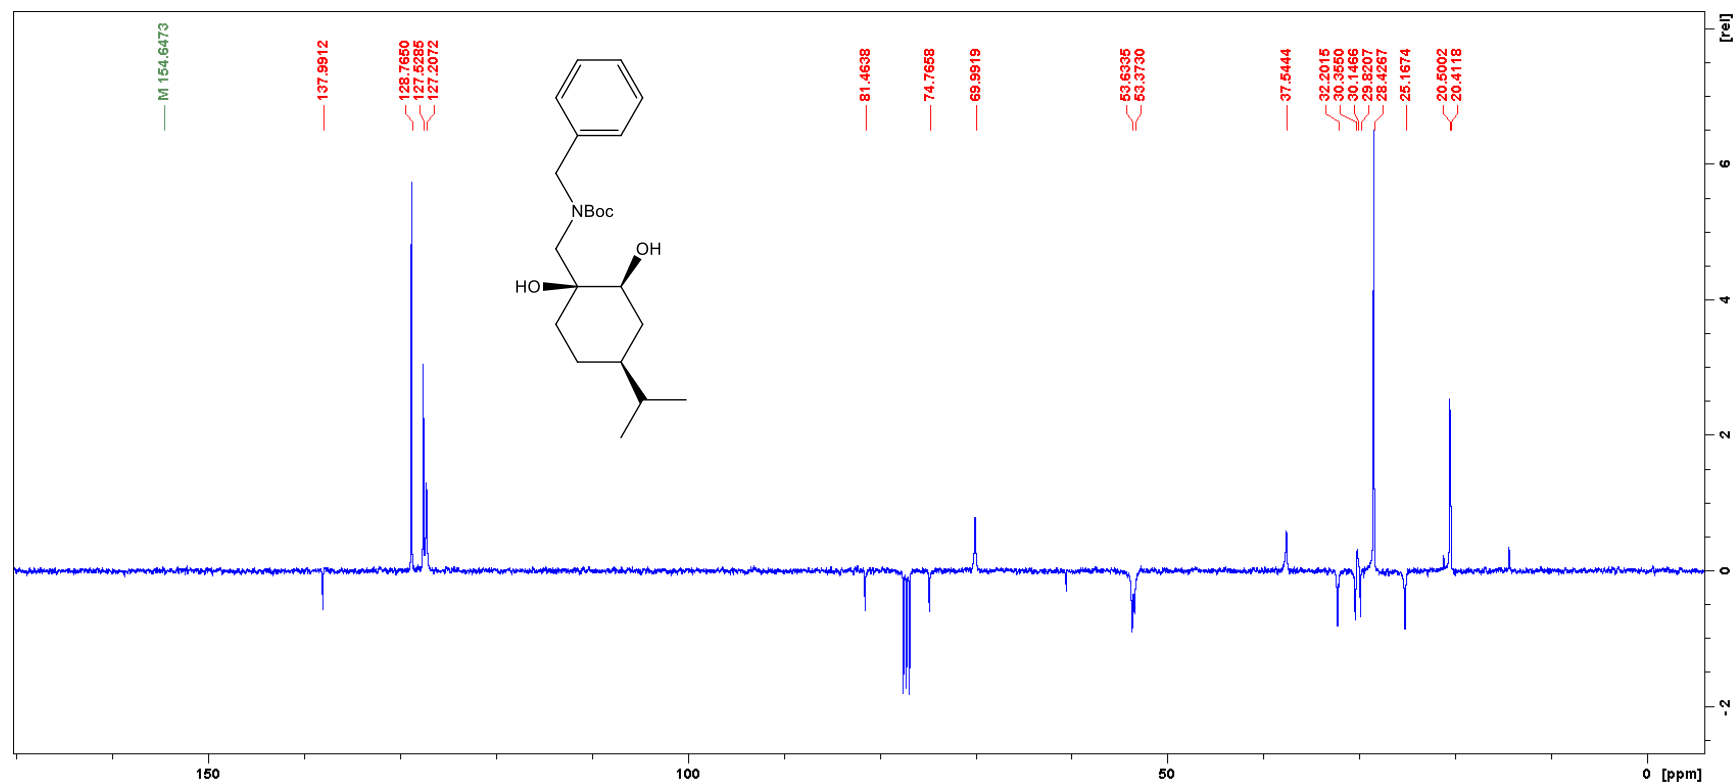



**Figure S 28:  $^1\text{H}$ -NMR of compound *tert*-butyl benzyl(((1*R*,2*R*,4*S*)-1,2-dihydroxy-4-isopropylcyclohexyl)methyl)carbamate **6a****

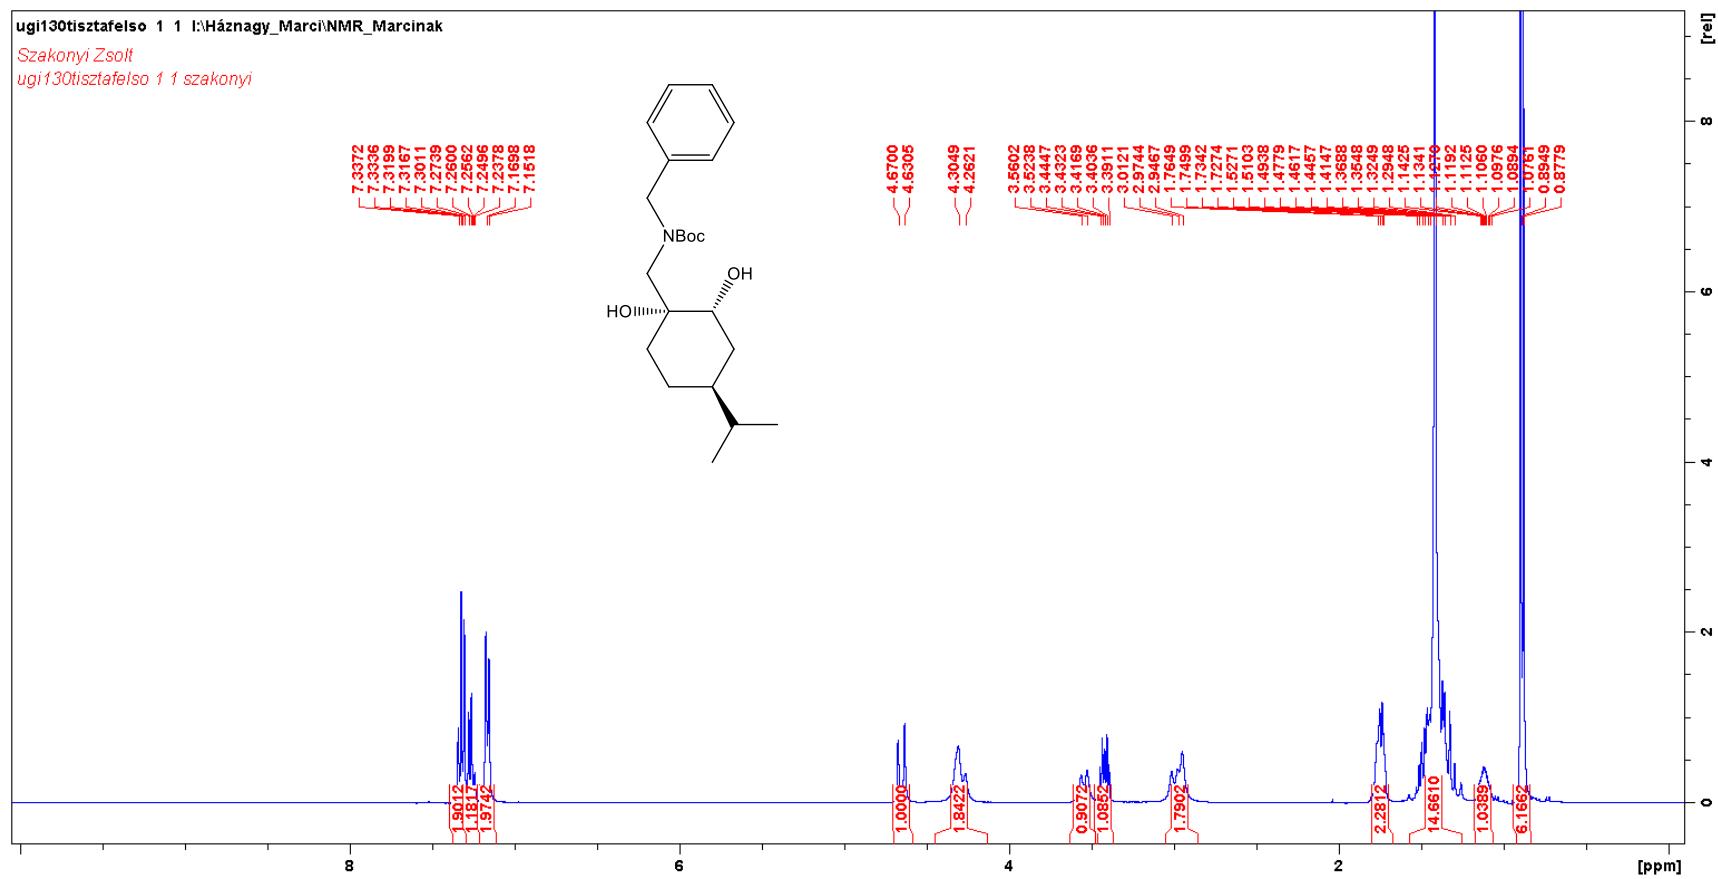

**Figure S 29:**  $^{13}\text{C}$ -NMR of compound *tert*-butyl benzyl(((1*R*,2*R*,4*S*)-1,2-dihydroxy-4-isopropylcyclohexyl)methyl)carbamate **6a**

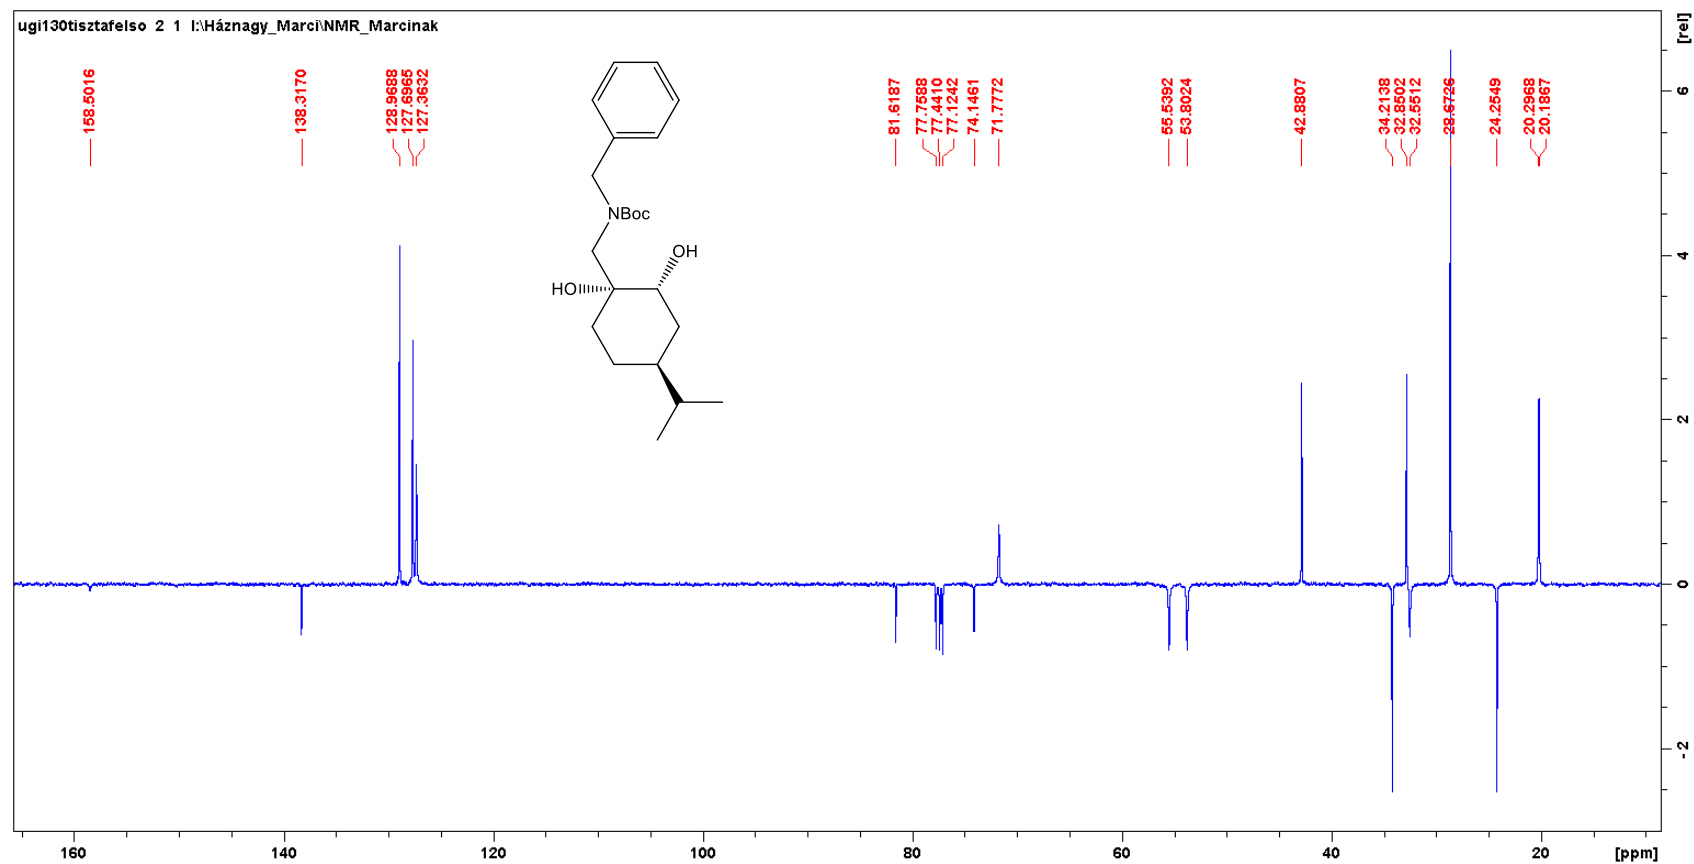

**Figure S 30:  $^1\text{H}$ -NMR of compound *tert*-butyl (((1*S*,2*S*,4*S*)-1,2-dihydroxy-4-isopropylcyclohexyl)methyl)((*S*)-1-phenylethyl)carbamate **5b****

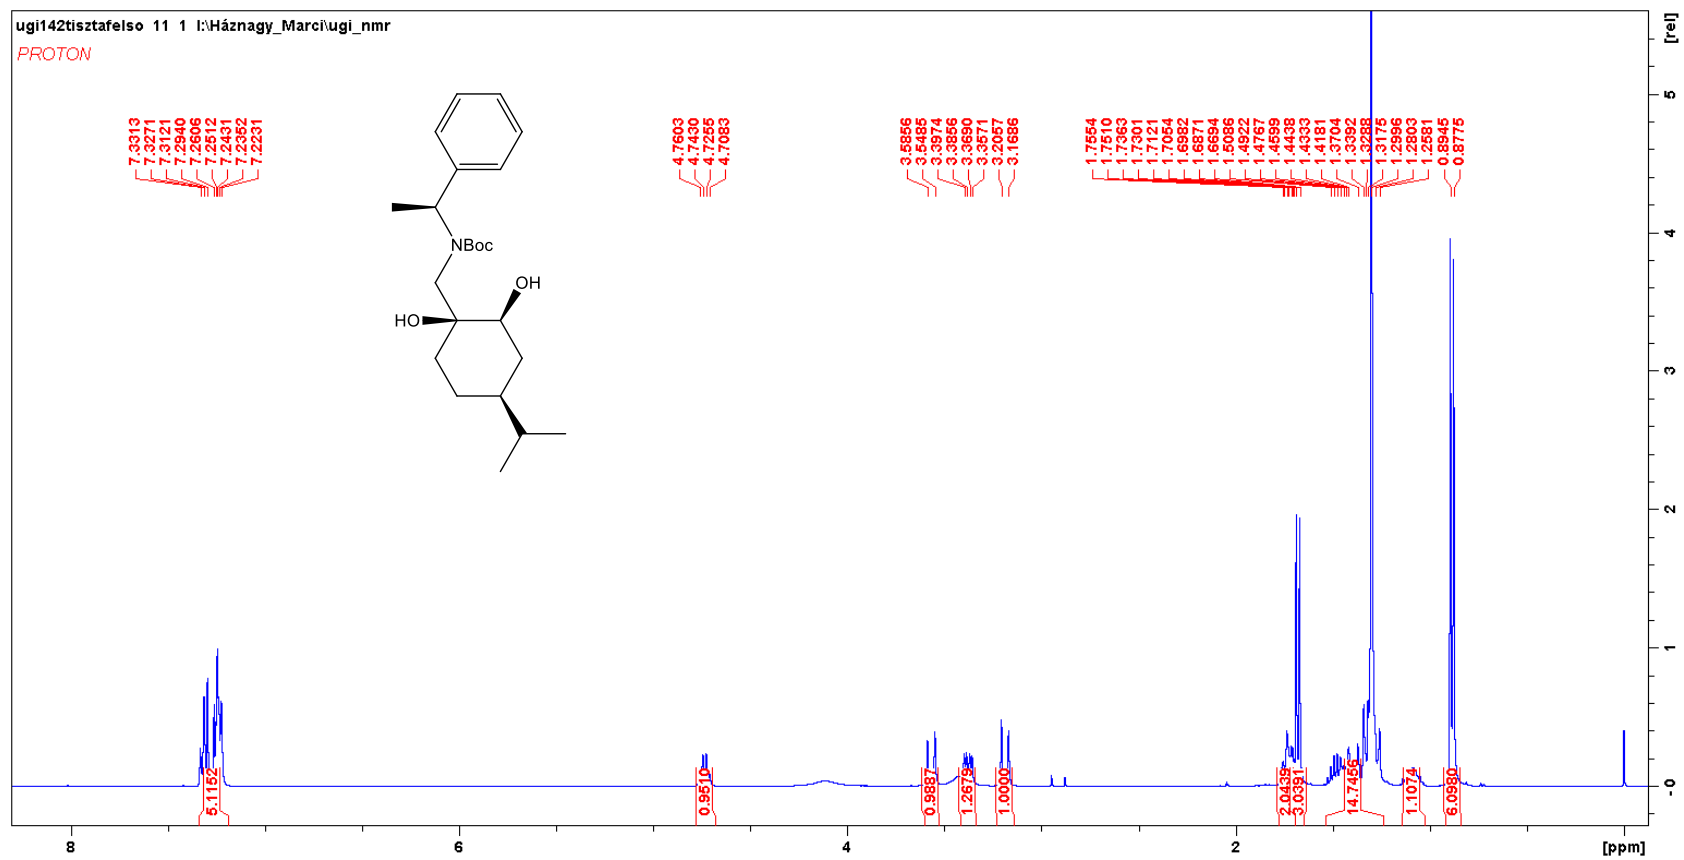

**Figure S 31:**  $^{13}\text{C}$ -NMR of compound *tert*-butyl (((1*S*,2*S*,4*S*)-1,2-dihydroxy-4-isopropylcyclohexyl)methyl)((*S*)-1-phenylethyl)carbamate **5b**

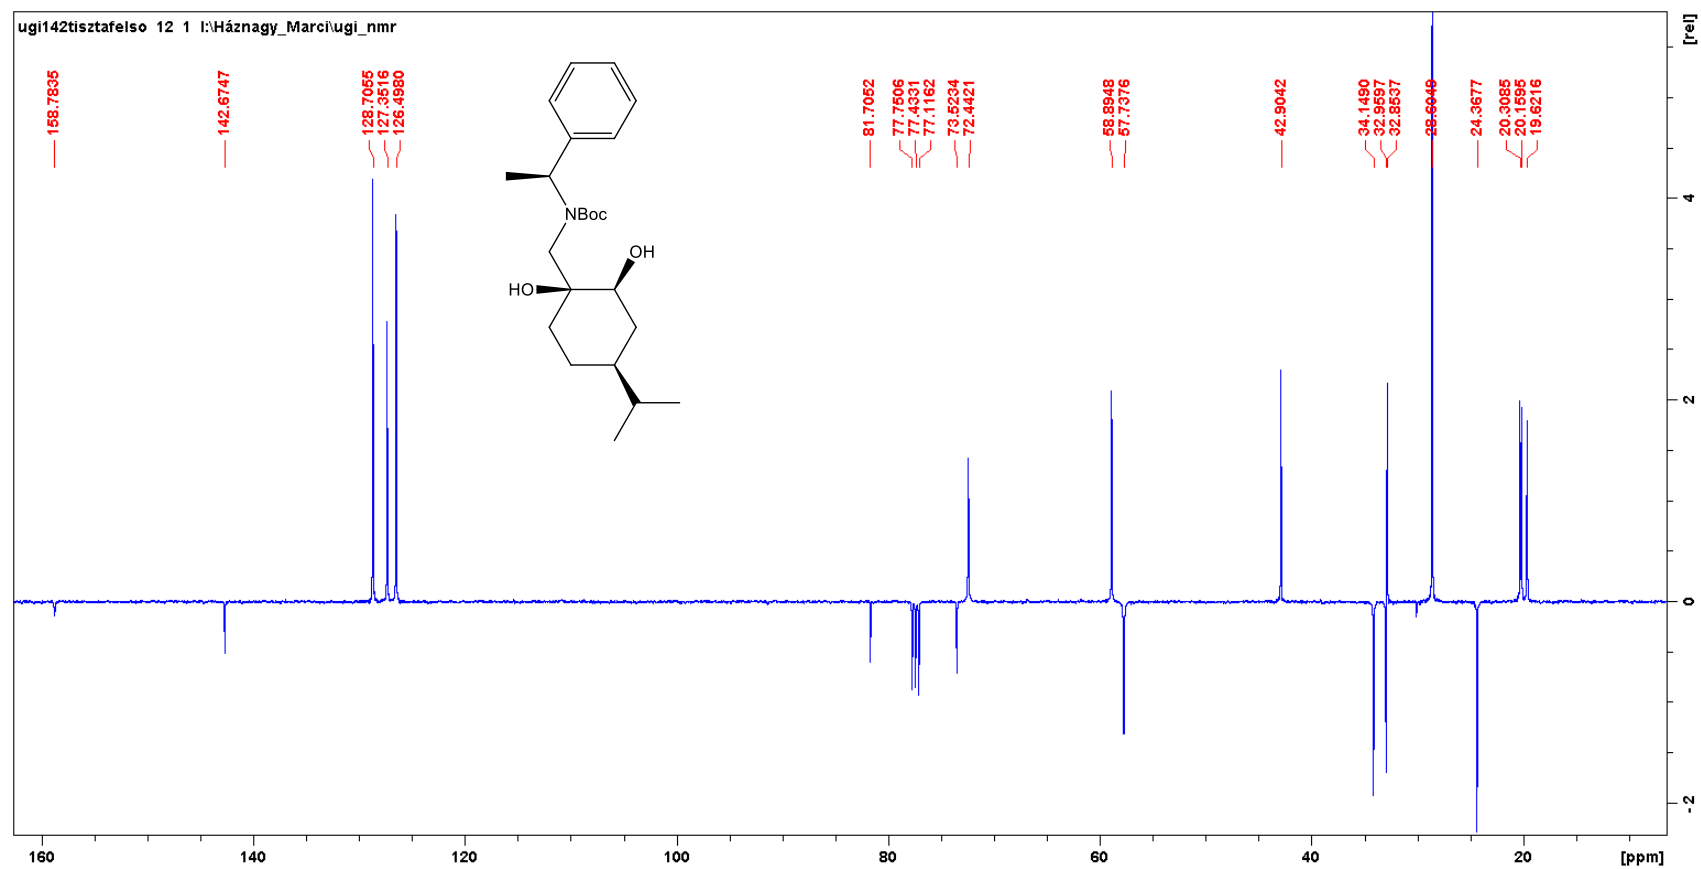

**Figure S 32:  $^1\text{H}$ -NMR of compound *tert*-butyl (((1*R*,2*R*,4*S*)-1,2-dihydroxy-4-isopropylcyclohexyl)methyl)((*S*)-1-phenylethyl)carbamate **6b****

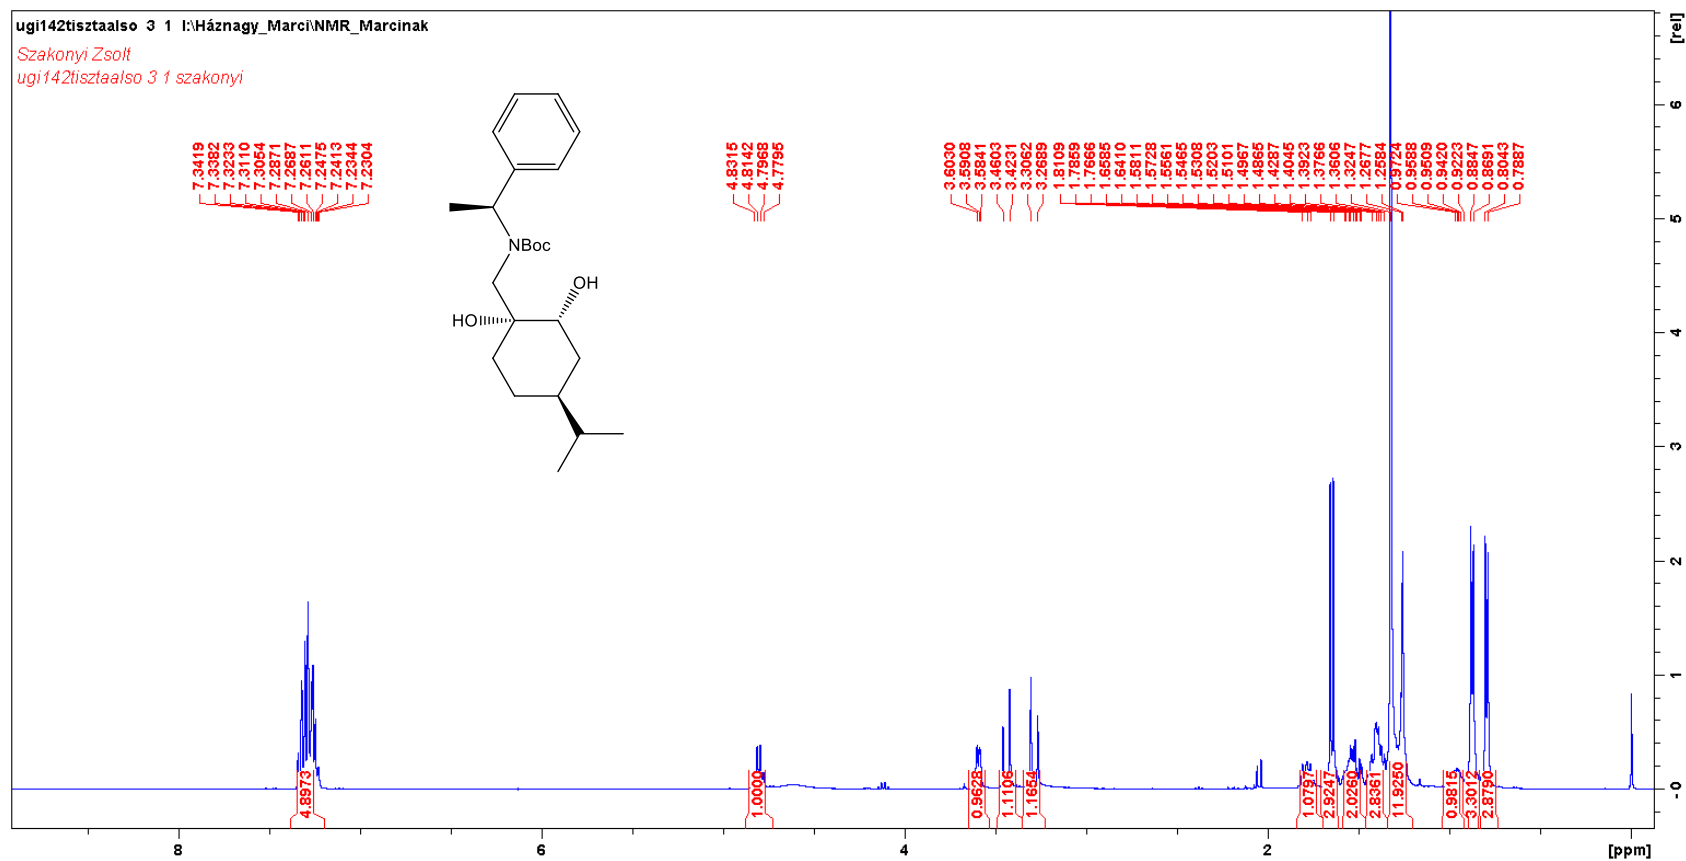

**Figure S 33:**  $^{13}\text{C}$ -NMR of compound *tert*-butyl (((1*R*,2*R*,4*S*)-1,2-dihydroxy-4-isopropylcyclohexyl)methyl)((*S*)-1-phenylethyl)carbamate **6b**

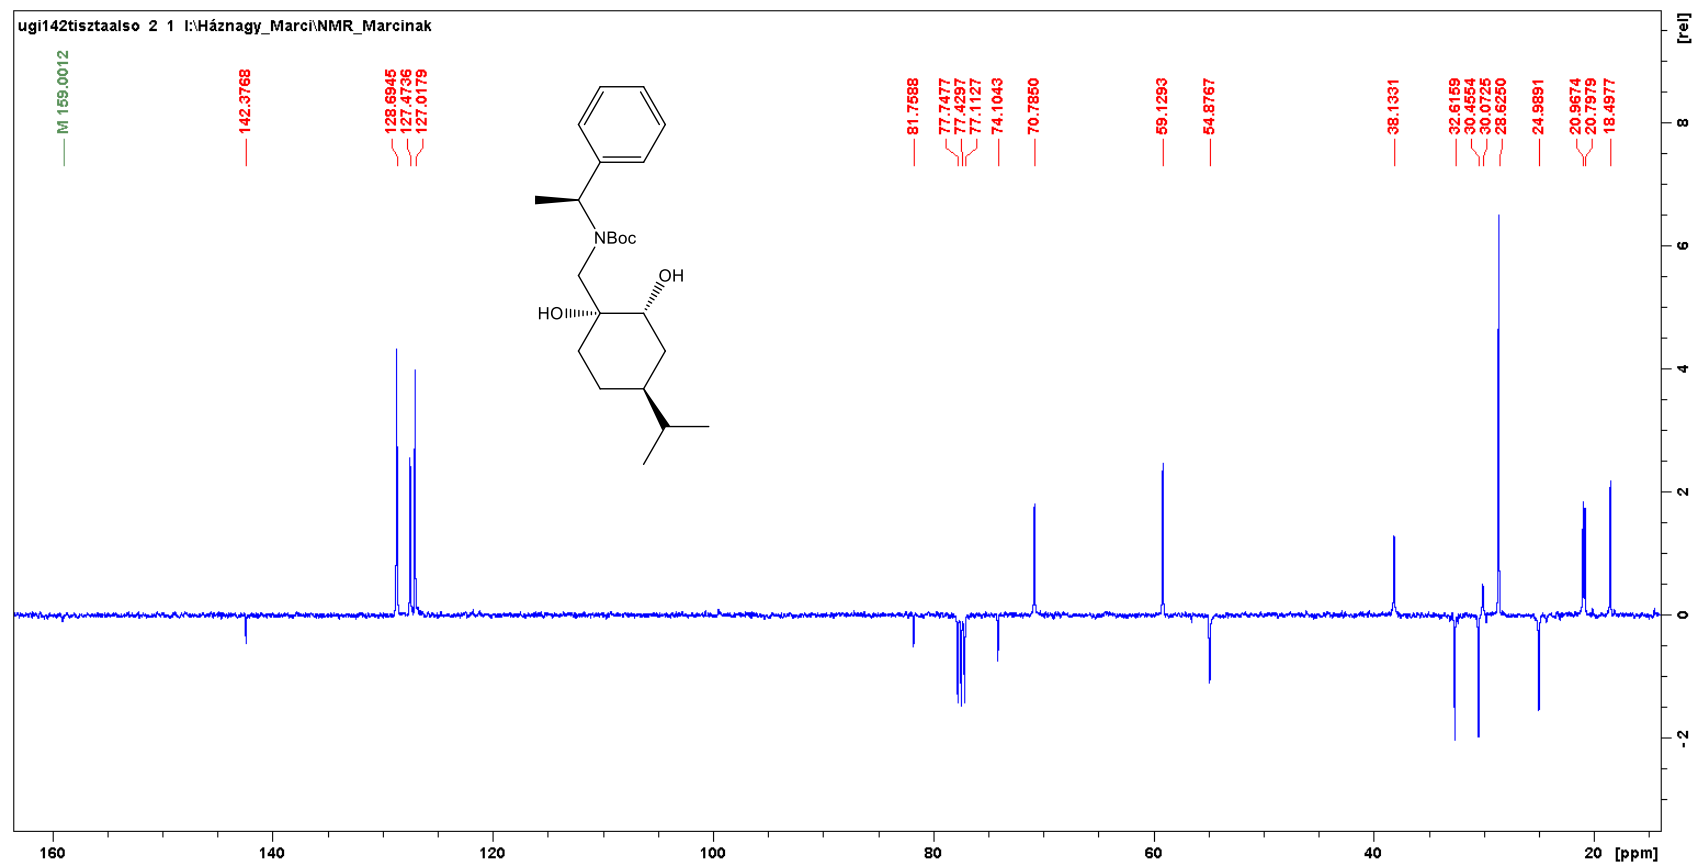

**Figure S 34:  $^1\text{H}$ -NMR of compound *tert*-butyl (((1*S*,2*S*,4*S*)-1,2-dihydroxy-4-isopropylcyclohexyl)methyl)((*R*)-1-phenylethyl)carbamate **5c****

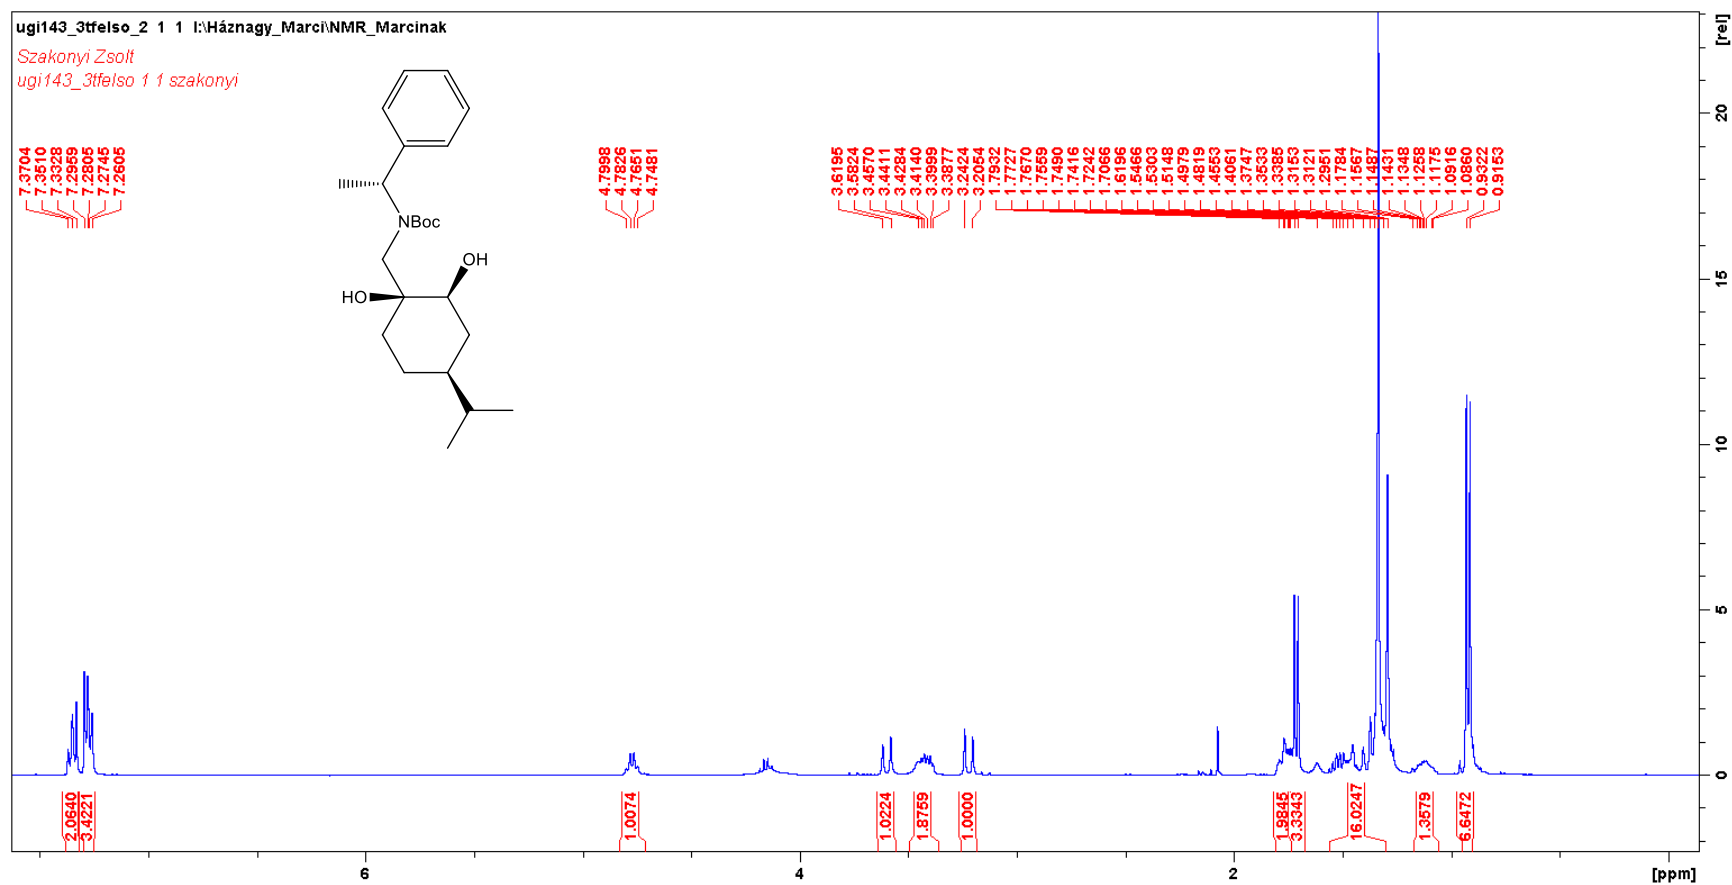

**Figure S 35:**  $^{13}\text{C}$ -NMR of compound *tert*-butyl (((1*S*,2*S*,4*S*)-1,2-dihydroxy-4-isopropylcyclohexyl)methyl)((*R*)-1-phenylethyl)carbamate **5c**

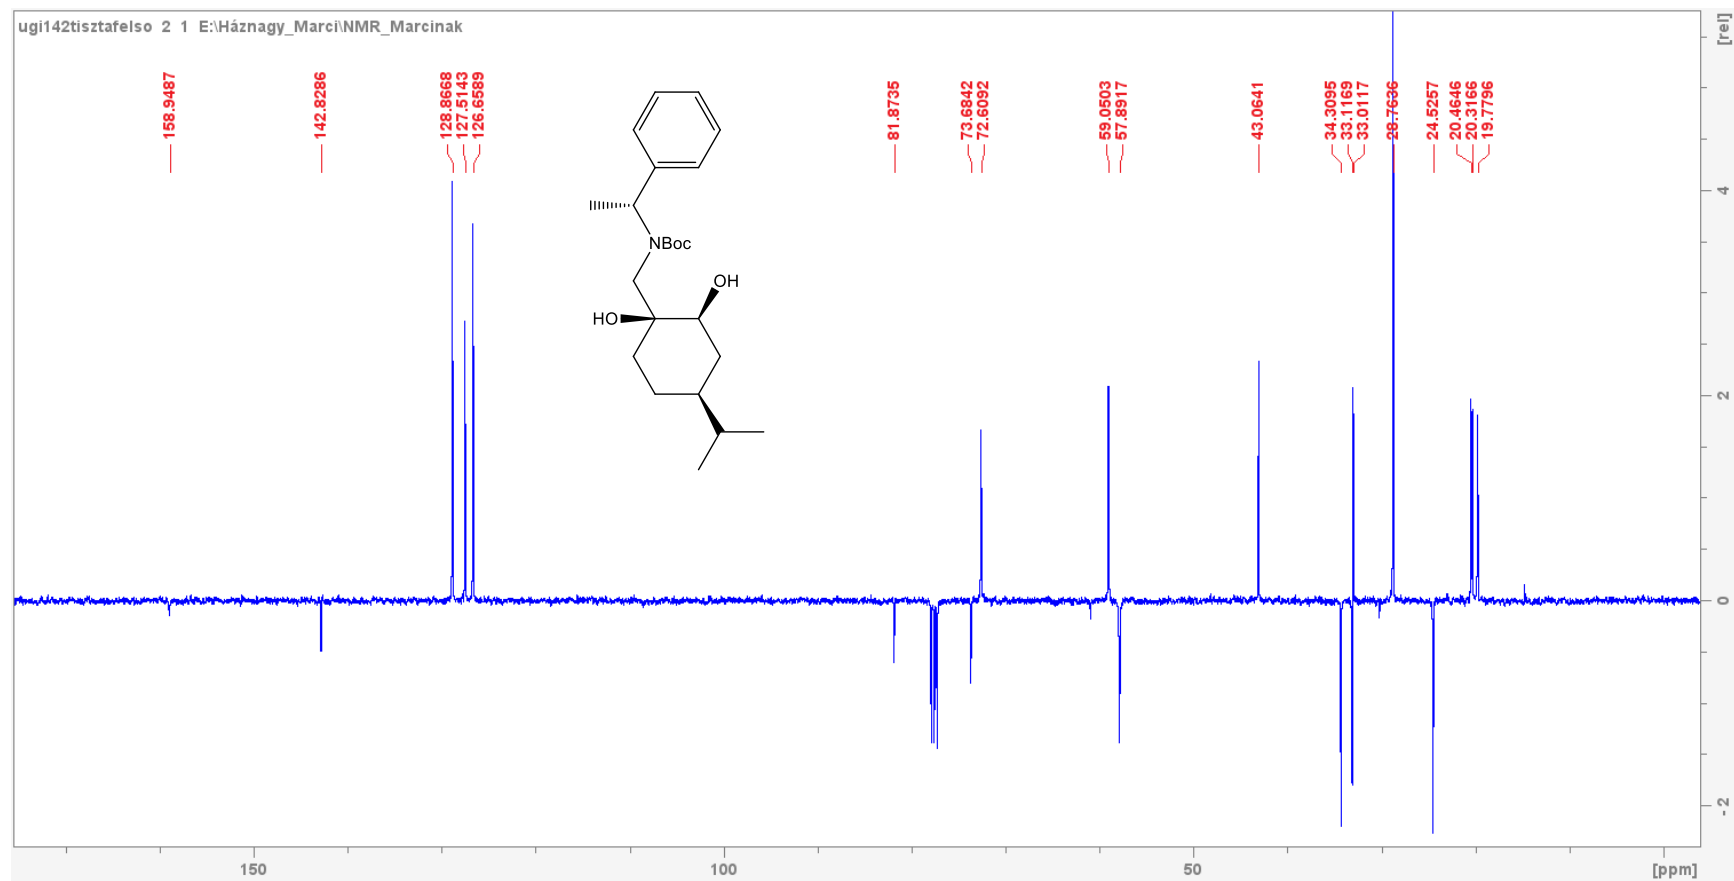



**Figure S 36: <sup>1</sup>H-NMR of compound *tert*-butyl (((1*R*,2*R*,4*S*)-1,2-dihydroxy-4-isopropylcyclohexyl)methyl)((*R*)-1-phenylethyl)carbamate **6c****

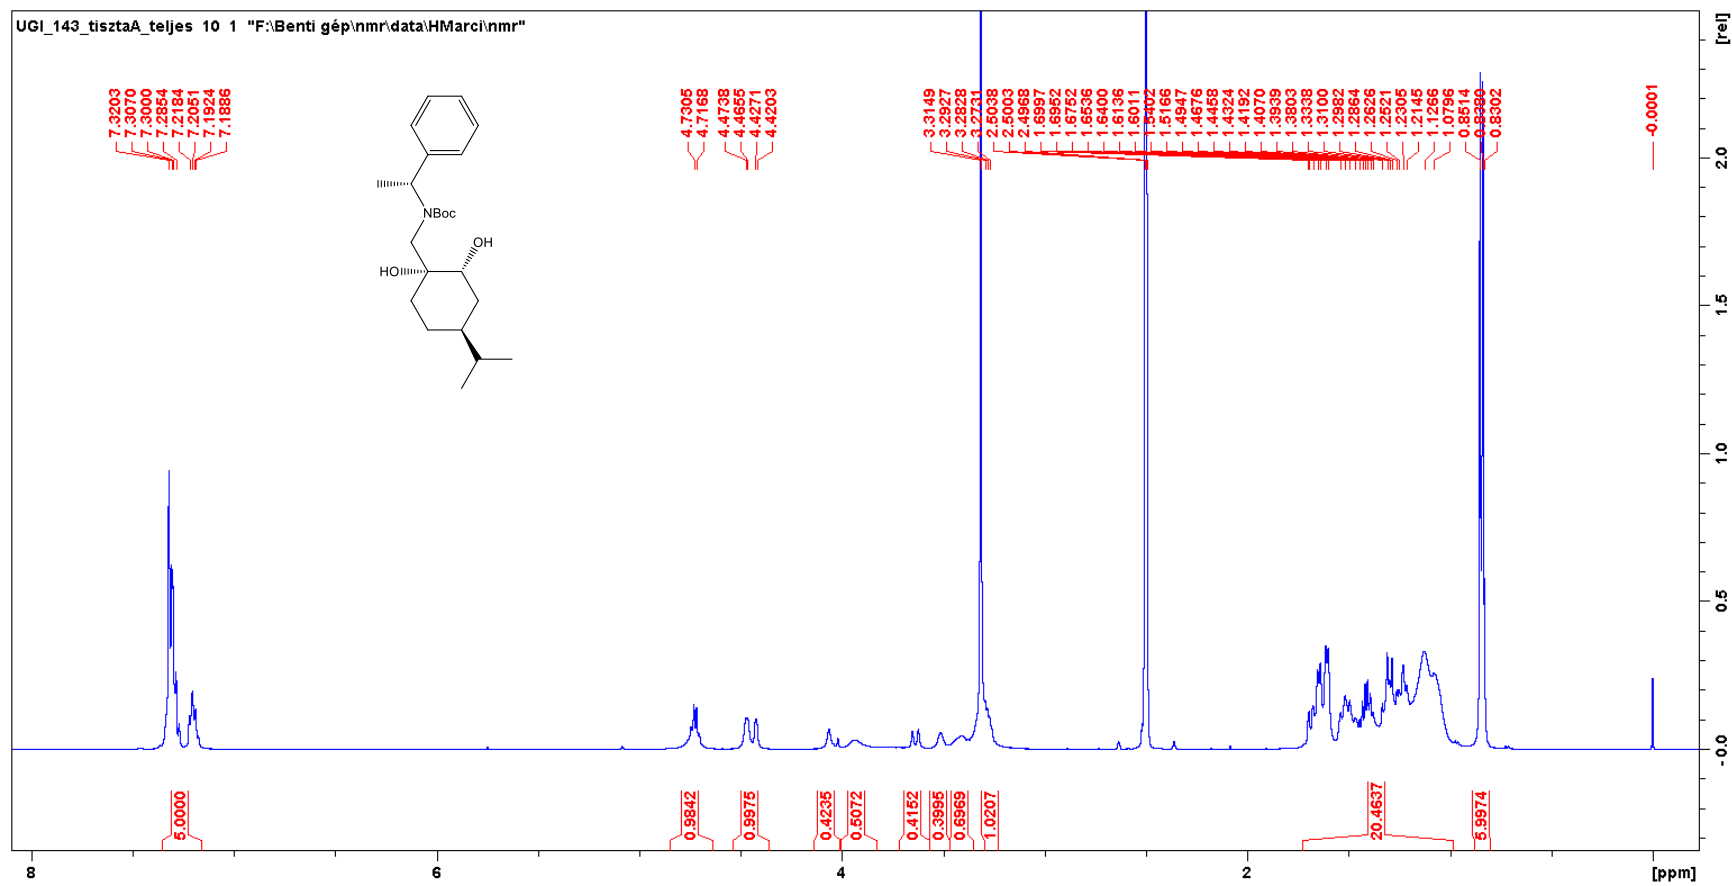

**Figure S 37:**  $^{13}\text{C}$ -NMR of compound *tert*-butyl (((1*R*,2*R*,4*S*)-1,2-dihydroxy-4-isopropylcyclohexyl)methyl)((*R*)-1-phenylethyl)carbamate **6c**

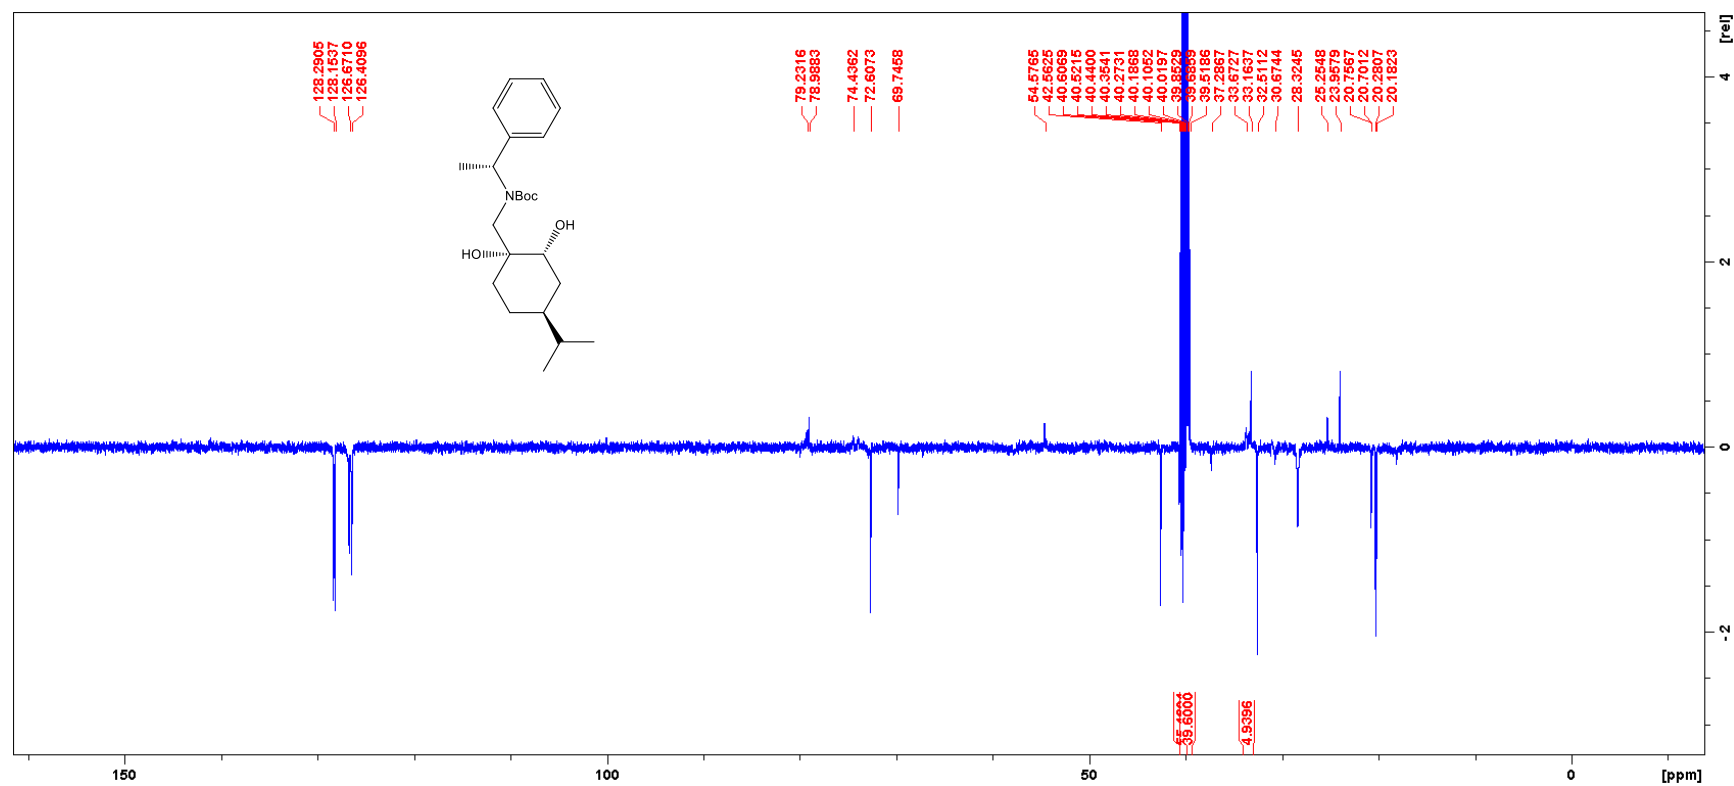

**Figure S 38: HSQC NMR of compound** *tert*-butyl (((1*R*,2*R*,4*S*)-1,2-dihydroxy-4-isopropylcyclohexyl)methyl)((*R*)-1-phenylethyl)carbamate **6c**

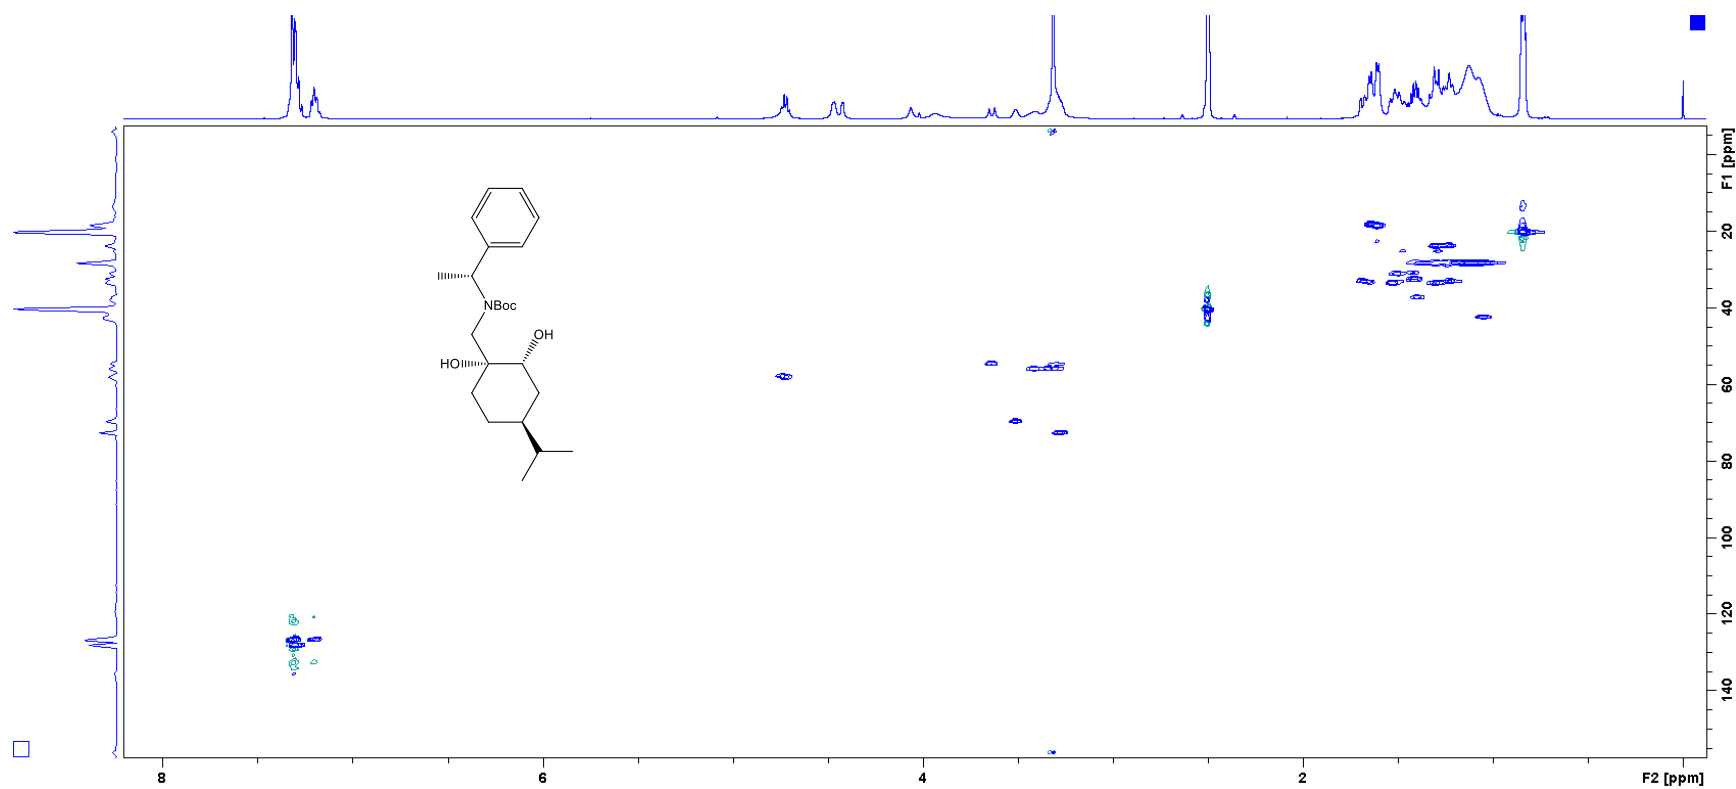

**Figure S 39: HMBC NMR of compound** *tert*-butyl (((1*R*,2*R*,4*S*)-1,2-dihydroxy-4-isopropylcyclohexyl)methyl)((*R*)-1-phenylethyl)carbamate **6c**

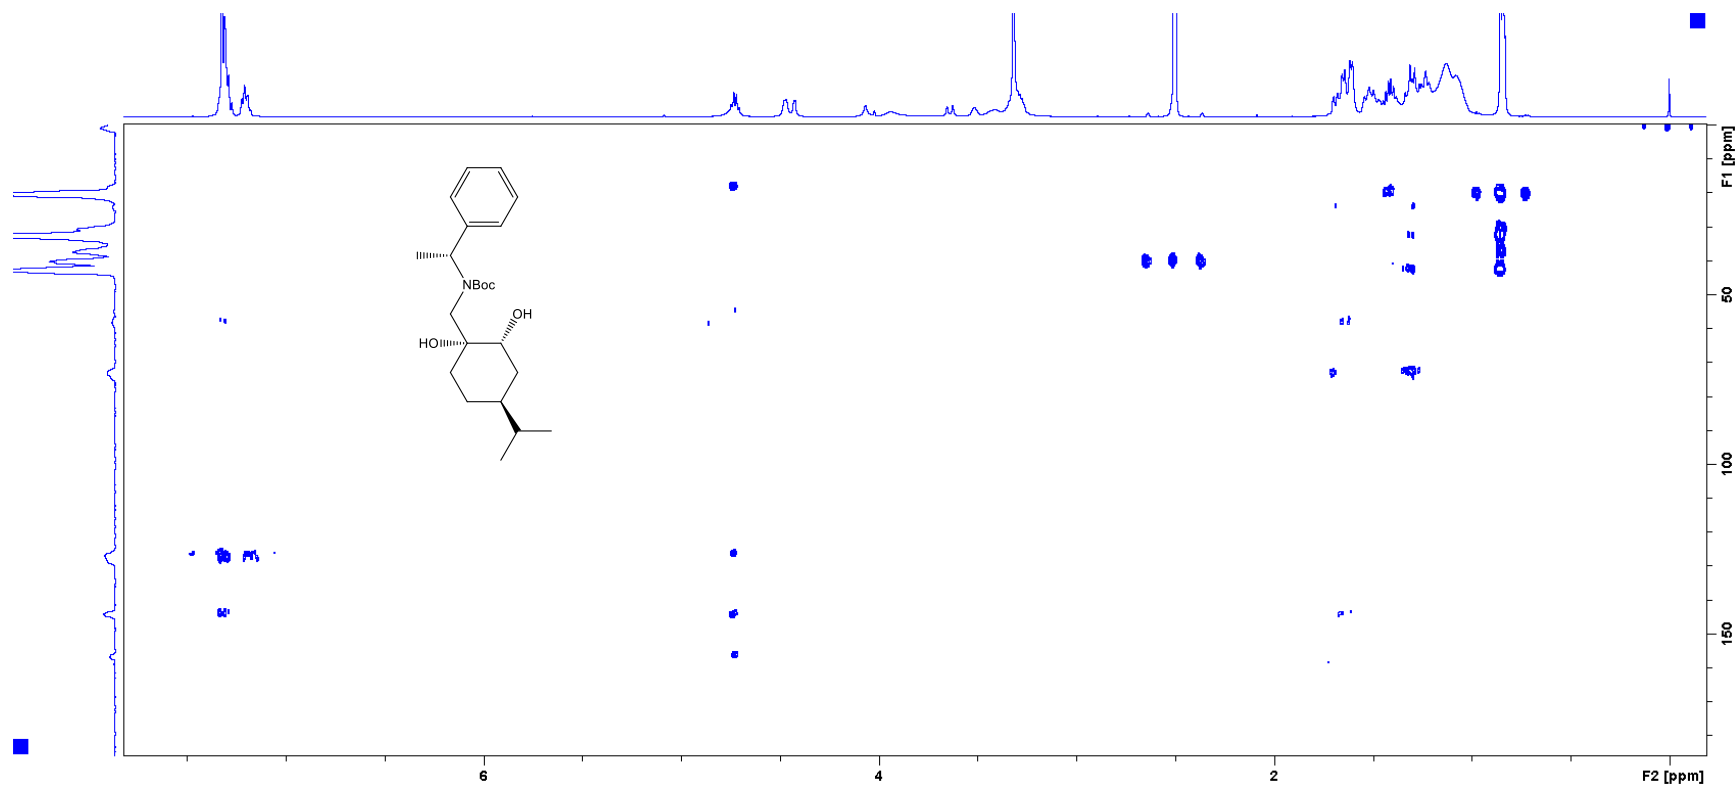

**Figure S 40:**  $^1\text{H}$ -NMR of compound (1*S*,2*S*,4*S*)-1-((benzylamino)methyl)-4-isopropylcyclohexane-1,2-diol **7a**

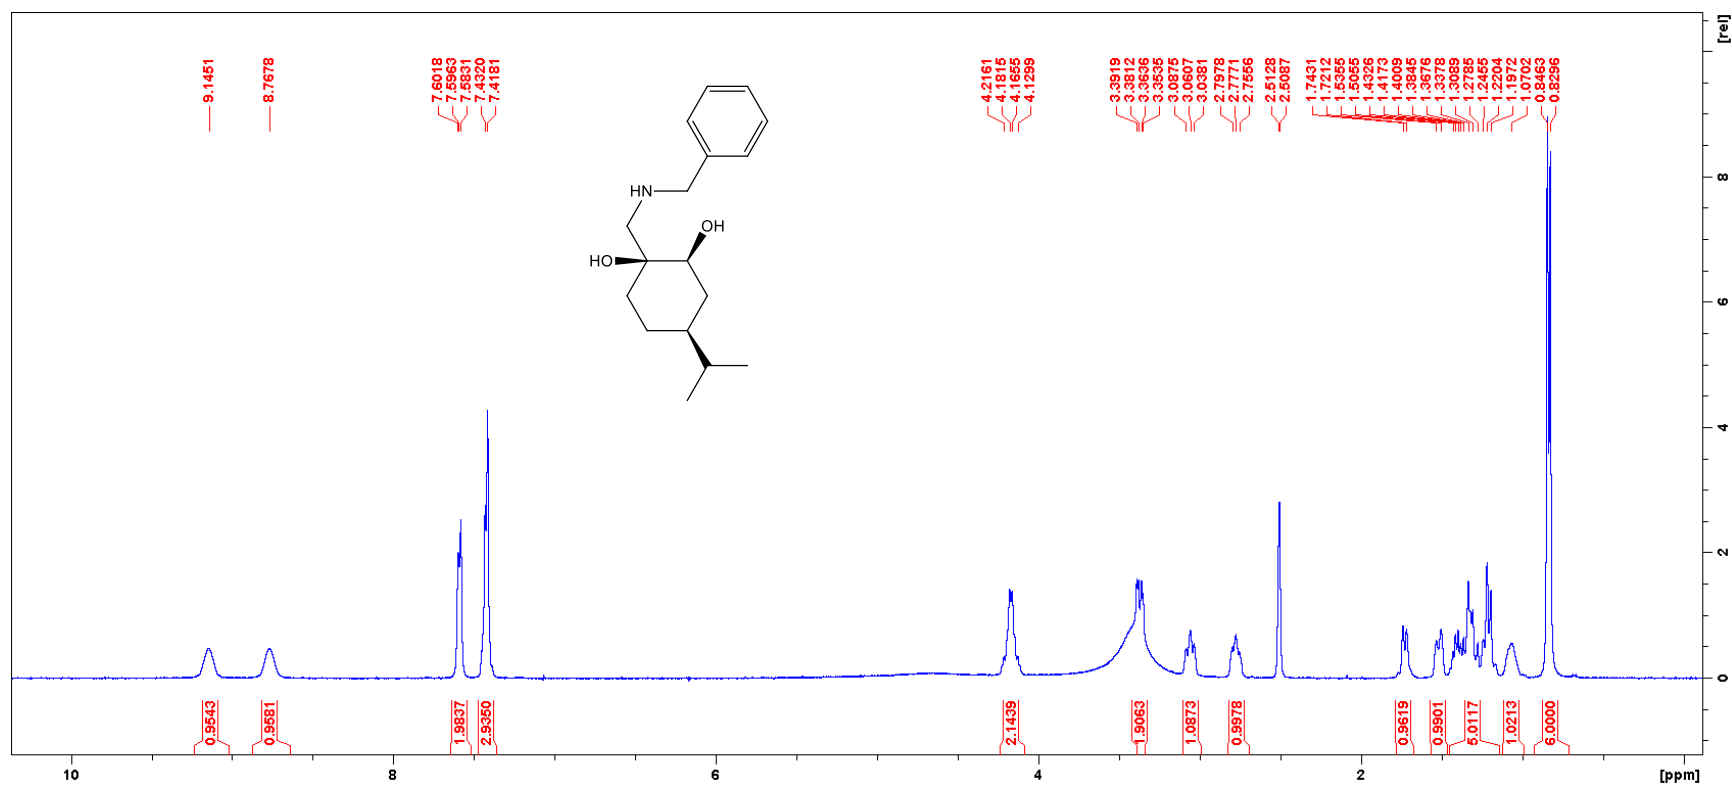

**Figure S 41:**  $^{13}\text{C}$ -NMR of compound (1*S*,2*S*,4*S*)-1-((benzylamino)methyl)-4-isopropylcyclohexane-1,2-diol **7a**

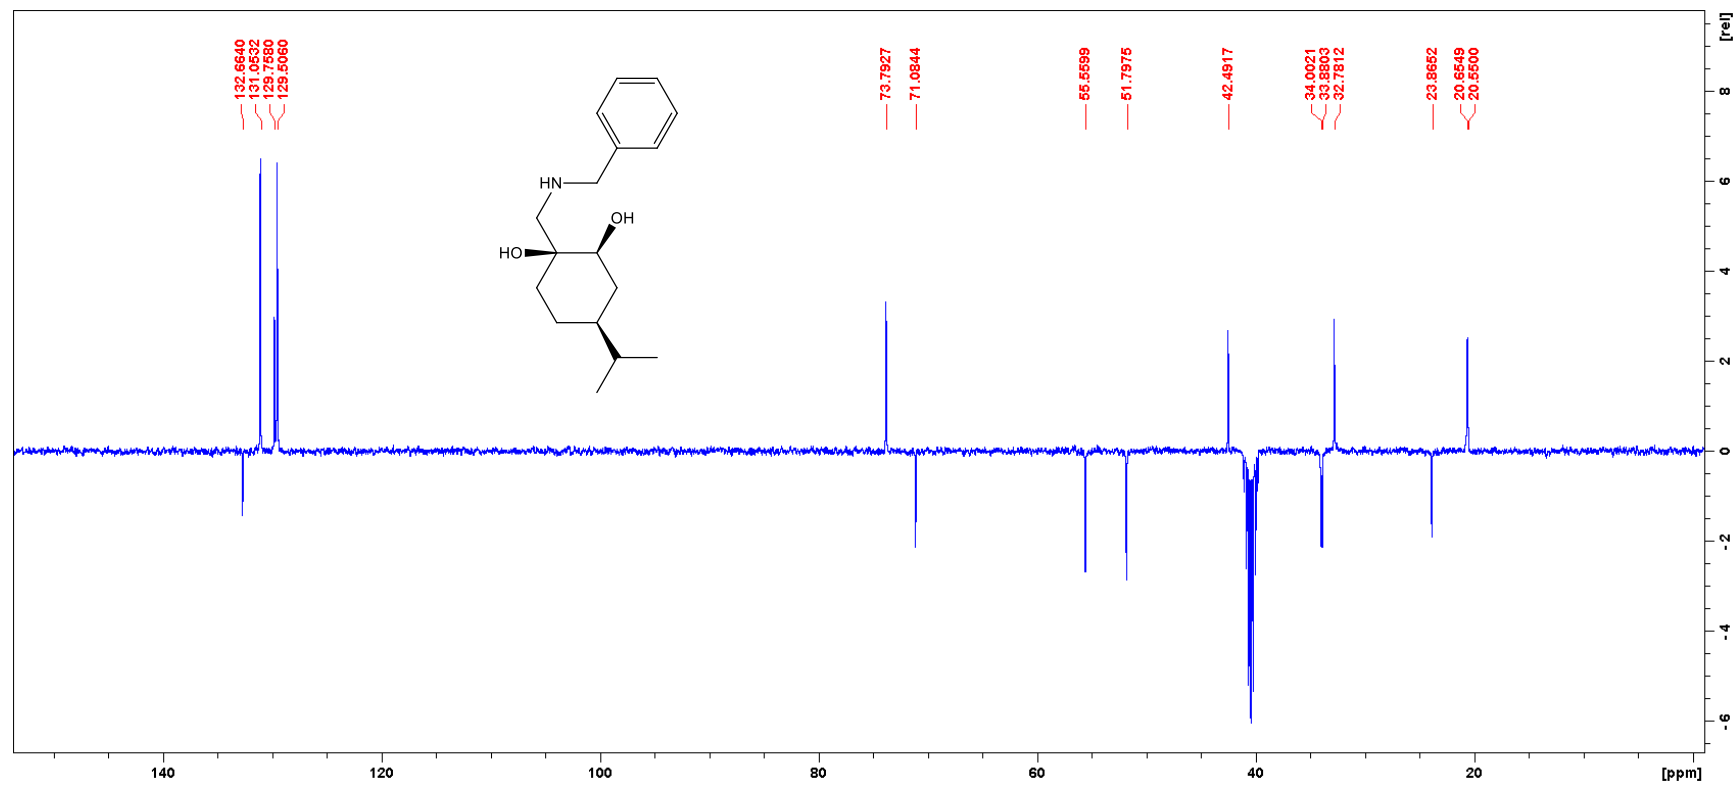

**Figure S 42:** COSY NMR of compound (1*S*,2*S*,4*S*)-1-((benzylamino)methyl)-4-isopropylcyclohexane-1,2-diol hydrochloride **7a**

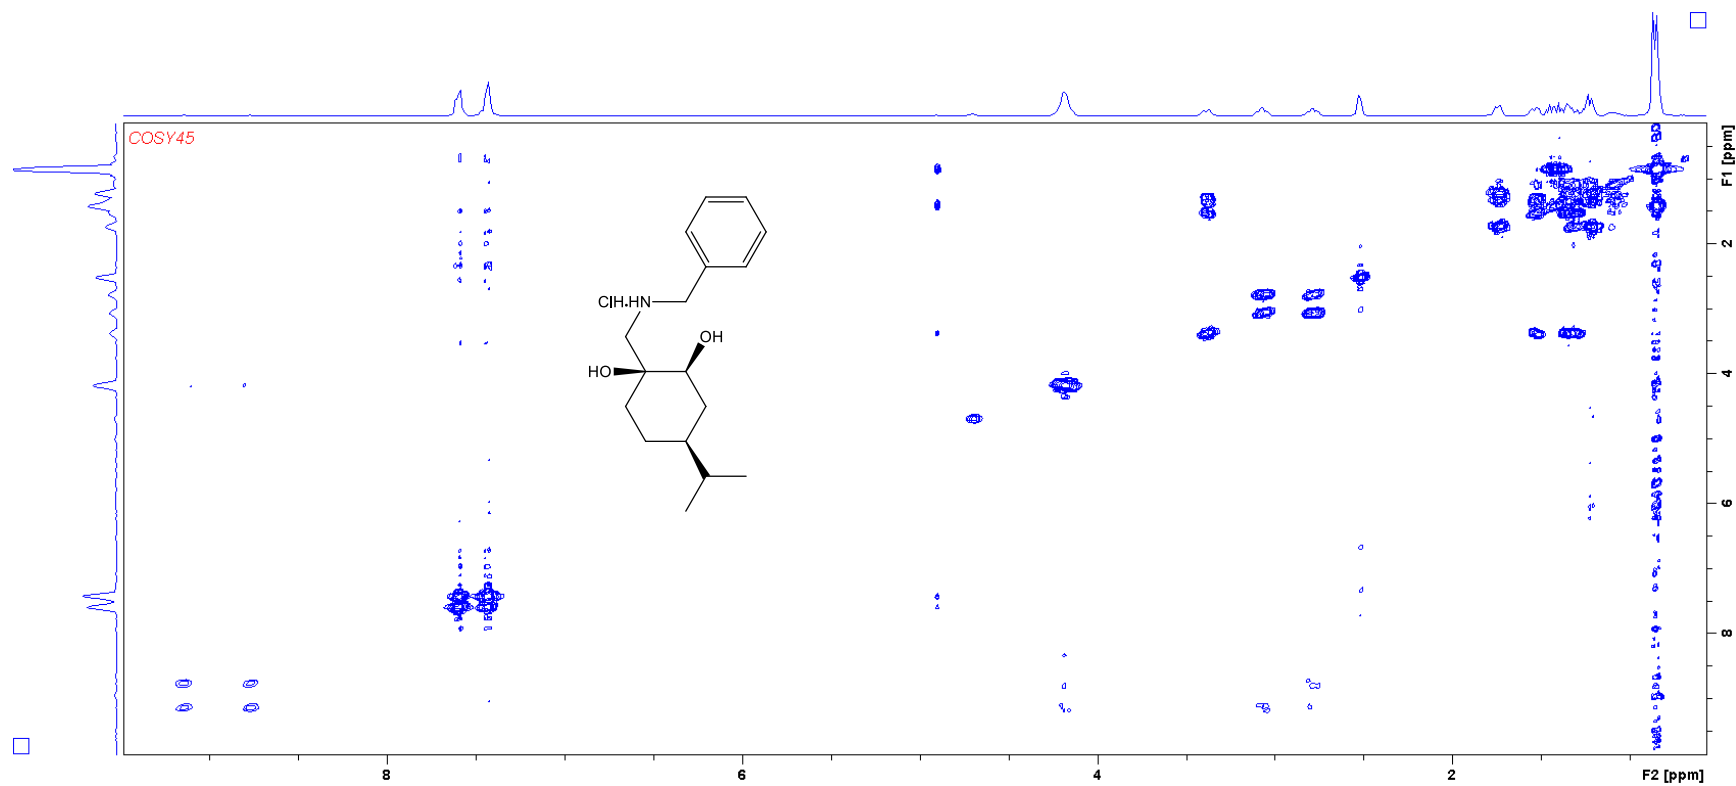

**Figure S 43:** NOESY NMR of compound (1*S*,2*S*,4*S*)-1-((benzylamino)methyl)-4-isopropylcyclohexane-1,2-diol hydrochloride **7a**

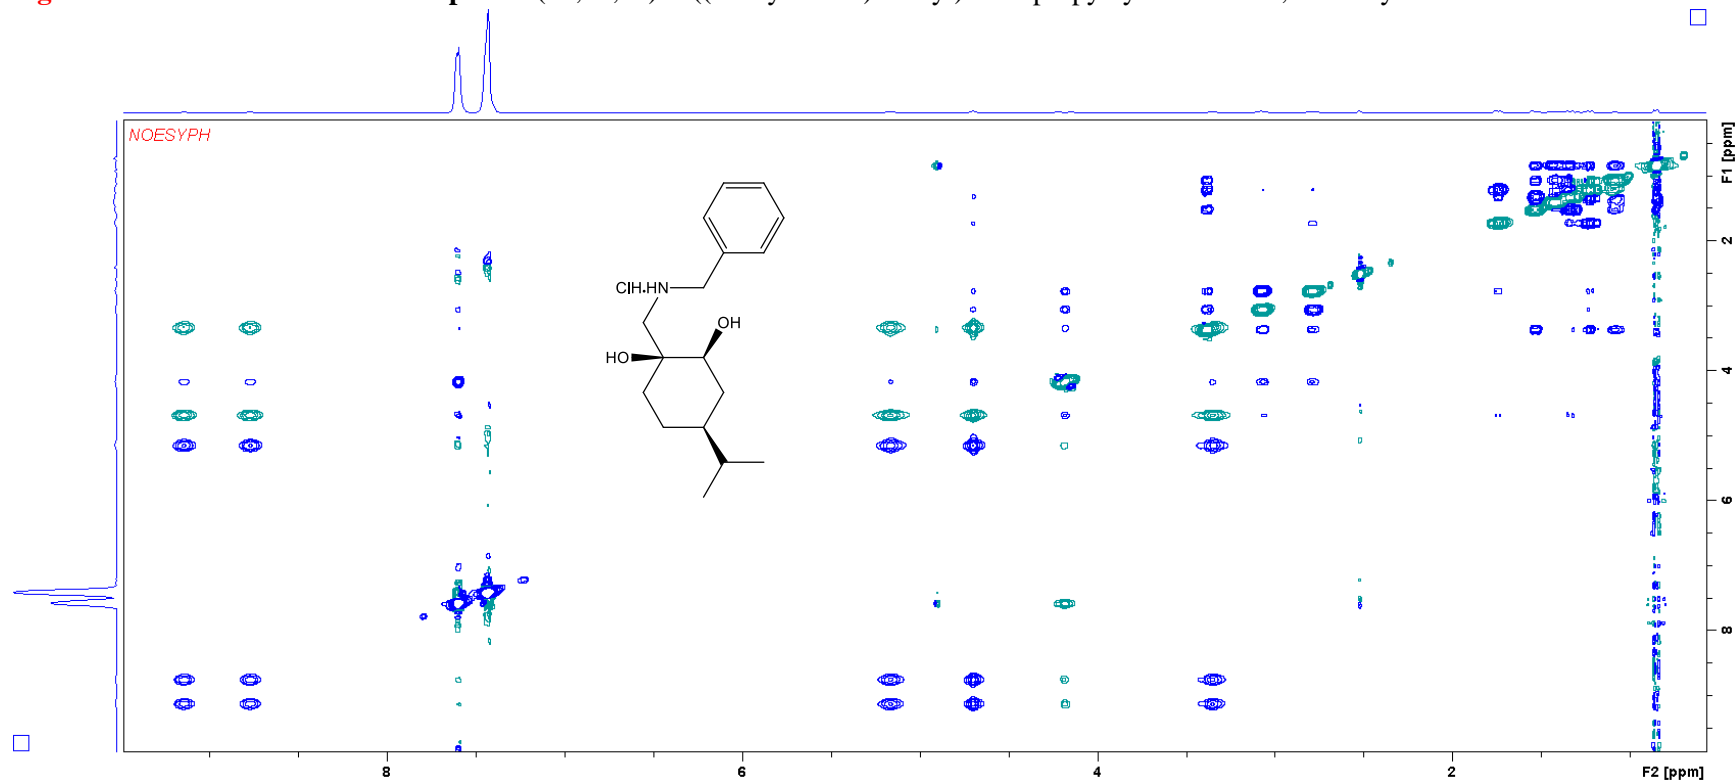



**Figure S 44: HSQC NMR of compound (1*S*,2*S*,4*S*)-1-((benzylamino)methyl)-4-isopropylcyclohexane-1,2-diol hydrochloride **7a****

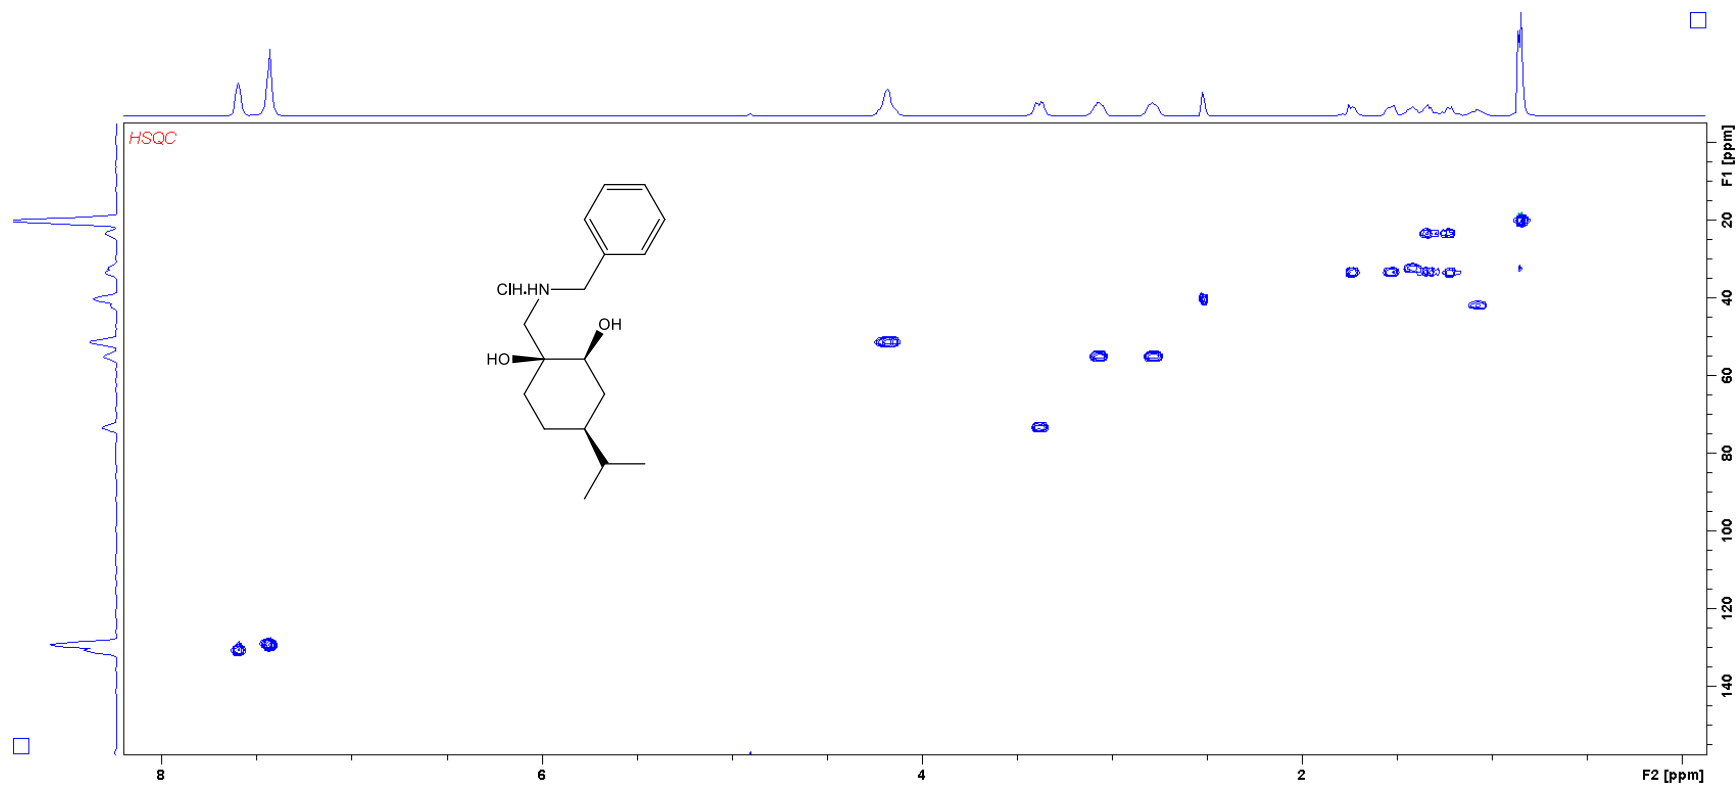

**Figure S 45:  $^1\text{H}$ -NMR of compound (1*S*,2*S*,4*S*)-4-isopropyl-1-(((*S*)-1-phenylethyl)amino)methyl)cyclohexane-1,2-diol hydrochloride **7b****

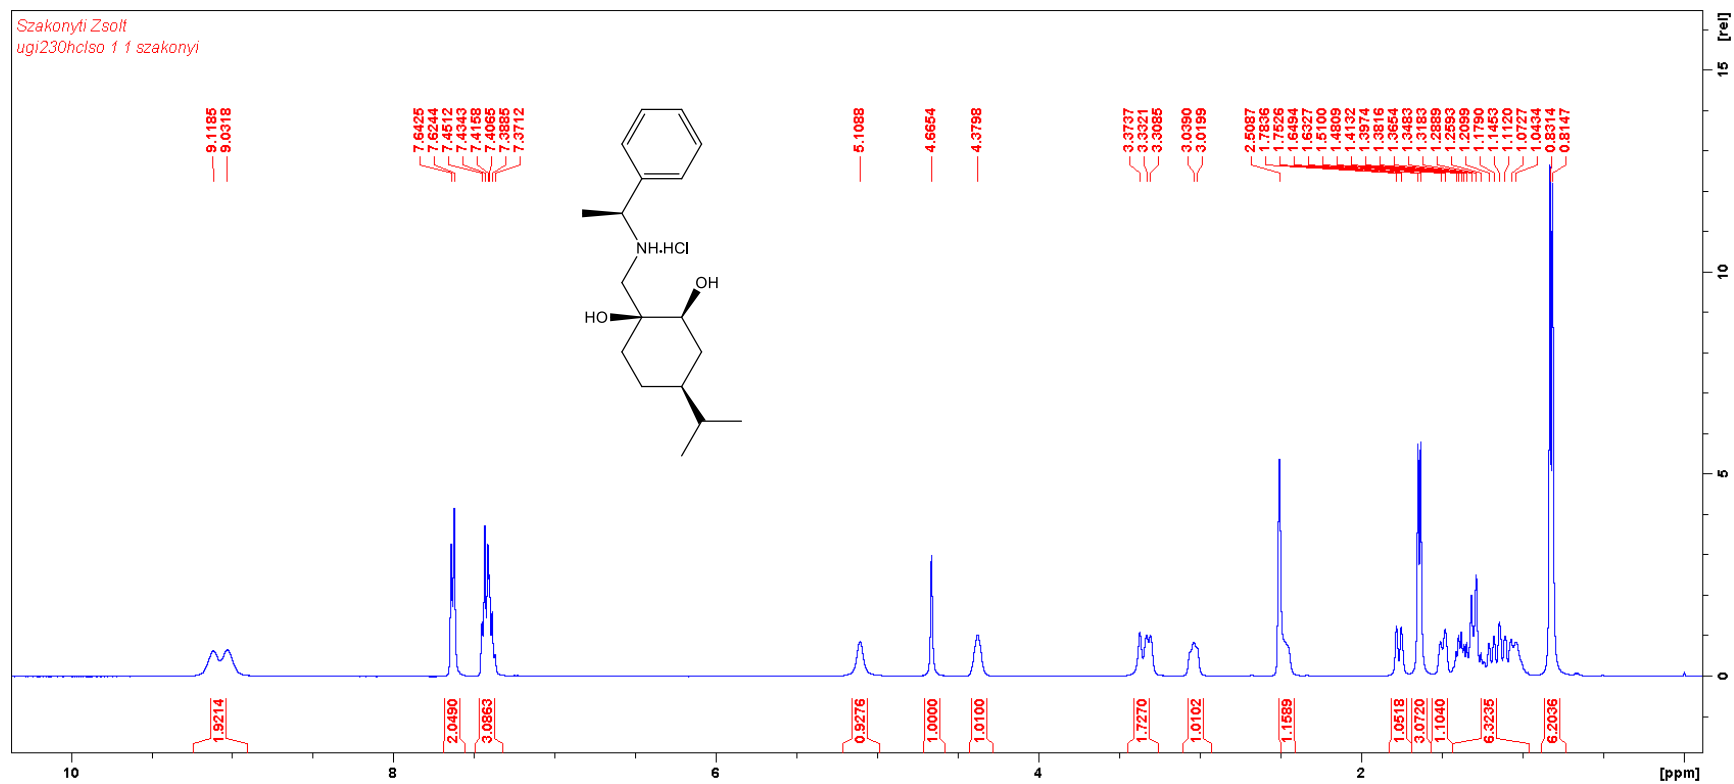

**Figure S 46:  $^{13}\text{C}$ -NMR of compound (1*S*,2*S*,4*S*)-4-isopropyl-1-((((*S*)-1-phenylethyl)amino)methyl)cyclohexane-1,2-diol hydrochloride **7b****

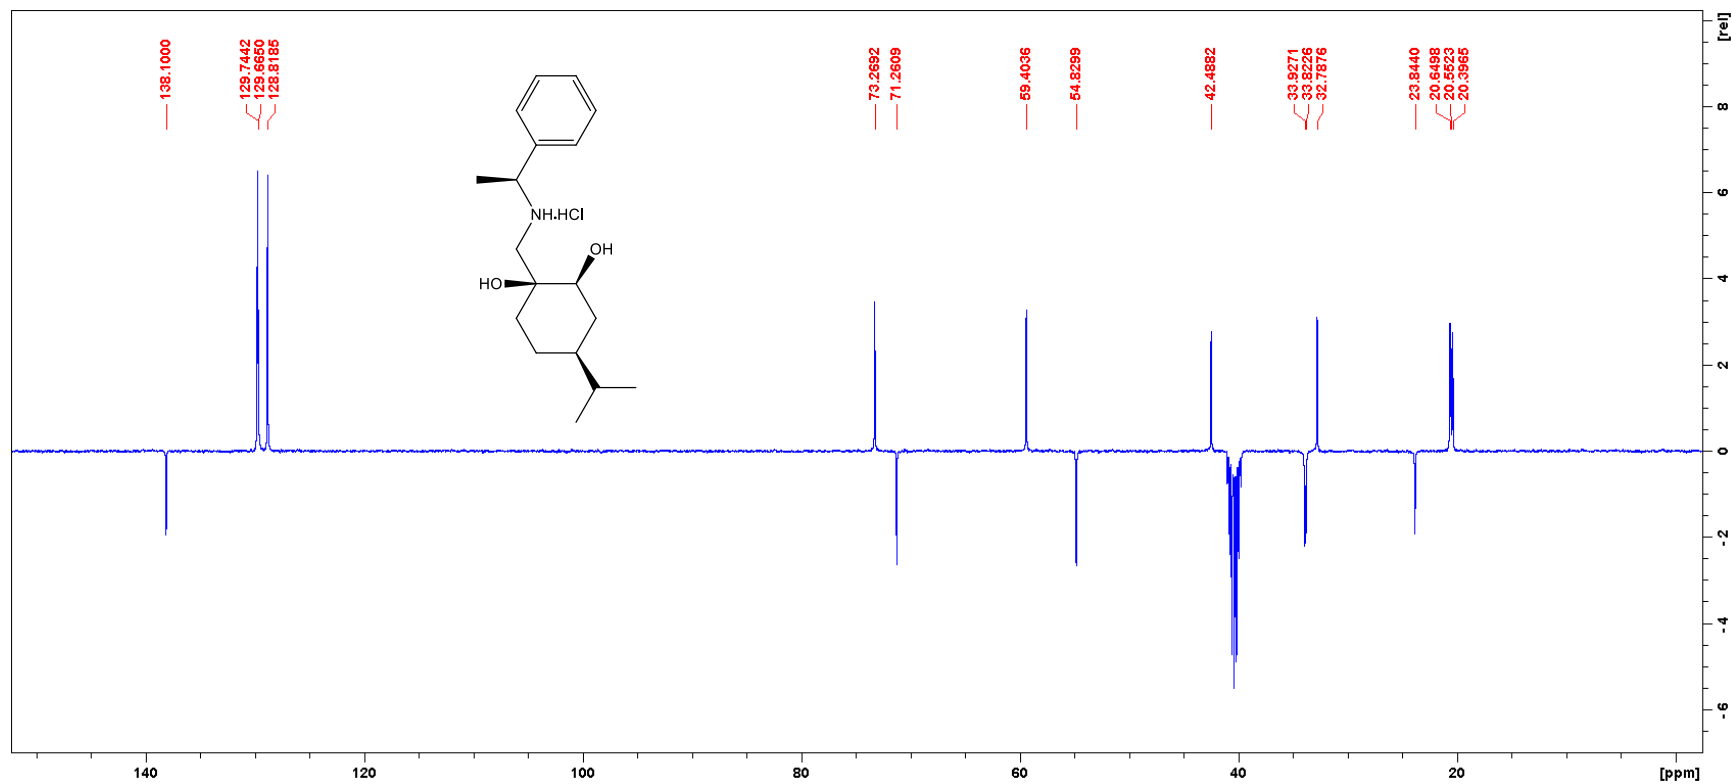

**Figure S 47:  $^1\text{H}$ -NMR of compound (1*S*,2*S*,4*S*)-4-Isopropyl-1-(((*R*)-1-phenylethyl)amino)methyl)cyclohexane-1,2-diol **7c****

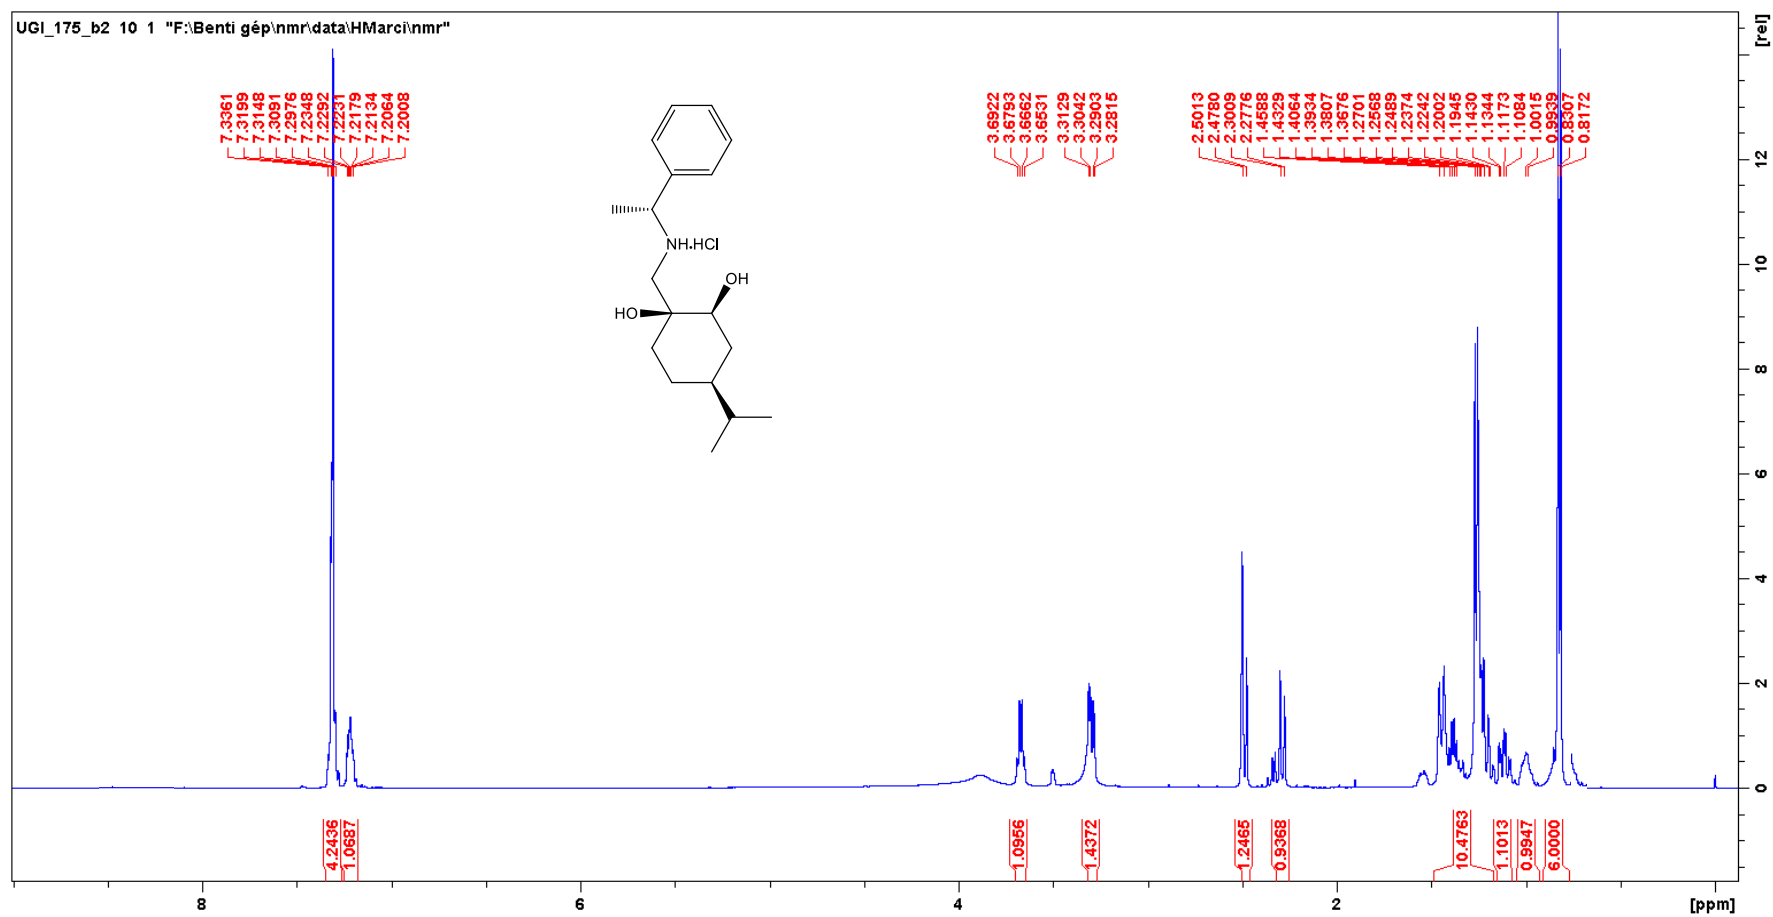

**Figure S 48:**  $^{13}\text{C}$ -NMR of compound (1*S*,2*S*,4*S*)-4-Isopropyl-1-((((*R*)-1-phenylethyl)amino)methyl)cyclohexane-1,2-diol **7c**

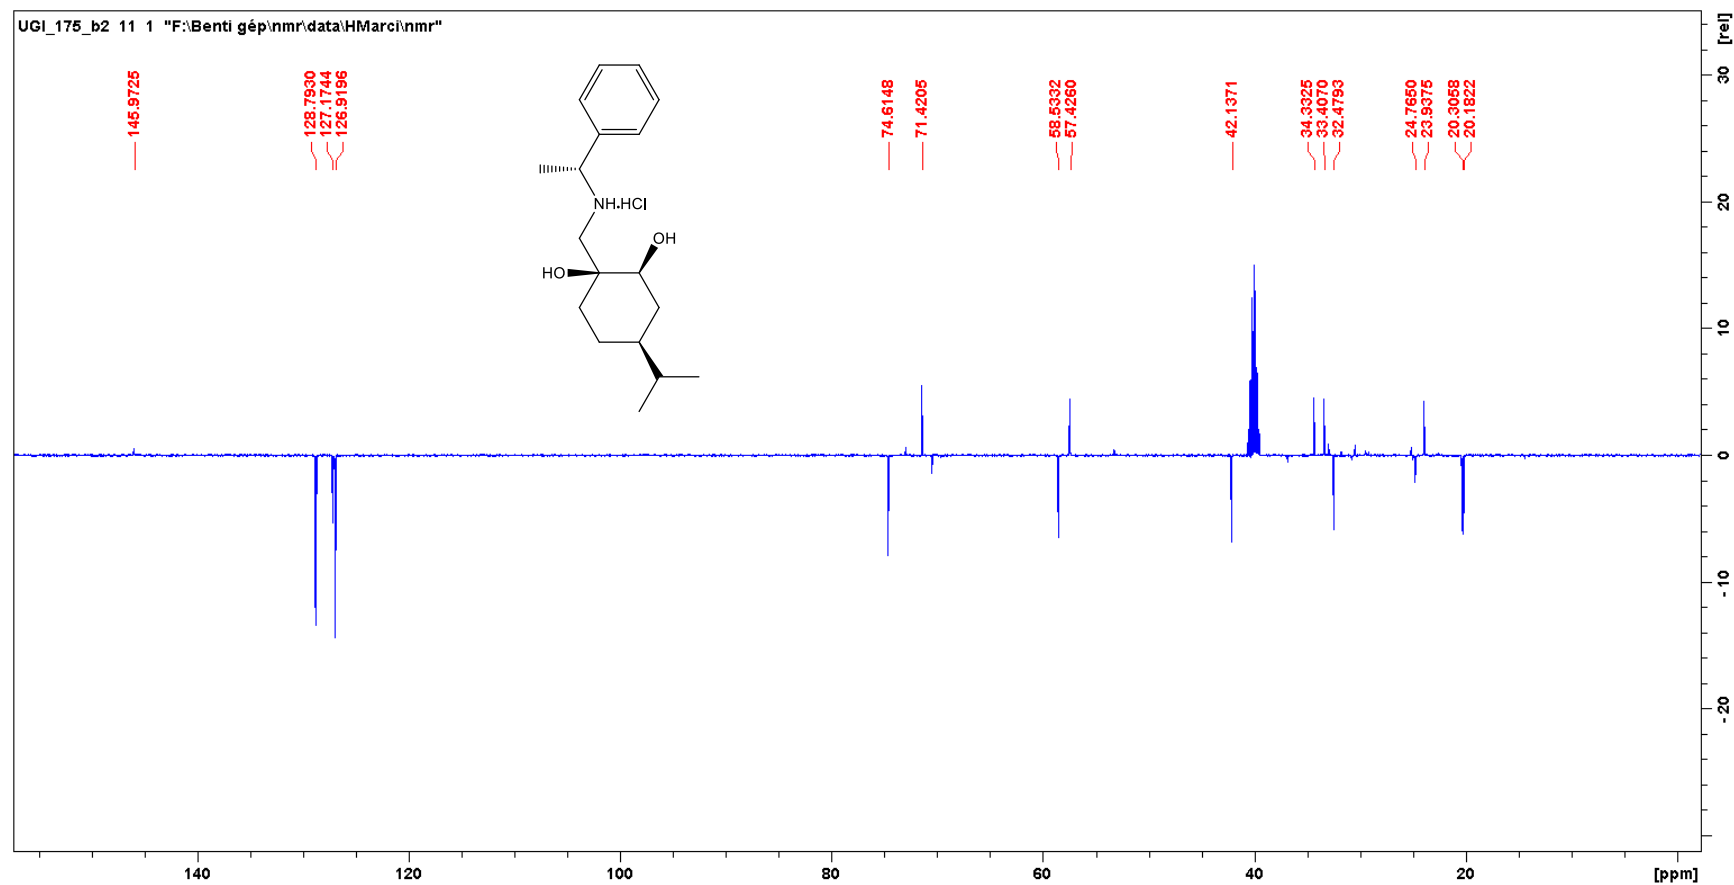

**Figure S 49:  $^1\text{H}$ -NMR of compound (1*R*,2*R*,4*S*)-1-((Benzylamino)methyl)-4-isopropylcyclohexane-1,2-diol hydrochloride **11a****

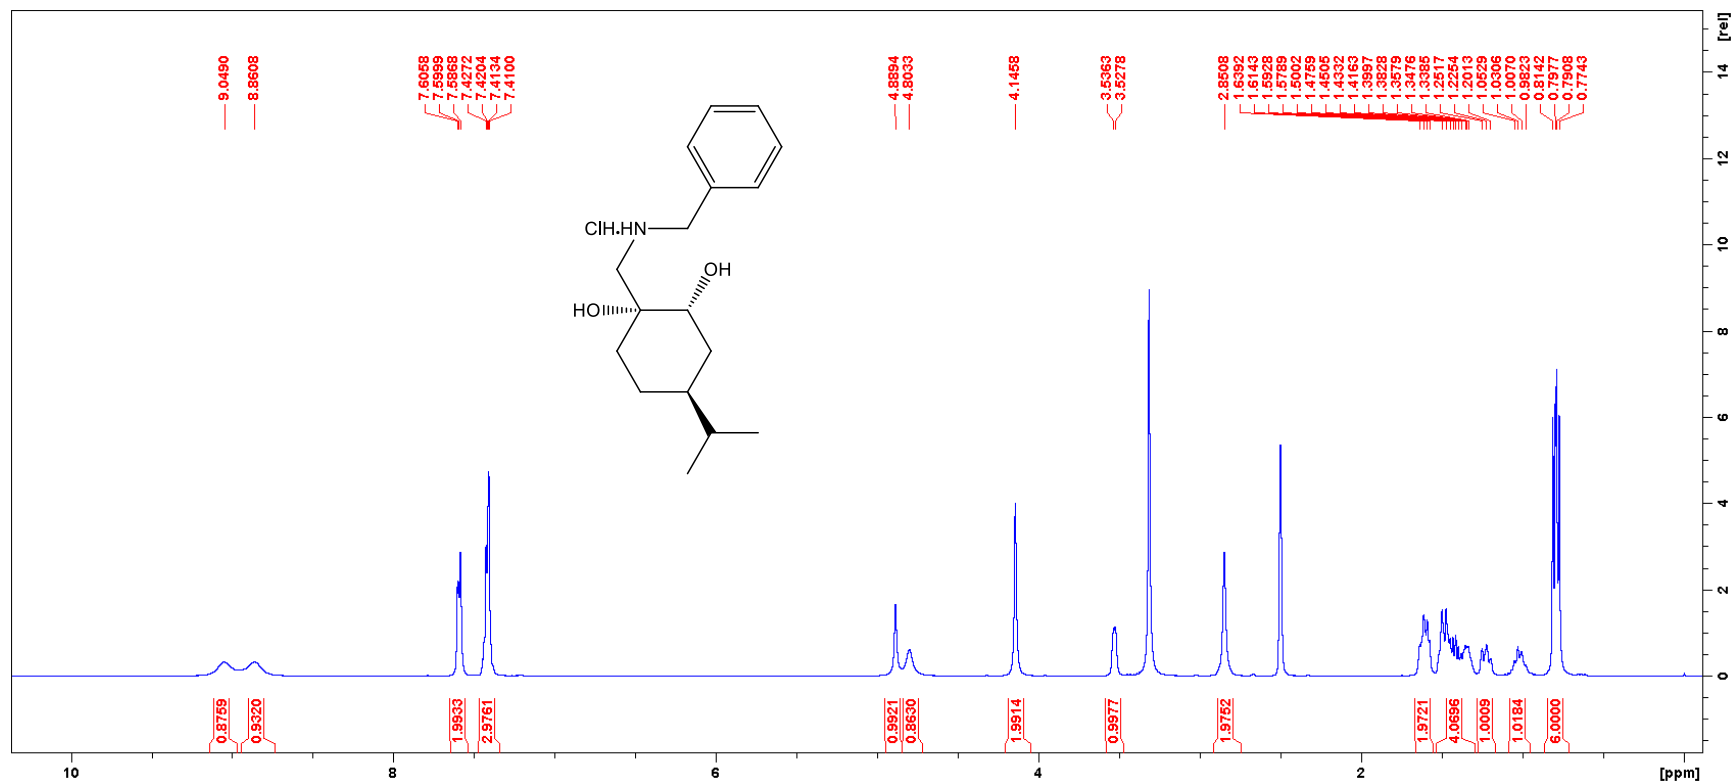

**Figure S 50:**  $^{13}\text{C}$ -NMR of compound (1*R*,2*R*,4*S*)-1-((Benzylamino)methyl)-4-isopropylcyclohexane-1,2-diol hydrochloride **11a**

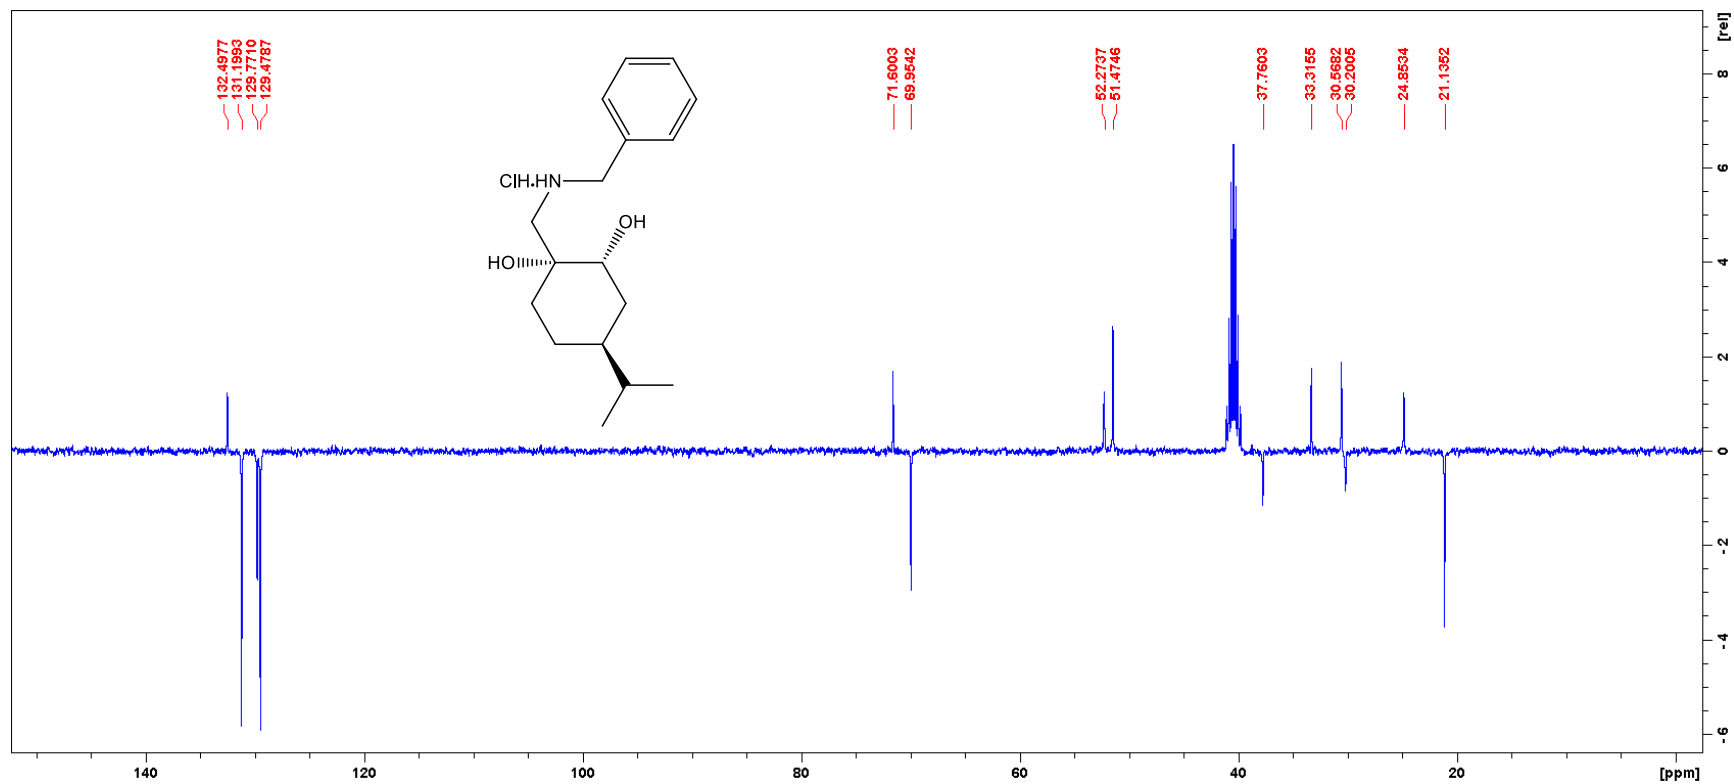

**Figure S 51: COSY NMR of compound (1*R*,2*R*,4*S*)-1-((Benzylamino)methyl)-4-isopropylcyclohexane-1,2-diol hydrochloride **11a****

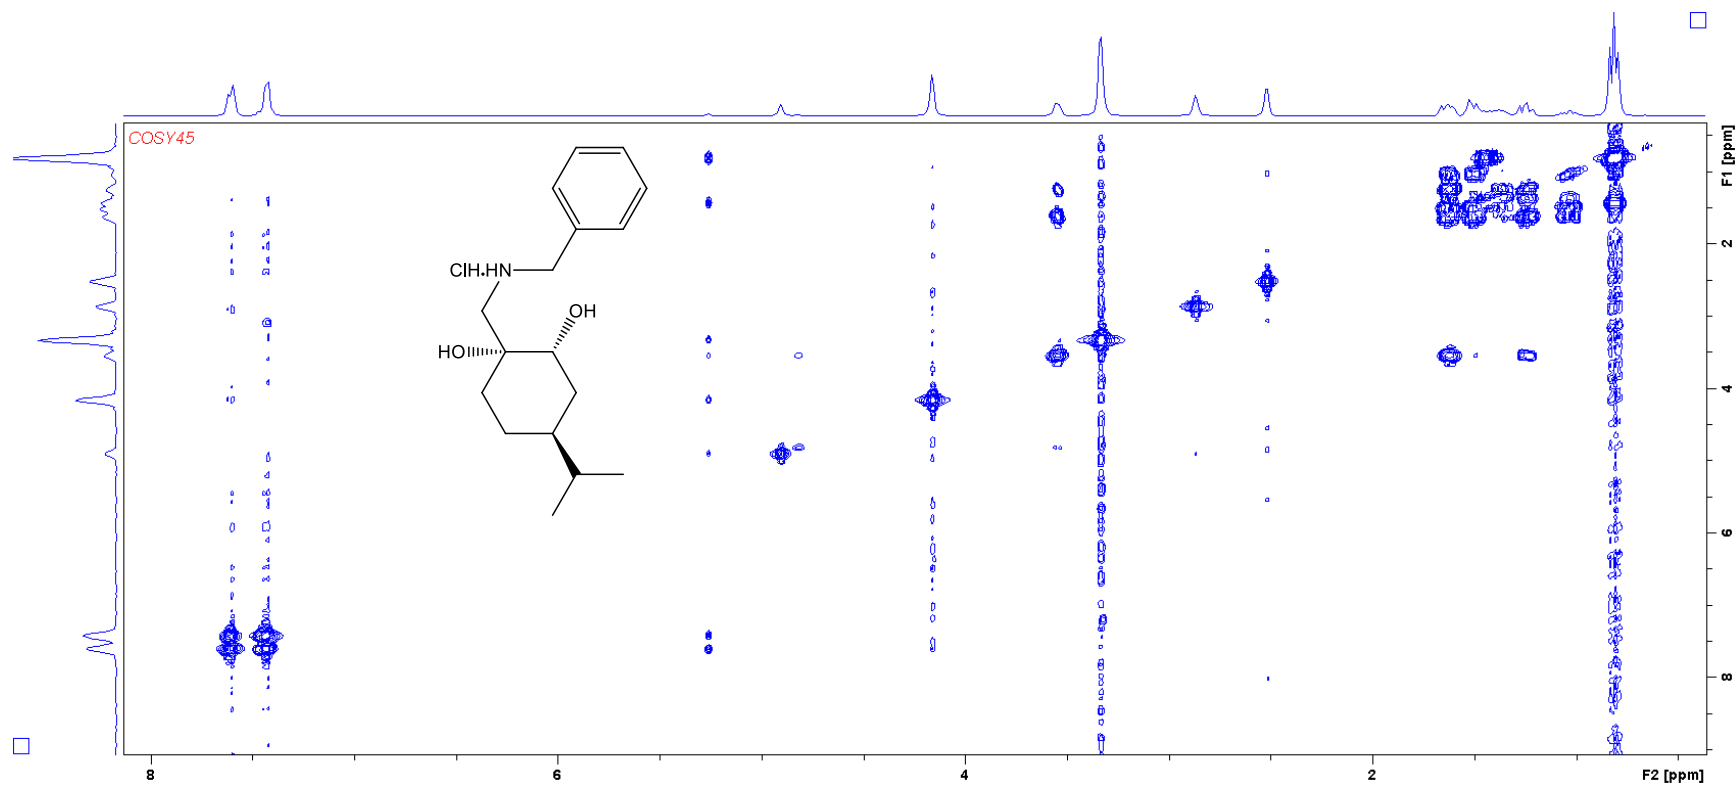



**Figure S 52: NOESY NMR of compound (1*R*,2*R*,4*S*)-1-((Benzylamino)methyl)-4-isopropylcyclohexane-1,2-diol hydrochloride **11a****

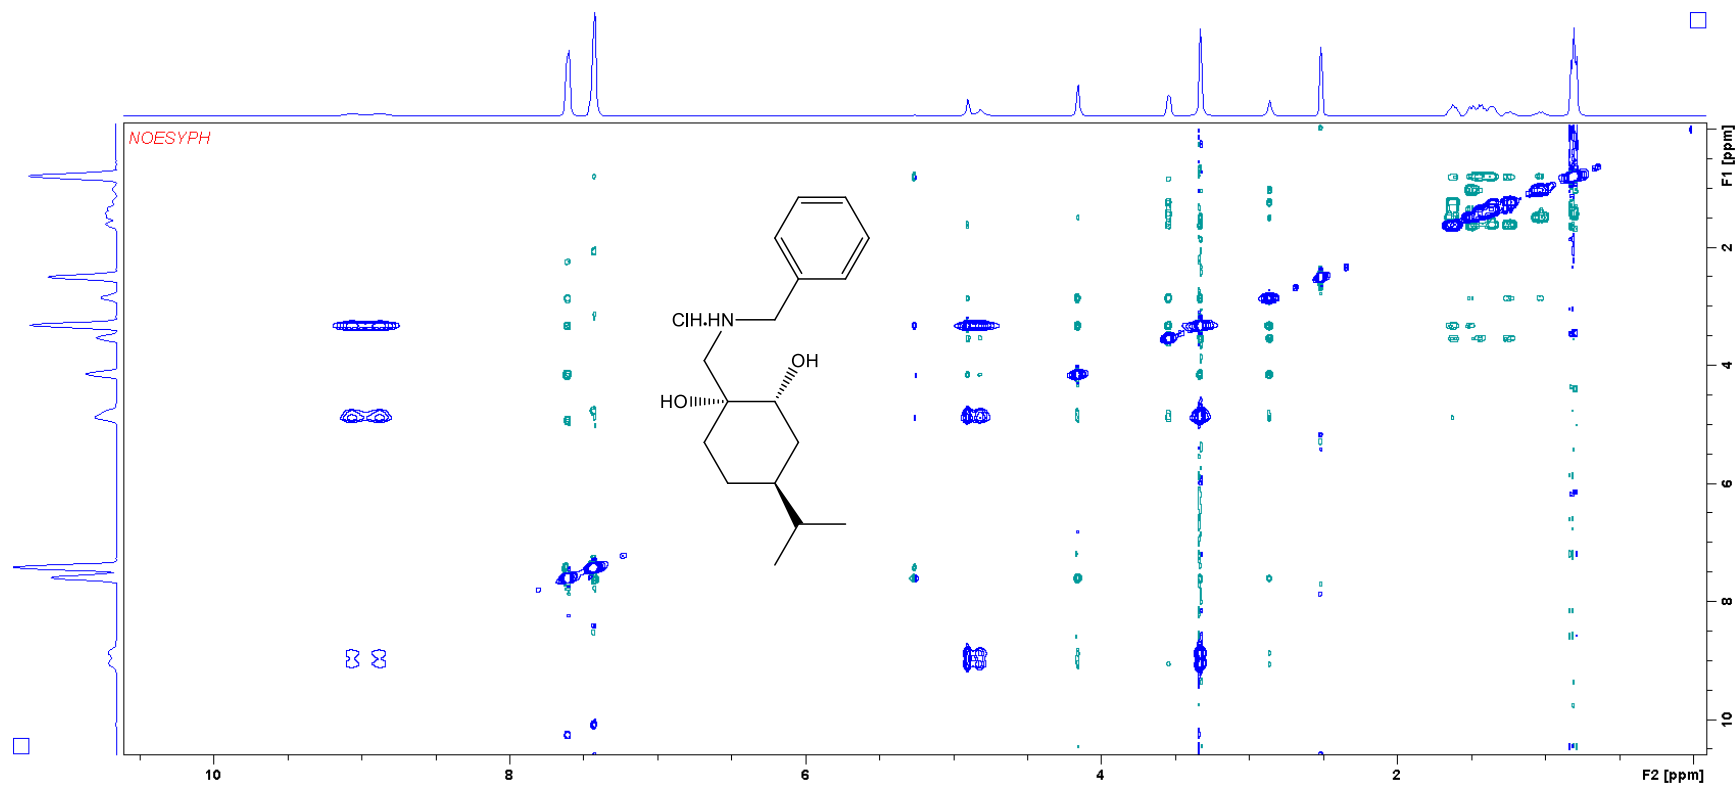

**Figure S 53: HSQC NMR of compound (1*R*,2*R*,4*S*)-1-((Benzylamino)methyl)-4-isopropylcyclohexane-1,2-diol hydrochloride **11a****

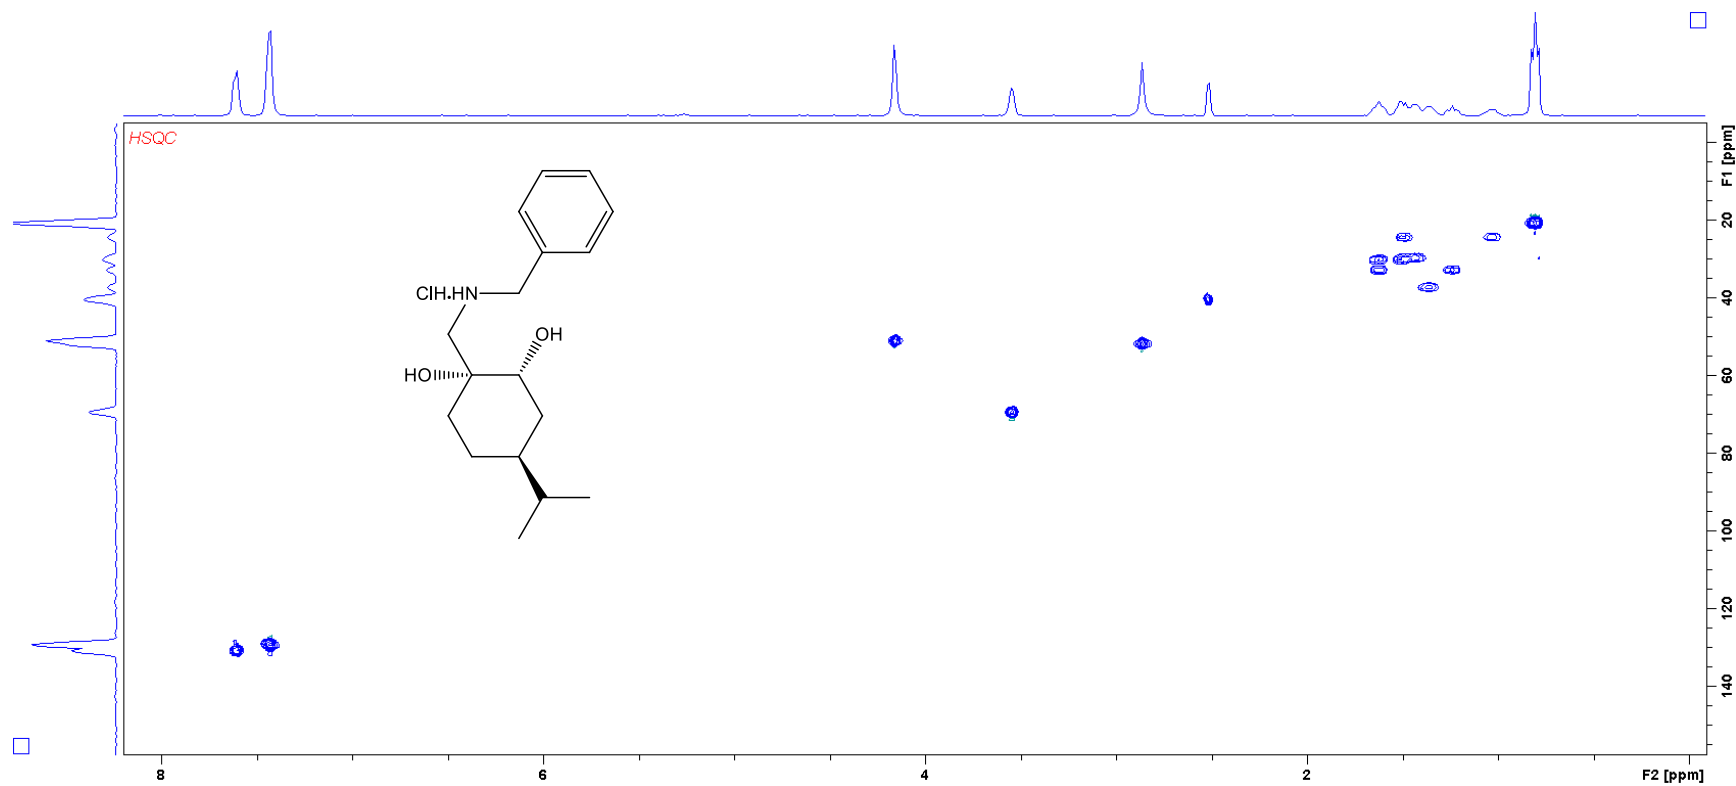

**Figure S 54: HMBC NMR of compound (1*R*,2*R*,4*S*)-1-((Benzylamino)methyl)-4-isopropylcyclohexane-1,2-diol hydrochloride **11a****

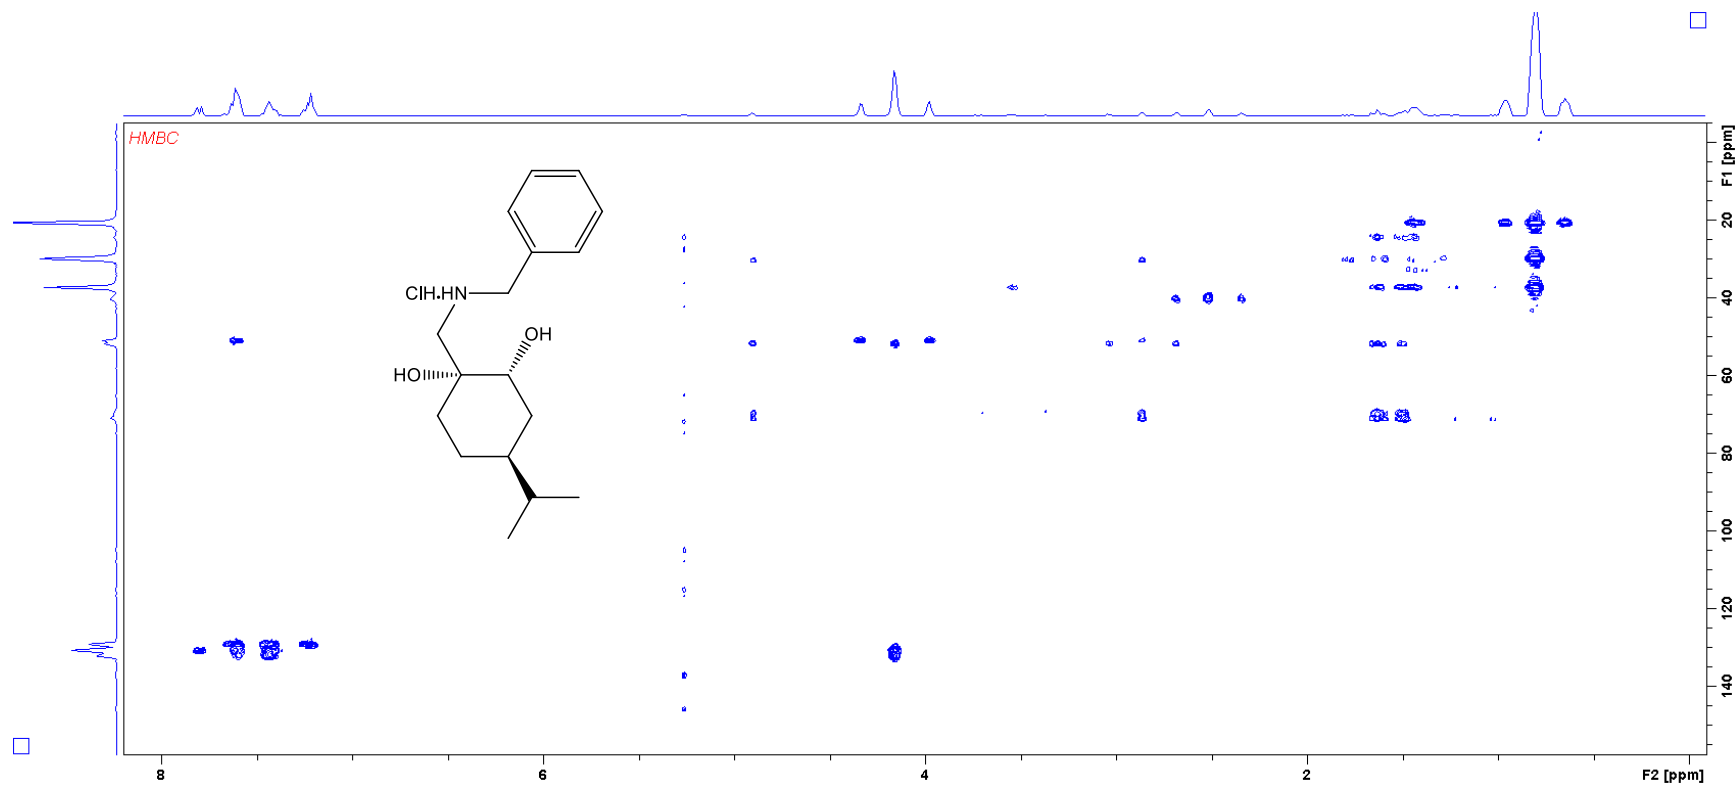

**Figure S 55:  $^1\text{H}$ -NMR of compound (1*R*,2*R*,4*S*)-4-Isopropyl-1-(((*S*)-1-phenylethyl)amino)methyl)cyclohexane-1,2-diol hydrochloride **11b****

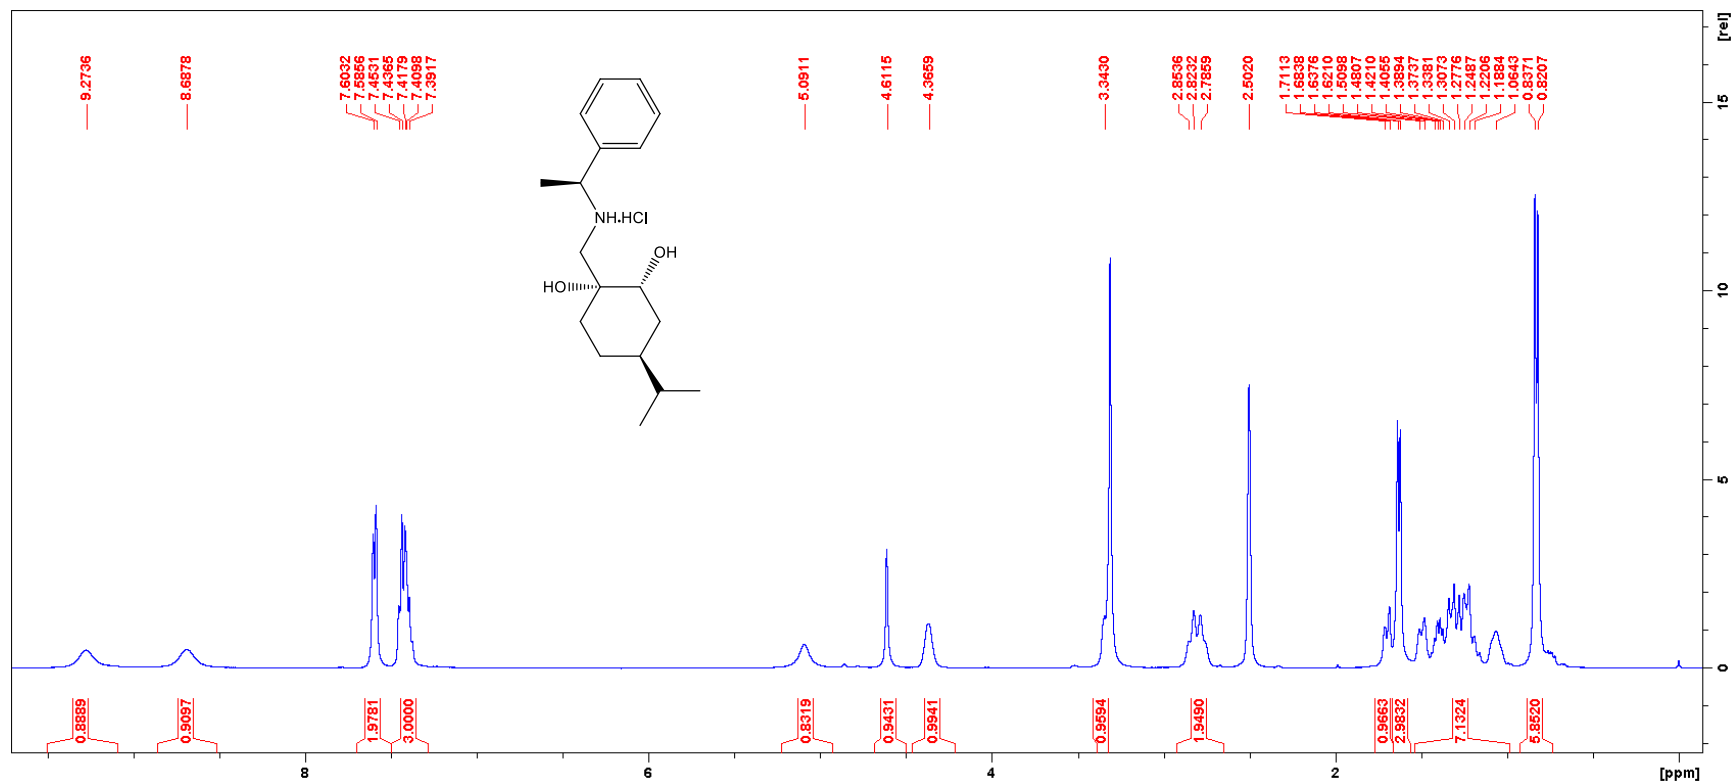

**Figure S 56:**  $^{13}\text{C}$ -NMR of compound (1*R*,2*R*,4*S*)-4-Isopropyl-1-((((*S*)-1-phenylethyl)amino)methyl)cyclohexane-1,2-diol hydrochloride **11b**

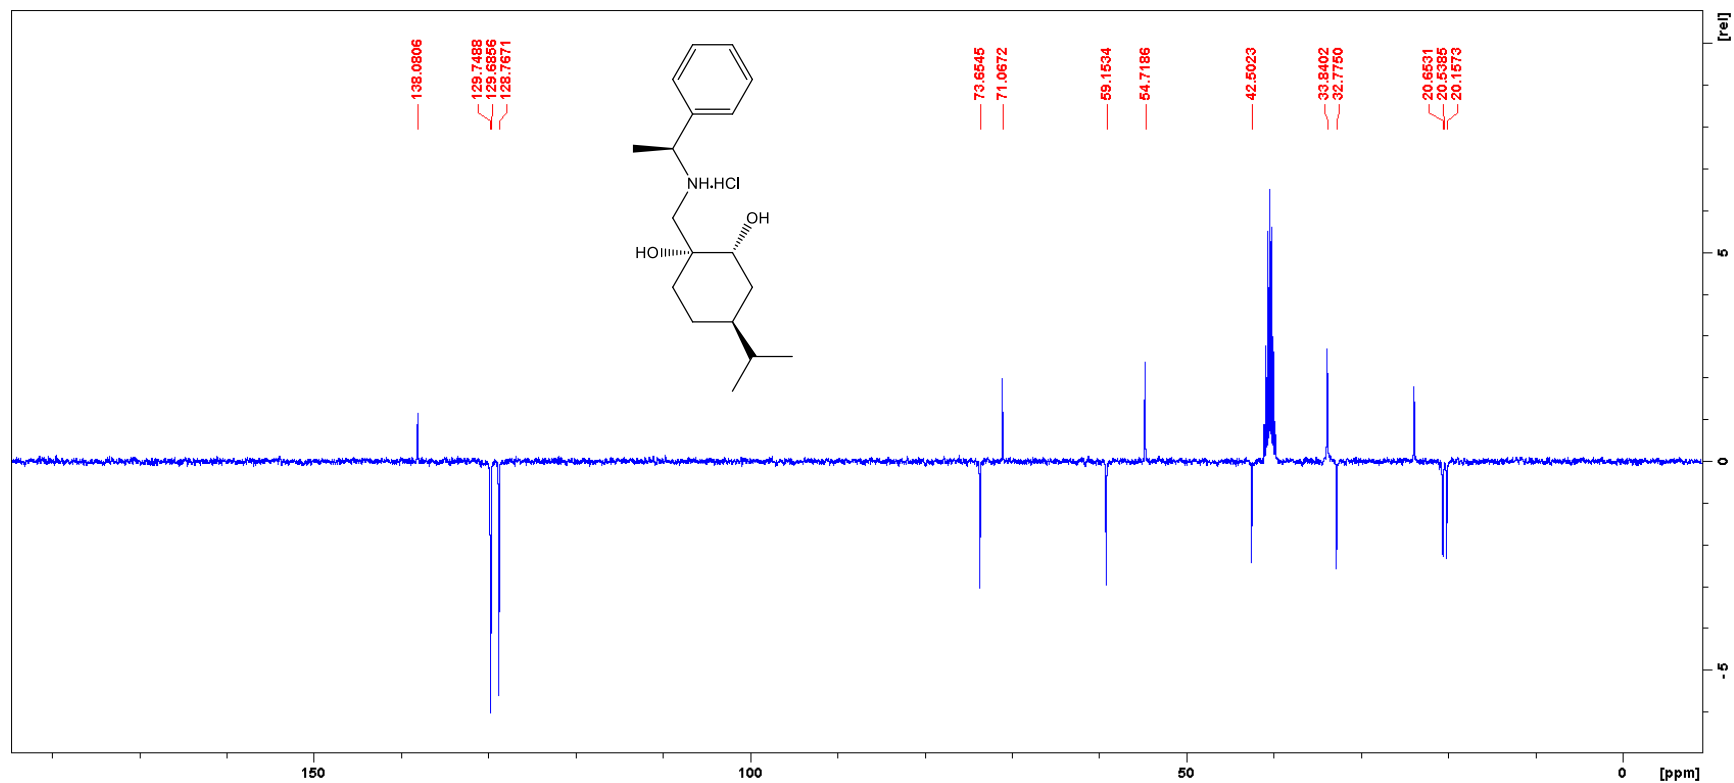

**Figure S 57: COSY NMR of compound (1*R*,2*R*,4*S*)-4-Isopropyl-1-(((*S*)-1-phenylethyl)amino)methyl)cyclohexane-1,2-diol hydrochloride **11b****

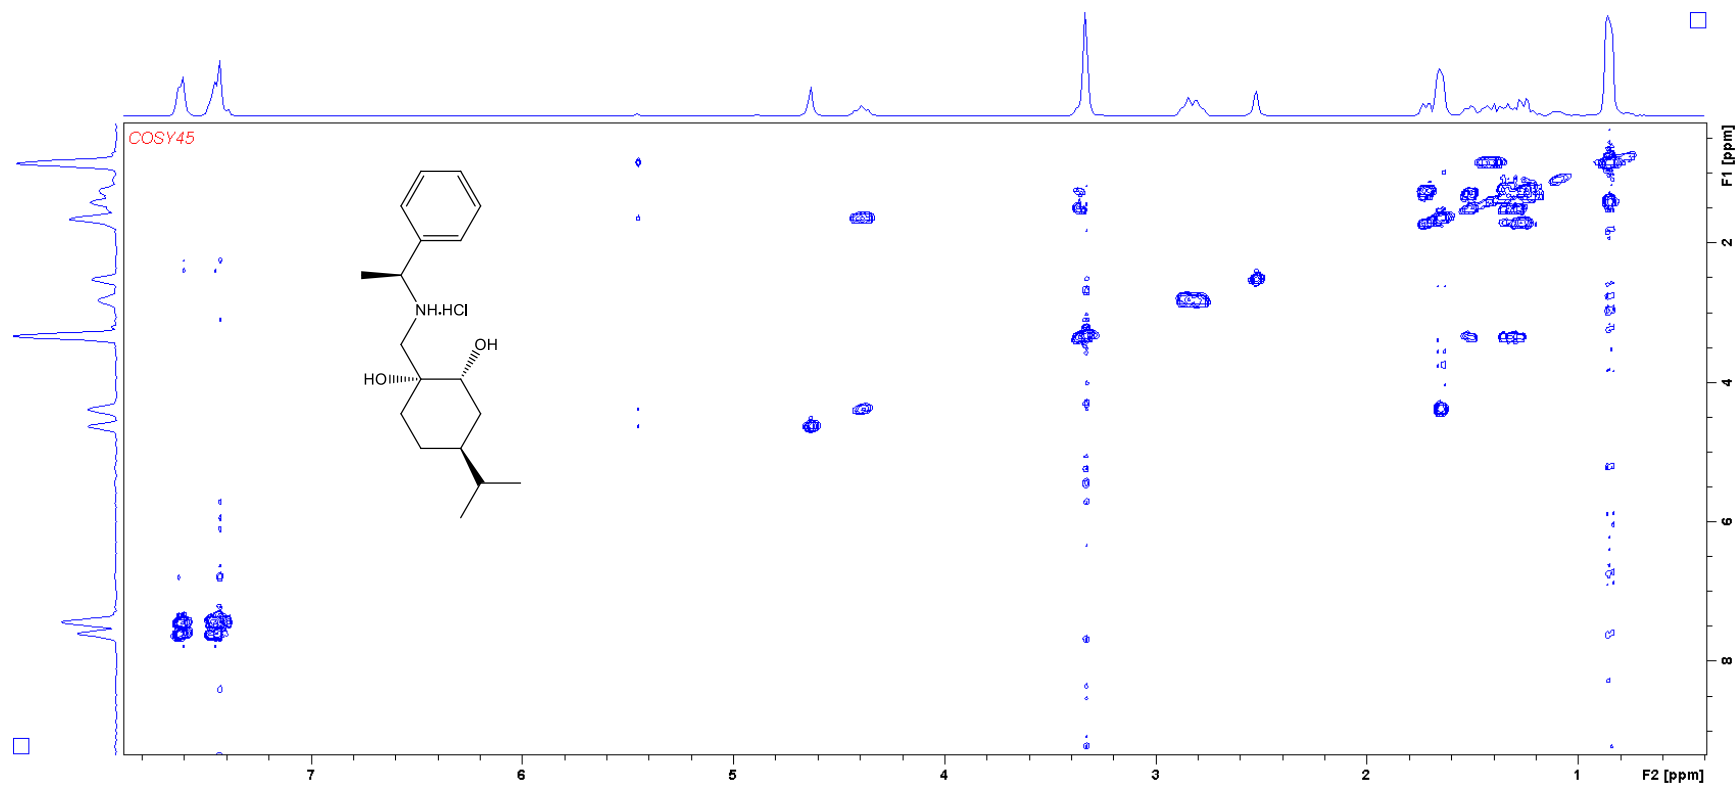

**Figure S 58: NOESY NMR of compound (1*R*,2*R*,4*S*)-4-Isopropyl-1-(((*S*)-1-phenylethyl)amino)methyl)cyclohexane-1,2-diol hydrochloride **11b****

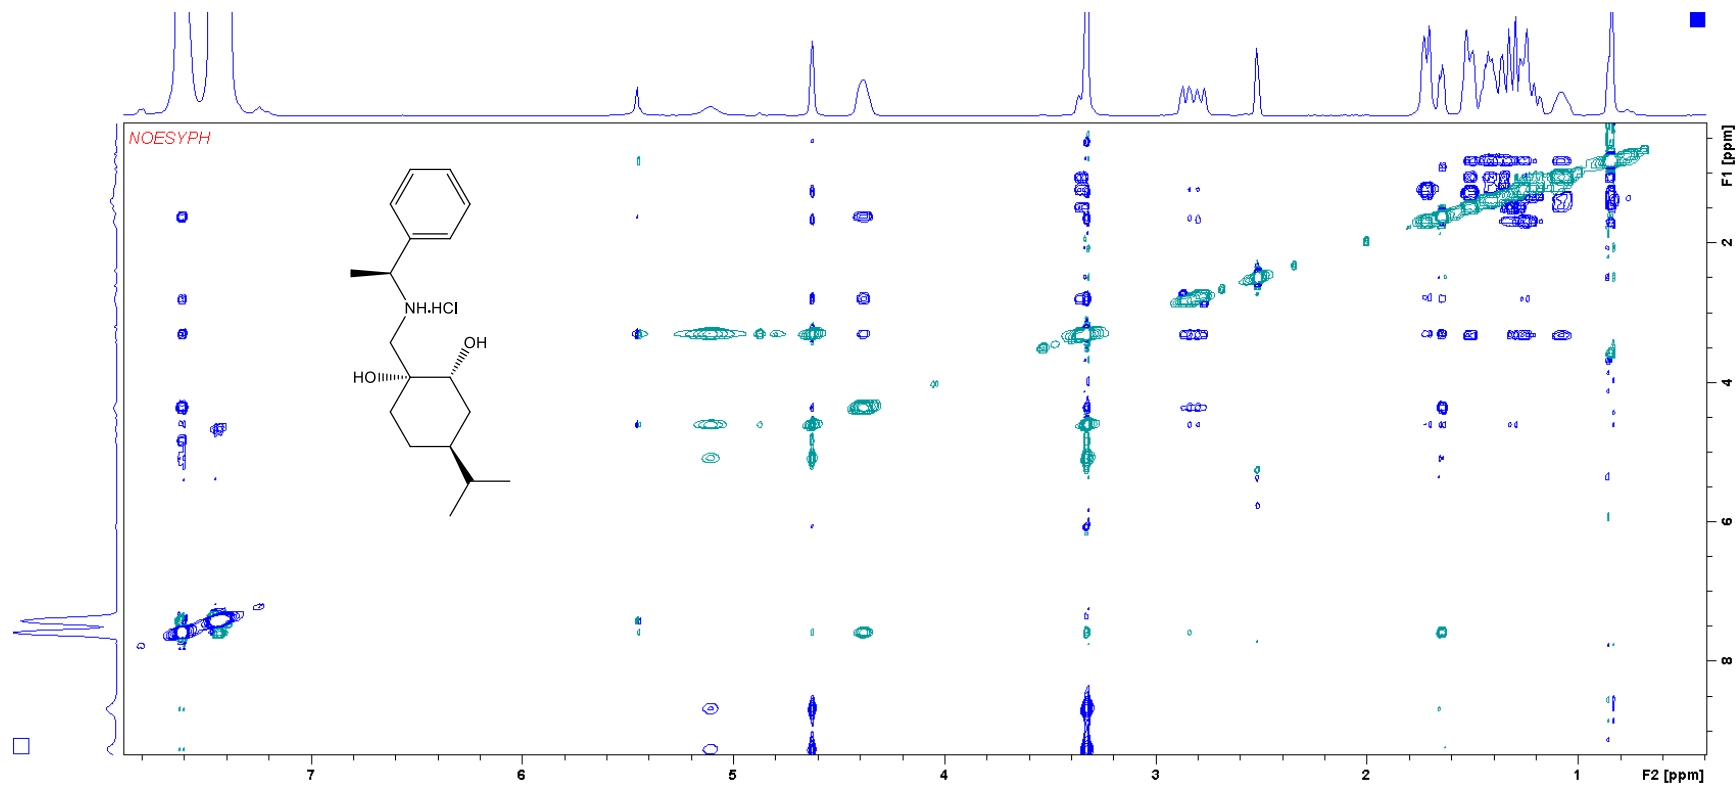

**Figure S 59: HSQC NMR of compound (1*R*,2*R*,4*S*)-4-Isopropyl-1-(((*S*)-1-phenylethyl)amino)methyl)cyclohexane-1,2-diol hydrochloride **11b****

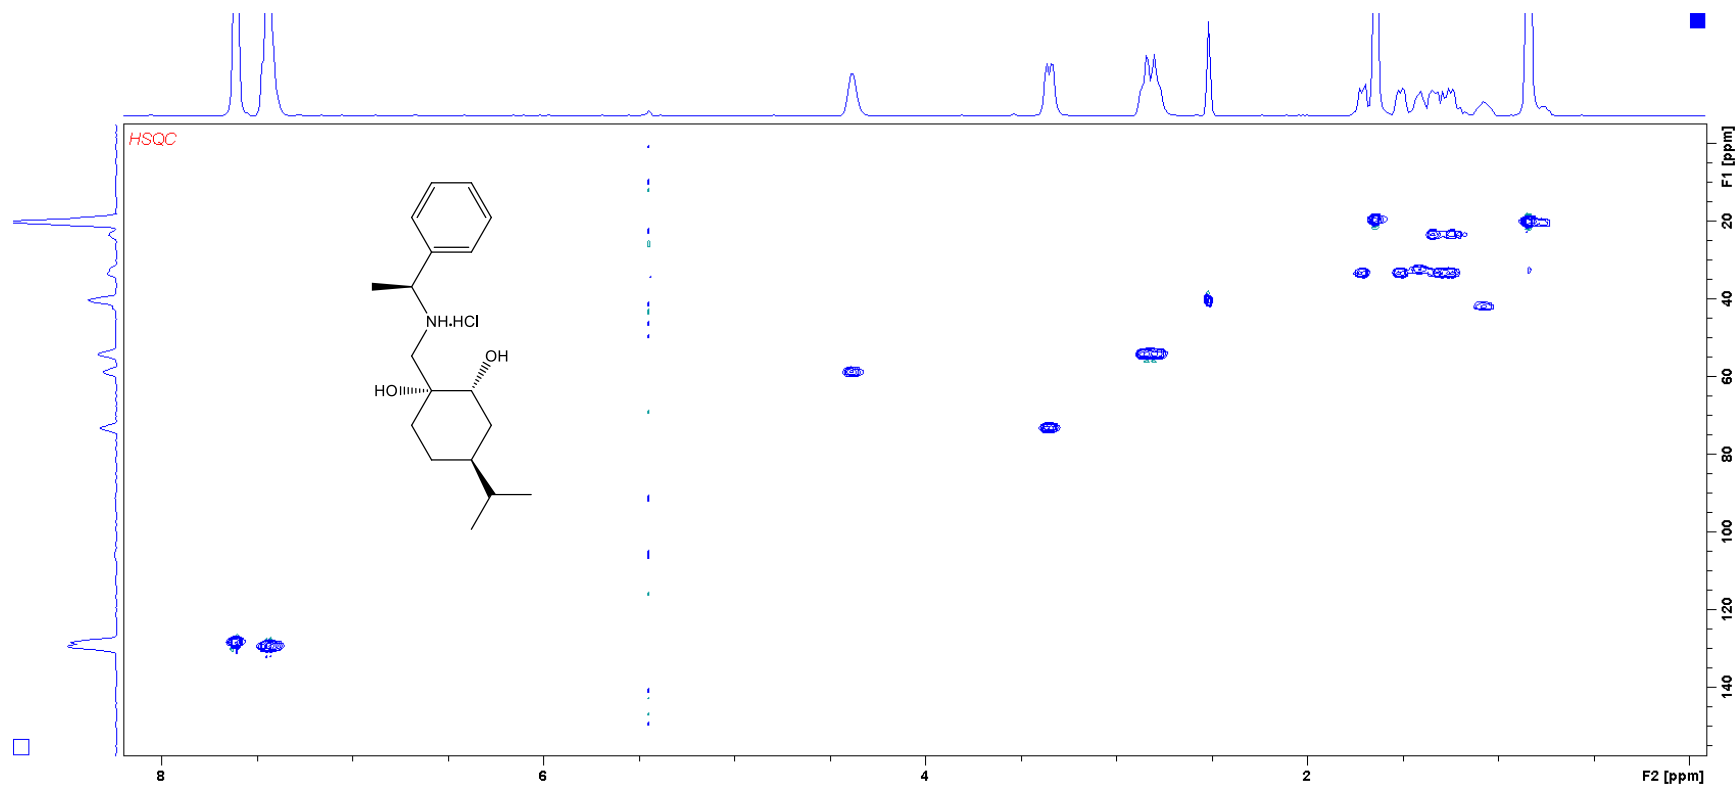



**Figure S 60:  $^1\text{H}$ -NMR of compound (1*R*,2*R*,4*S*)-4-Isopropyl-1-((((*R*)-1-phenylethyl)amino)methyl)cyclohexane-1,2-diol hydrochloride **11c****

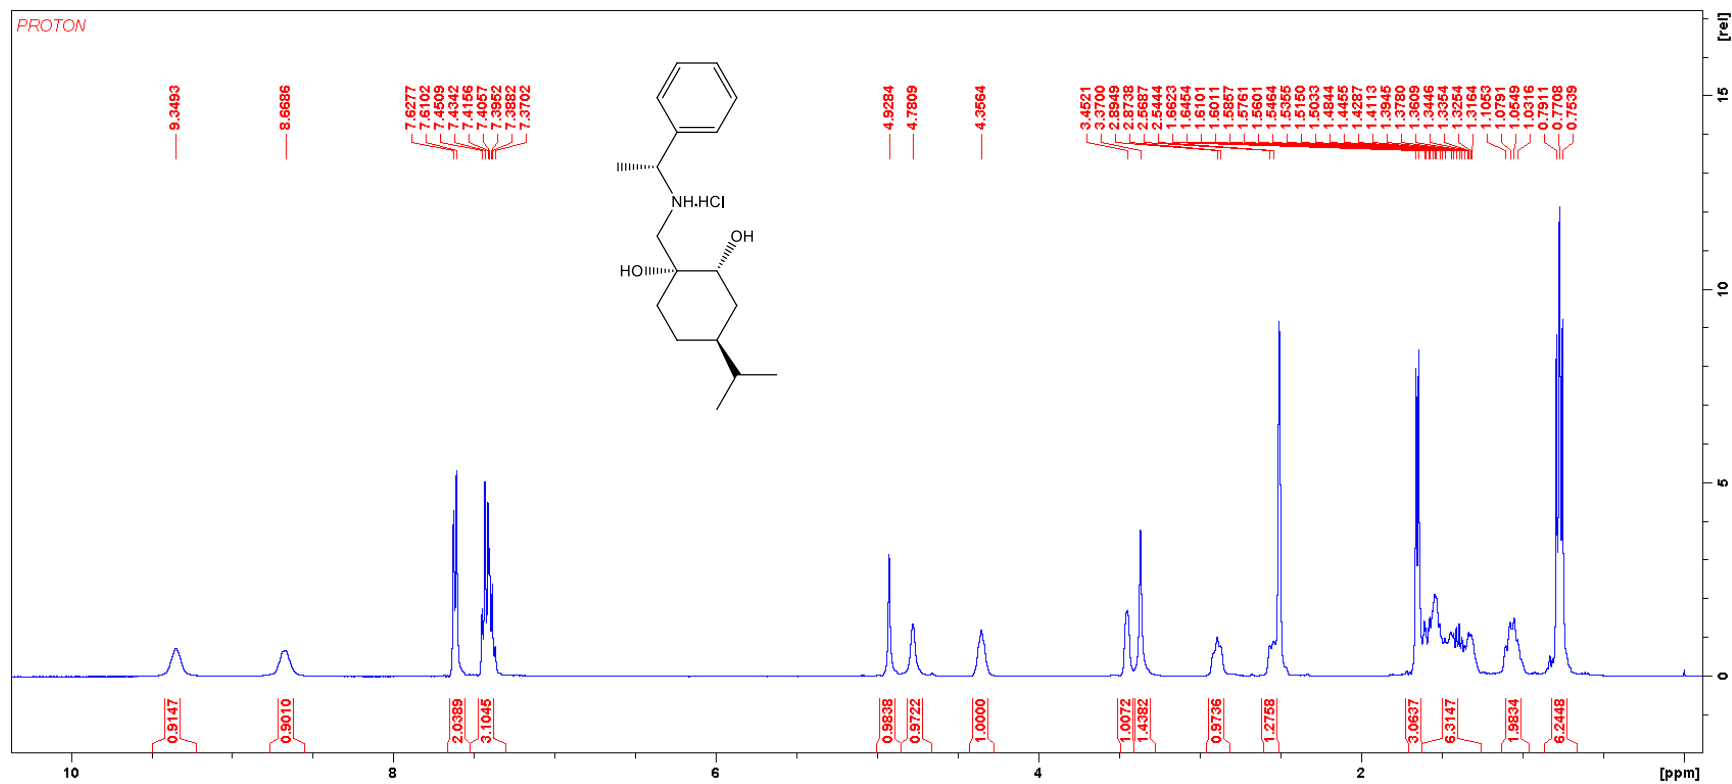

**Figure S 61:**  $^{13}\text{C}$ -NMR of compound (1*R*,2*R*,4*S*)-4-Isopropyl-1-(((*R*)-1-phenylethyl)amino)methyl)cyclohexane-1,2-diol hydrochloride **11c**

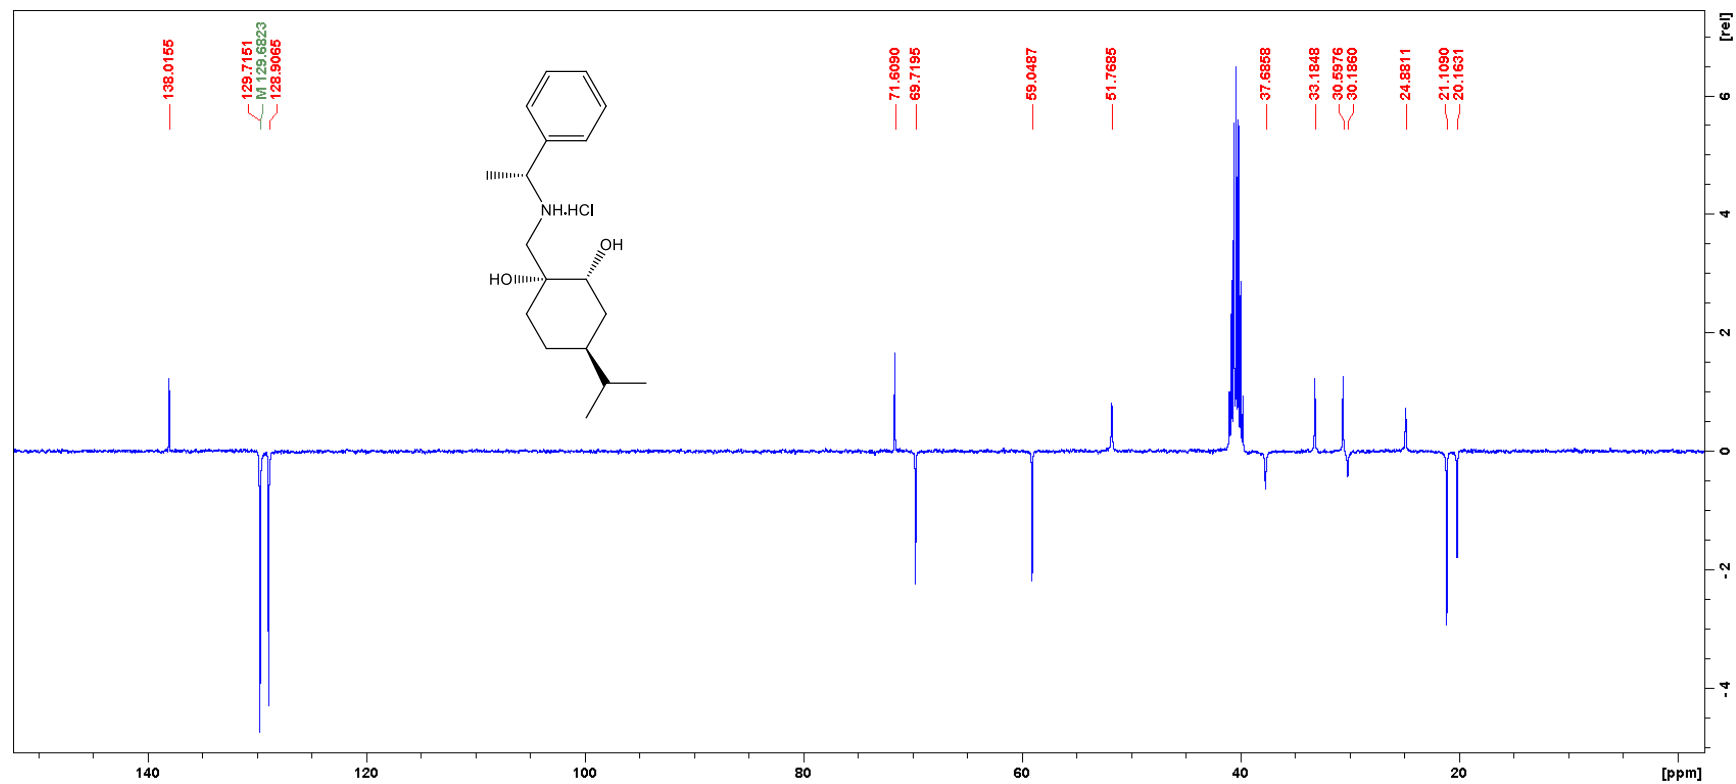

**Figure S 62:  $^1\text{H}$ -NMR of compound (1*S*,2*S*,4*S*)-1-(Aminomethyl)-4-isopropylcyclohexane-1,2-diol hydrochloride **8****

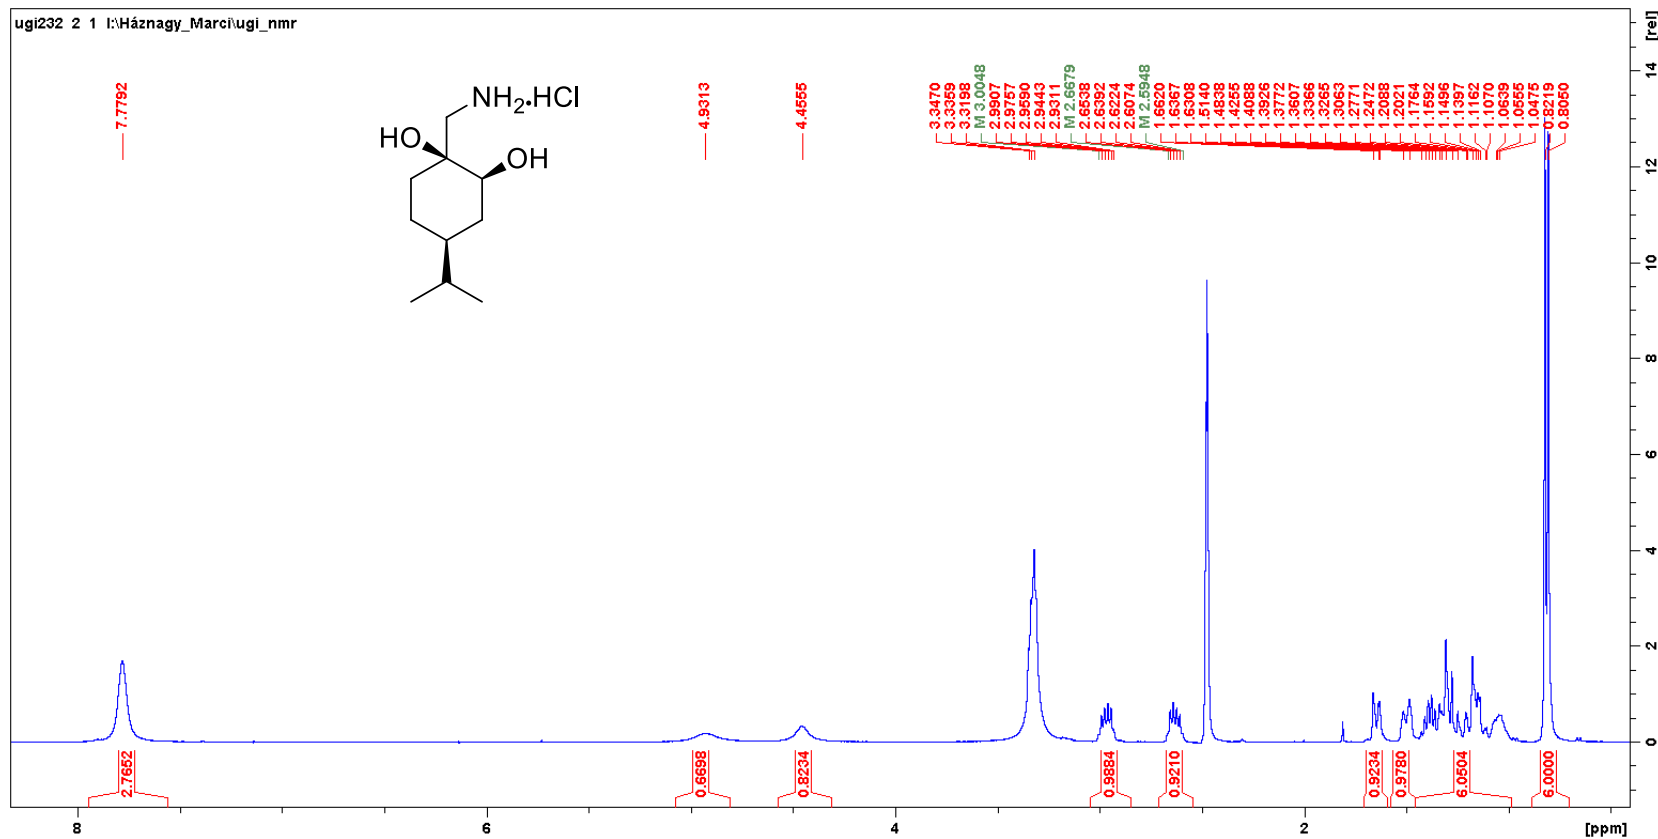

**Figure S 63:**  $^{13}\text{C}$ -NMR of compound (1*S*,2*S*,4*S*)-1-(Aminomethyl)-4-isopropylcyclohexane-1,2-diol hydrochloride **8**

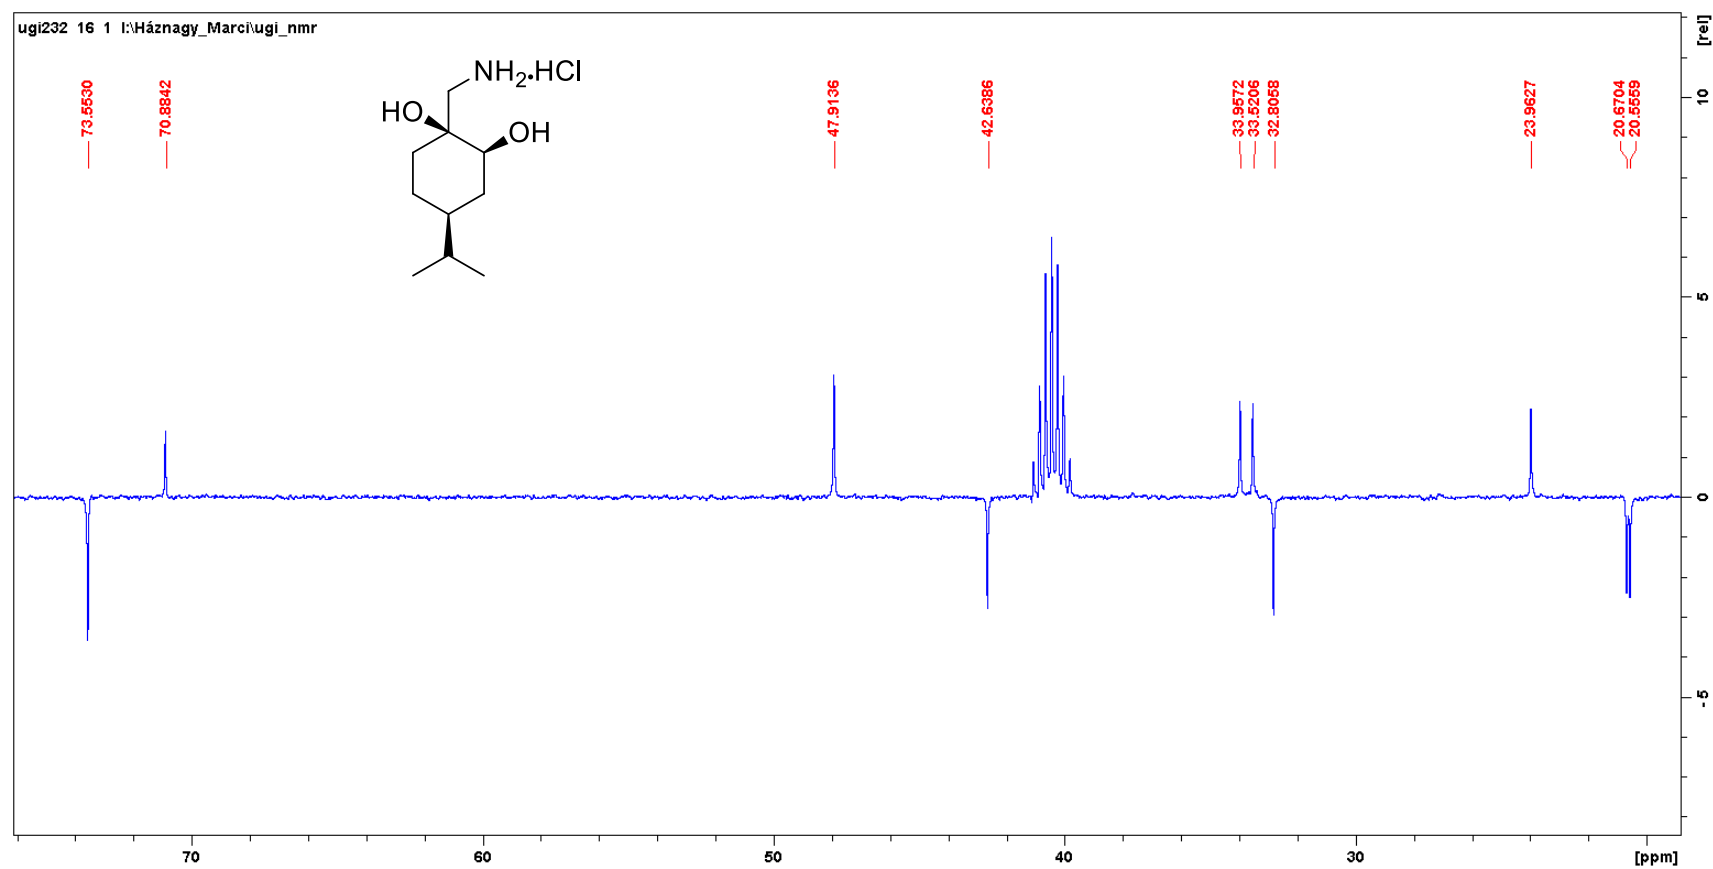

**Figure S 64: COSY NMR of compound (1S,2S,4S)-1-(Aminomethyl)-4-isopropylcyclohexane-1,2-diol hydrochloride 8**

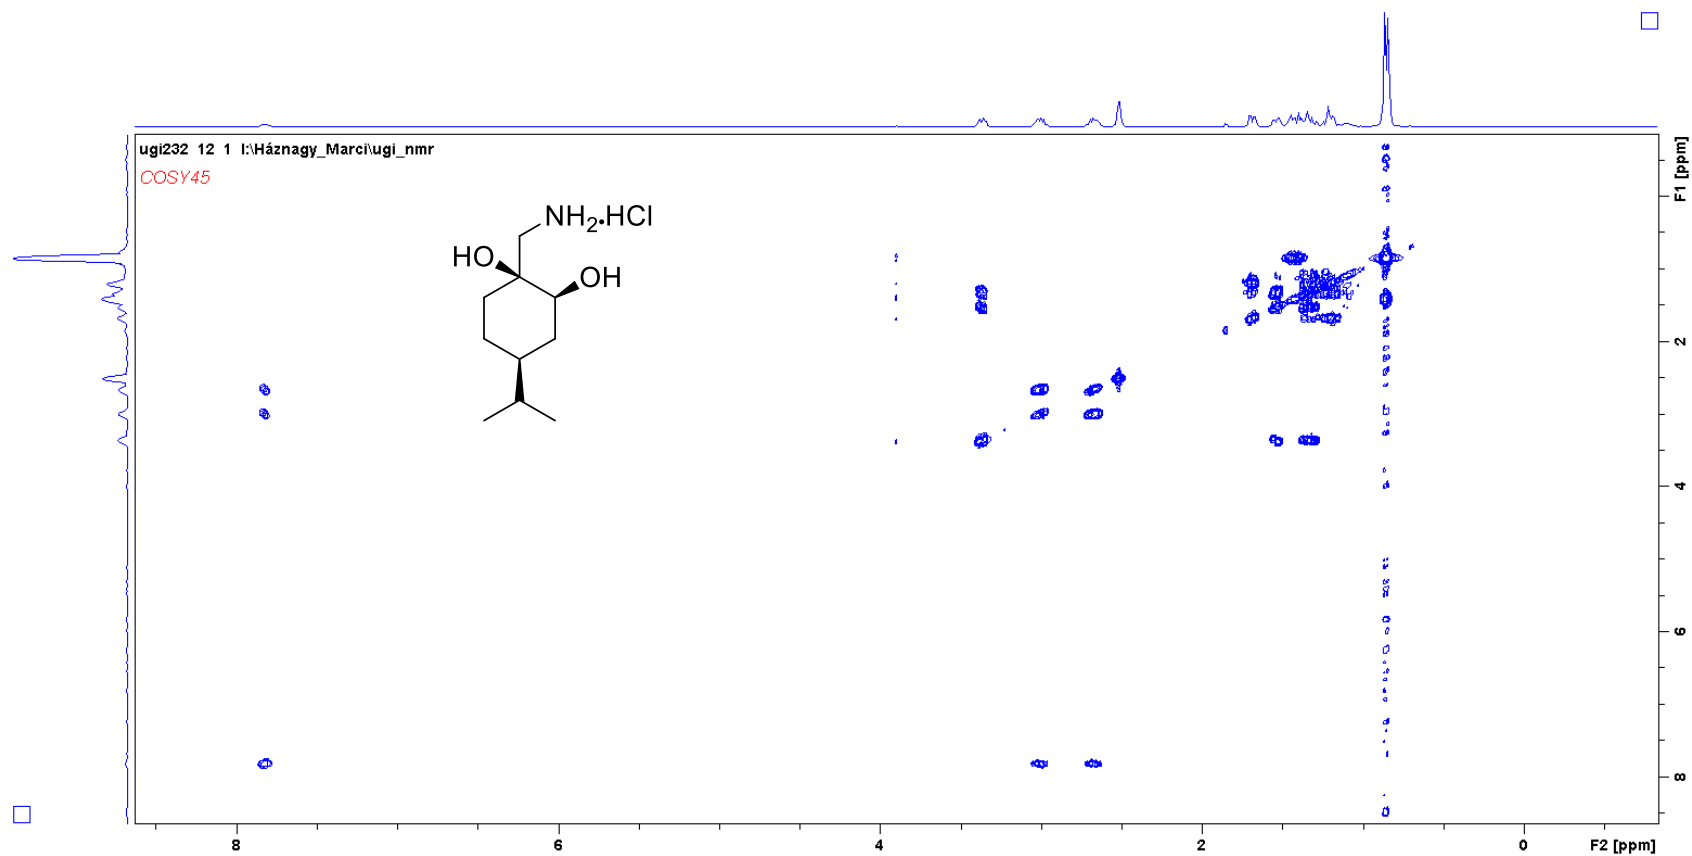

**Figure S 65: HSQC NMR of compound (1S,2S,4S)-1-(Aminomethyl)-4-isopropylcyclohexane-1,2-diol hydrochloride 8**

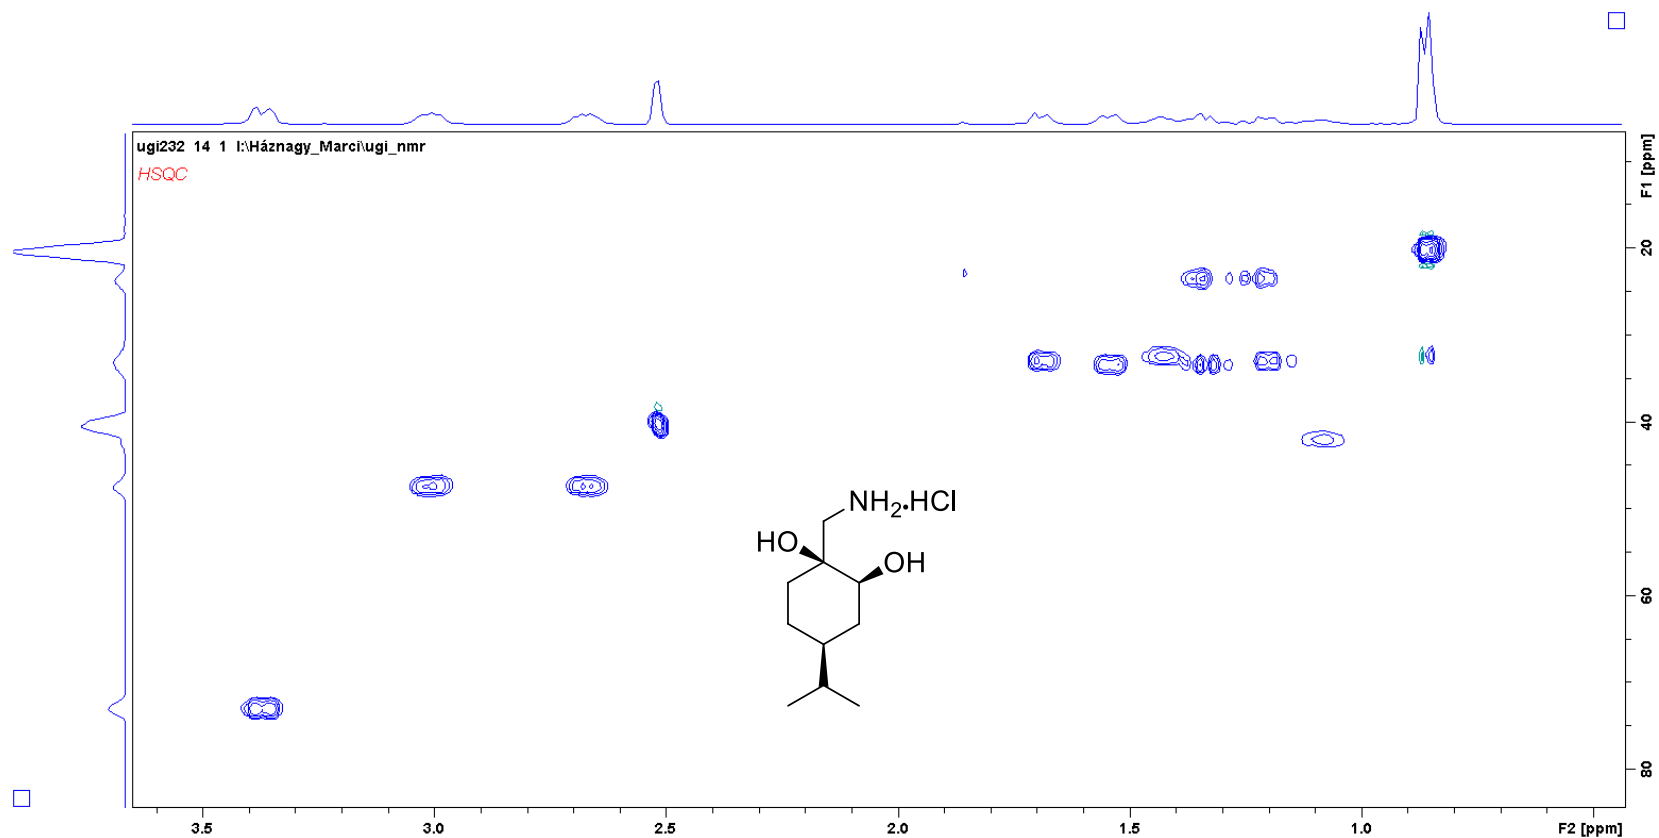

**Figure S 66: HMBC NMR of compound (1S,2S,4S)-1-(Aminomethyl)-4-isopropylcyclohexane-1,2-diol hydrochloride 8**

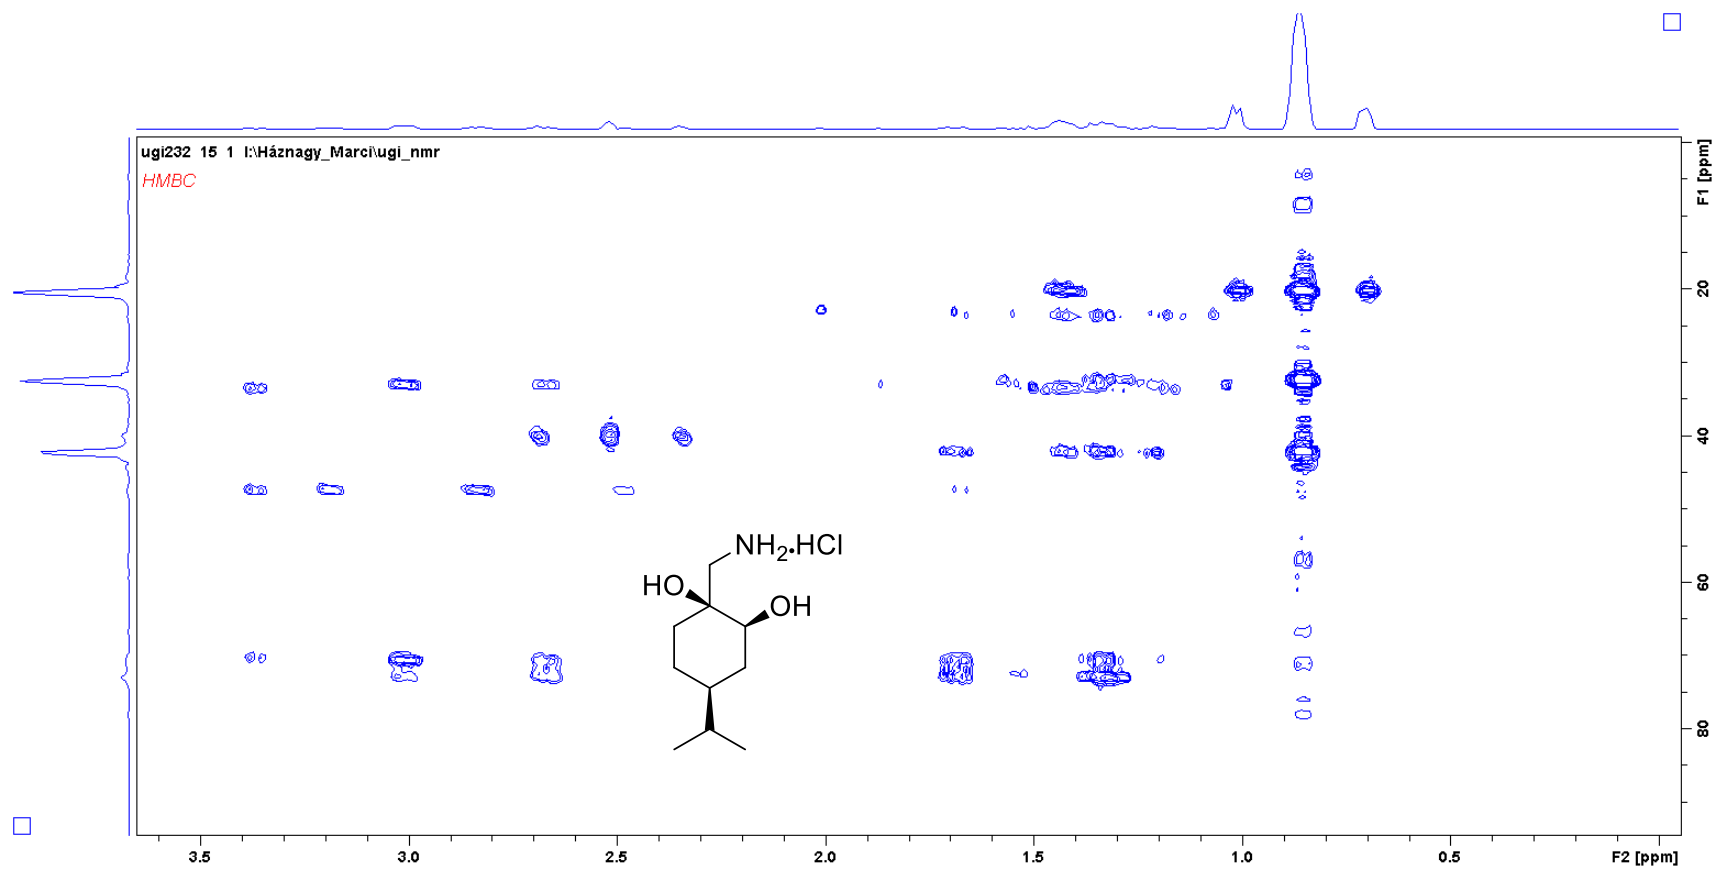

**Figure S 67:  $^1\text{H}$ -NMR of compound (1*R*,2*R*,4*S*)-1-(Aminomethyl)-4-isopropylcyclohexane-1,2-diol hydrochloride **12****

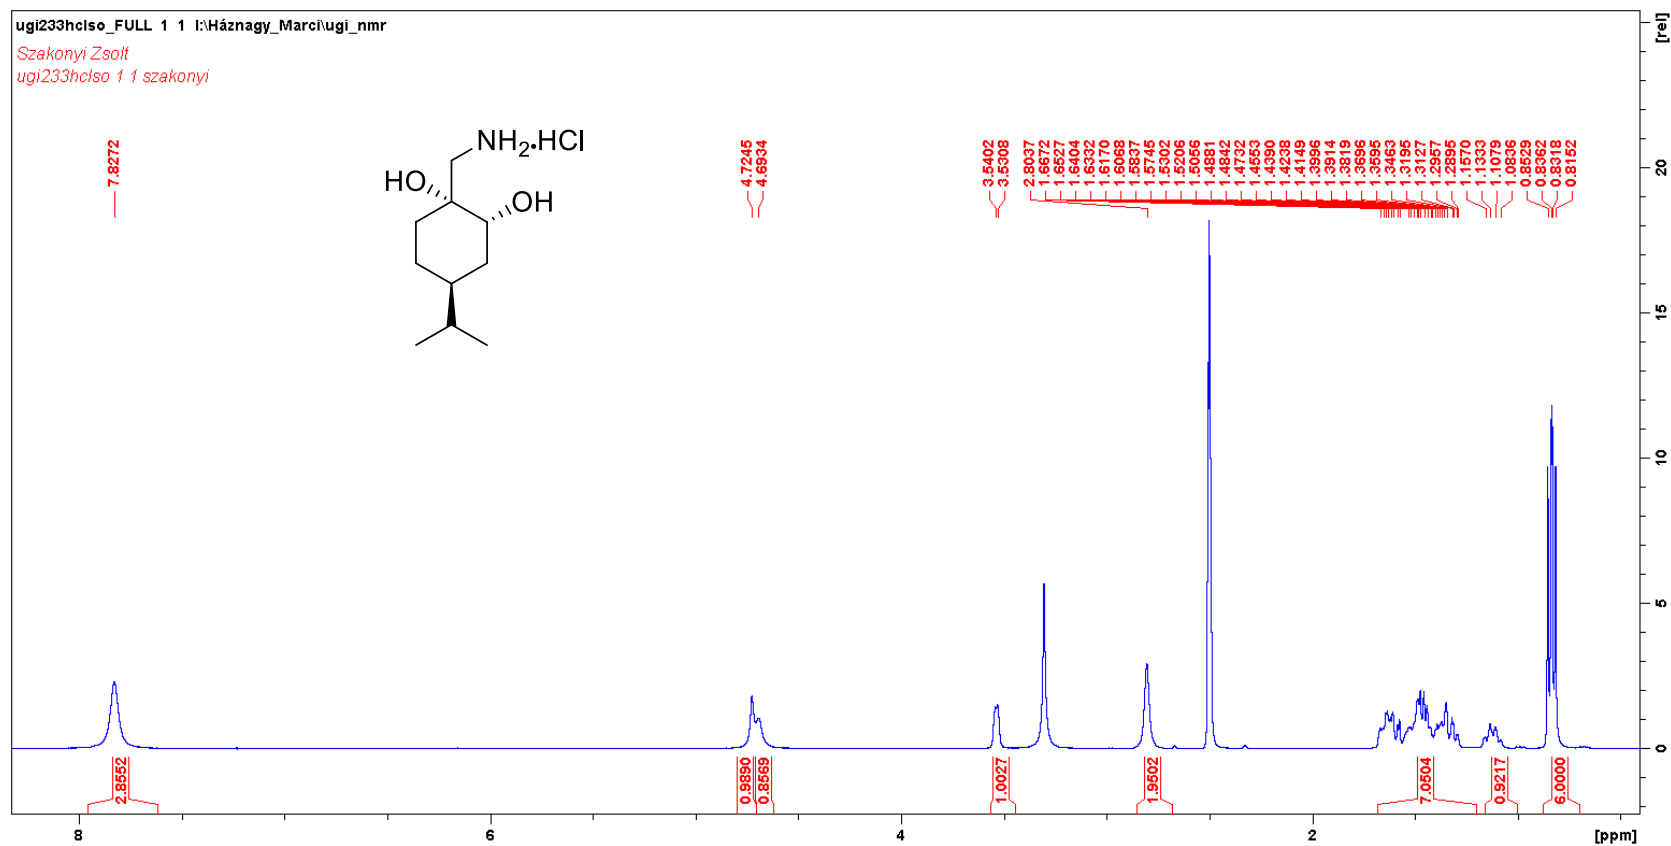



**Figure S 68:**  $^{13}\text{C}$ -NMR of compound (1*R*,2*R*,4*S*)-1-(Aminomethyl)-4-isopropylcyclohexane-1,2-diol hydrochloride **12**

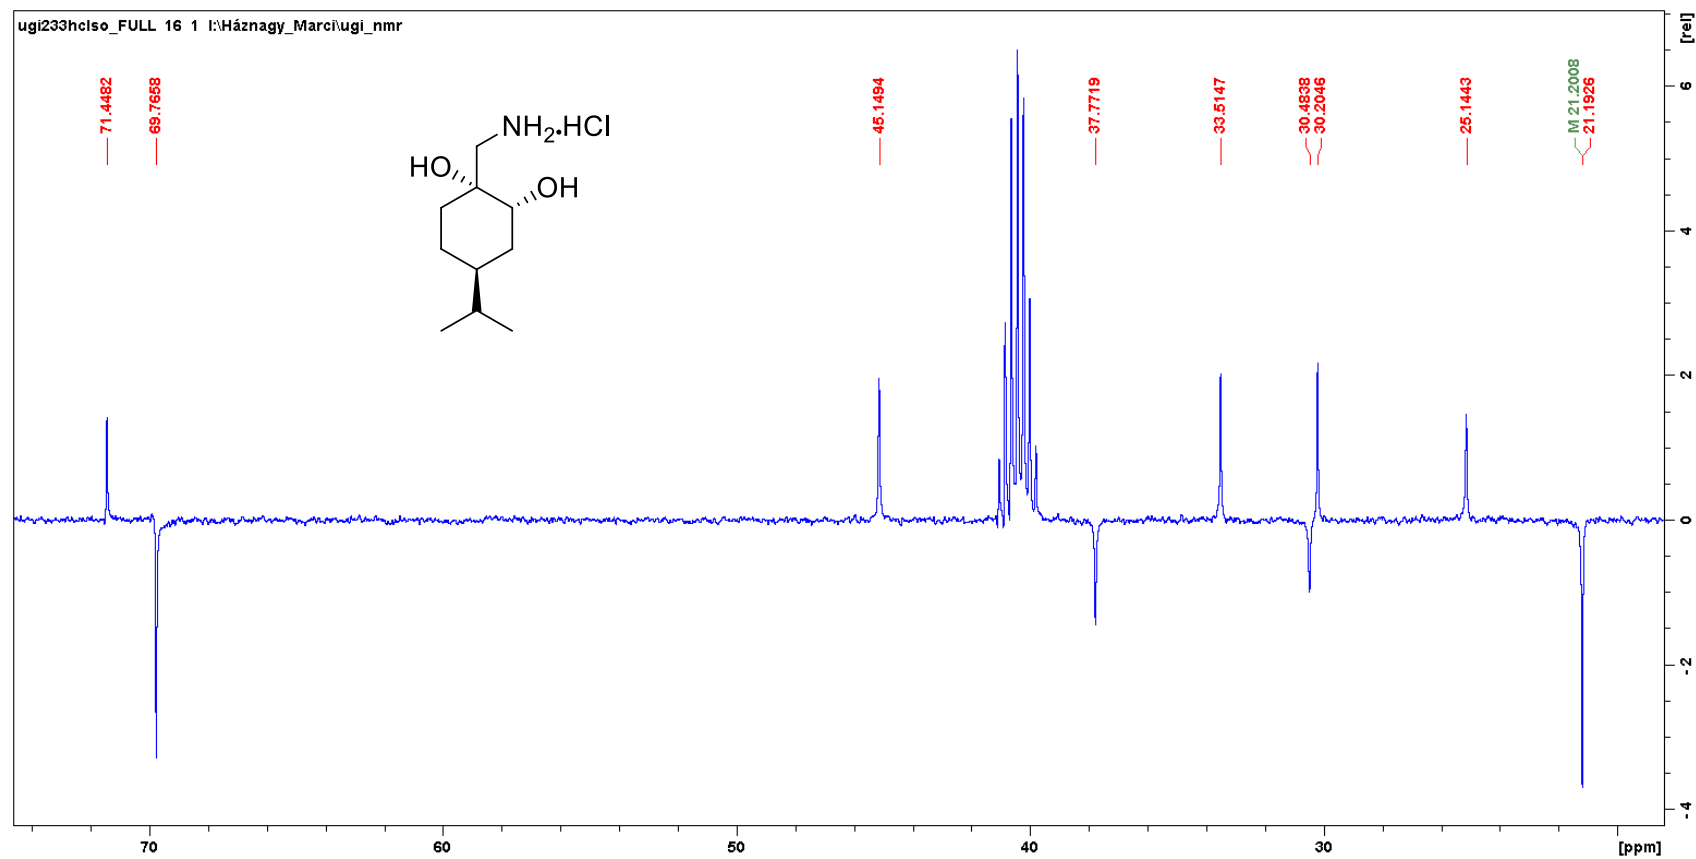

**Figure S 69: COSY NMR of compound (1*R*,2*R*,4*S*)-1-(Aminomethyl)-4-isopropylcyclohexane-1,2-diol hydrochloride **12****

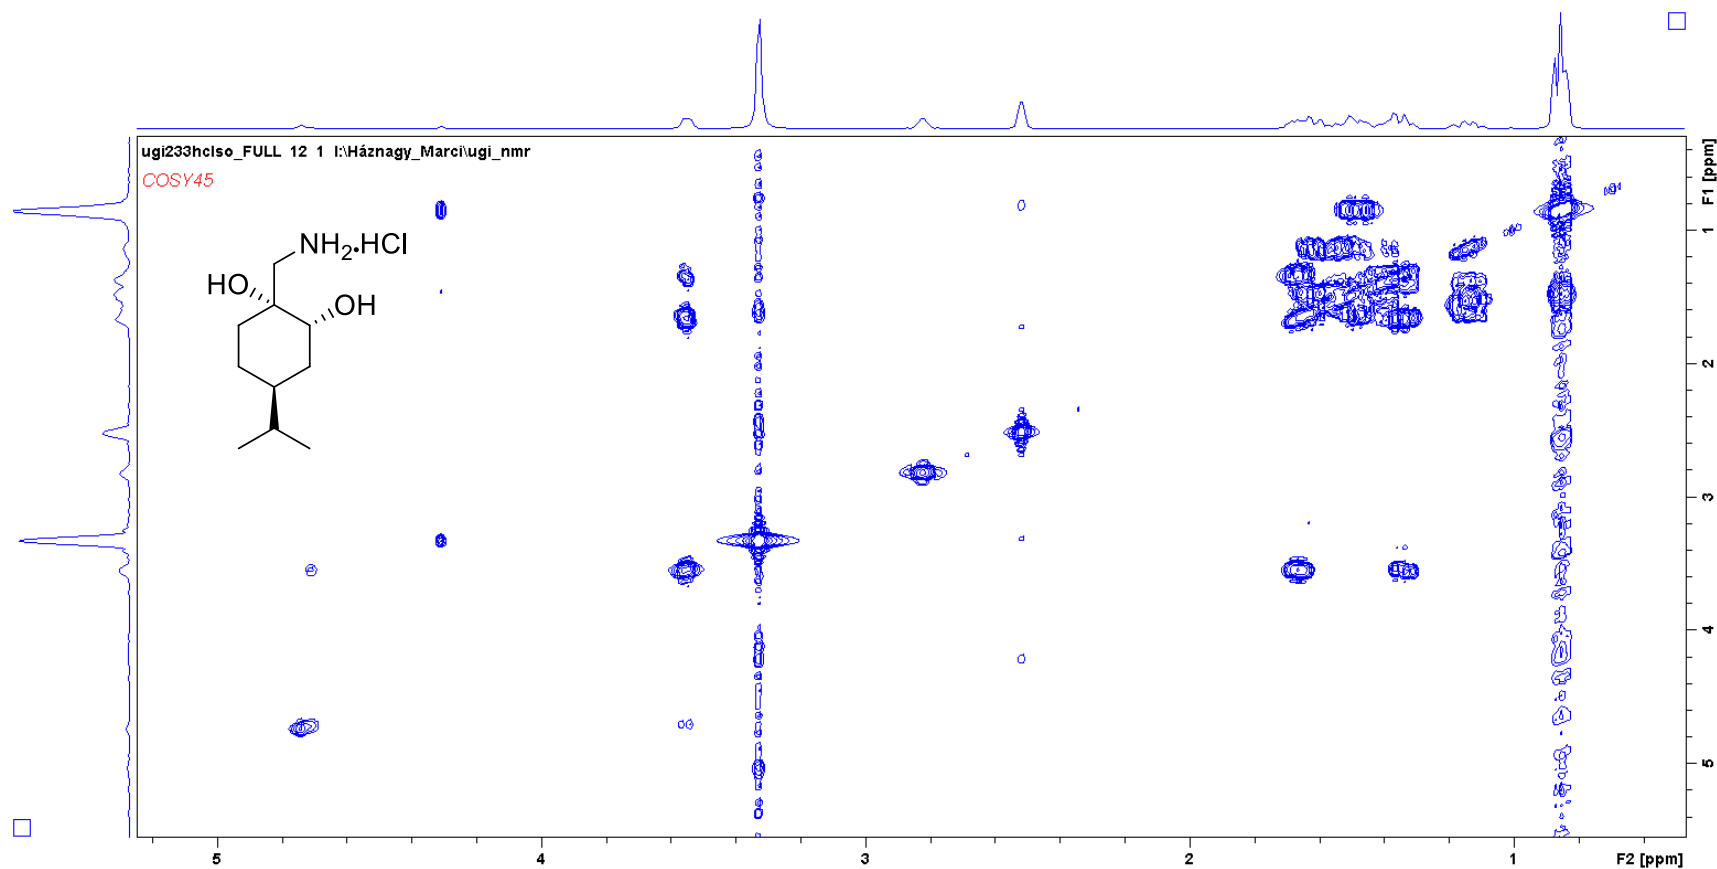

**Figure S 70: HSQC NMR of compound (1*R*,2*R*,4*S*)-1-(Aminomethyl)-4-isopropylcyclohexane-1,2-diol hydrochloride **12****

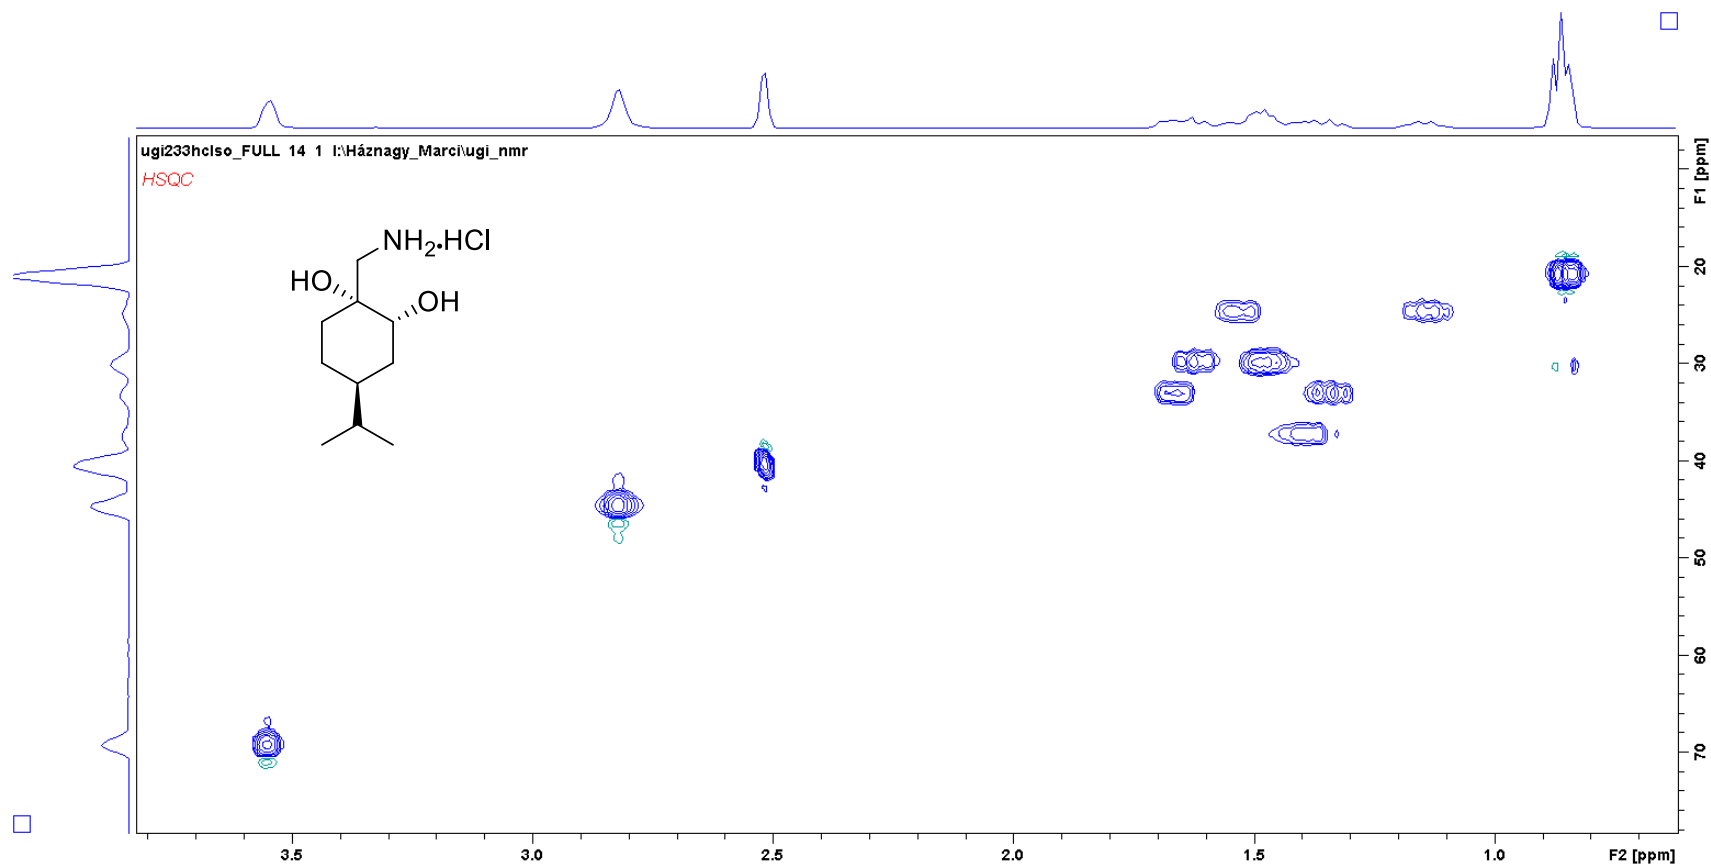

**Figure S 71: HMBC NMR of compound (1*R*,2*R*,4*S*)-1-(Aminomethyl)-4-isopropylcyclohexane-1,2-diol hydrochloride **12****

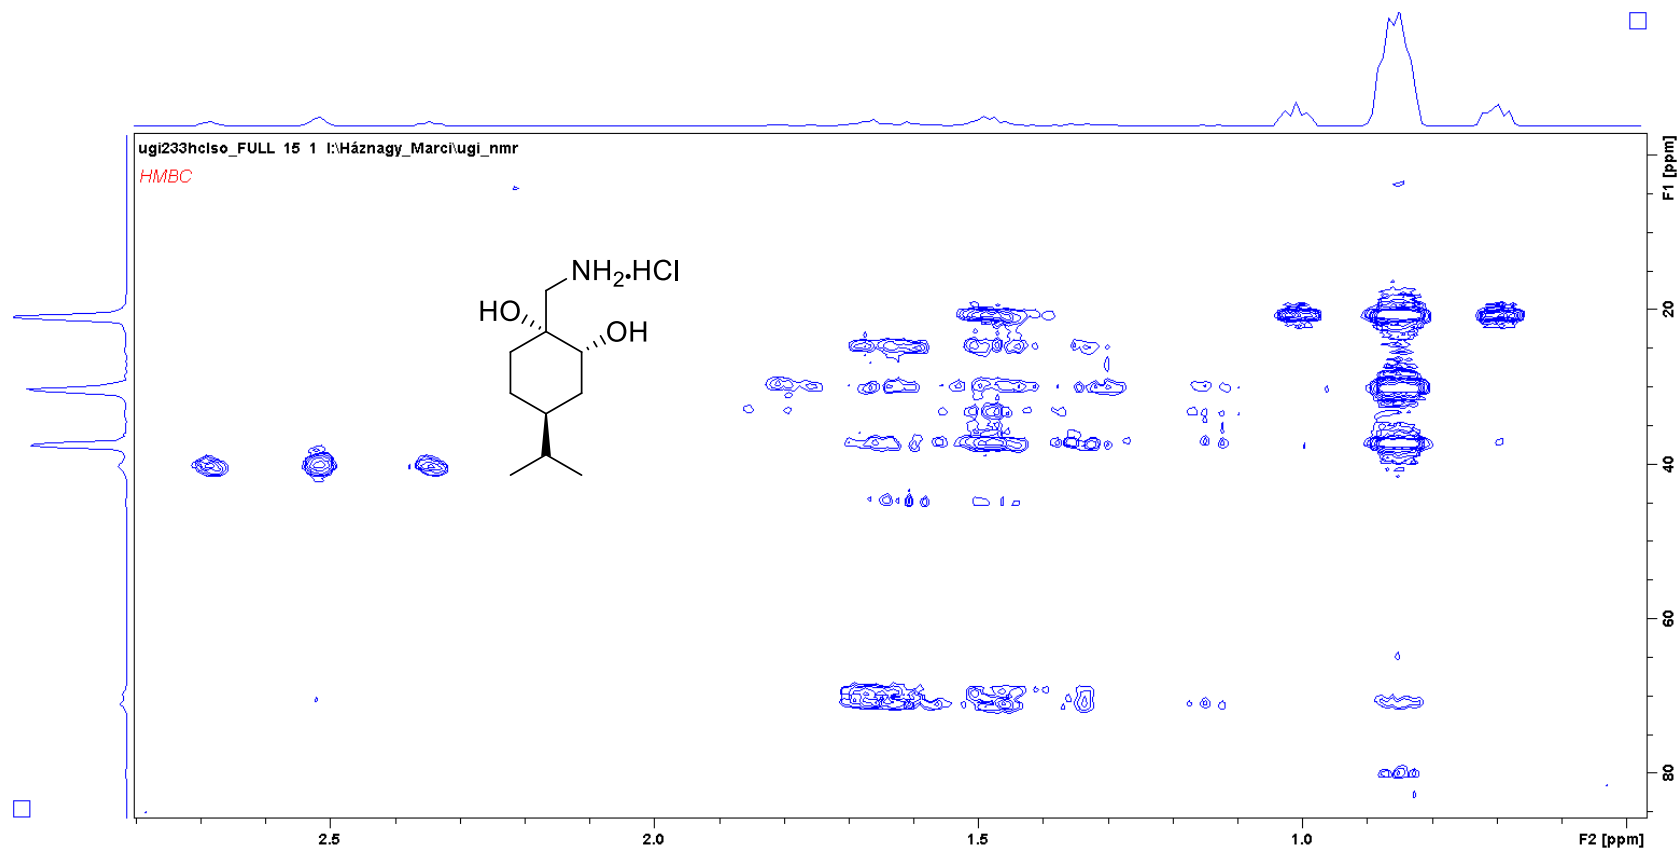

**Figure S 72:  $^1\text{H}$ -NMR of compound (1*S*,2*S*,4*S*)-1-((Benzyl(methyl)amino)methyl)-4-isopropylcyclohexane-1,2-diol **9****

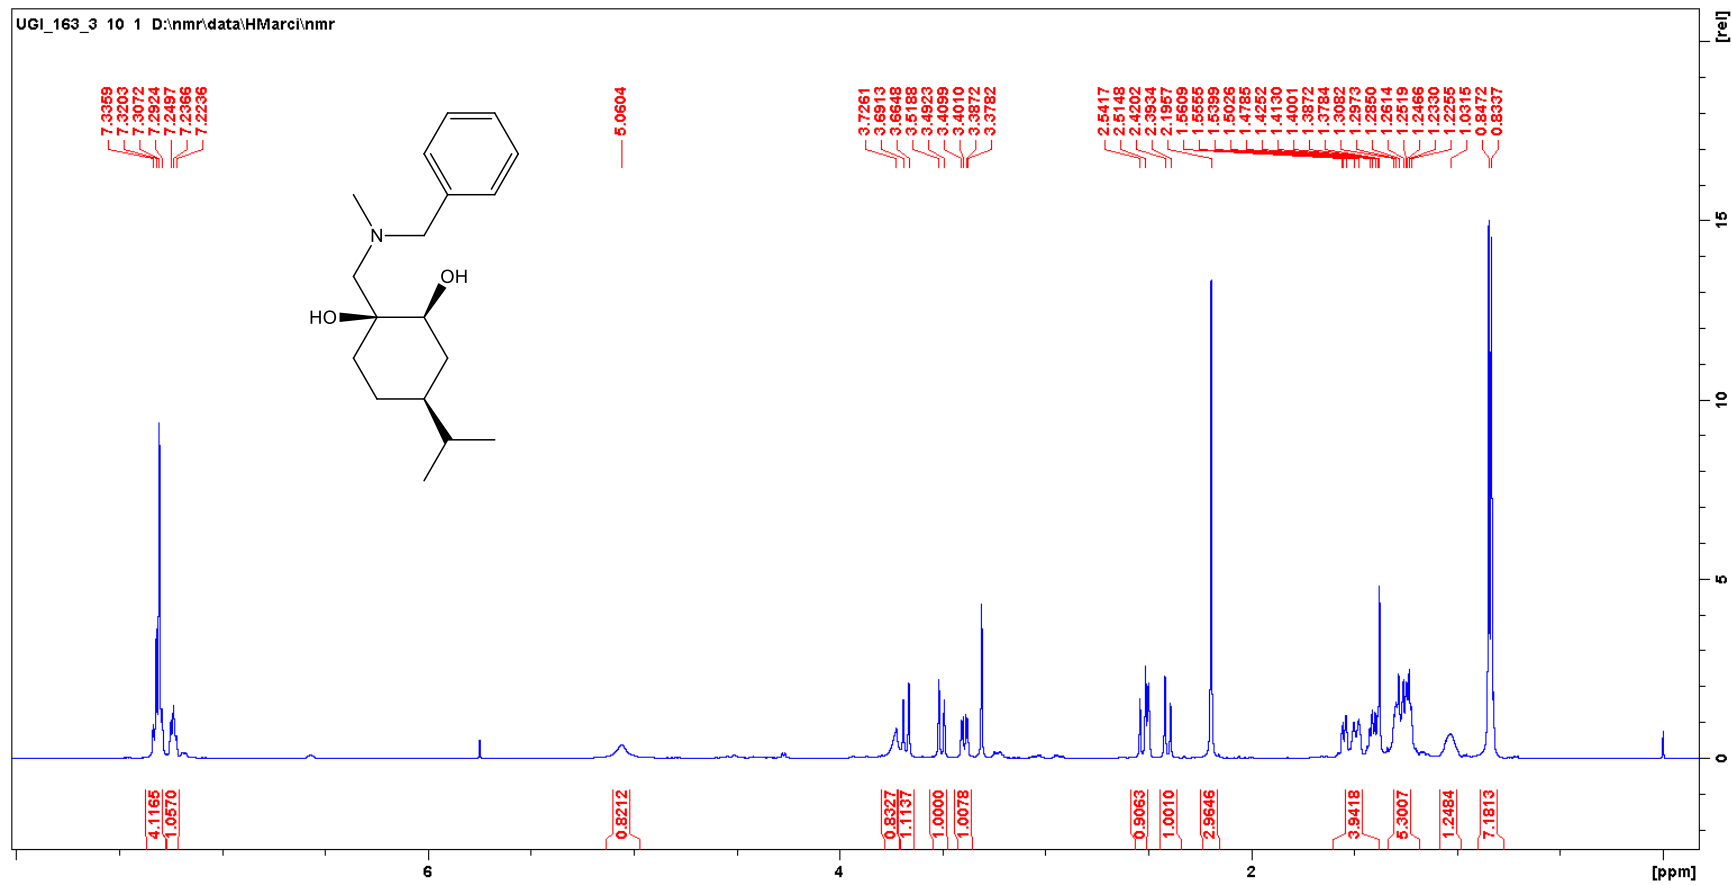

**Figure S 73:**  $^{13}\text{C}$ -NMR of compound (1*S*,2*S*,4*S*)-1-((Benzyl(methyl)amino)methyl)-4-isopropylcyclohexane-1,2-diol **9**

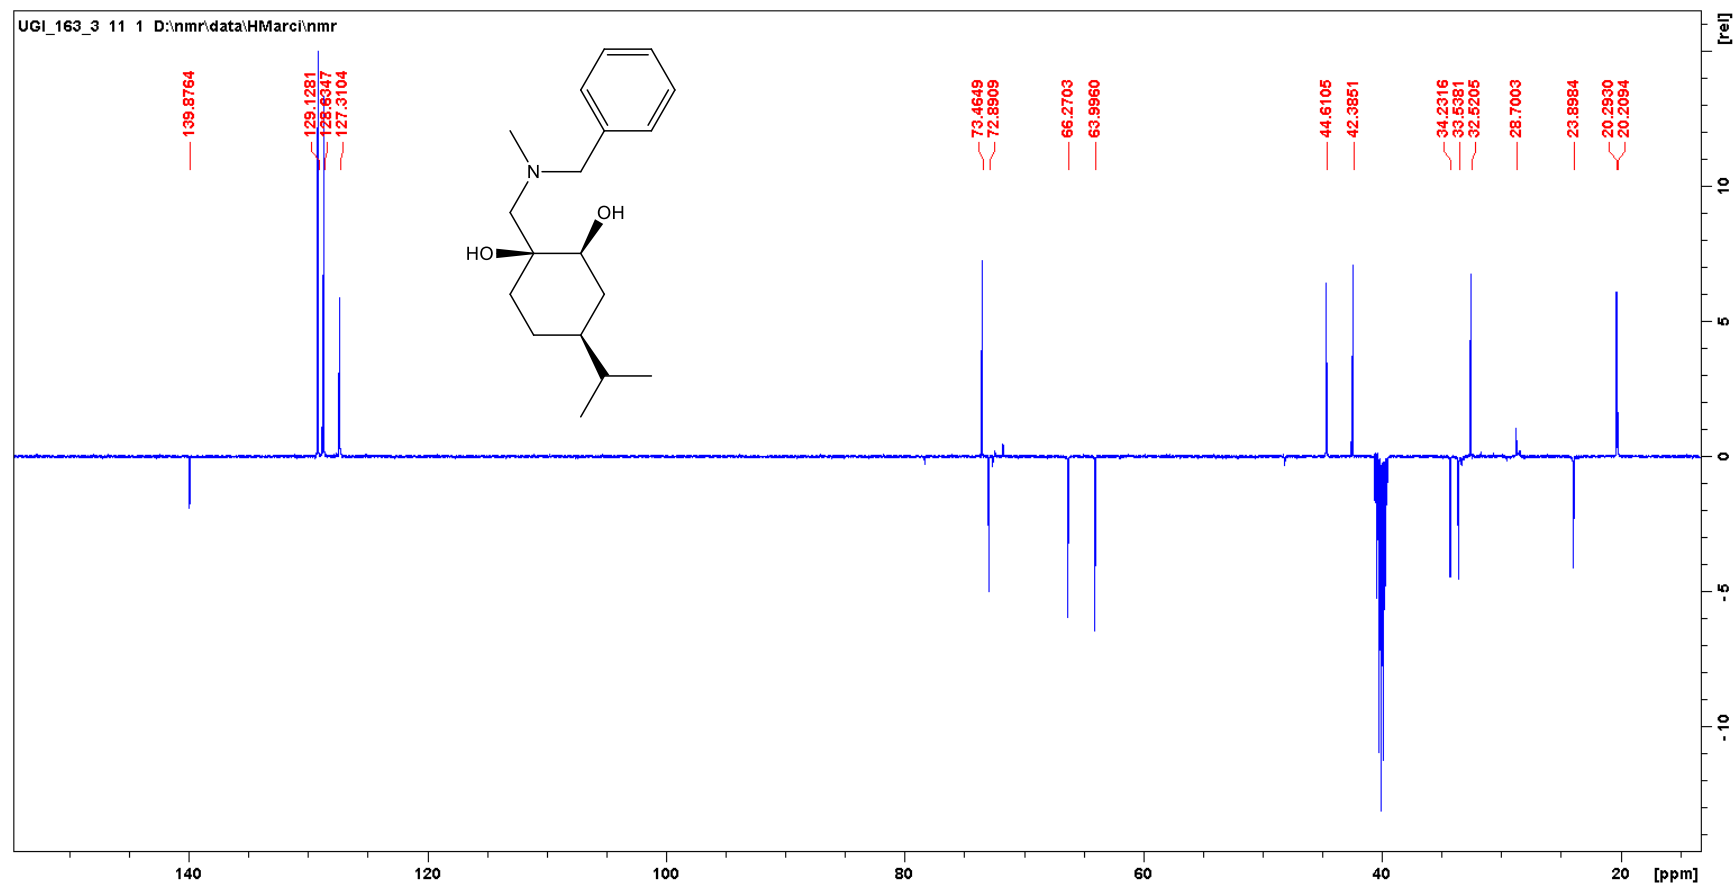

**Figure S 74:  $^1\text{H}$ -NMR of compound (1*R*,2*R*,4*S*)-1-((Benzyl(methyl)amino)methyl)-4-isopropylcyclohexane-1,2-diol **13****

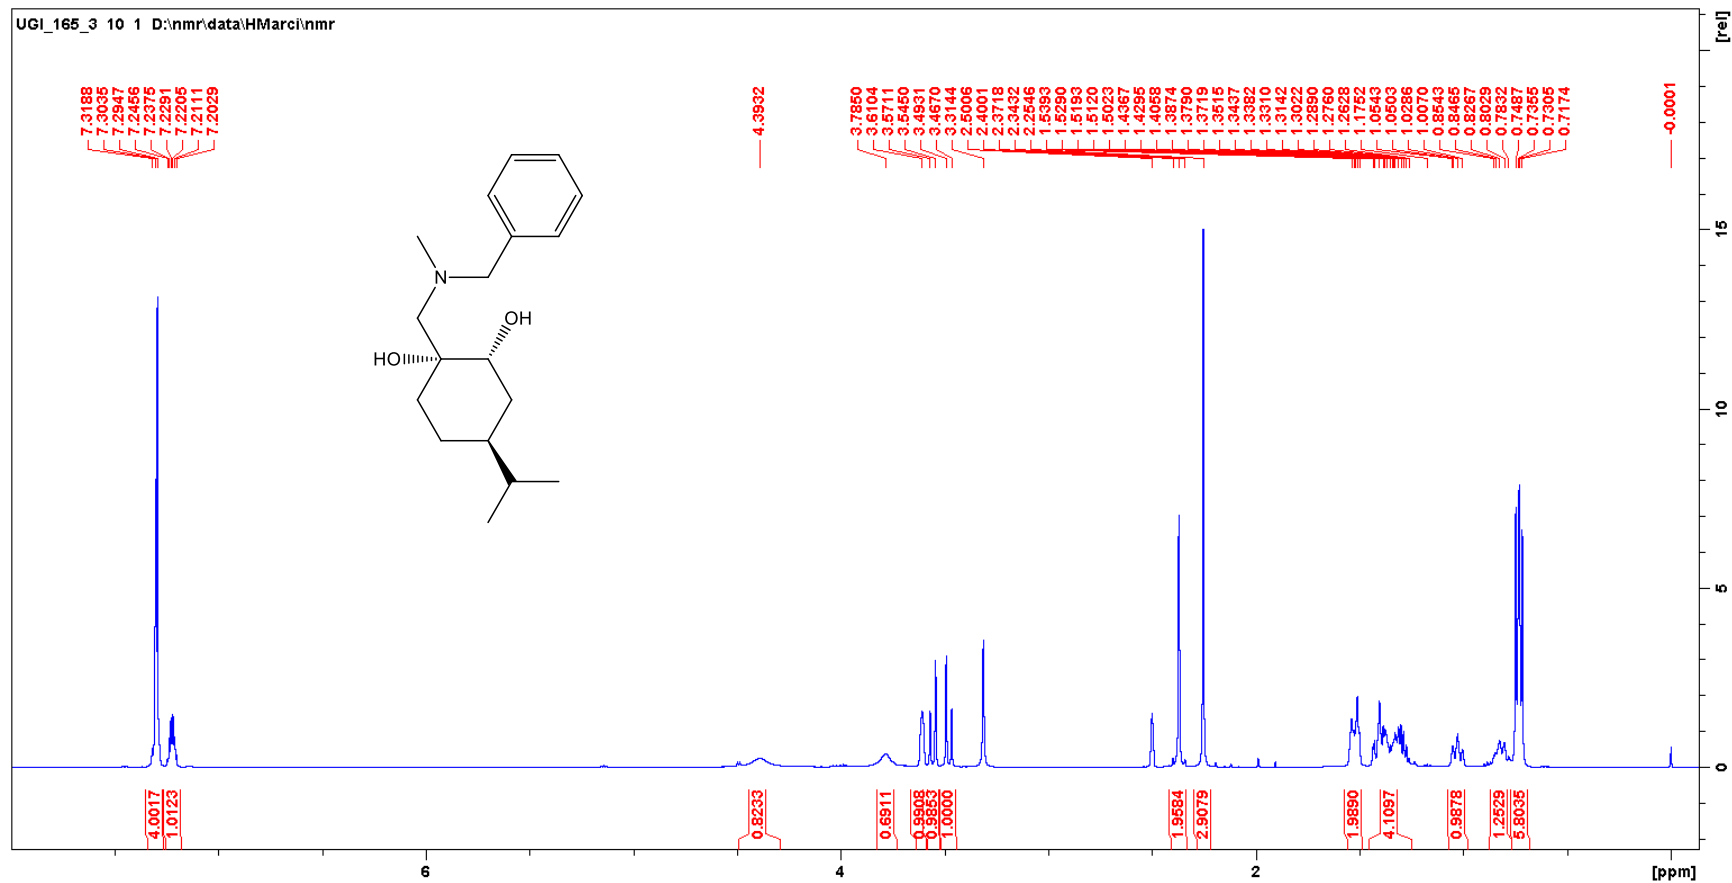

**Figure S 75:**  $^{13}\text{C}$ -NMR of compound (1*R*,2*R*,4*S*)-1-((Benzyl(methyl)amino)methyl)-4-isopropylcyclohexane-1,2-diol **13**

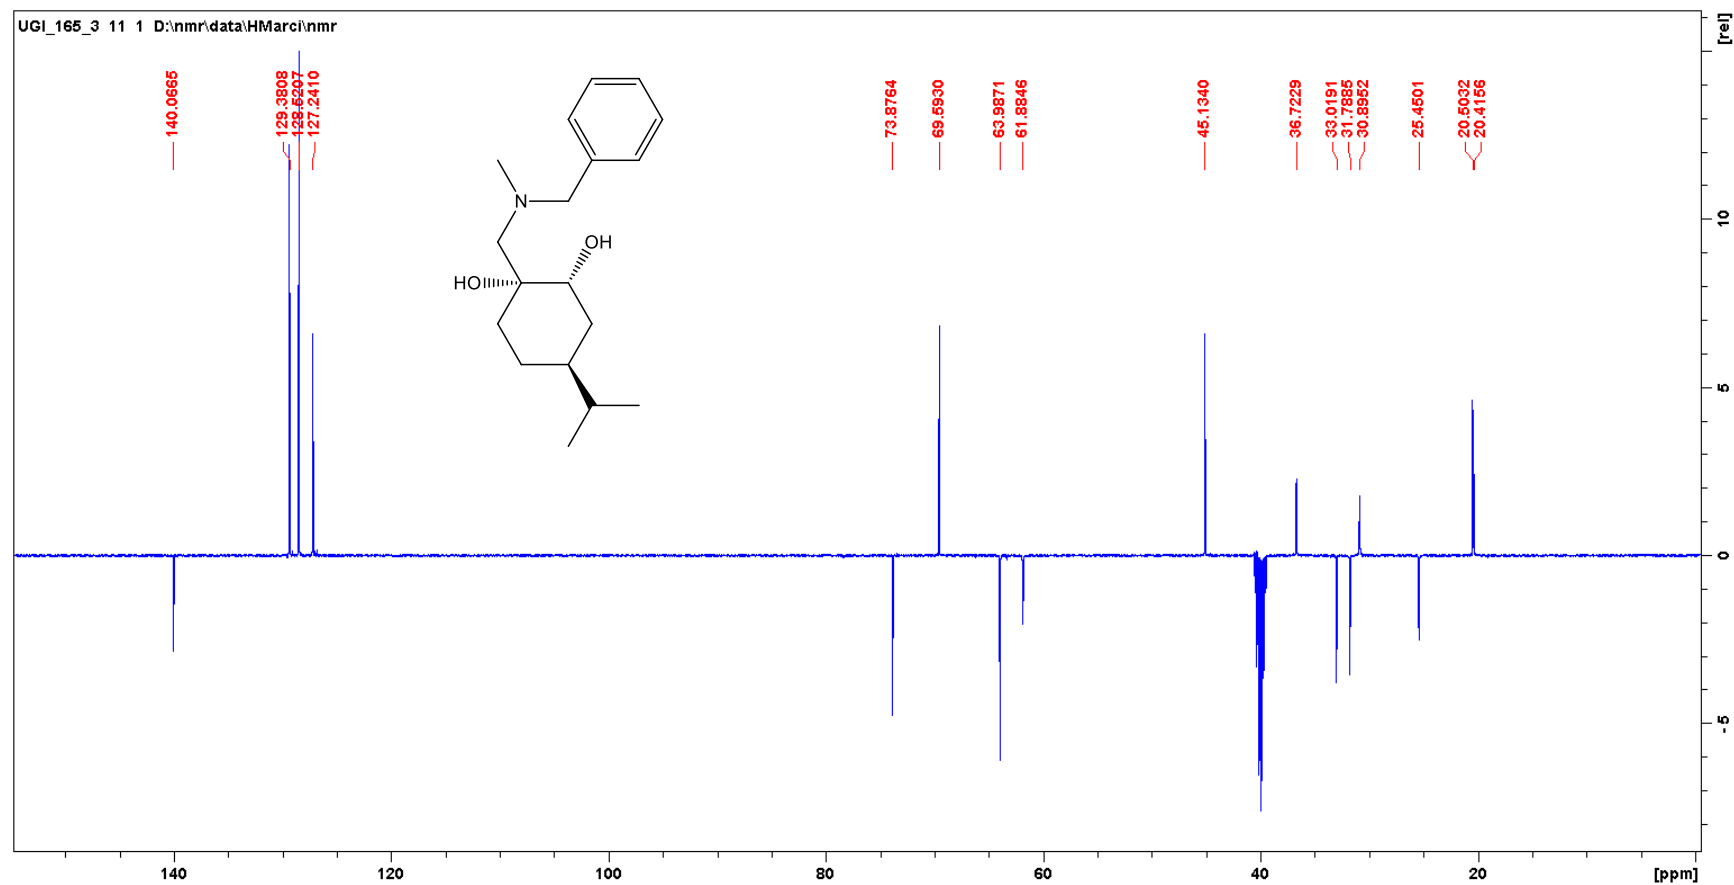



**Figure S 76:  $^1\text{H}$ -NMR of compound (4a*S*,7*S*,8a*S*)-3-Benzyl-7-isopropyloctahydro-2*H*-benzo[*e*][1,3]oxazin-4a-ol **10a****

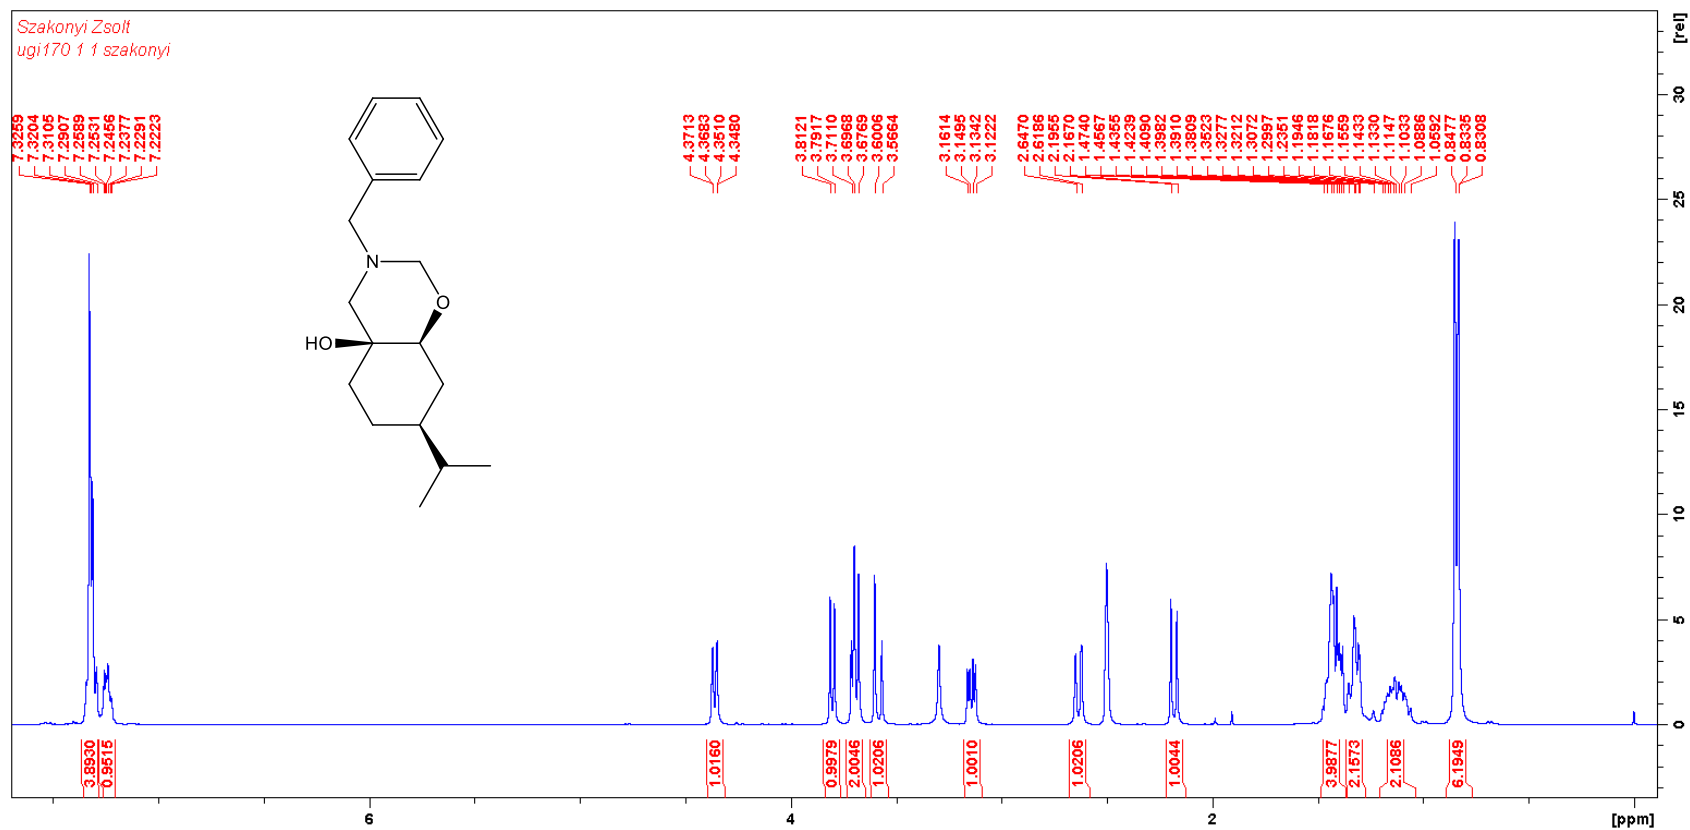

**Figure S 77:**  $^{13}\text{C}$ -NMR of compound (4a*S*,7*S*,8a*S*)-3-Benzyl-7-isopropyloctahydro-2*H*-benzo[*e*][1,3]oxazin-4a-ol **10a**

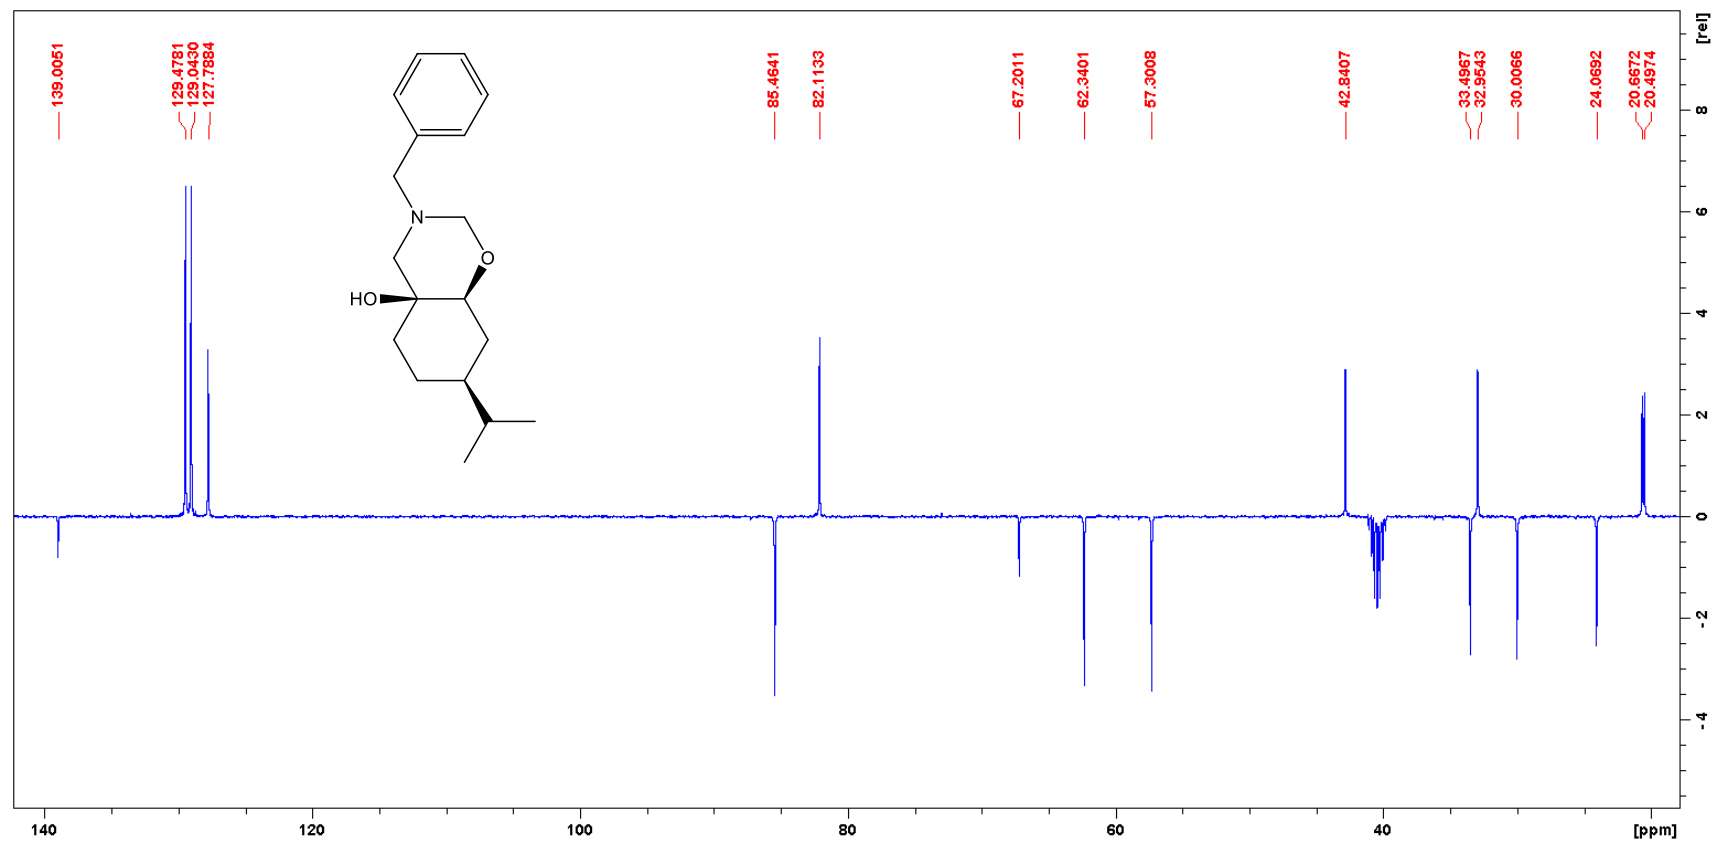

**Figure S 78: COSY NMR of compound (4a*S*,7*S*,8a*S*)-3-Benzyl-7-isopropyloctahydro-2*H*-benzo[*e*][1,3]oxazin-4a-ol **10a****

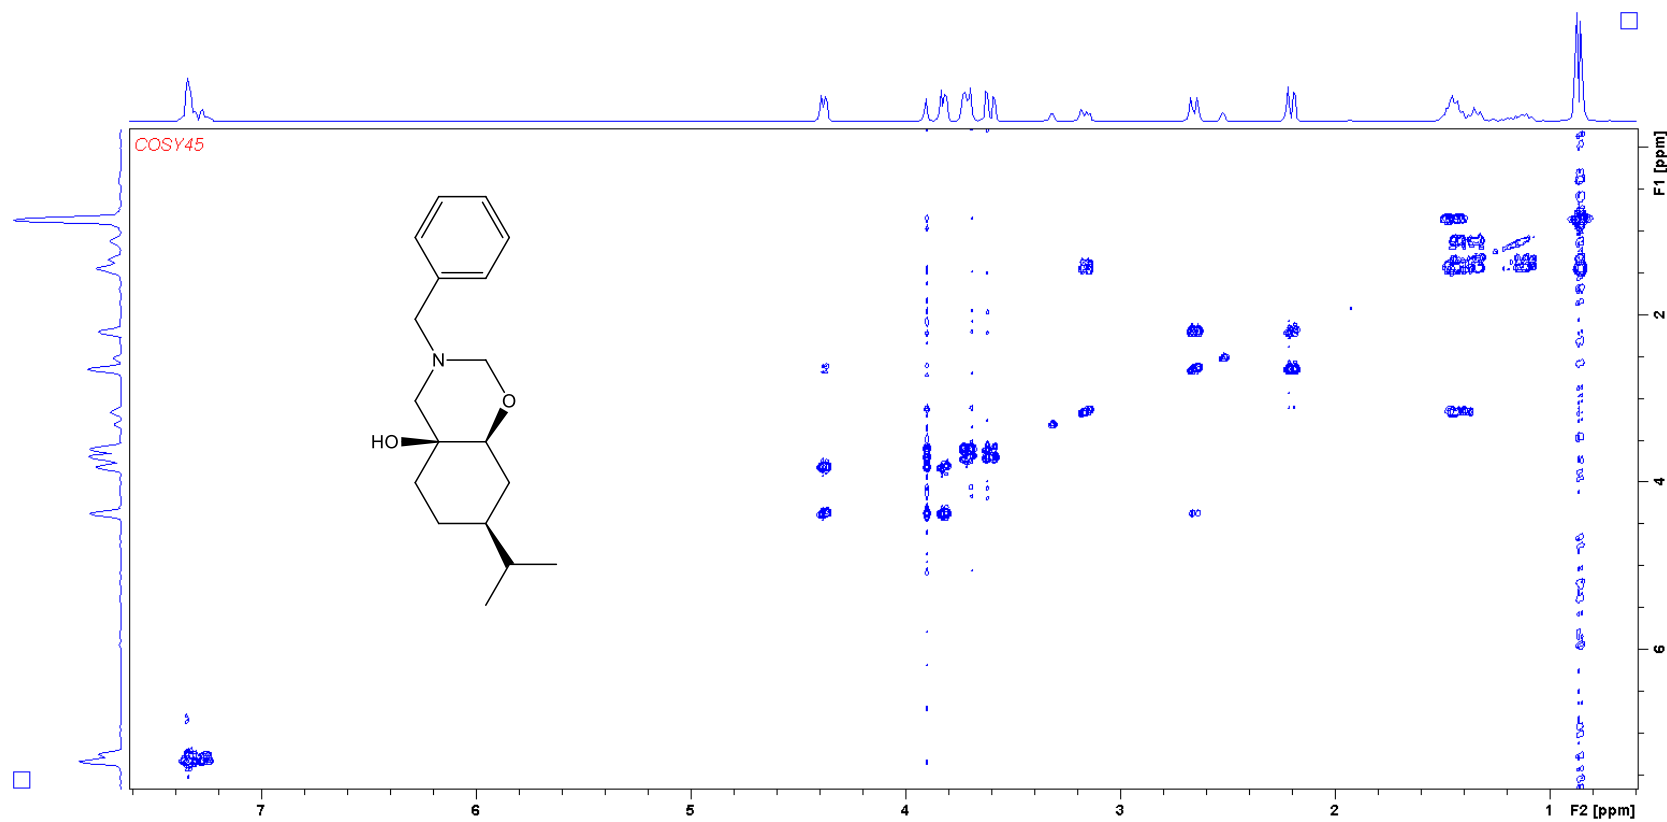

**Figure S 79: NOESY NMR of compound (4a*S*,7*S*,8a*S*)-3-Benzyl-7-isopropyloctahydro-2*H*-benzo[*e*][1,3]oxazin-4a-ol **10a****

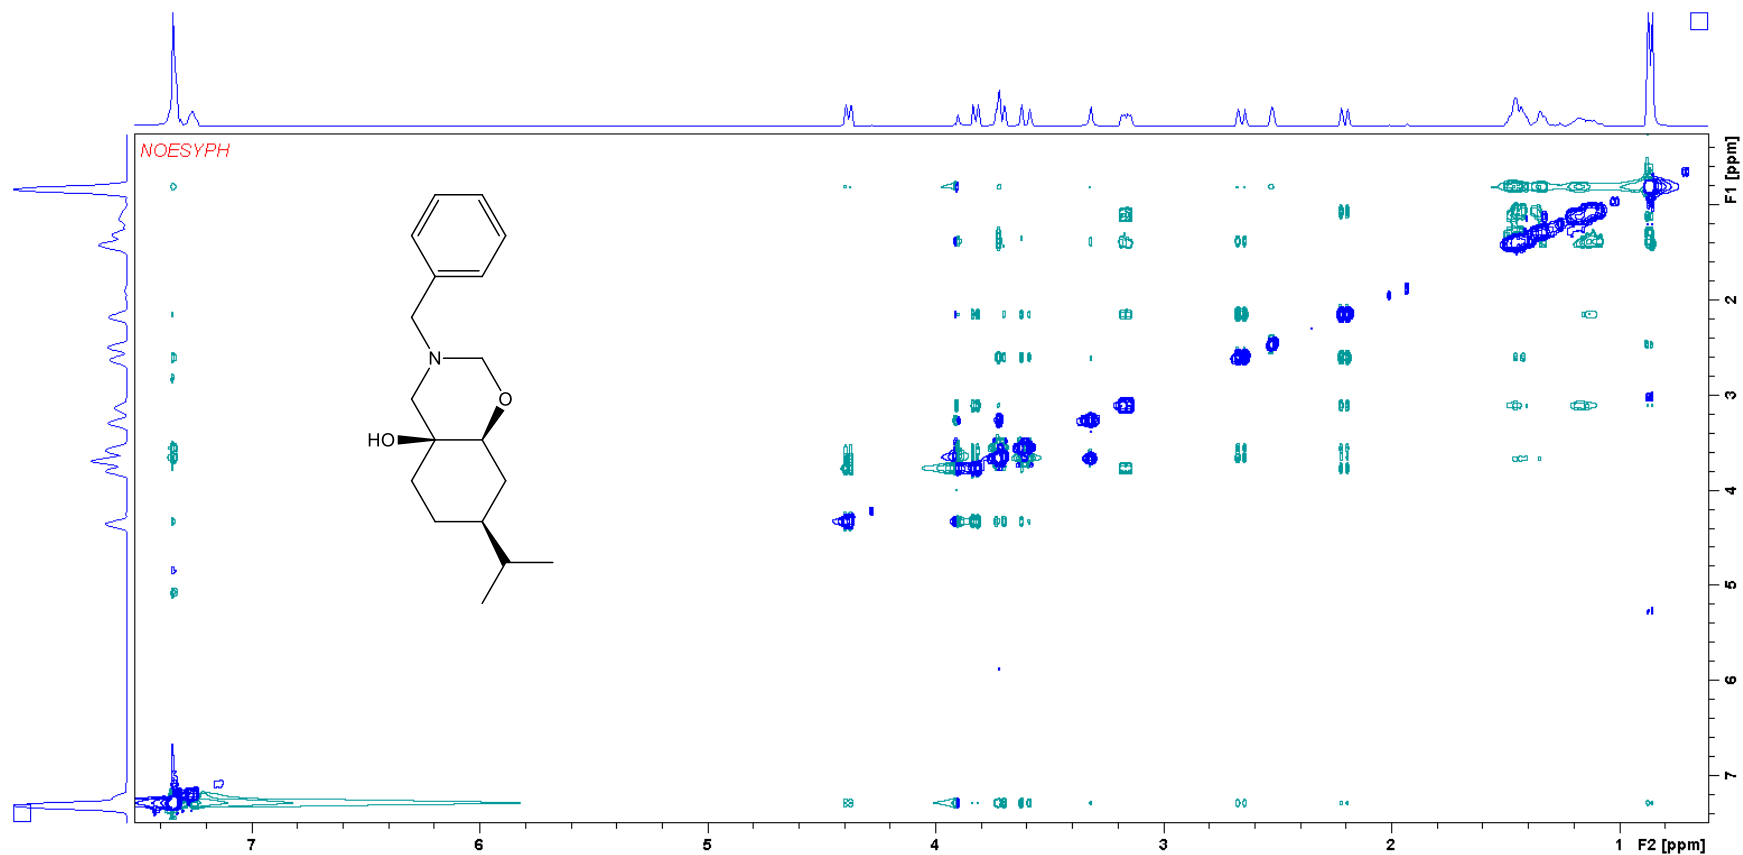

Figure S 80: HSQC NMR of compound (4a*S*,7*S*,8a*S*)-3-Benzyl-7-isopropyloctahydro-2*H*-benzo[*e*][1,3]oxazin-4a-ol **10a**

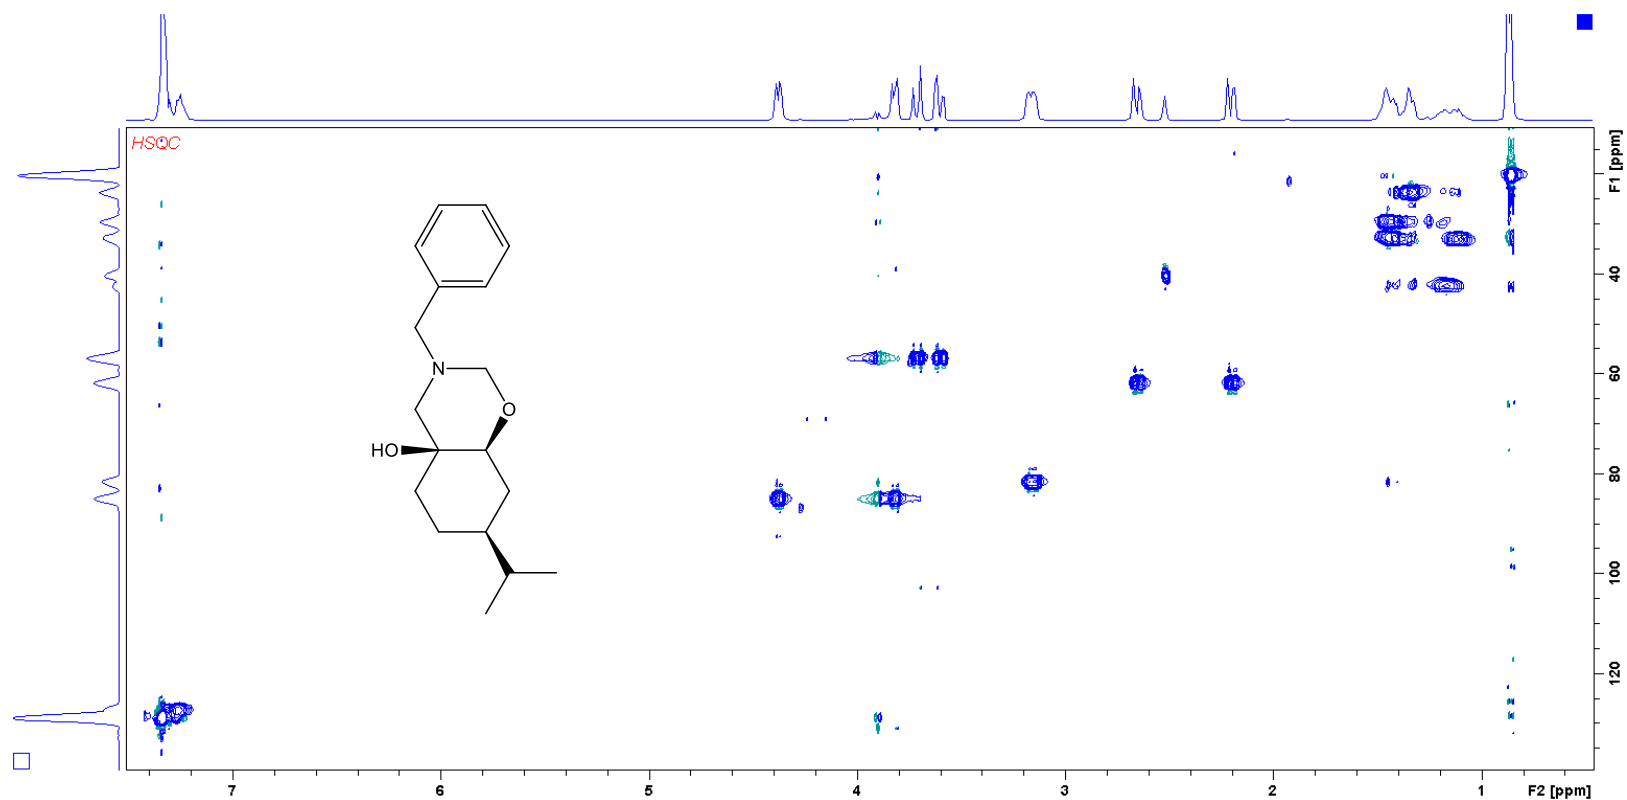

**Figure S 81: HMBC NMR of compound (4aS,7S,8aS)-3-Benzyl-7-isopropyloctahydro-2H-benzo[e][1,3]oxazin-4a-ol 10a**

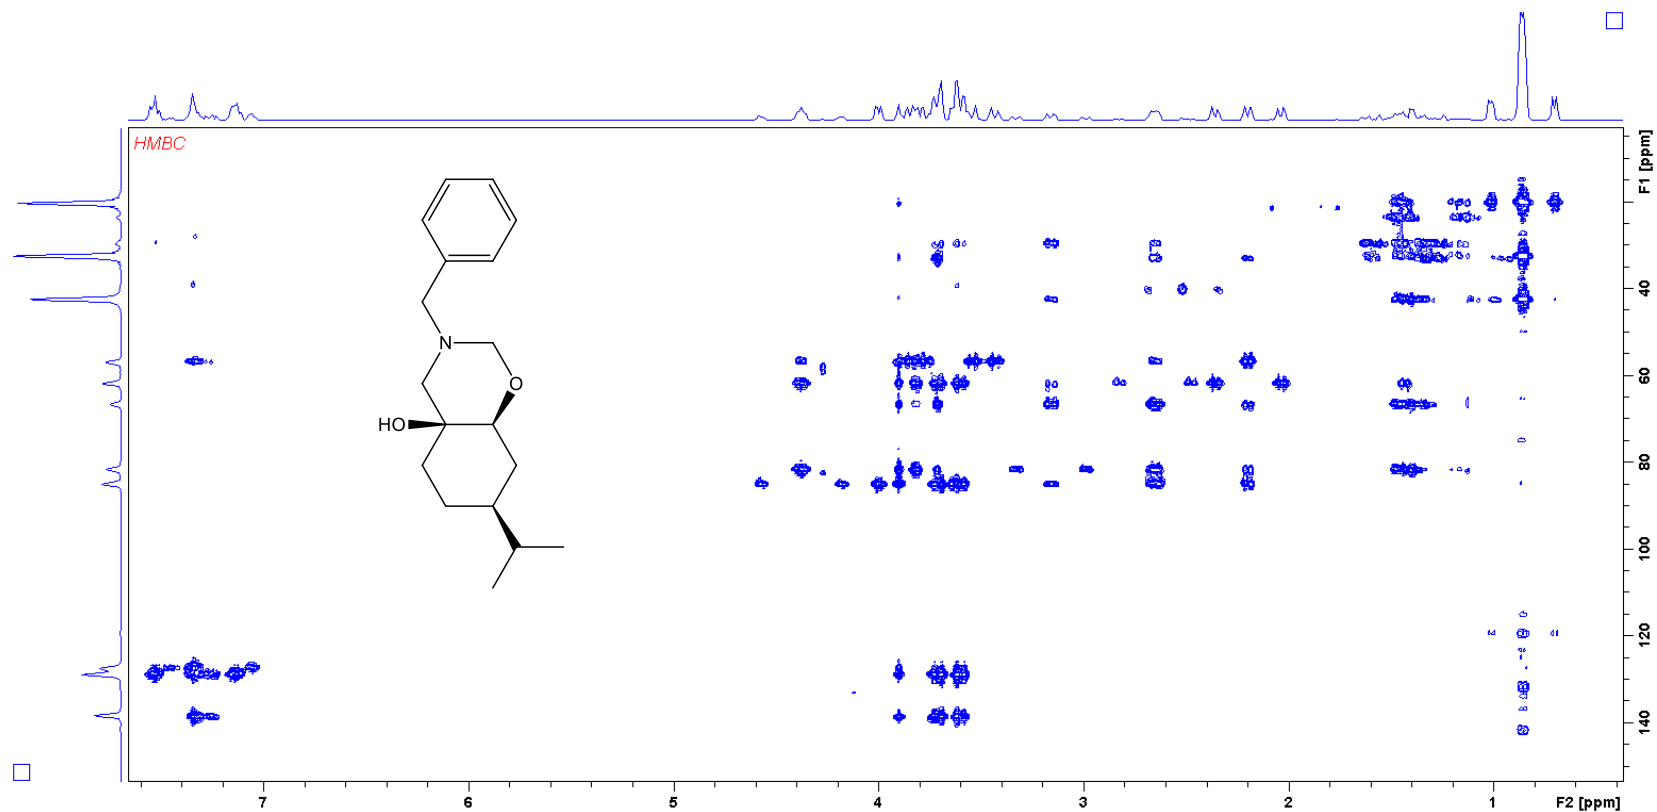

**Figure S 82:  $^1\text{H}$ -NMR of compound (4a*S*,7*S*,8a*S*)-7-Isopropyl-3-((*S*)-1-phenylethyl)octahydro-2*H*-benzo[*e*][1,3]oxazin-4a-ol **10b****

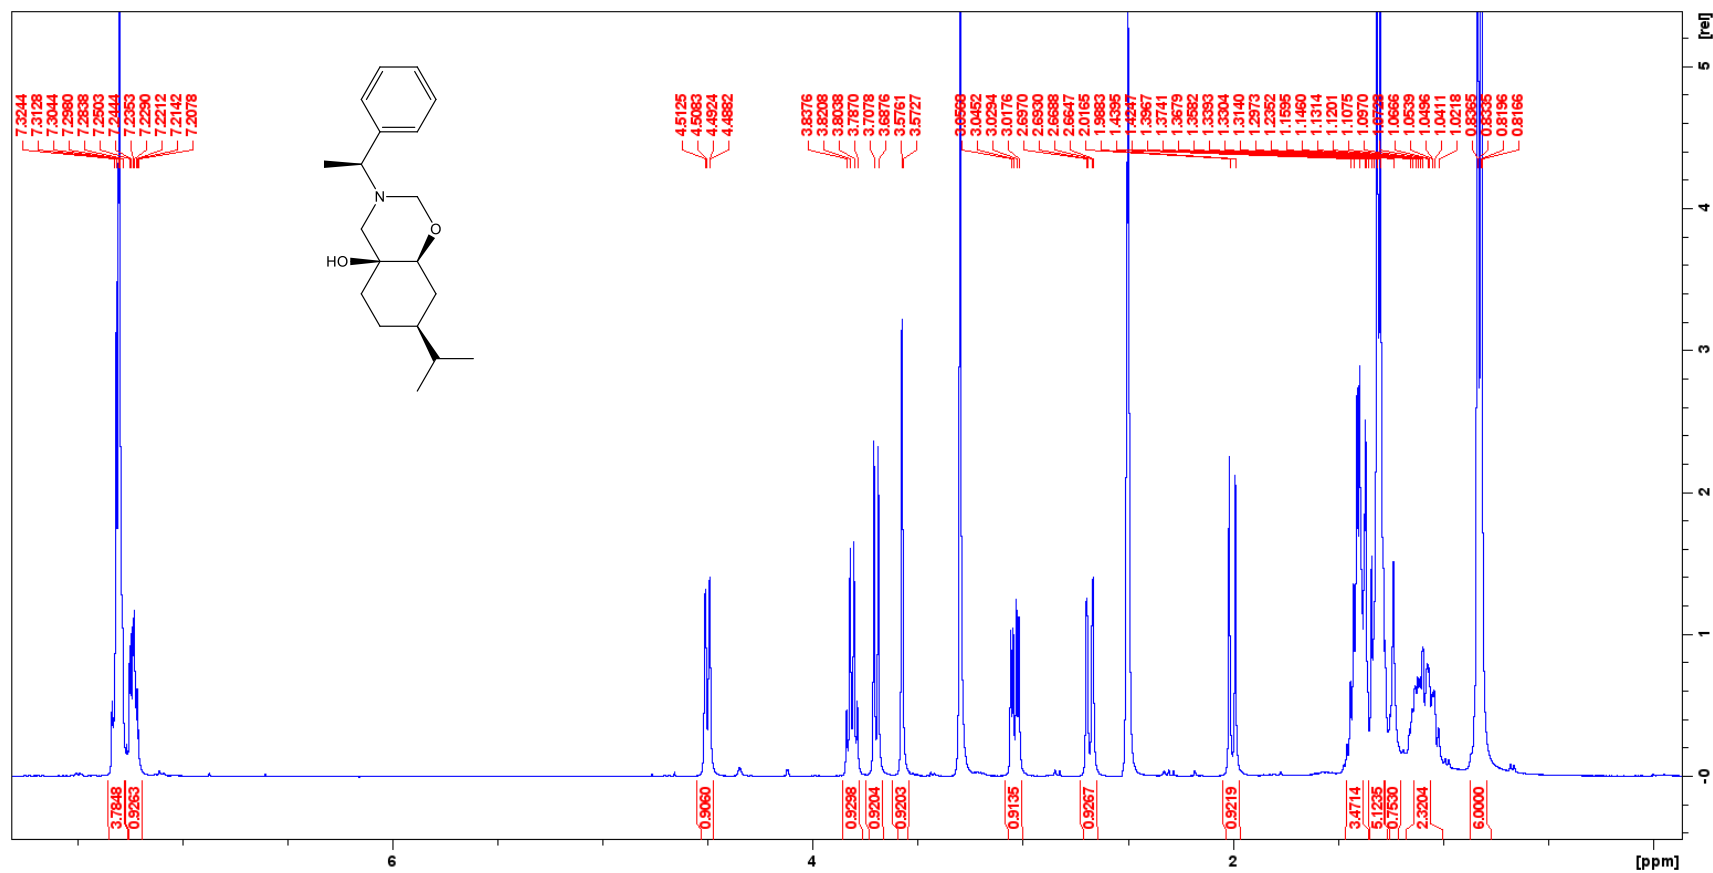

**Figure S 83:  $^{13}\text{C}$ -NMR of compound (4a*S*,7*S*,8a*S*)-7-Isopropyl-3-((*S*)-1-phenylethyl)octahydro-2*H*-benzo[*e*][1,3]oxazin-4a-ol **10b****

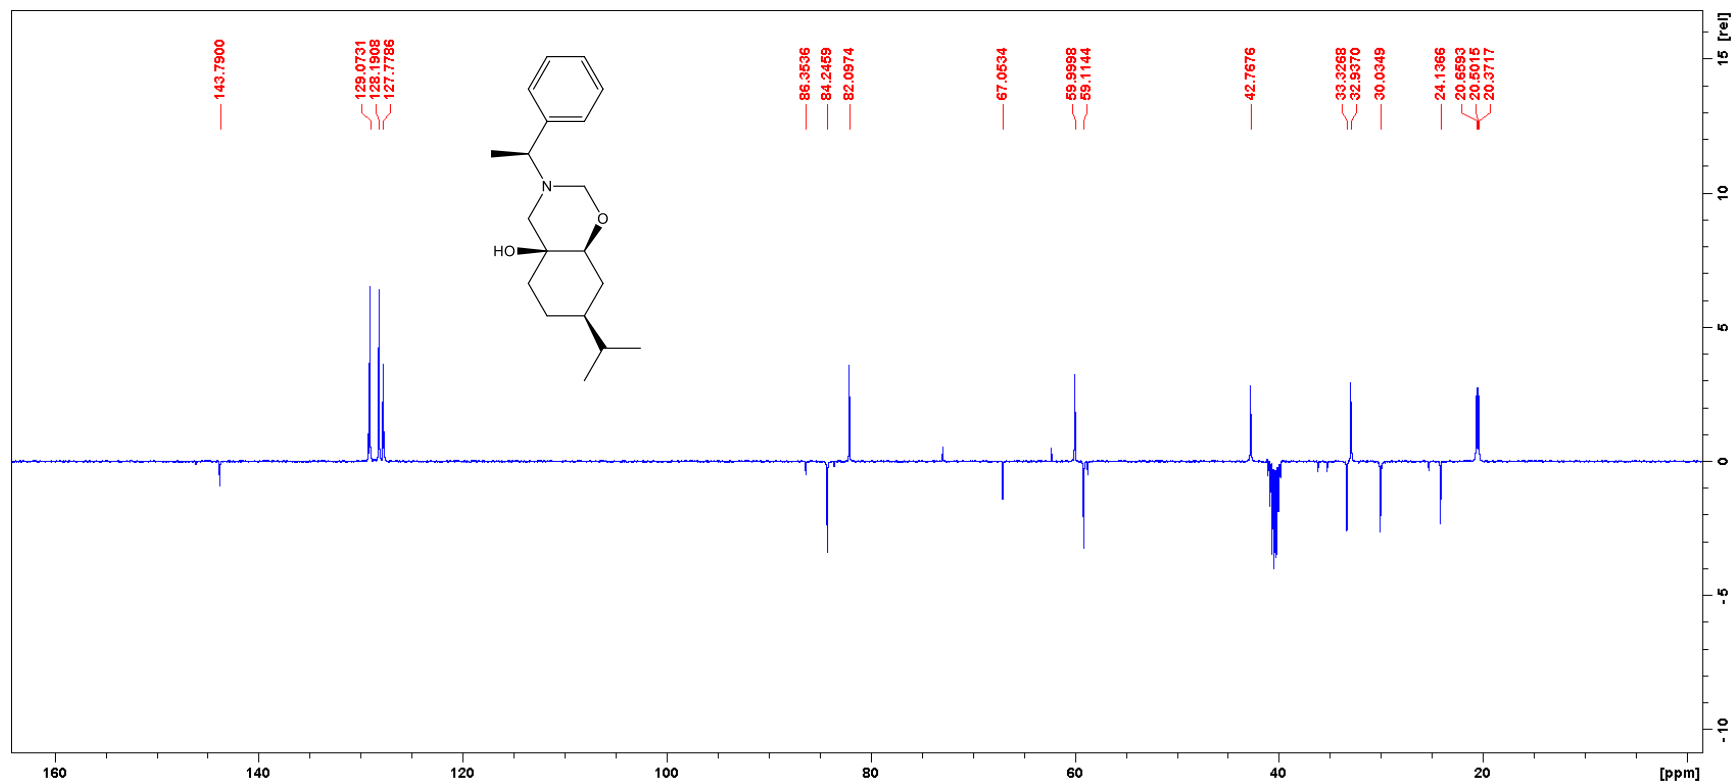



**Figure S 84: COSY NMR of compound (4a*S*,7*S*,8a*S*)-7-Isopropyl-3-((*S*)-1-phenylethyl)octahydro-2*H*-benzo[*e*][1,3]oxazin-4a-ol **10b****

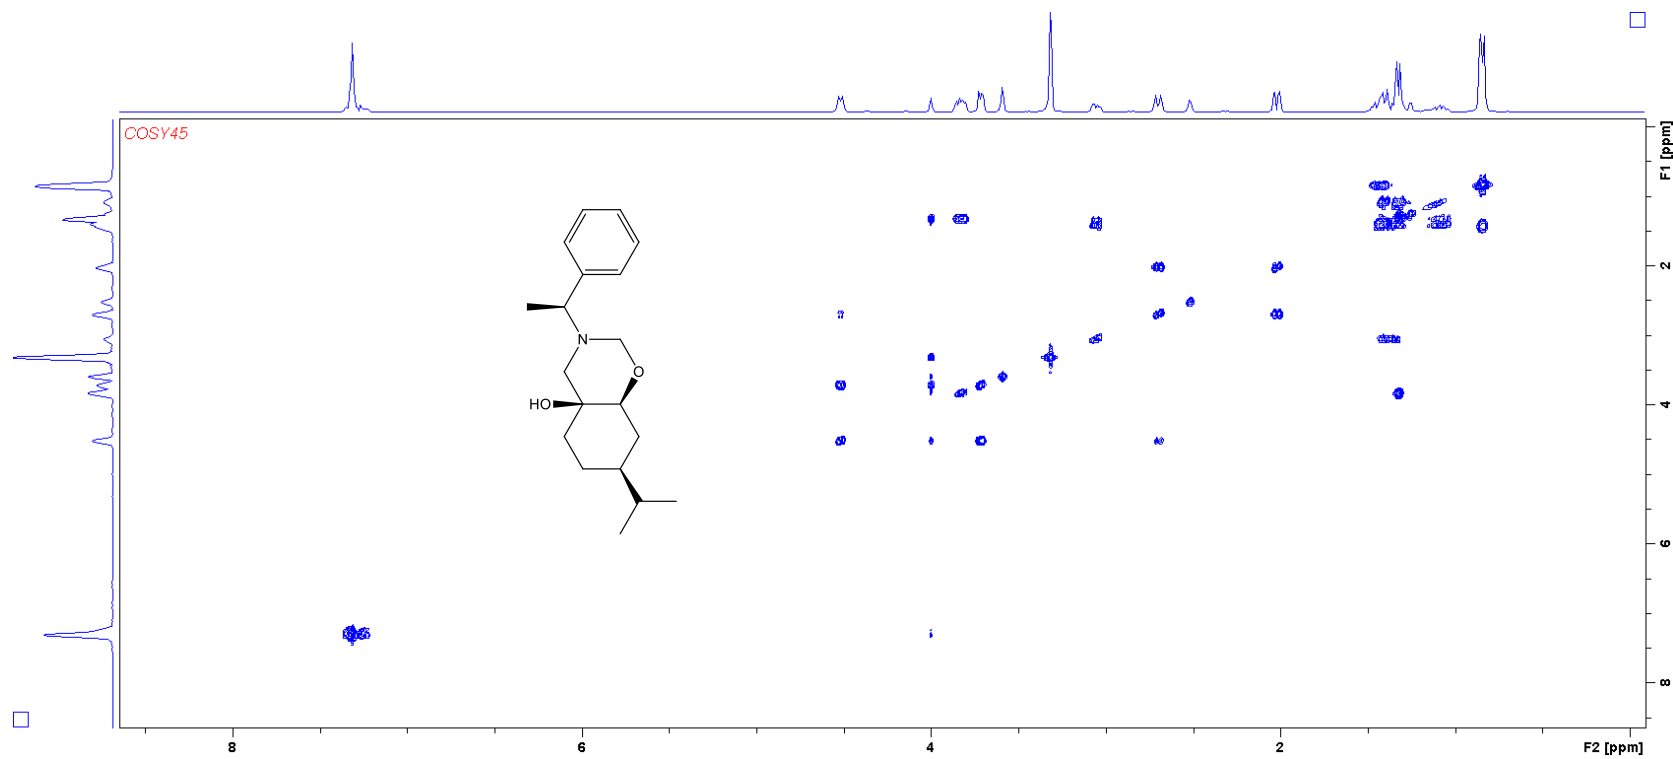

**Figure S 85: HSQC NMR of compound (4a*S*,7*S*,8a*S*)-7-Isopropyl-3-((*S*)-1-phenylethyl)octahydro-2*H*-benzo[*e*][1,3]oxazin-4a-ol **10b****

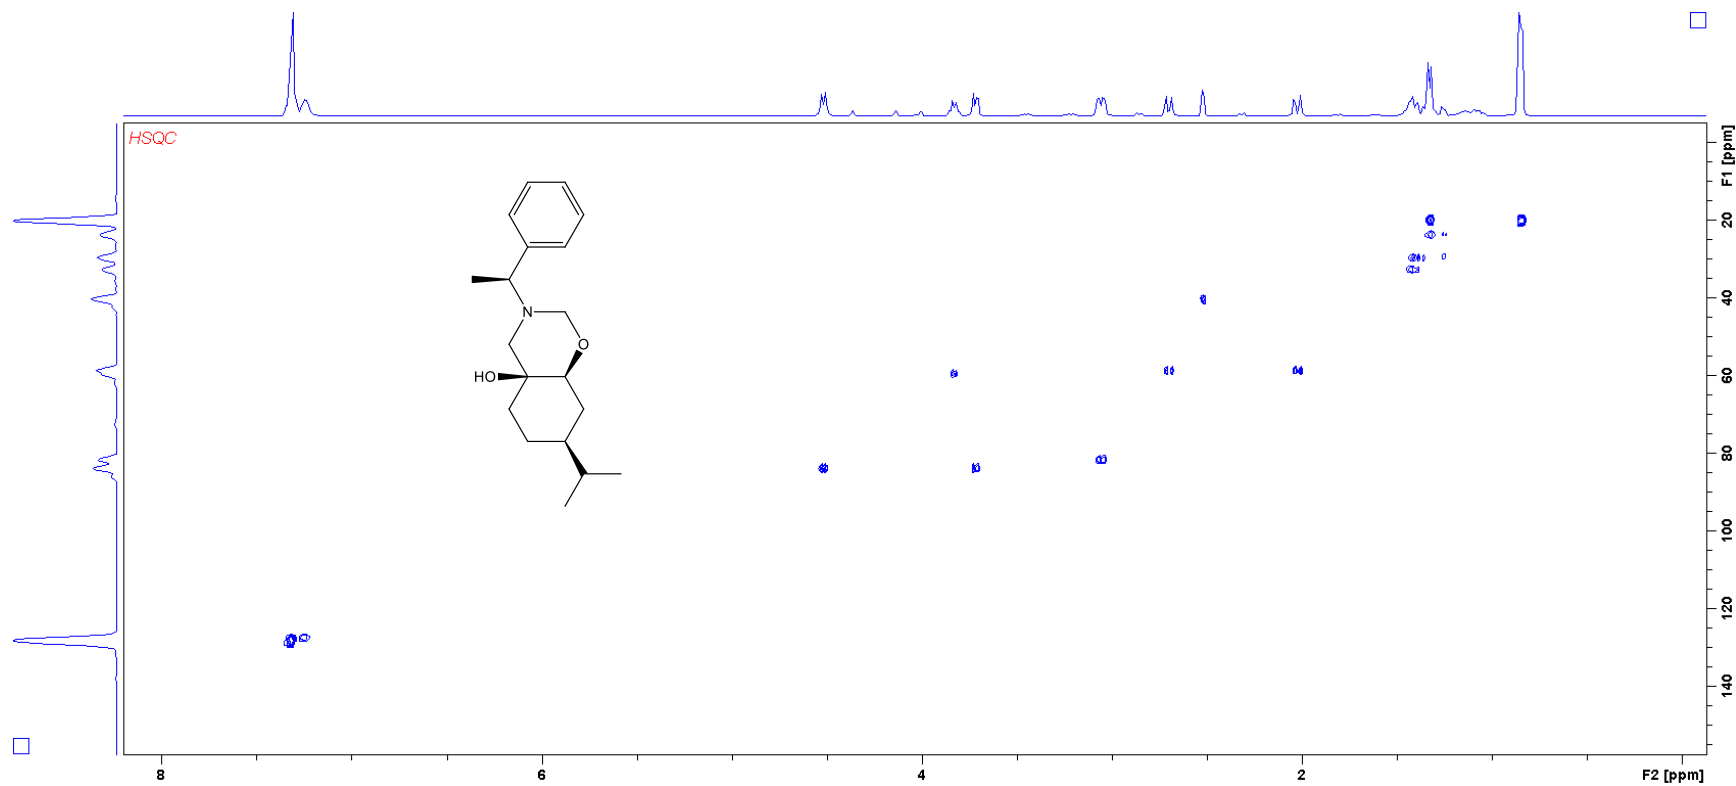

**Figure S 86: HMBC NMR of compound (4a*S*,7*S*,8a*S*)-7-Isopropyl-3-((*S*)-1-phenylethyl)octahydro-2*H*-benzo[*e*][1,3]oxazin-4a-ol **10b****

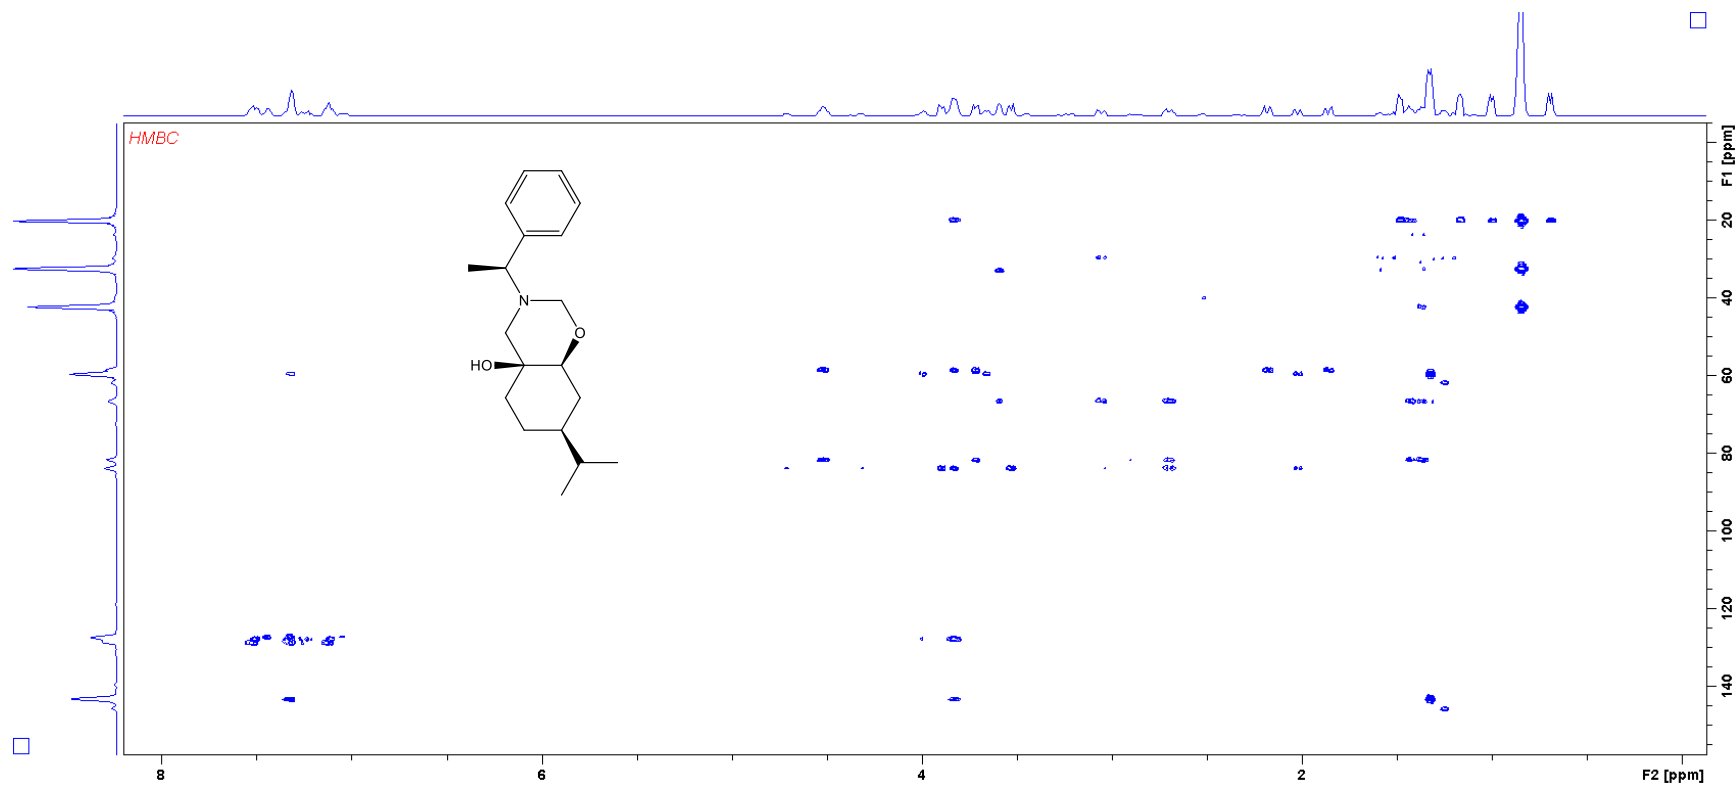

**Figure S 87:  $^1\text{H}$ -NMR of compound (4a*S*,7*S*,8a*S*)-7-Isopropyl-3-((*R*)-1-phenylethyl)octahydro-2*H*-benzo[*e*][1,3]oxazin-4a-ol **10c****

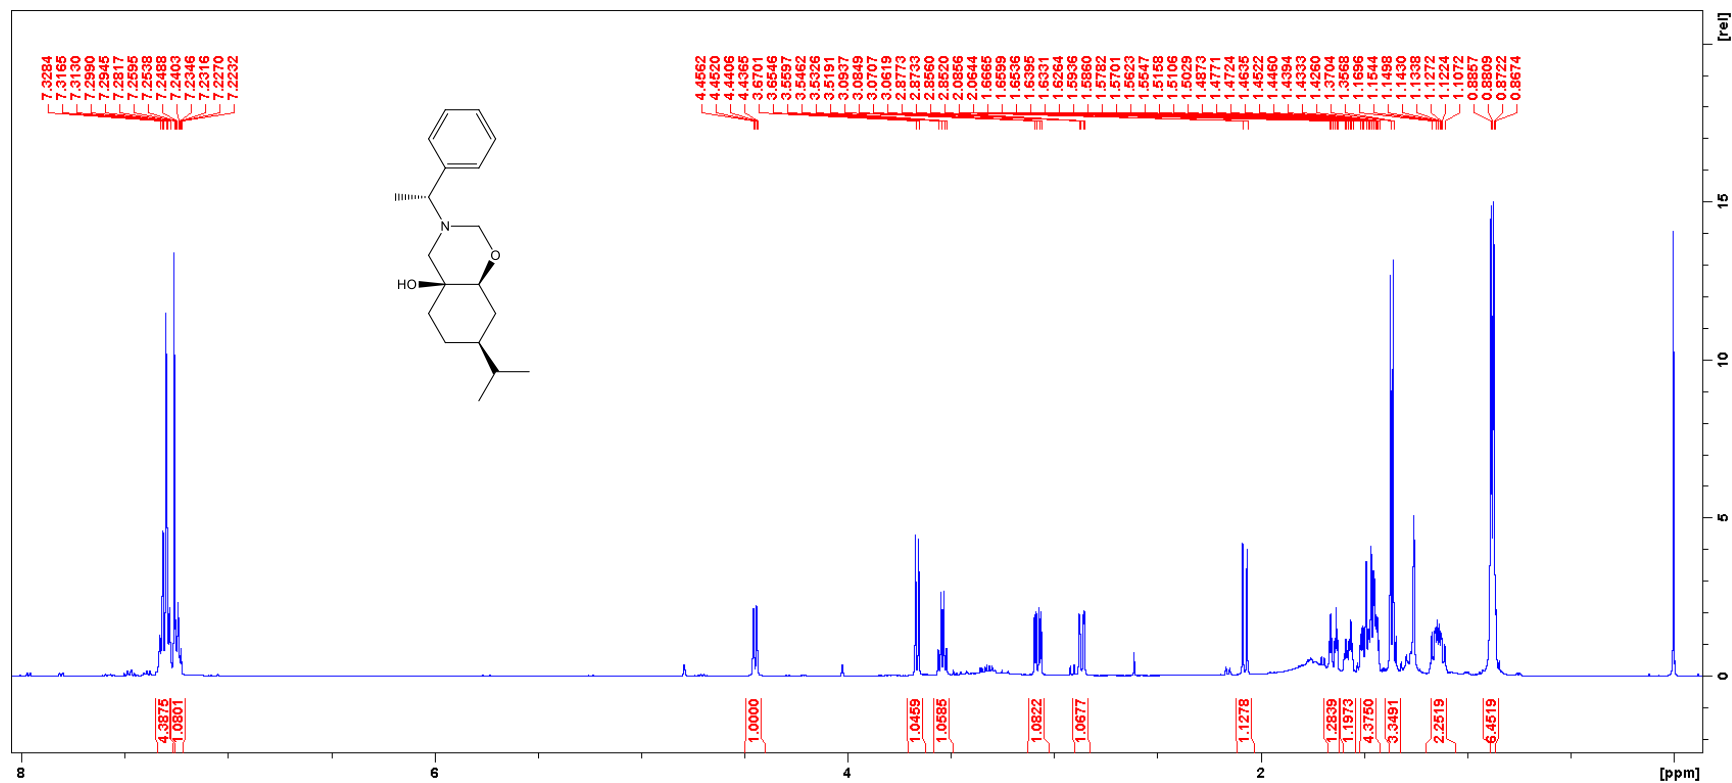

**Figure S 88:**  $^{13}\text{C}$ -NMR of compound (4a*S*,7*S*,8a*S*)-7-Isopropyl-3-((*R*)-1-phenylethyl)octahydro-2*H*-benzo[*e*][1,3]oxazin-4a-ol **10c**

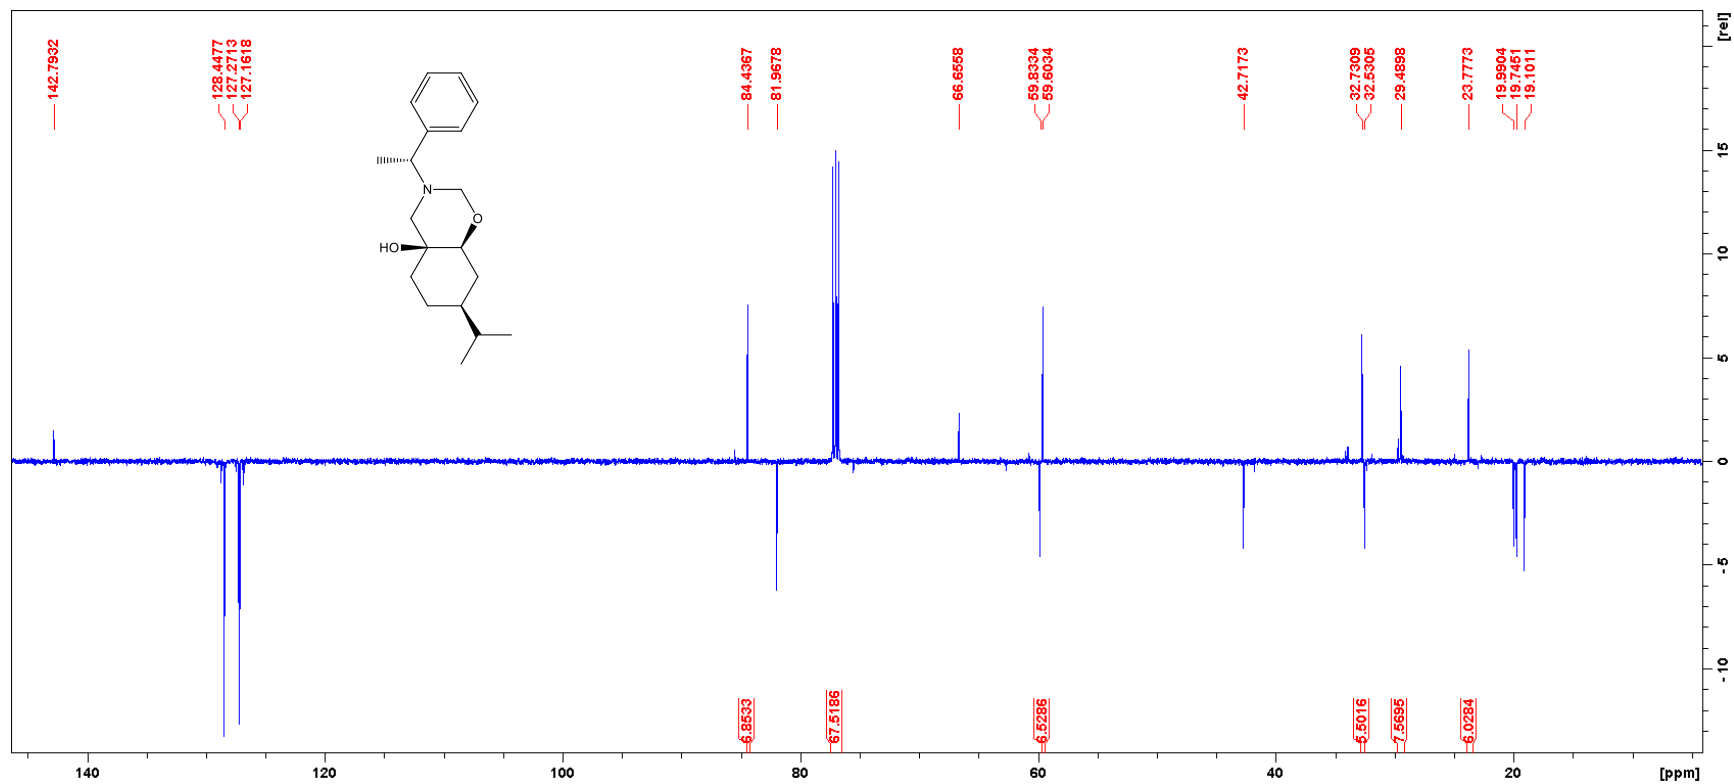

**Figure S 89: COSY NMR of compound (4a*S*,7*S*,8a*S*)-7-Isopropyl-3-((*R*)-1-phenylethyl)octahydro-2*H*-benzo[*e*][1,3]oxazin-4a-ol **10c****

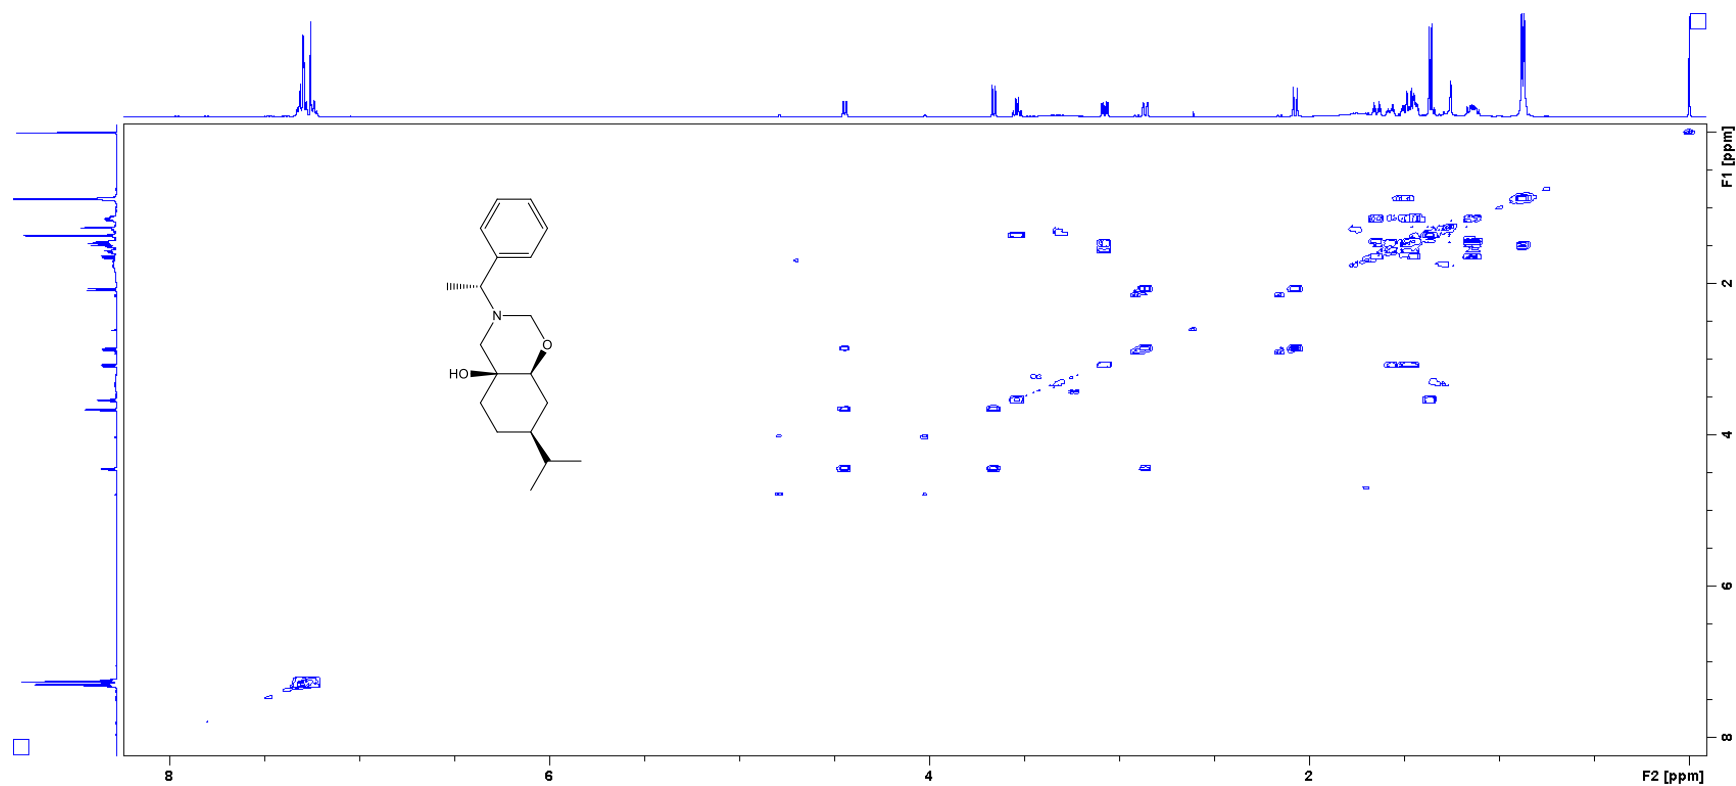

**Figure S 90: HSQC NMR of compound (4a*S*,7*S*,8a*S*)-7-Isopropyl-3-((*R*)-1-phenylethyl)octahydro-2*H*-benzo[*e*][1,3]oxazin-4a-ol **10c****

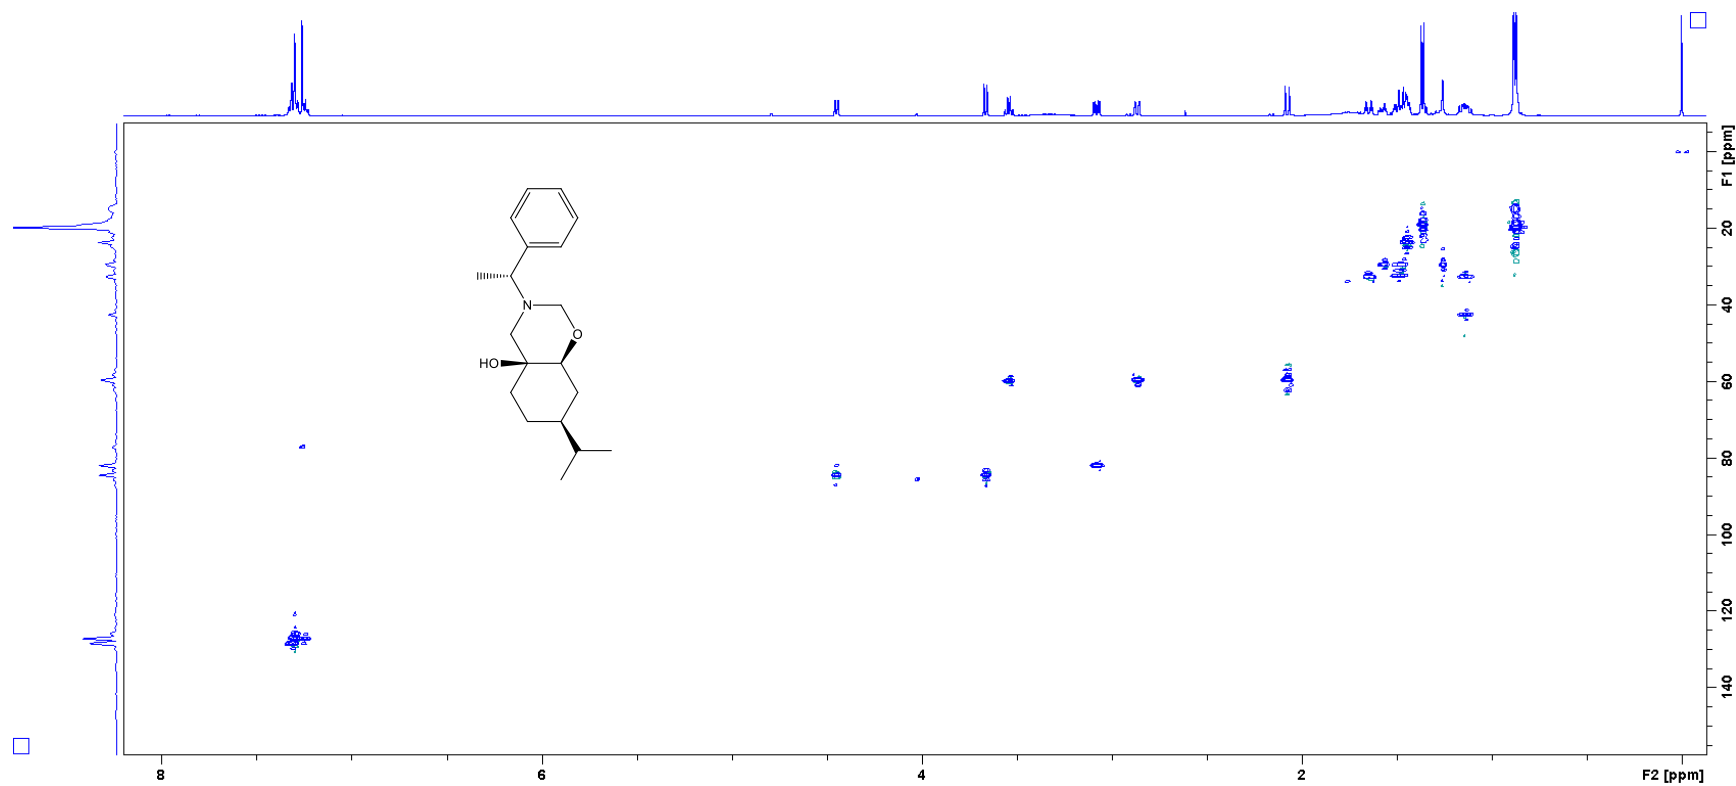

**Figure S 91: HMBC NMR of compound (4a*S*,7*S*,8a*S*)-7-Isopropyl-3-((*R*)-1-phenylethyl)octahydro-2*H*-benzo[*e*][1,3]oxazin-4a-ol **10c****

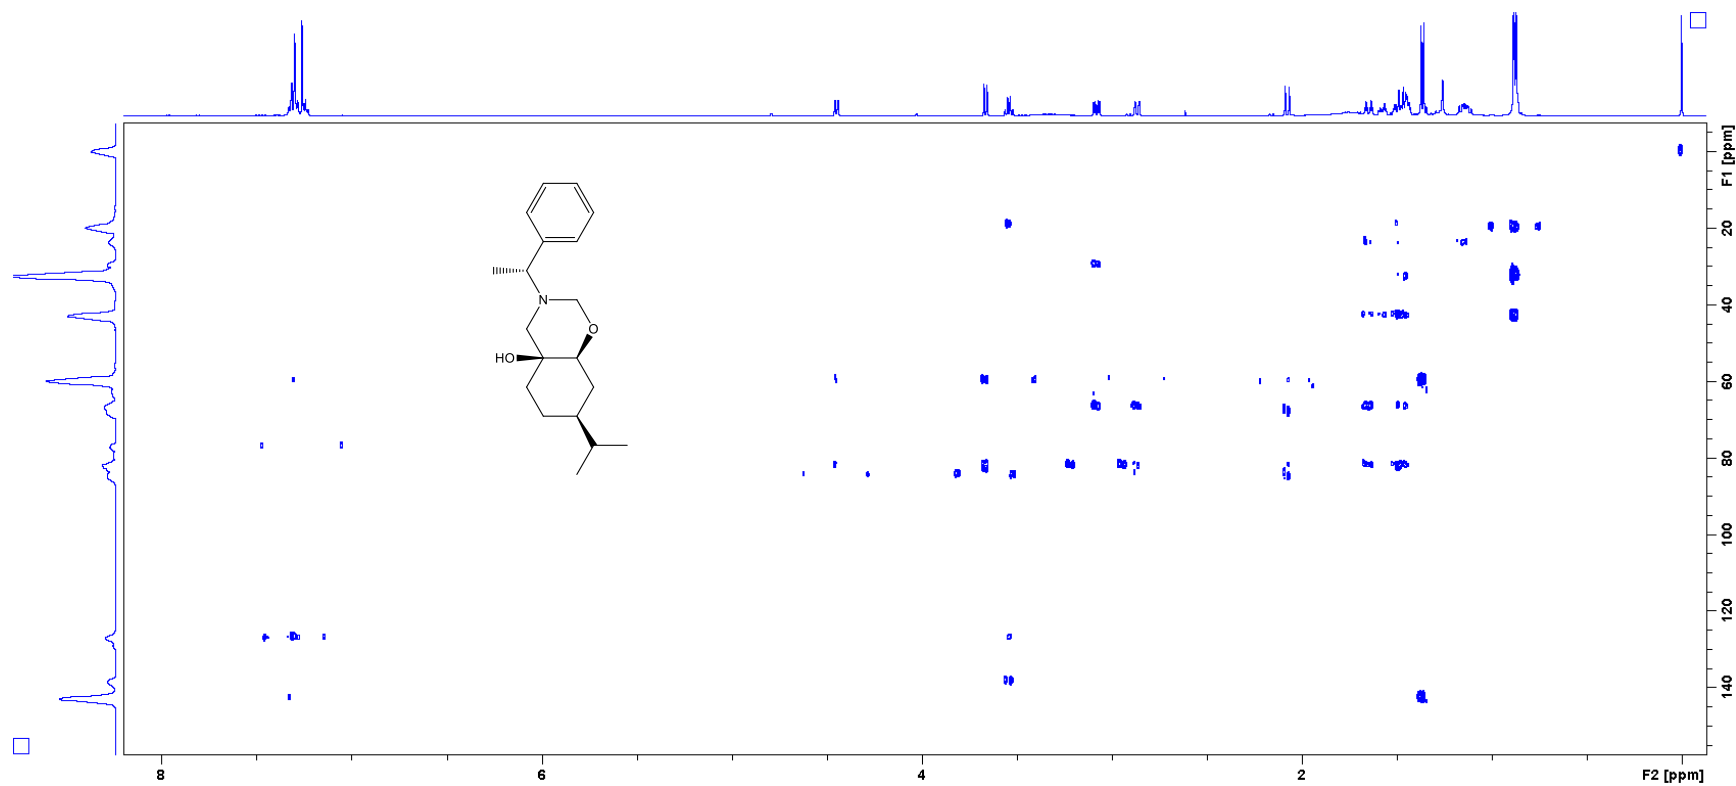



**Figure S 92:**  $^1\text{H}$ -NMR of compound 2,2,2-Trichloro- $N$ -((1*R*,5*S*)-5-isopropyl-2-methylenecyclohexyl)acetamide (intermediate) **16a** and 2,2,2-trichloro- $N$ -((1*S*,5*S*)-5-isopropyl-2-methylenecyclohexyl)acetamide **16b**

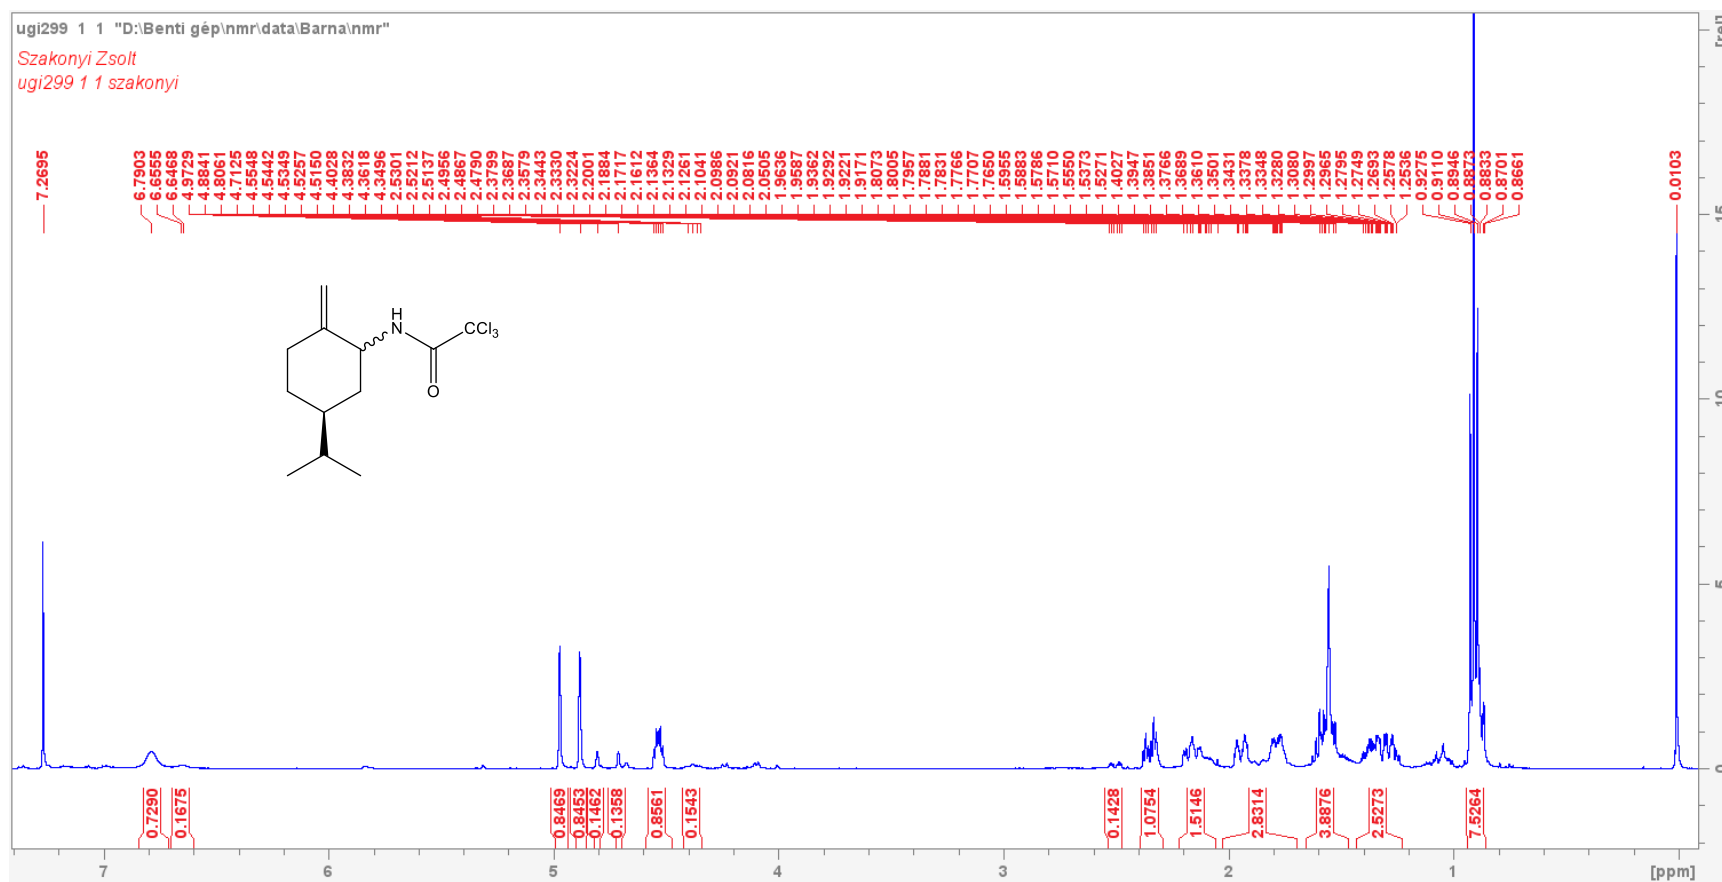

**Figure S 93:**  $^{13}\text{C}$ -NMR of compound 2,2,2-Trichloro-*N*-((1*R*,5*S*)-5-isopropyl-2-methylenecyclohexyl)acetamide (intermediate) **16a** and 2,2,2-trichloro-*N*-((1*S*,5*S*)-5-isopropyl-2-methylenecyclohexyl)acetamide **16b**

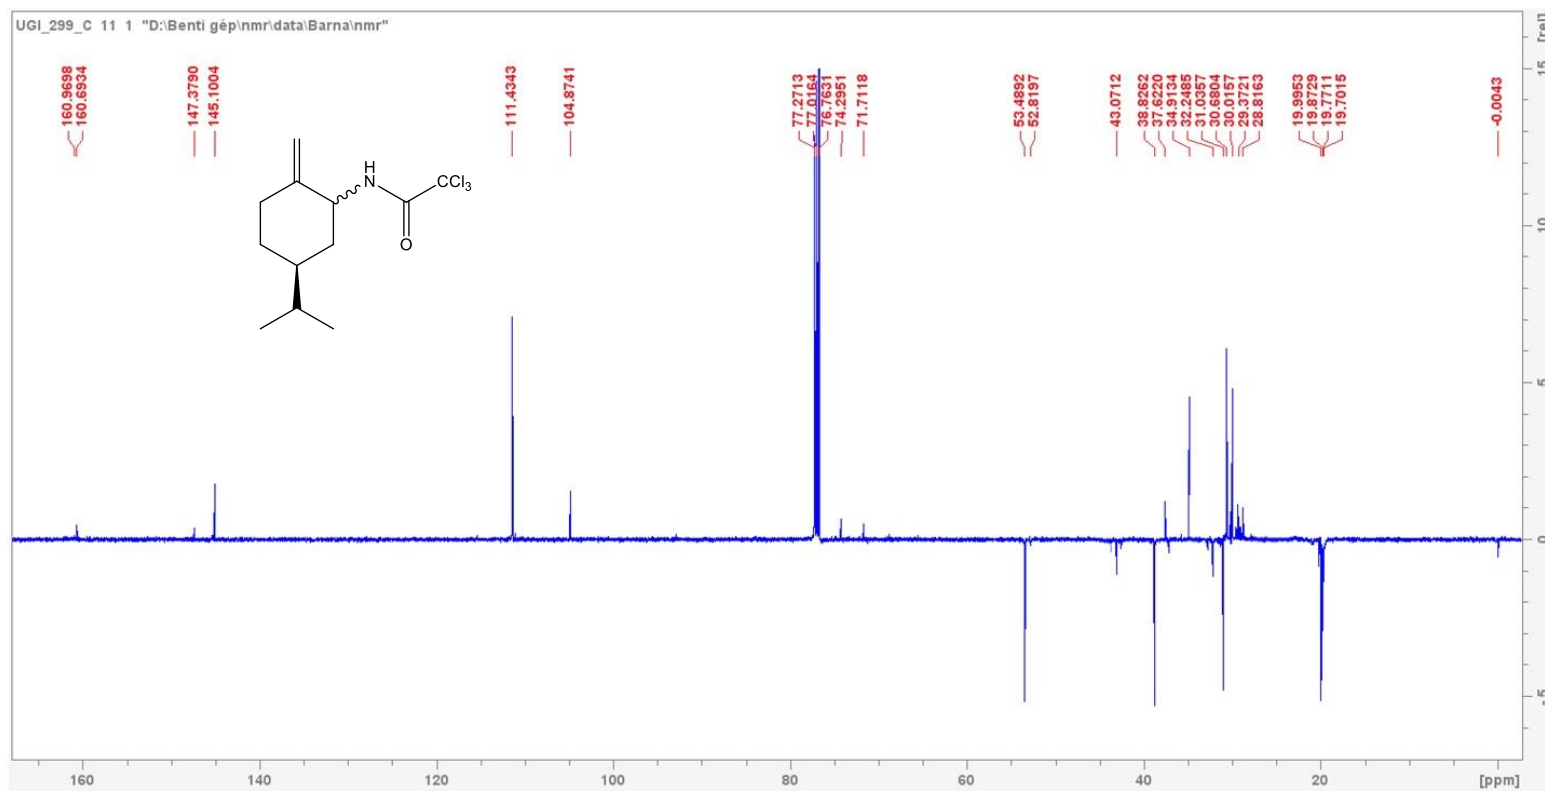

**Figure S 94:**  $^1\text{H}$ -NMR of compound *tert*-Butyl ((1*R*,5*S*)-5-isopropyl-2-methylenecyclohexyl)carbamate **18a** and *tert*-butyl ((1*S*,5*S*)-5-isopropyl-2-methylenecyclohexyl)carbamate **18b**

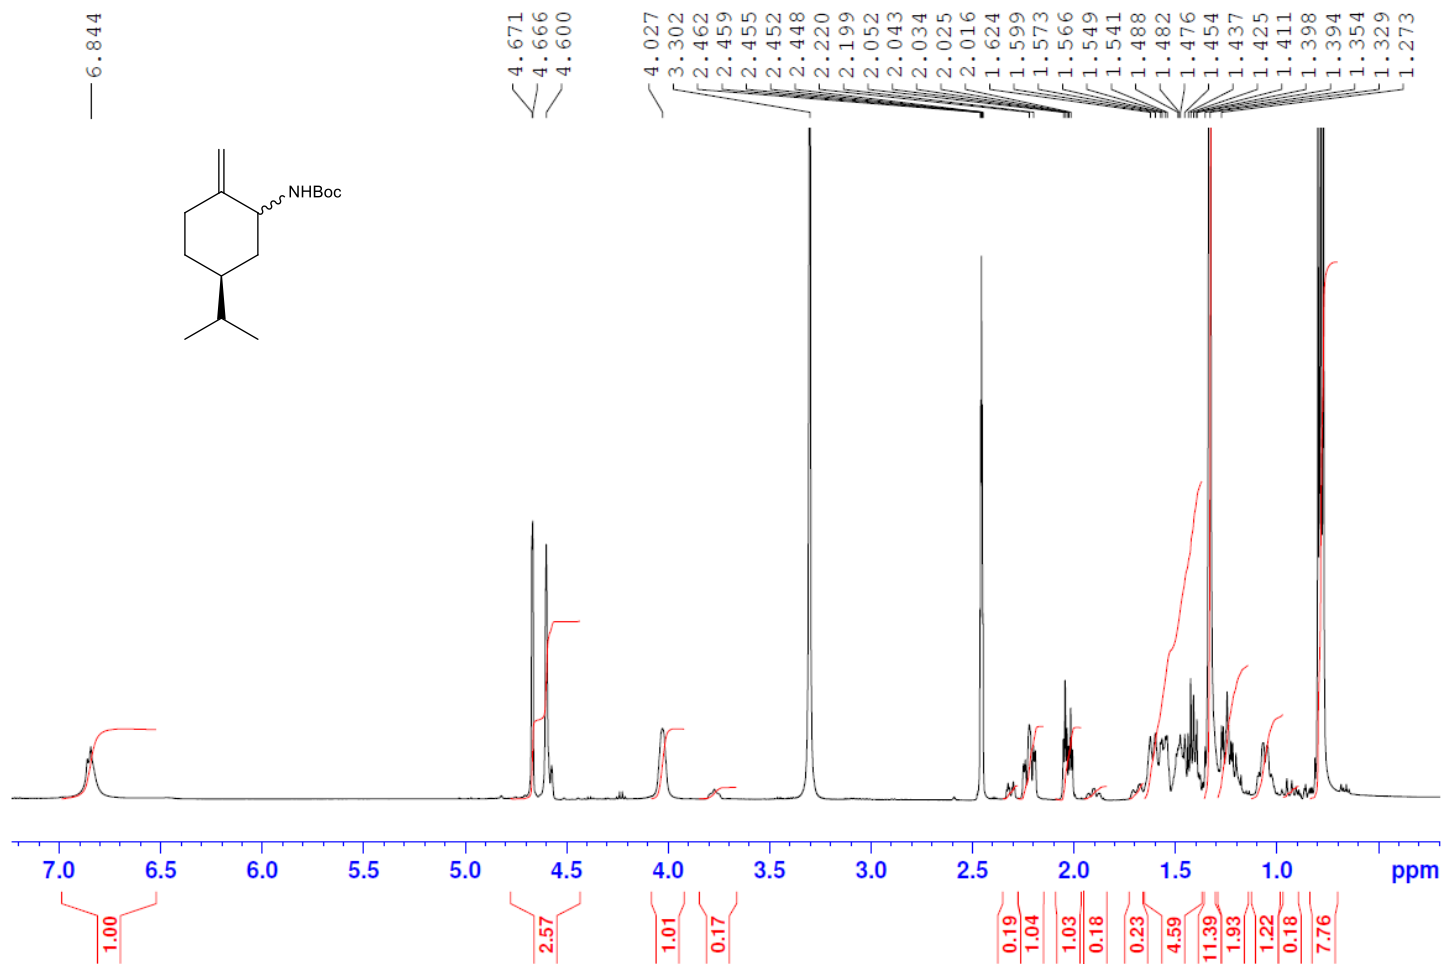

**Figure S 95:**  $^{13}\text{C}$ -NMR of compound *tert*-Butyl ((1*R*,5*S*)-5-isopropyl-2-methylenecyclohexyl)carbamate **18a** and *tert*-butyl ((1*S*,5*S*)-5-isopropyl-2-methylenecyclohexyl)carbamate **18b**

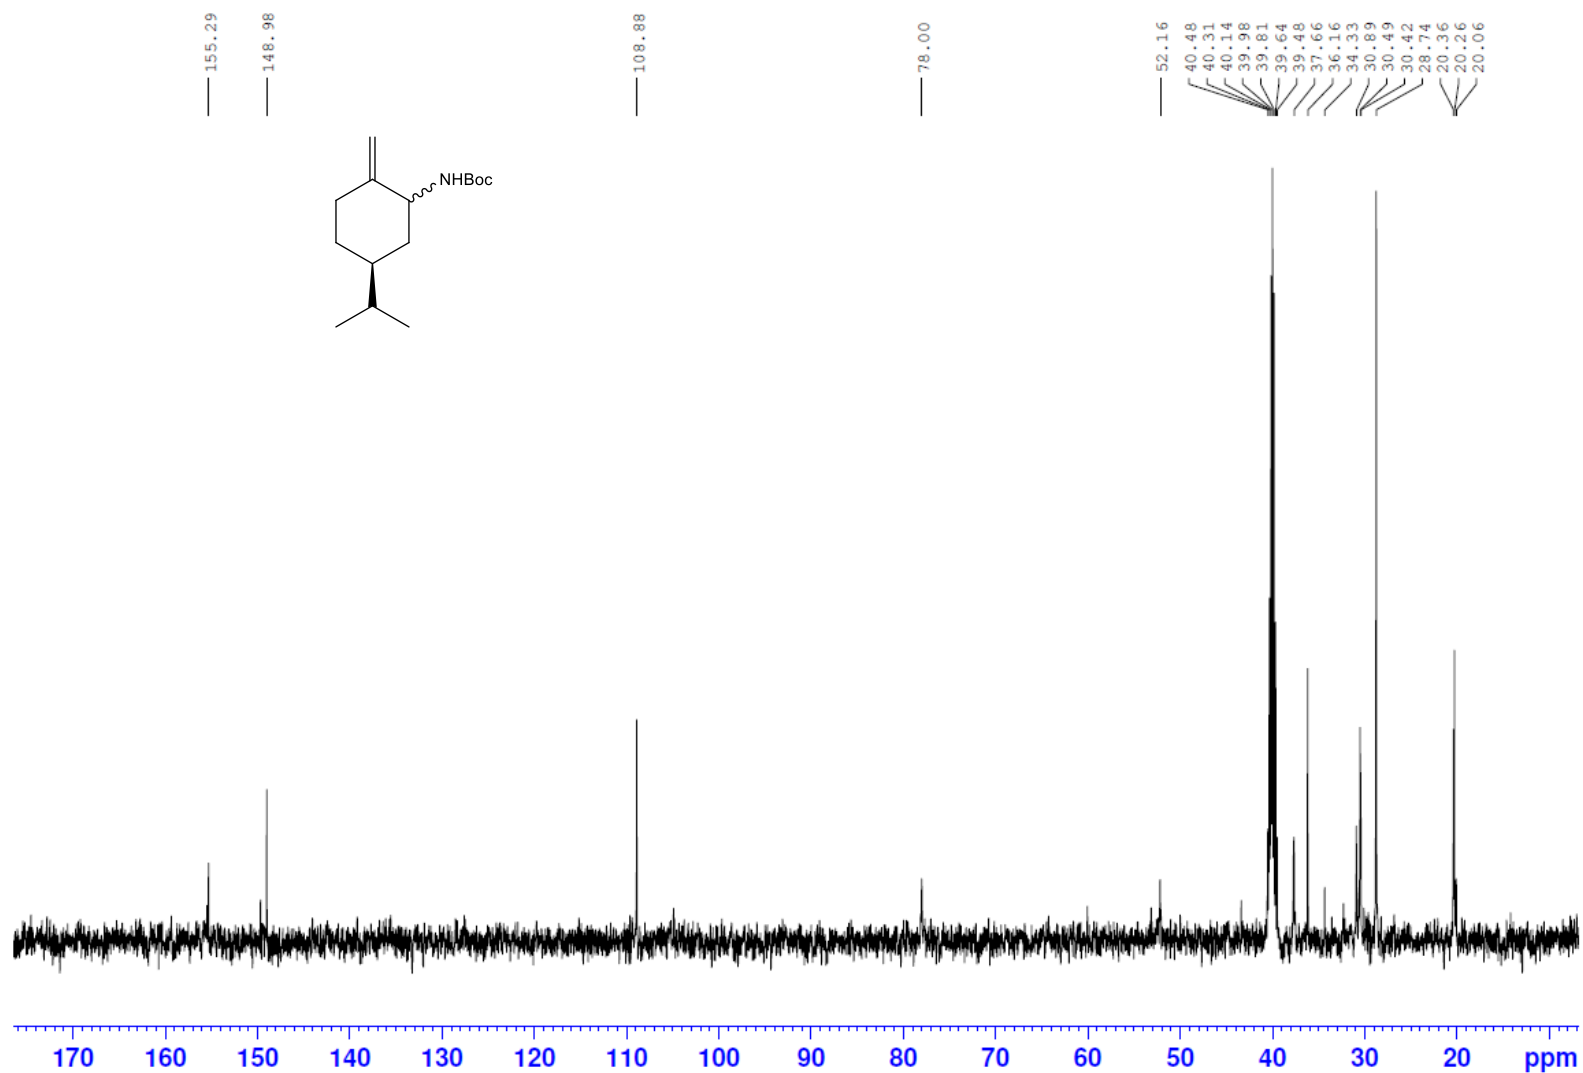

**Figure S 96: NOESY-NMR of compound** *tert*-Butyl ((1*R*,5*S*)-5-isopropyl-2-methylenecyclohexyl)carbamate **18a** and *tert*-butyl ((1*S*,5*S*)-5-isopropyl-2-methylenecyclohexyl)carbamate **18b**

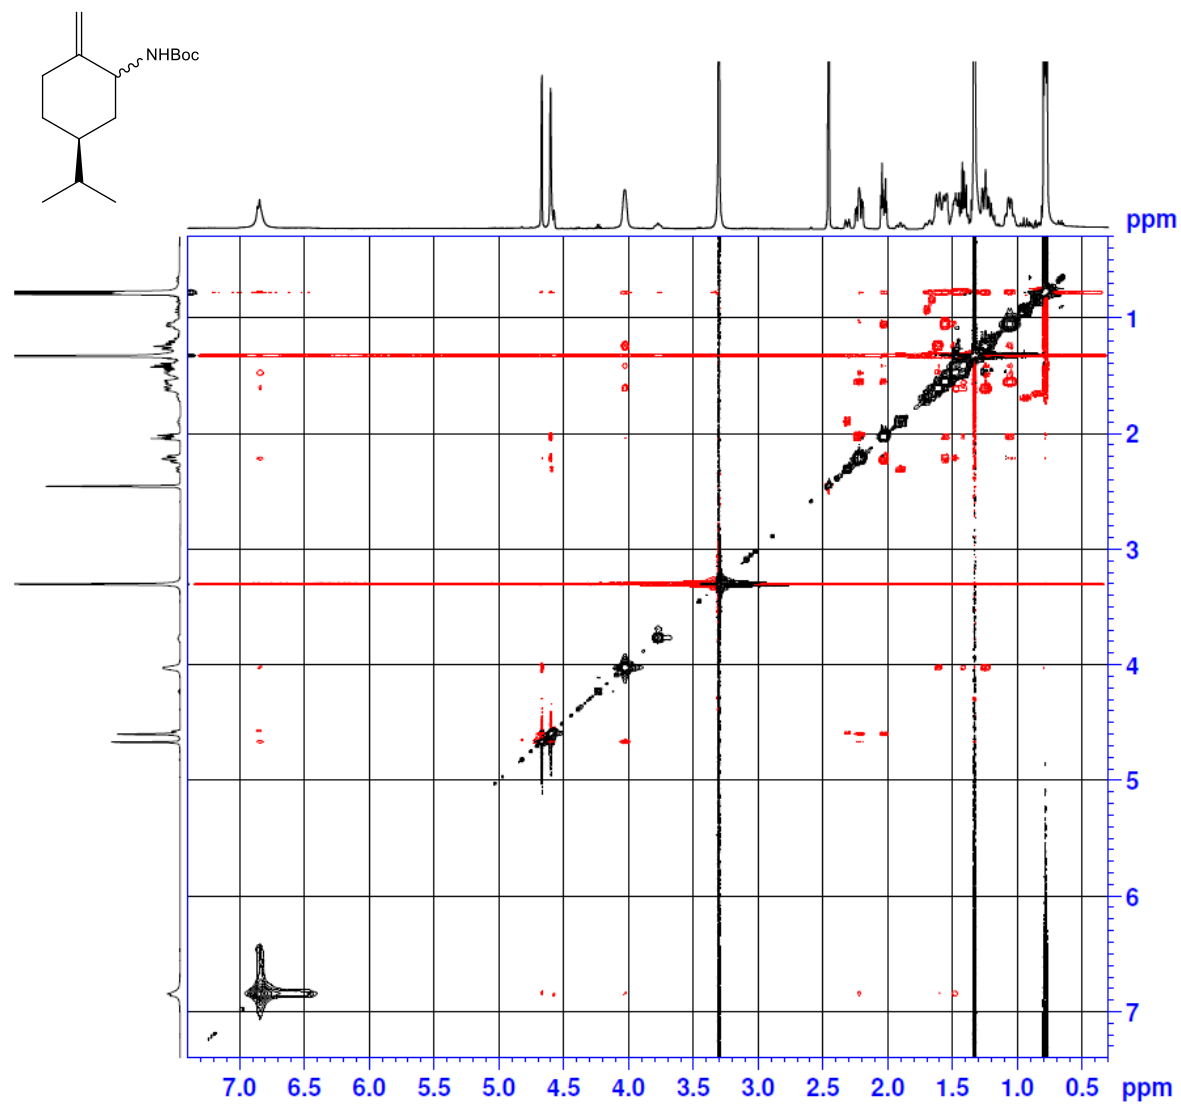

**Figure S 96:**  $^1\text{H}$ -NMR of compound *tert*-Butyl ((1*R*,2*S*,5*S*)-2-hydroxy-2-hydroxymethyl-5-isopropylcyclohexyl)-carbamate **19a**

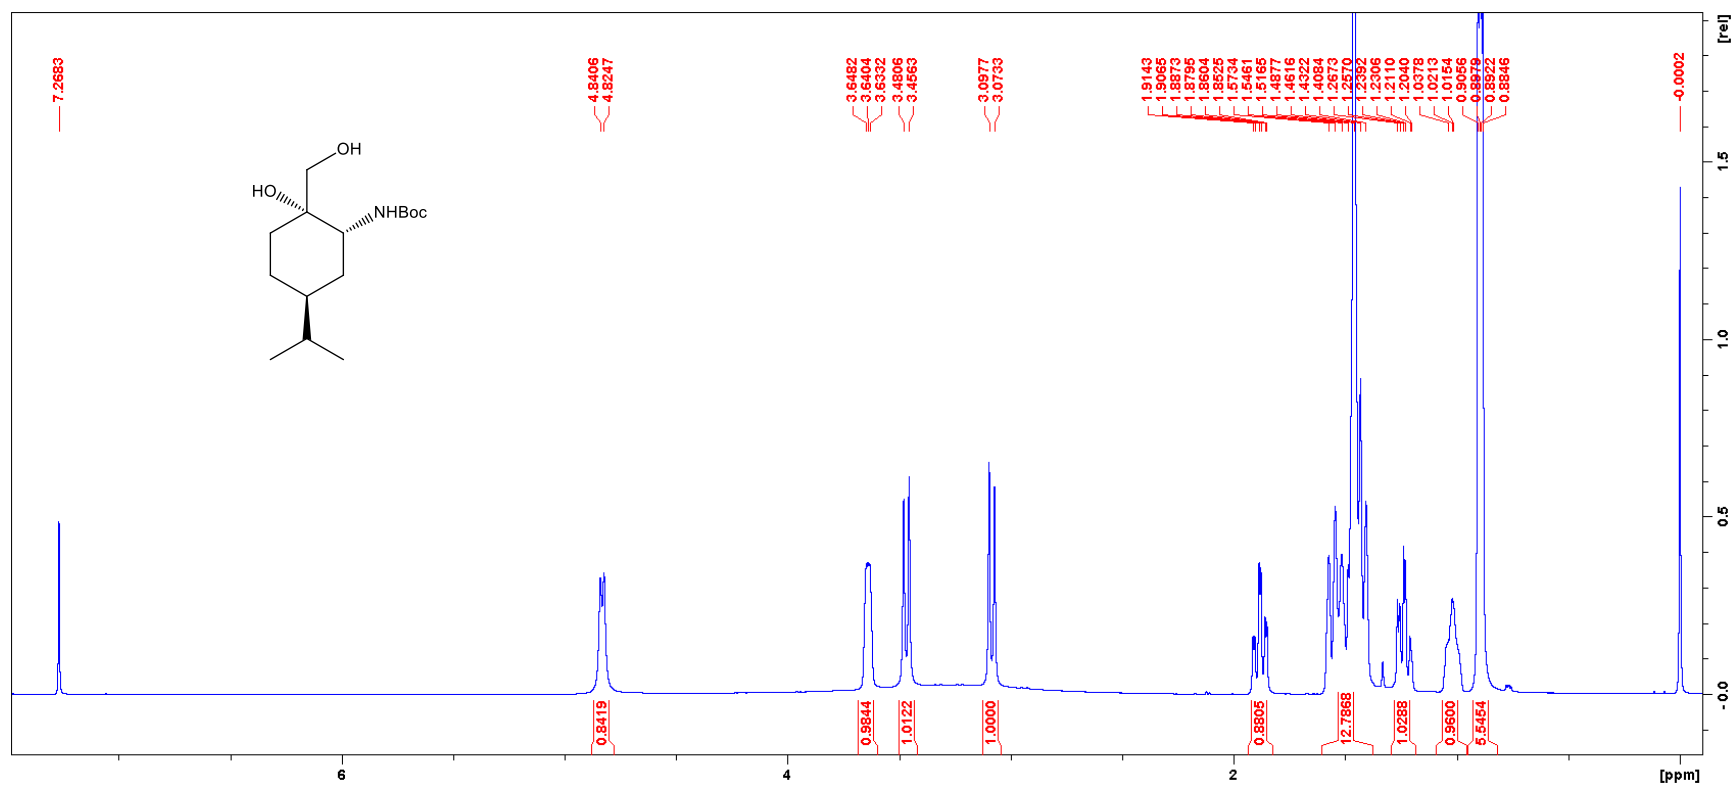

**Figure S 97:**  $^{13}\text{C}$ -NMR of compound *tert*-Butyl ((1*R*,2*S*,5*S*)-2-hydroxy-2-hydroxymethyl-5-isopropylcyclohexyl)-carbamate **19a**

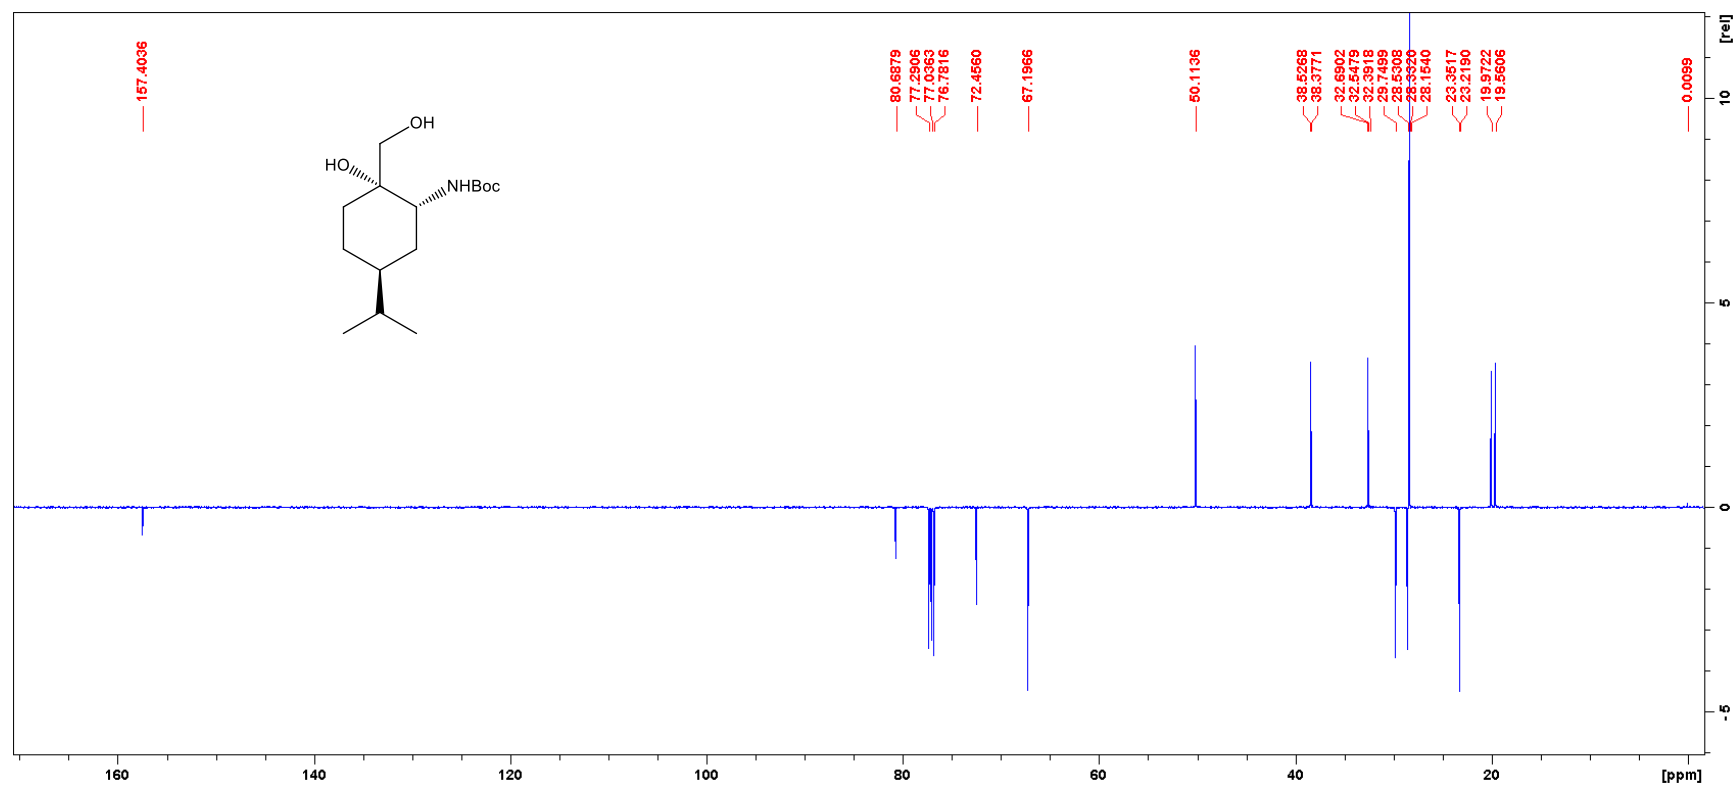

**Figure S 98: HSQC NMR of compound** *tert*-Butyl ((1*R*,2*S*,5*S*)-2-hydroxy-2-hydroxymethyl-5-isopropylcyclohexyl)-carbamate **19a**

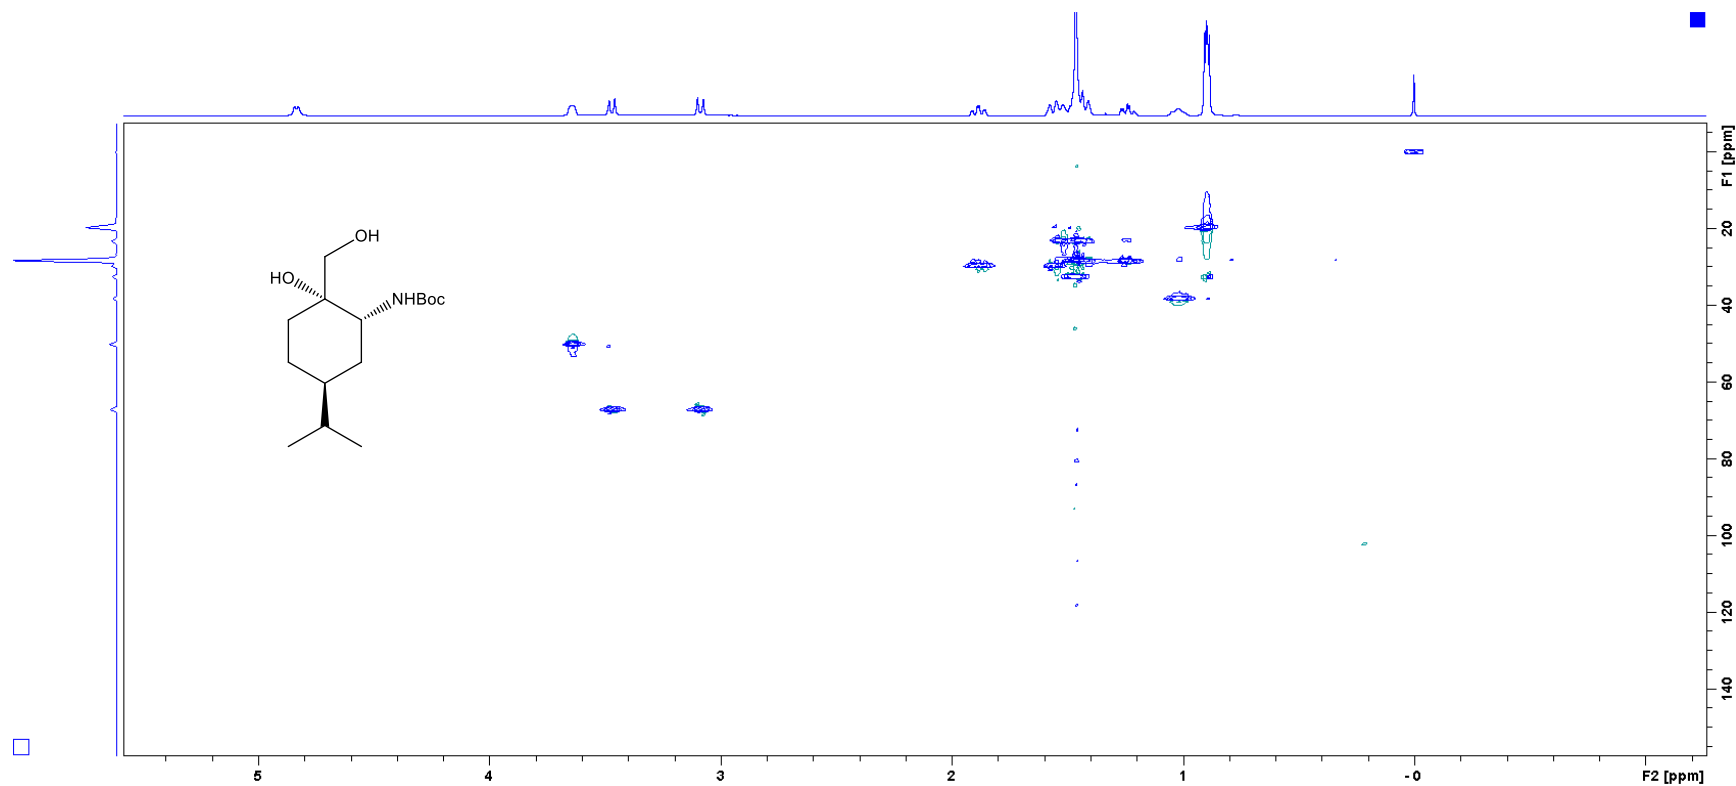



**Figure S 99: HMBC NMR of compound *tert*-Butyl ((1*R*,2*S*,5*S*)-2-hydroxy-2-hydroxymethyl-5-isopropylcyclohexyl)-carbamate **19a****

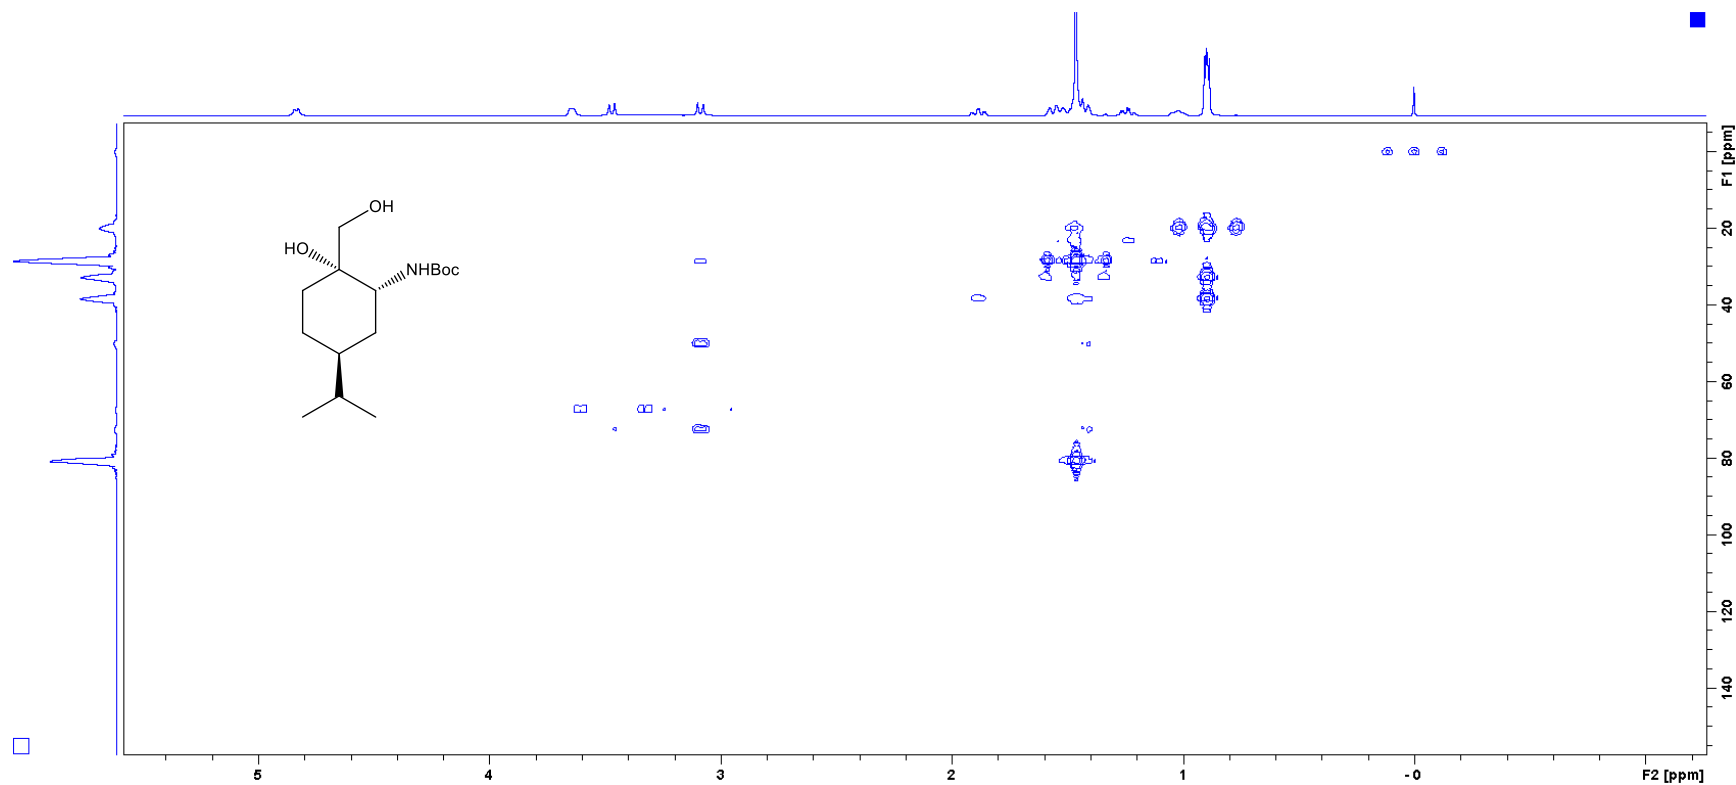

**Figure S 100:**  $^1\text{H}$ -NMR of compound (1*R*,2*R*,5*S*)- and (1*S*,2*R*,5*S*)-*tert*-Butyl 2-hydroxy-2-hydroxymethyl-5-isopropylcyclohexyl)carbamate mixture **19b- c**

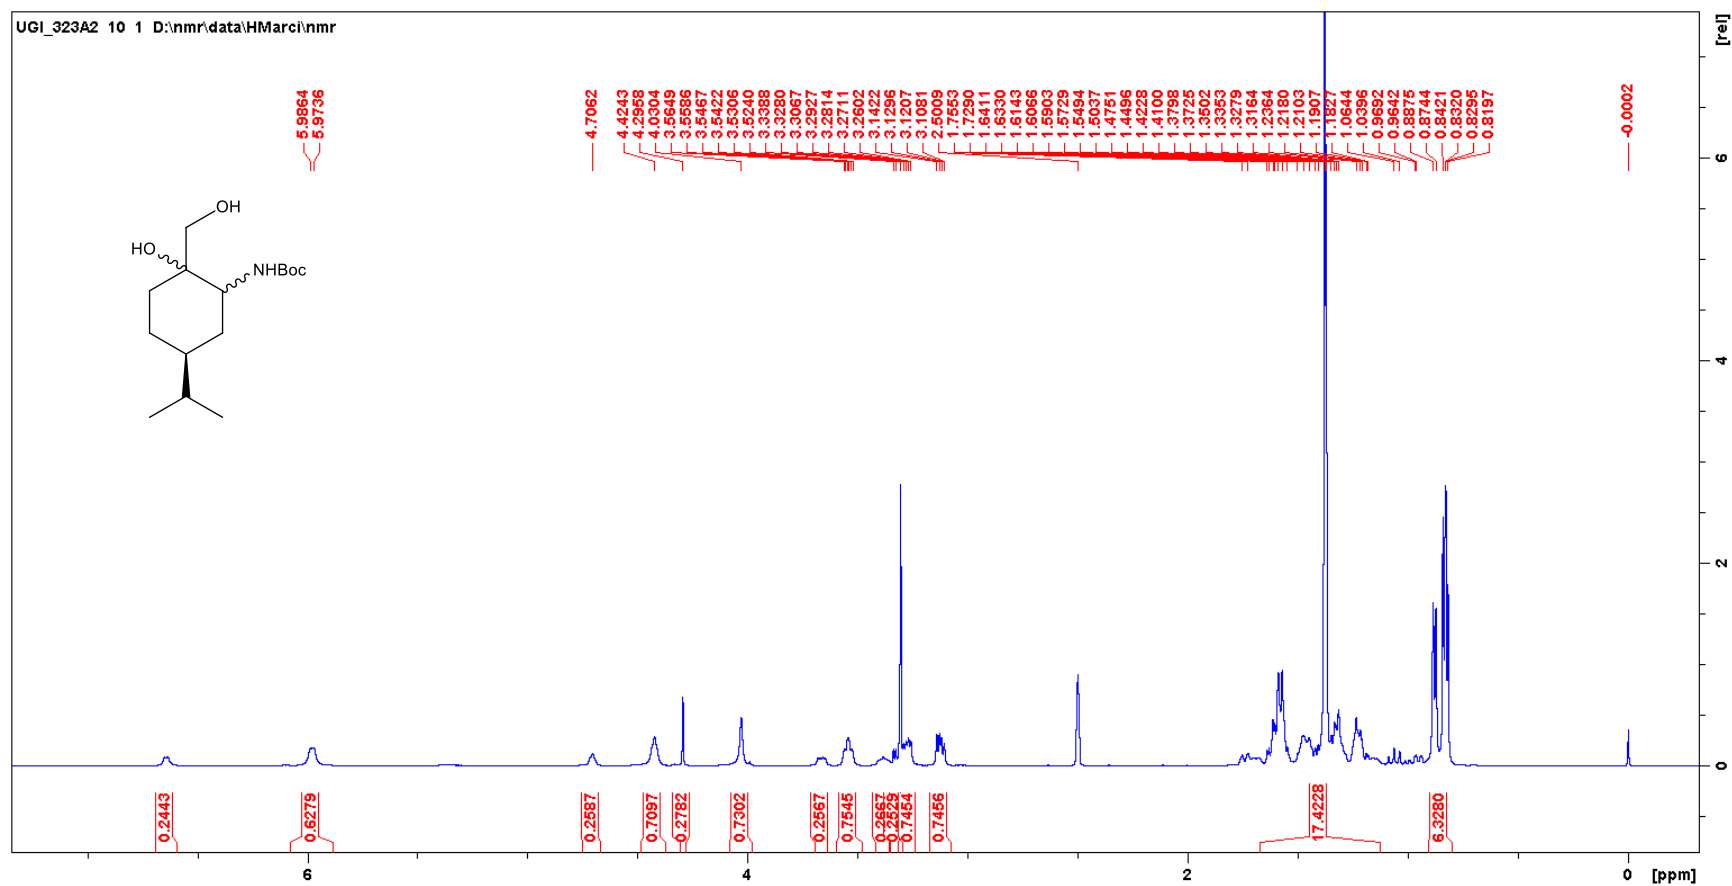

**Figure S 101:**  $^{13}\text{C}$ -NMR of compound (1*R*,2*R*,5*S*)- and (1*S*,2*R*,5*S*)-*tert*-Butyl 2-hydroxy-2-hydroxymethyl-5-isopropylcyclohexyl)carbamate mixture **19b- c**

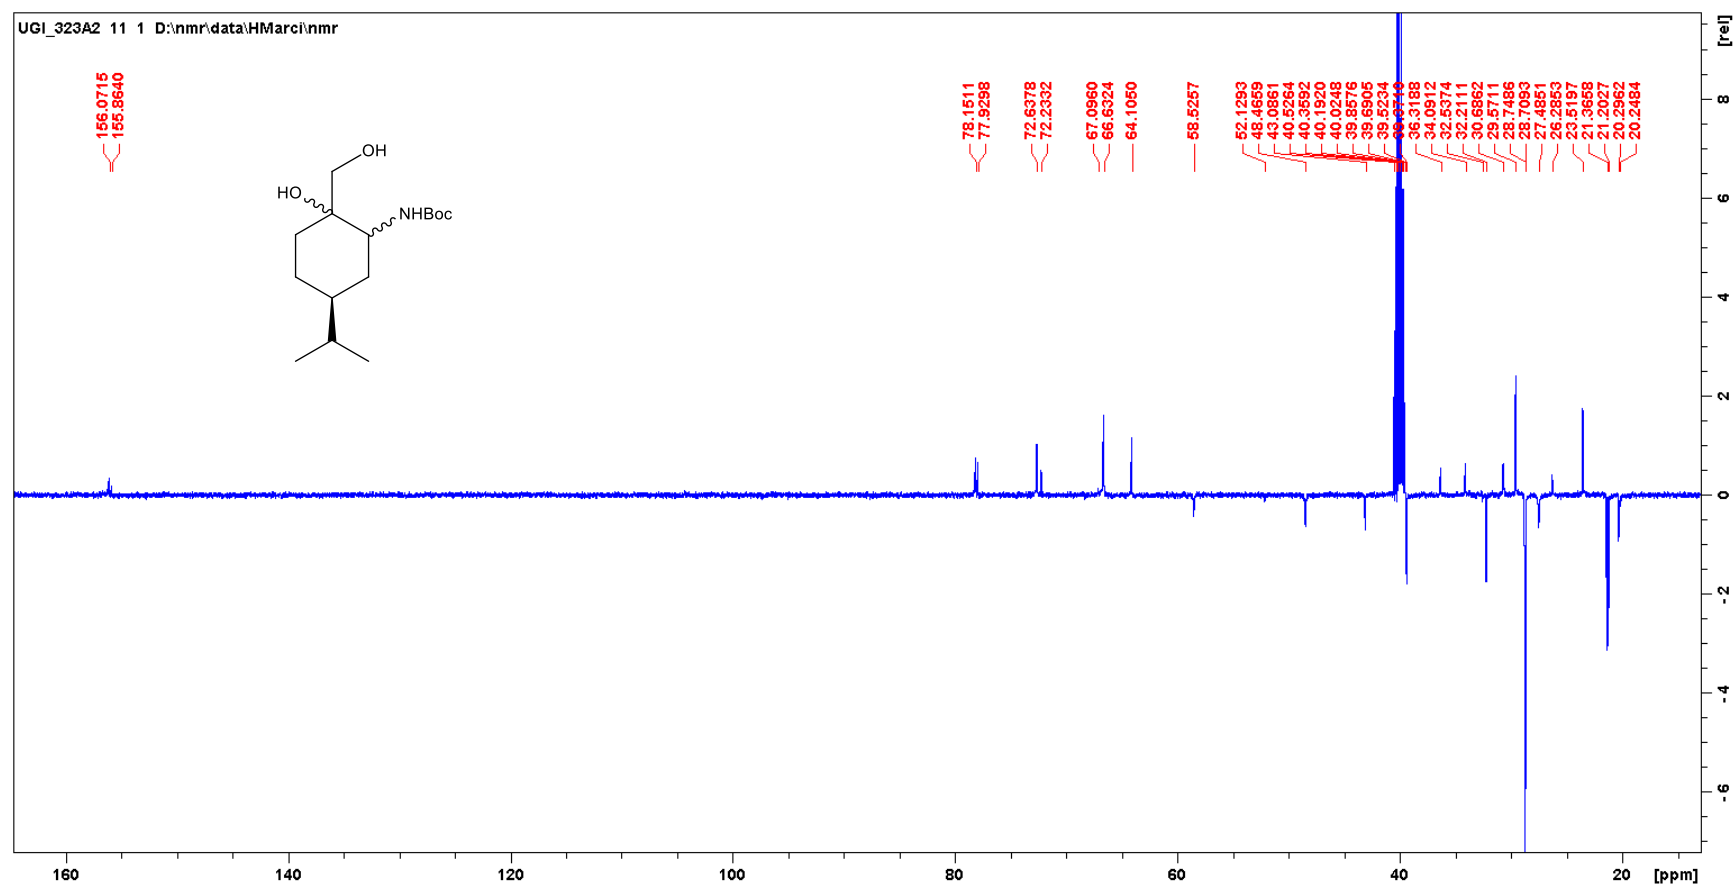

**Figure S 102: COSY-NMR of compound (1*R*,2*R*,5*S*)- and (1*S*,2*R*,5*S*)-*tert*-Butyl 2-hydroxy-2-hydroxymethyl-5-isopropylcyclohexyl)carbamate mixture **19b- c****

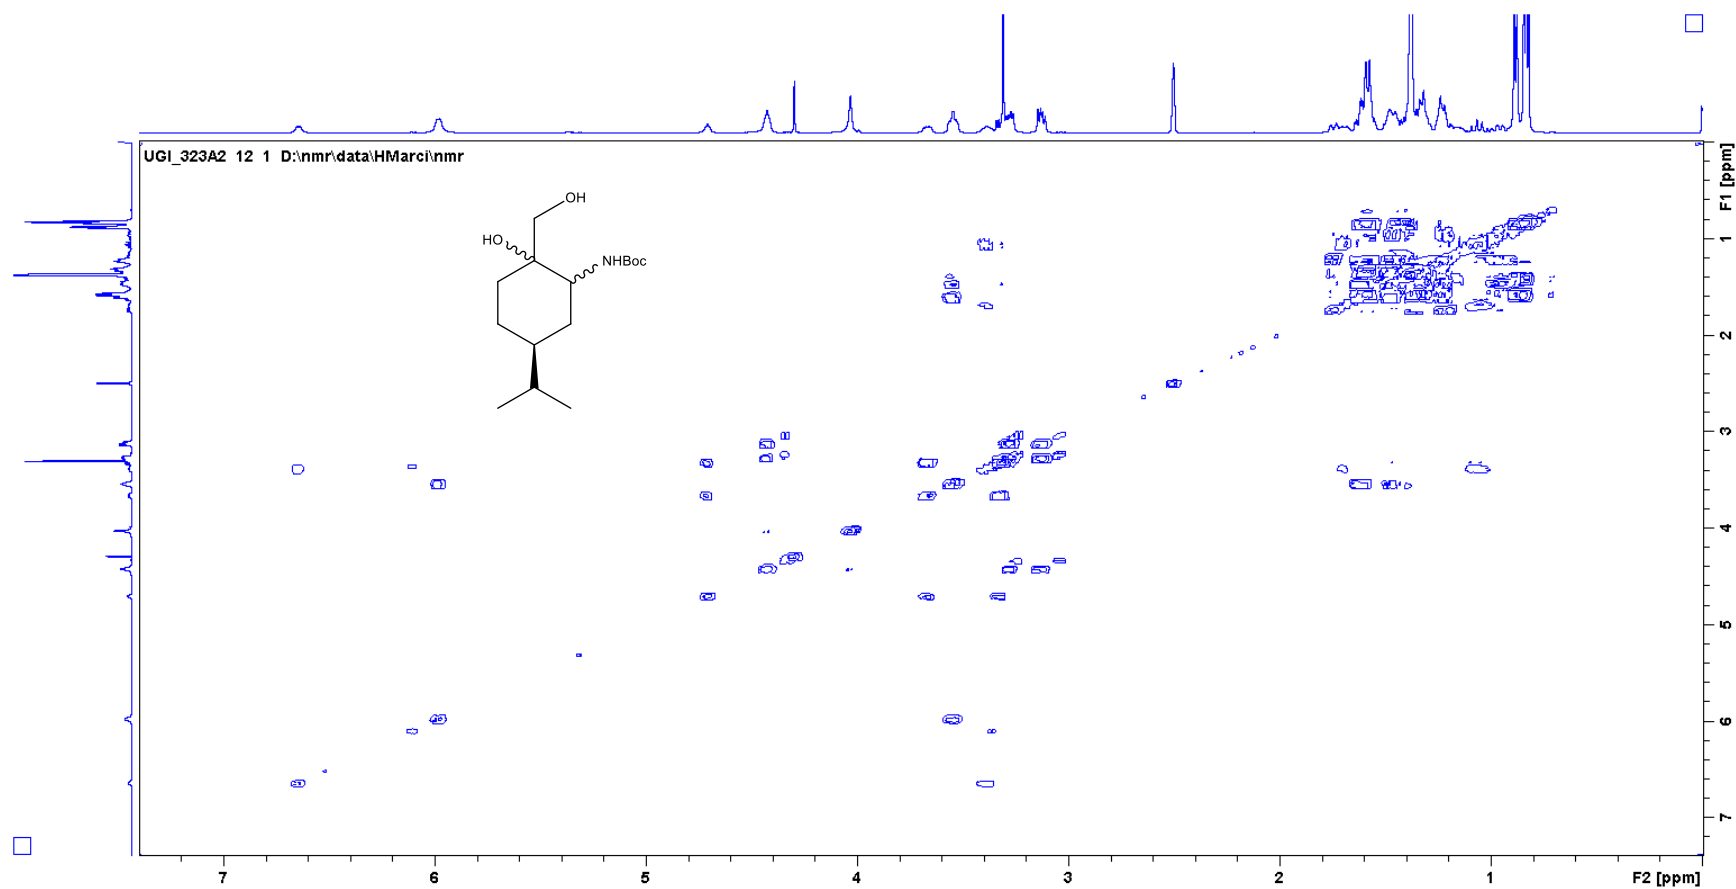

**Figure S 103:  $^1\text{H}$ -NMR of compound *tert*-Butyl ((5*R*,6*R*,8*S*)-8-isopropyl-2,2-dimethyl-1,3-dioxaspiro[4,5]decane-6-yl)carbamate **20b****

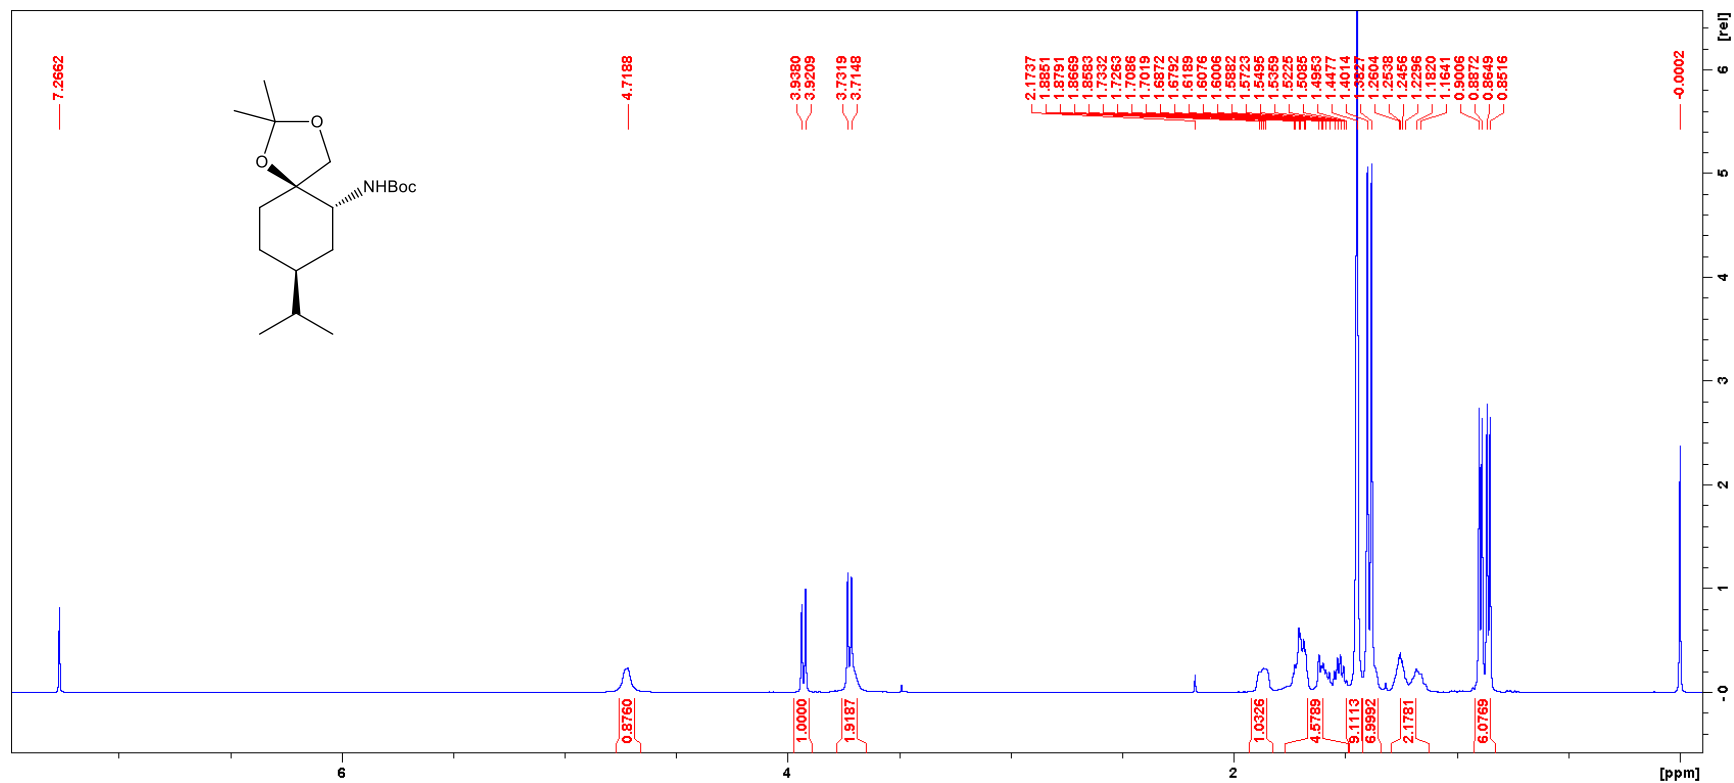

**Figure S 104:**  $^{13}\text{C}$ -NMR of compound *tert*-Butyl ((5*R*,6*R*,8*S*)-8-isopropyl-2,2-dimethyl-1,3-dioxaspiro[4,5]decane-6-yl)carbamate **20b**

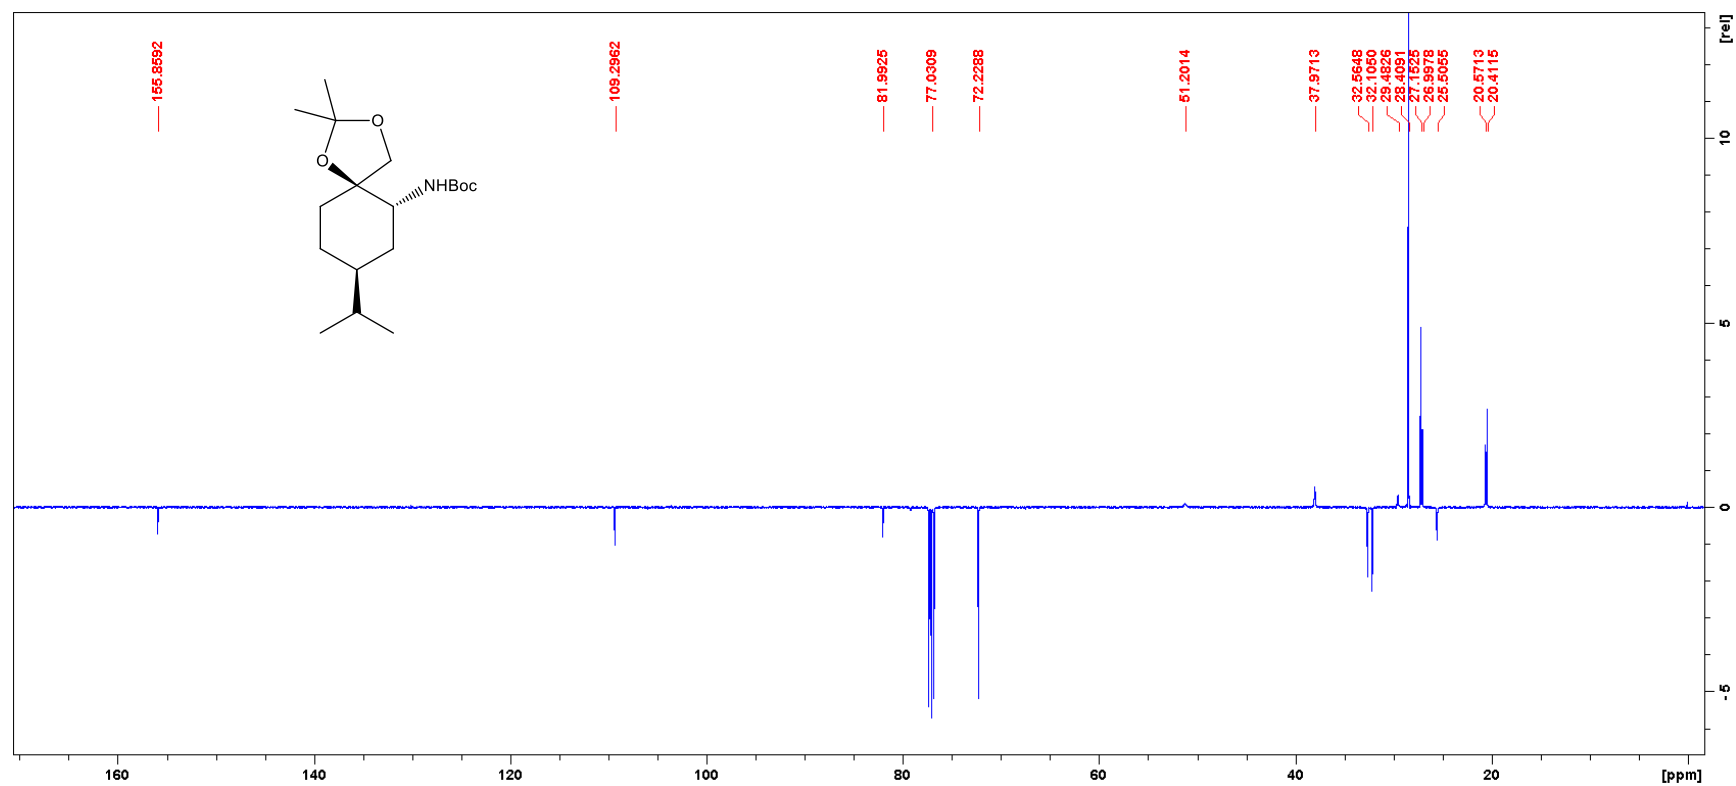

**Figure S 105: HSQC NMR of *tert*-Butyl ((5*R*,6*R*,8*S*)-8-isopropyl-2,2-dimethyl-1,3-dioxaspiro[4,5]decane-6-yl)carbamate **20b****

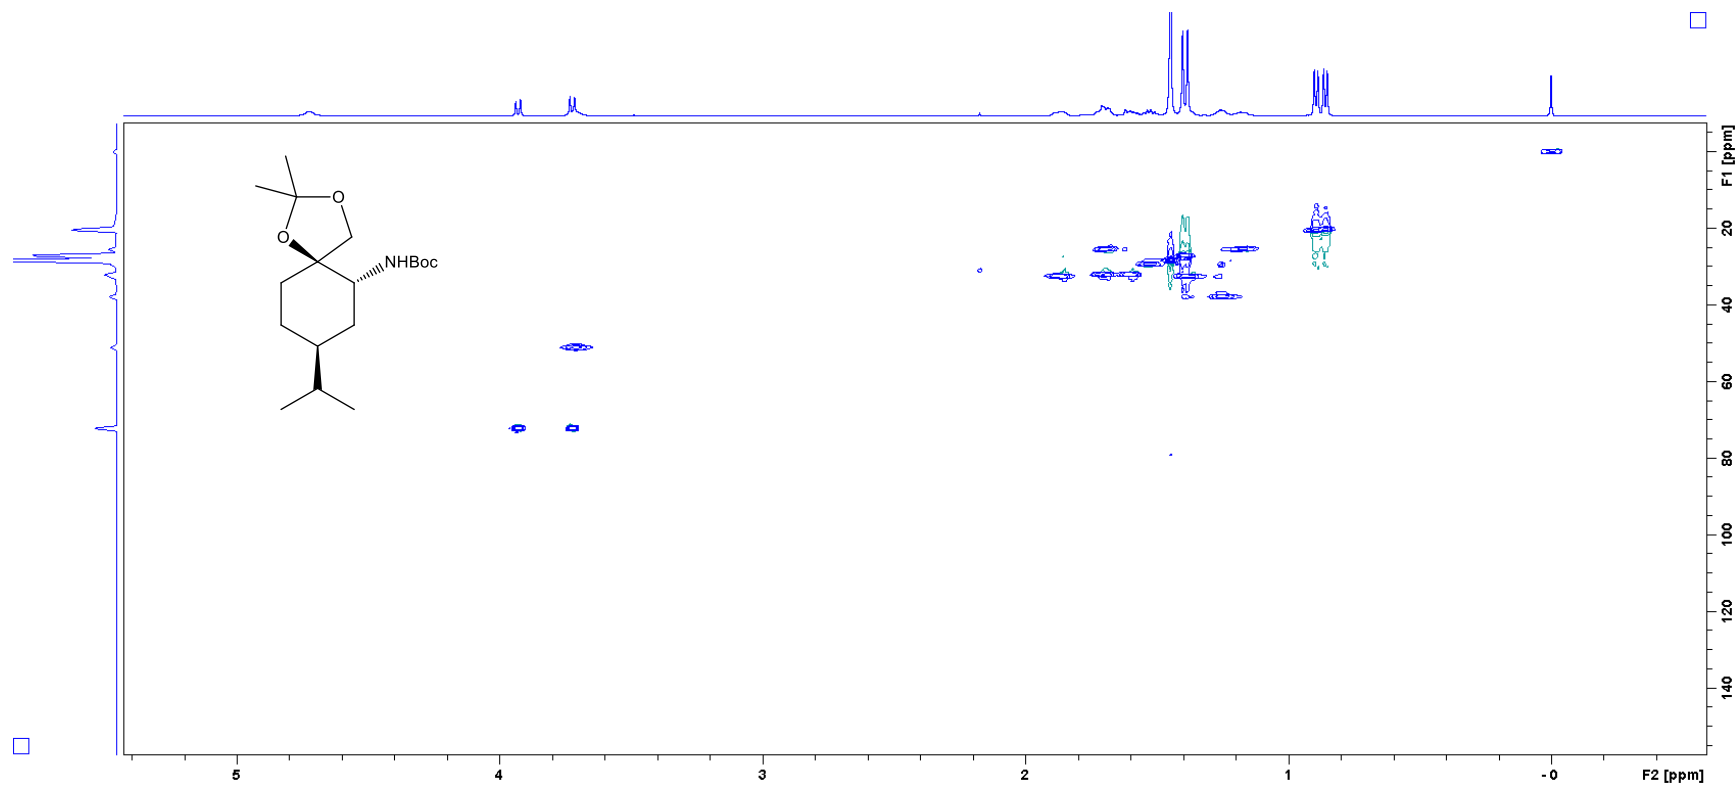

**Figure S 106: HMBC NMR of compound *tert*-Butyl ((5*R*,6*R*,8*S*)-8-isopropyl-2,2-dimethyl-1,3-dioxaspiro[4,5]decane-6-yl)carbamate **20b****

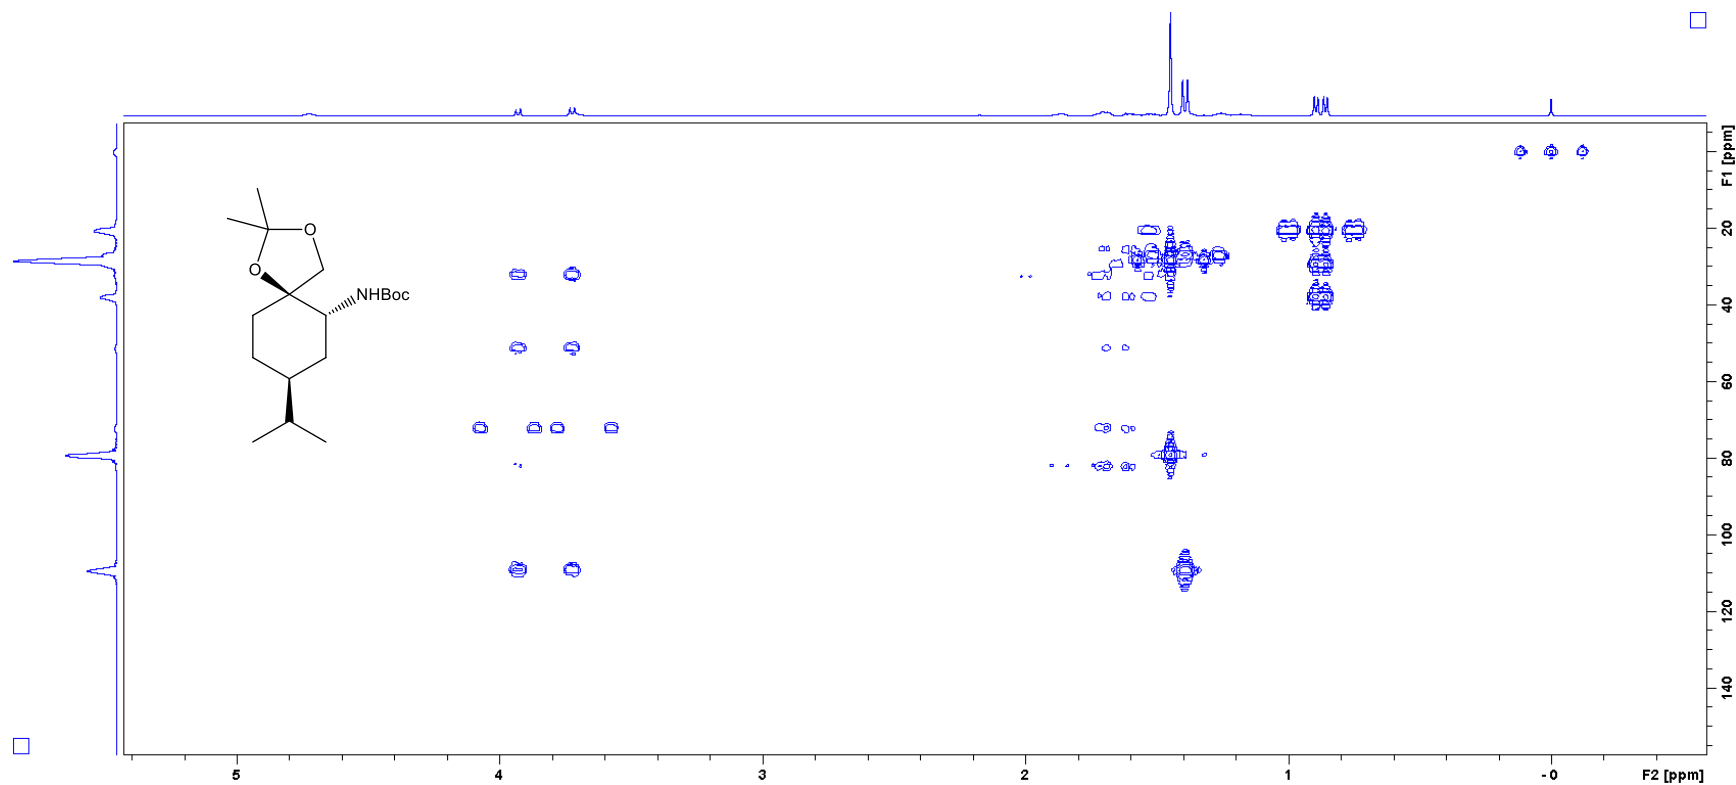



**Figure S 107:  $^1\text{H}$ -NMR of compound *tert*-Butyl ((5*R*,6*S*,8*S*)-8-isopropyl-2,2-dimethyl-1,3-dioxaspiro[4,5]decane-6-yl)carbamate **20c****

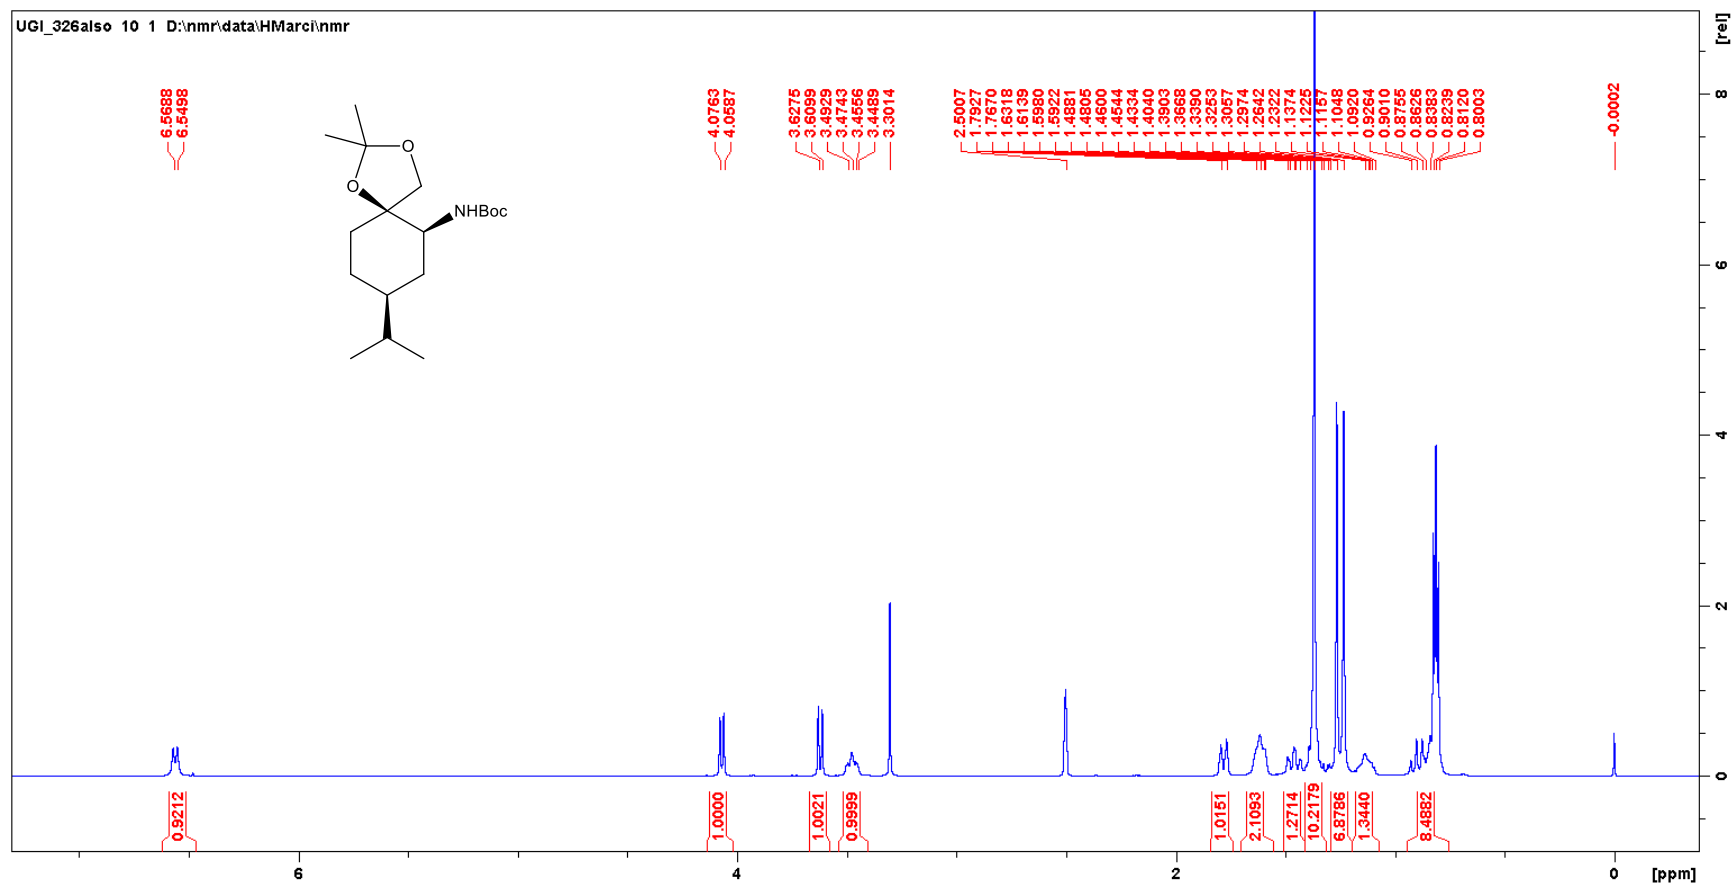

**Figure S 108:**  $^{13}\text{C}$ -NMR of compound *tert*-Butyl ((5*R*,6*S*,8*S*)-8-isopropyl-2,2-dimethyl-1,3-dioxaspiro[4,5]decane-6-yl)carbamate **20c**

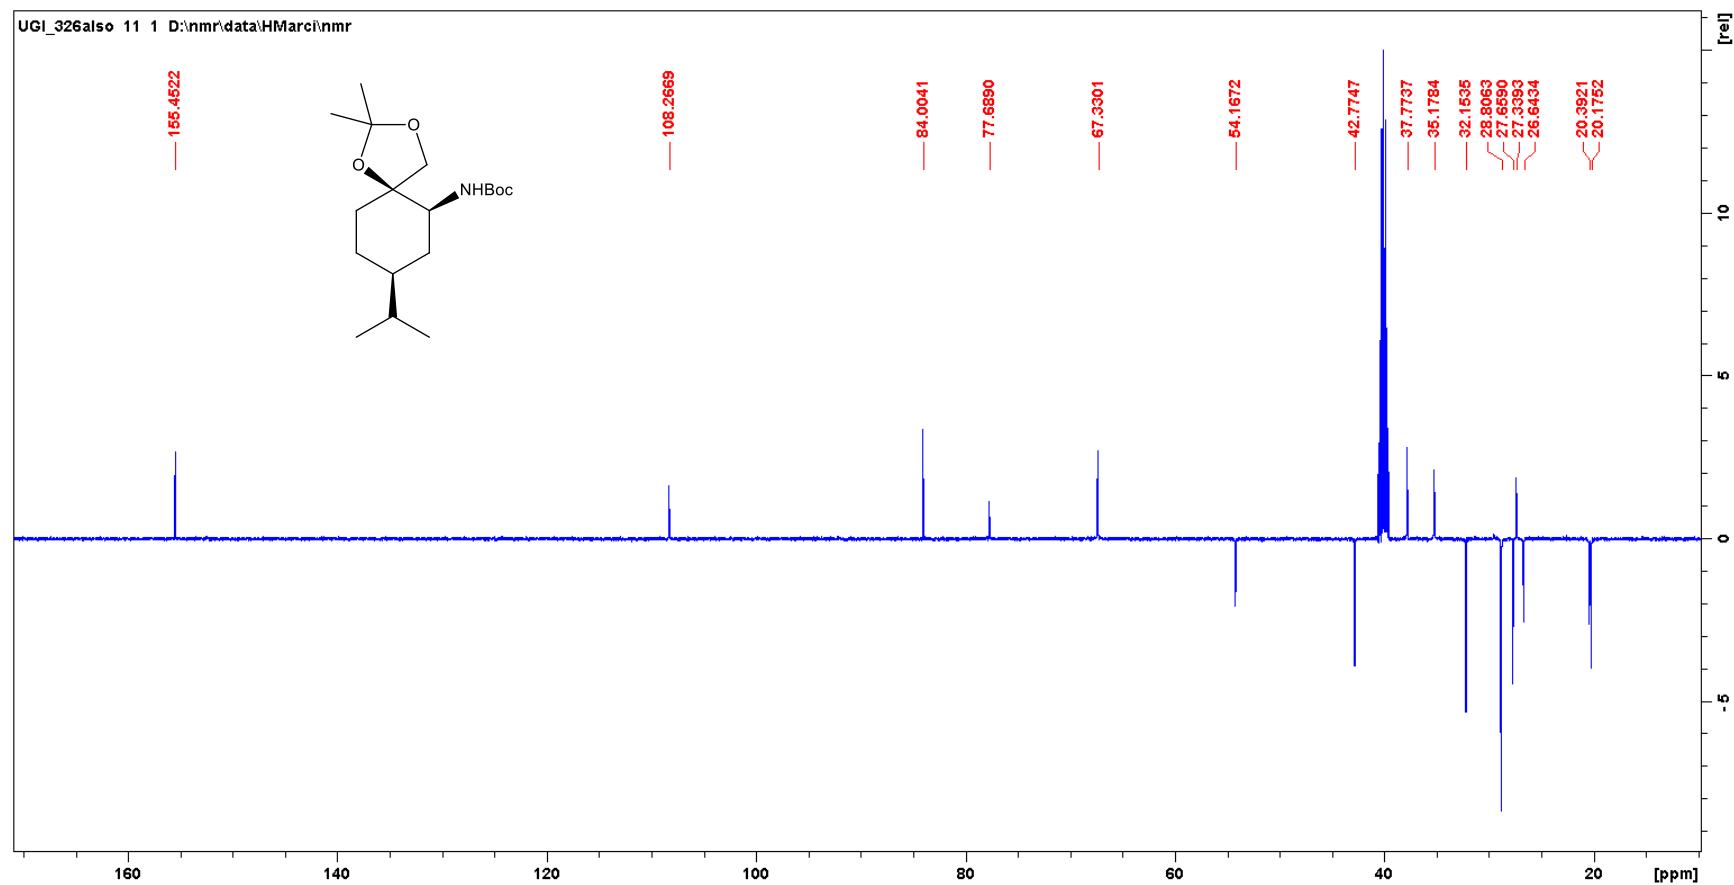

**Figure S 109: COSY NMR of compound *tert*-Butyl ((5*R*,6*S*,8*S*)-8-isopropyl-2,2-dimethyl-1,3-dioxaspiro[4,5]decane-6-yl)carbamate **20c****

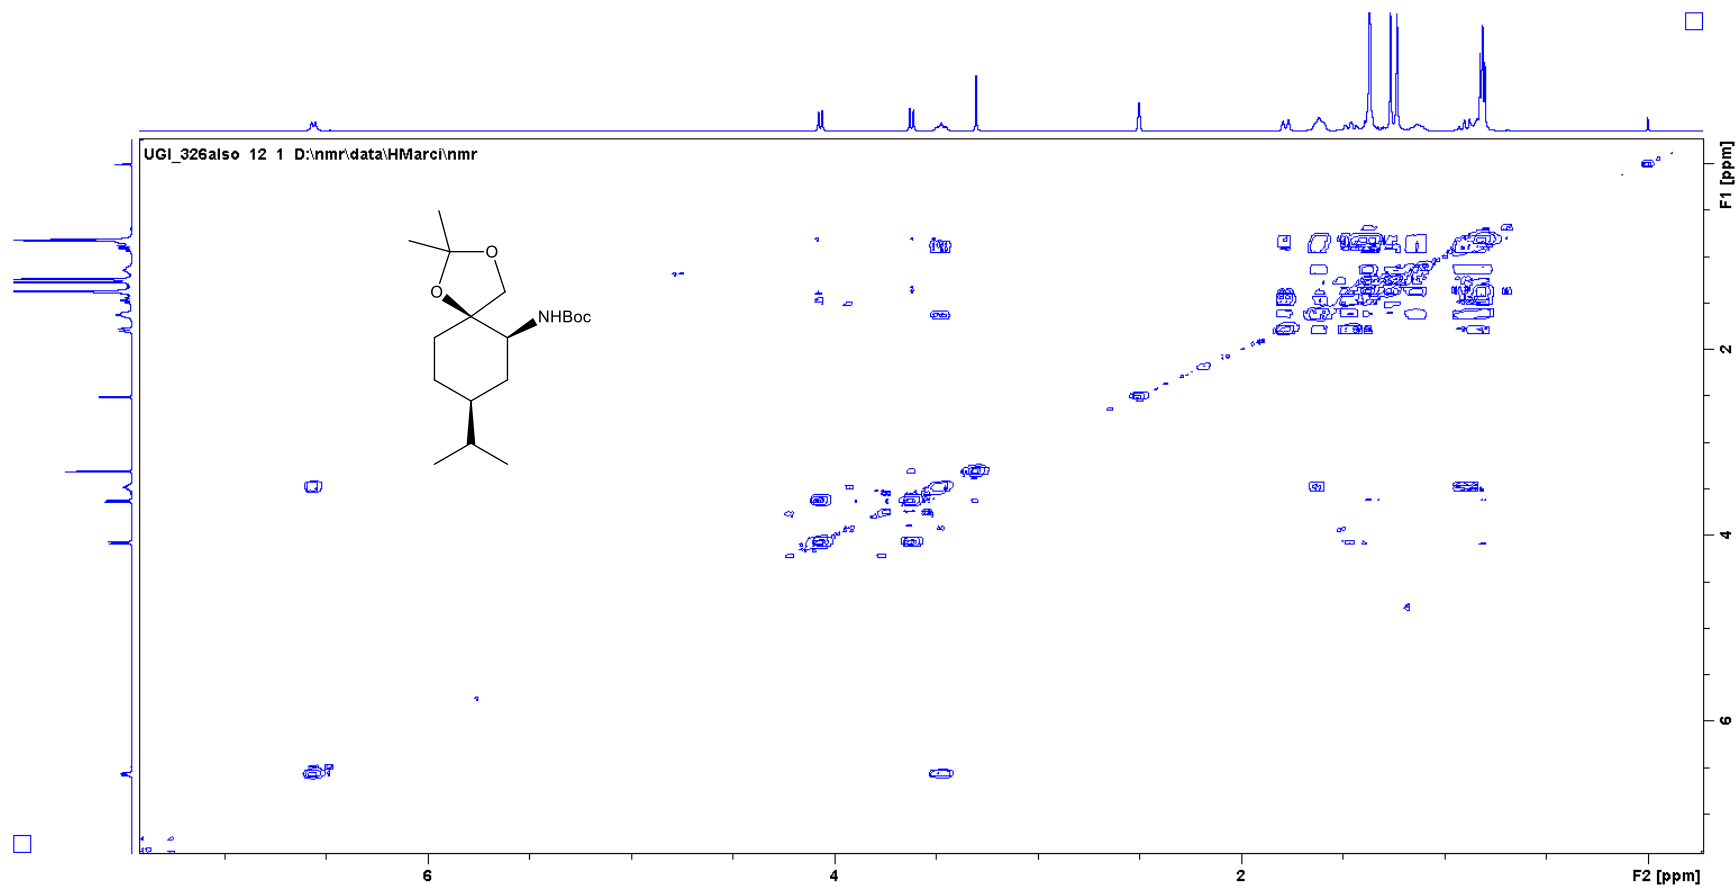

**Figure S 110: HSQC NMR of compound *tert*-Butyl ((5*R*,6*S*,8*S*)-8-isopropyl-2,2-dimethyl-1,3-dioxaspiro[4,5]decane-6-yl)carbamate **20c****

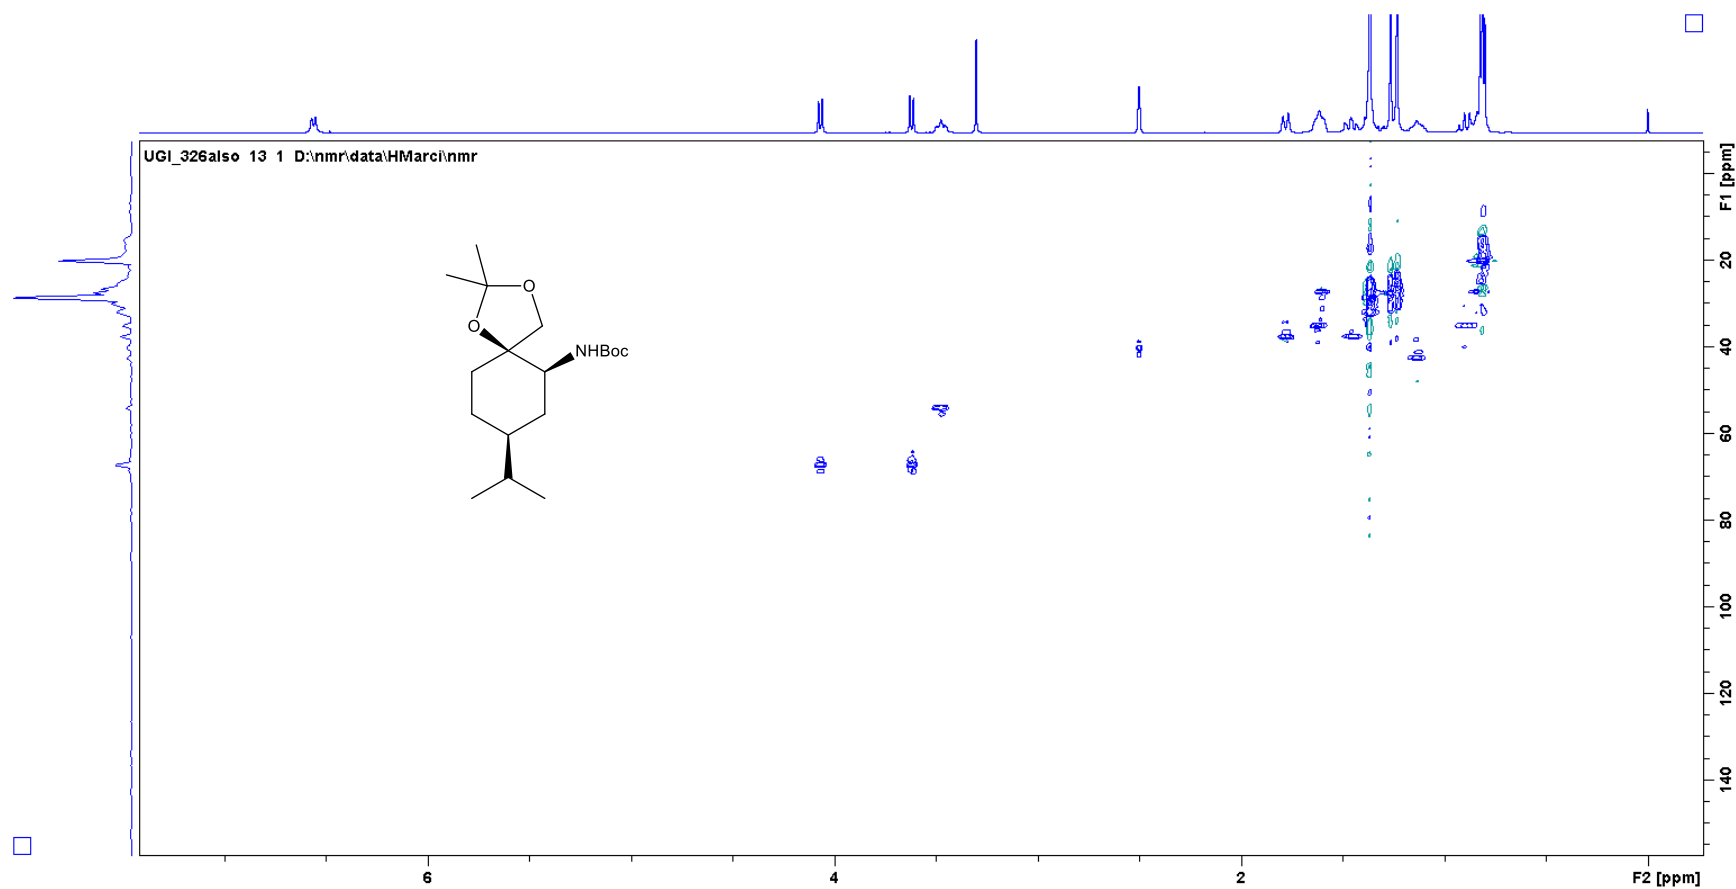

**Figure S 111:  $^1\text{H}$ -NMR of compound (1*S*,2*R*,4*S*)-2-Amino-1-hydroxymethyl-4-isopropylcyclohexanol hydrochloride **21a****

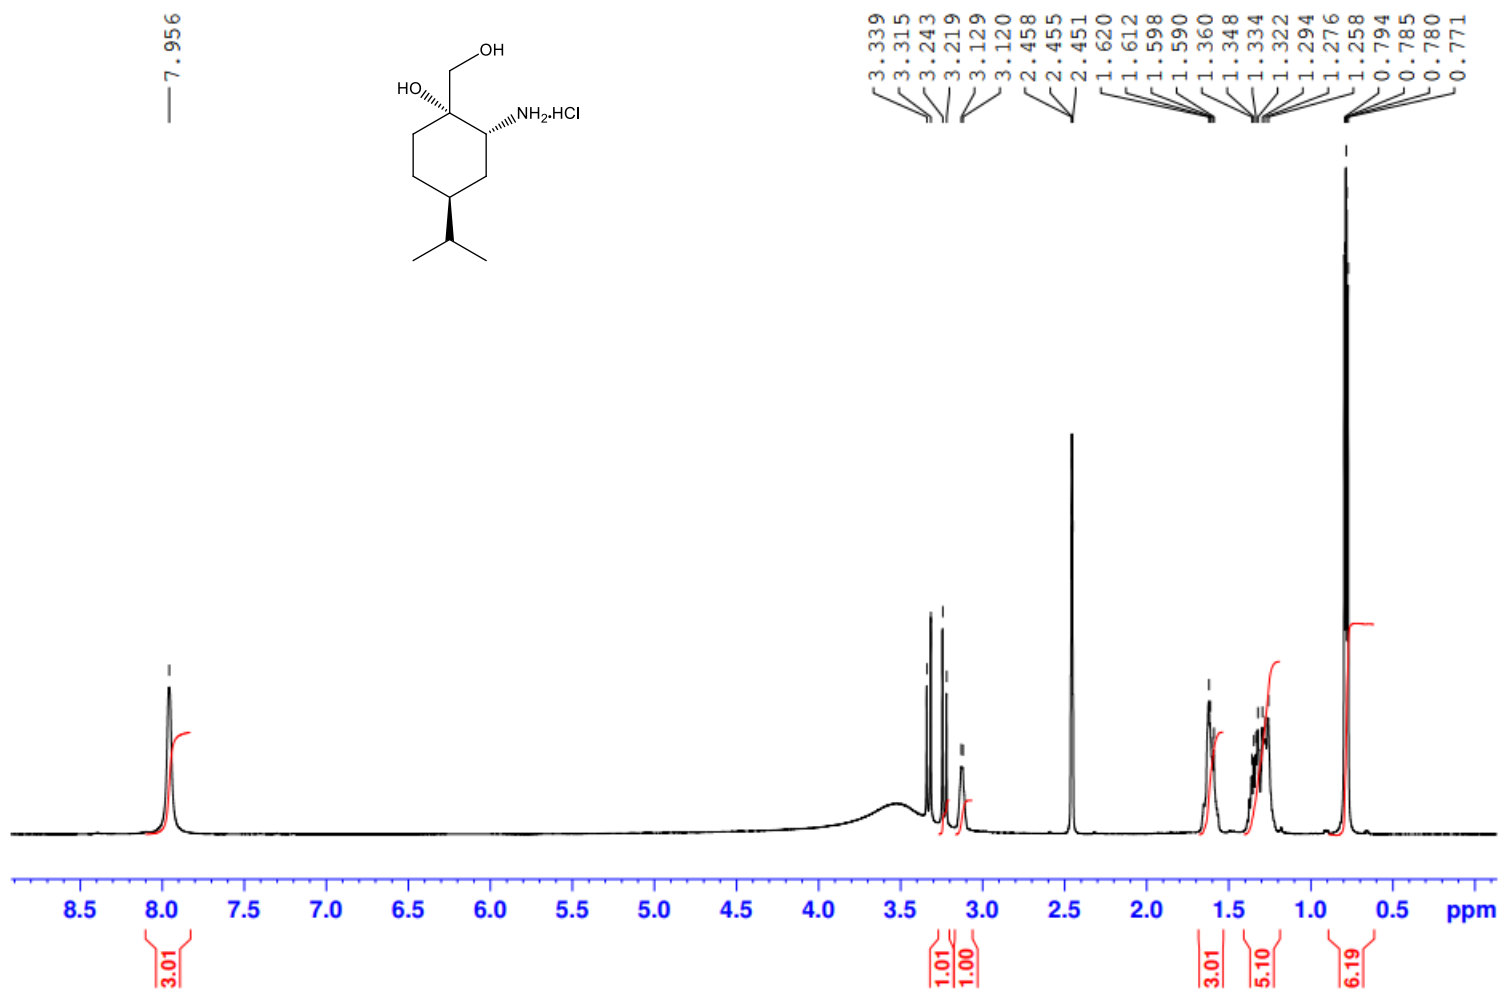

**Figure S 112:  $^{13}\text{C}$ -NMR of compound (1*S*,2*R*,4*S*)-2-Amino-1-hydroxymethyl-4-isopropylcyclohexanol hydrochloride **21a****

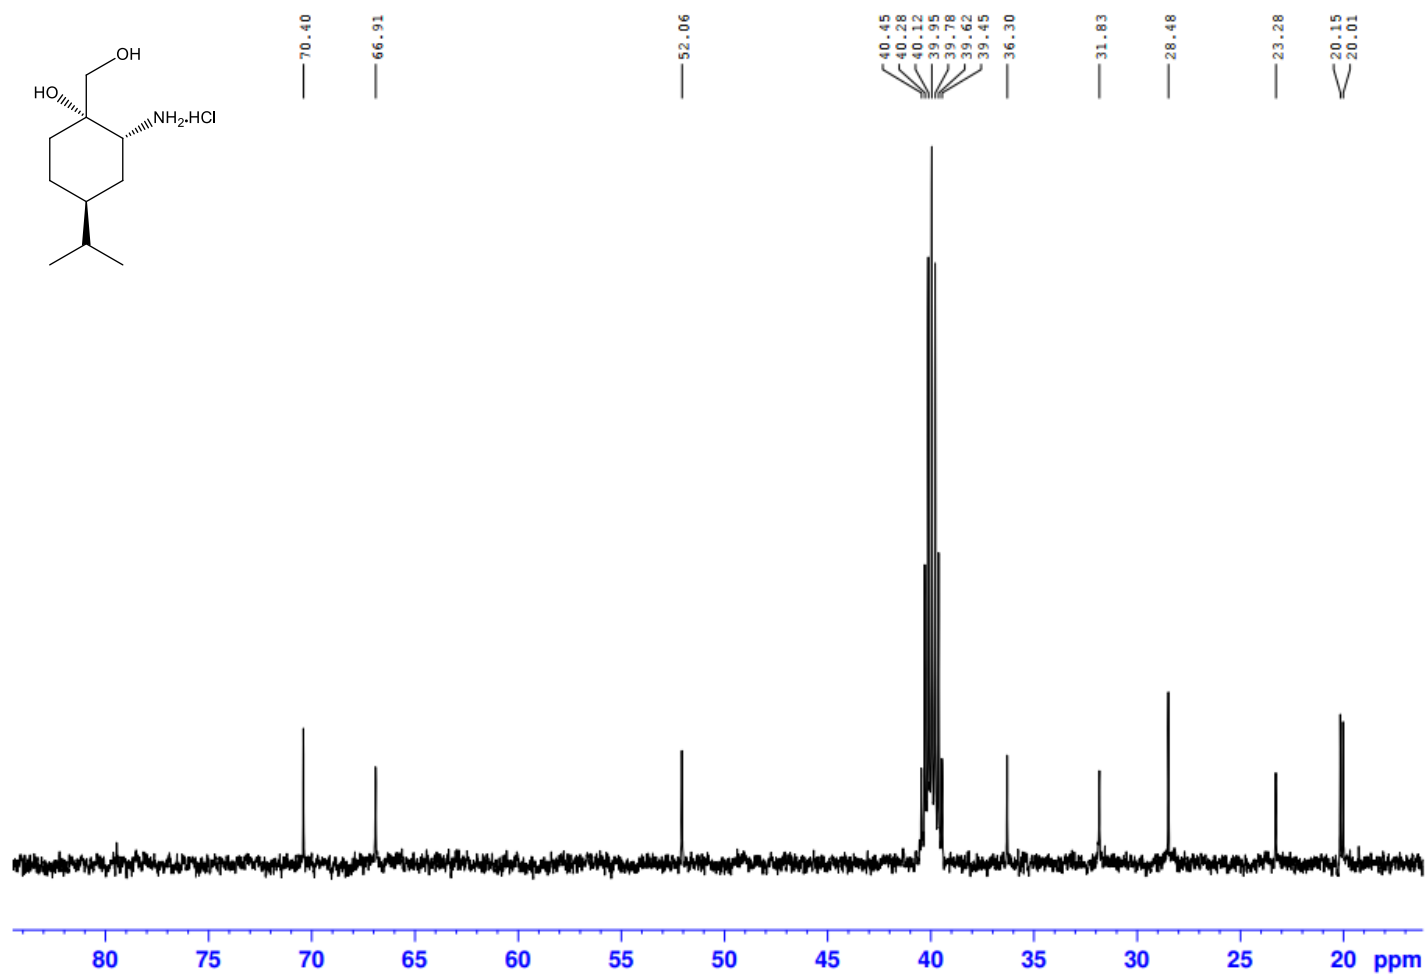

**Figure S 113: NOESY-NMR of compound (1*S*,2*R*,4*S*)-2-Amino-1-hydroxymethyl-4-isopropylcyclohexanol hydrochloride **21a****

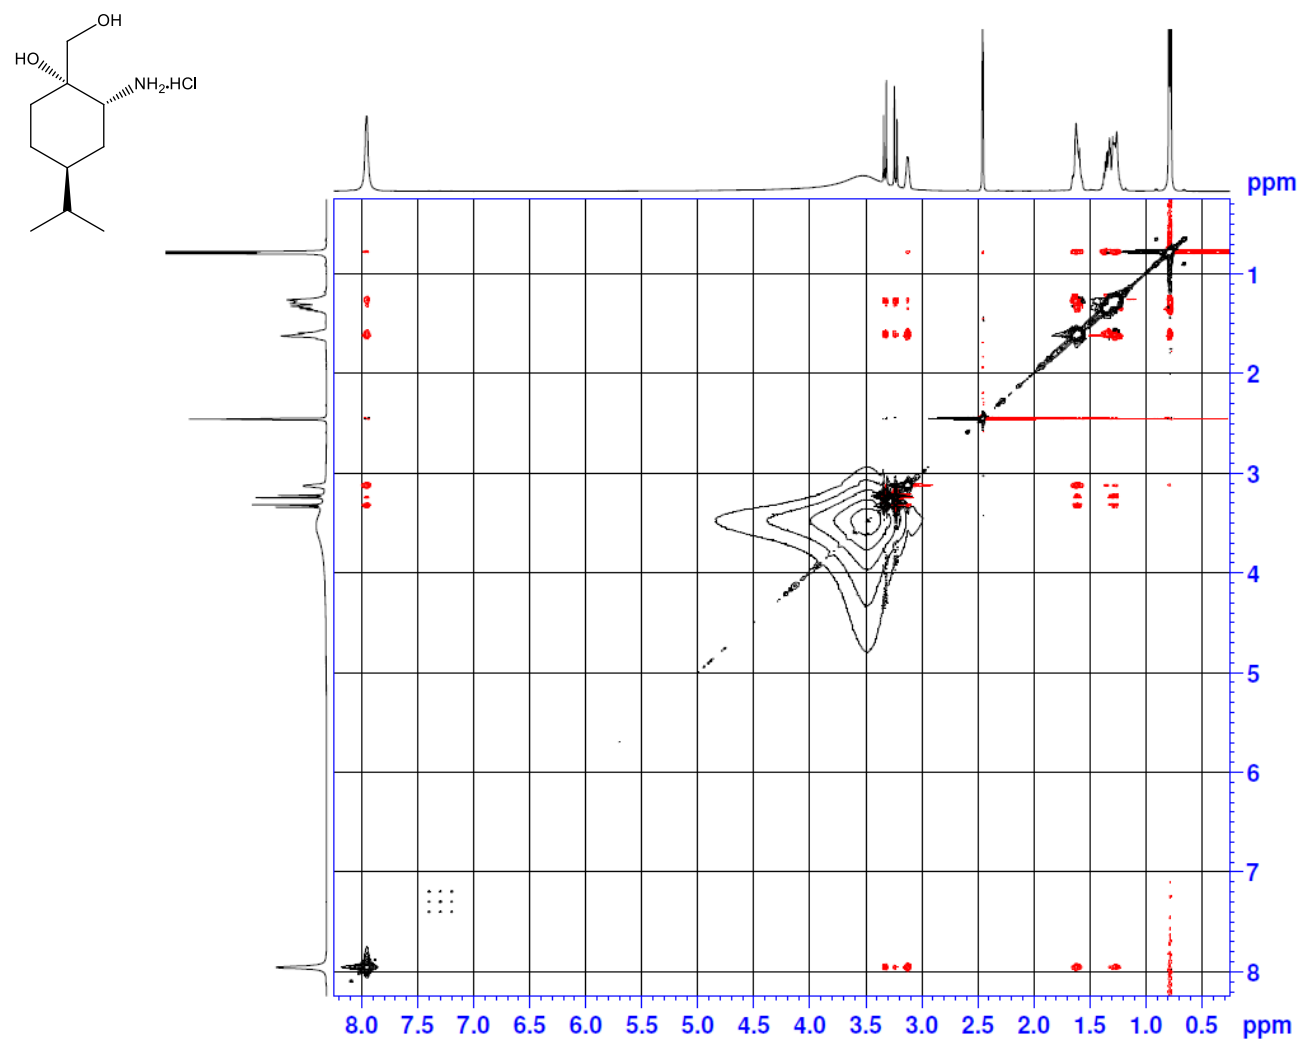

**Figure S 114:  $^1\text{H}$ -NMR of compound (1*R*,2*R*,4*S*)-2-Amino-1-hydroxymethyl-4-isopropylcyclohexanol hydrochloride **21b****

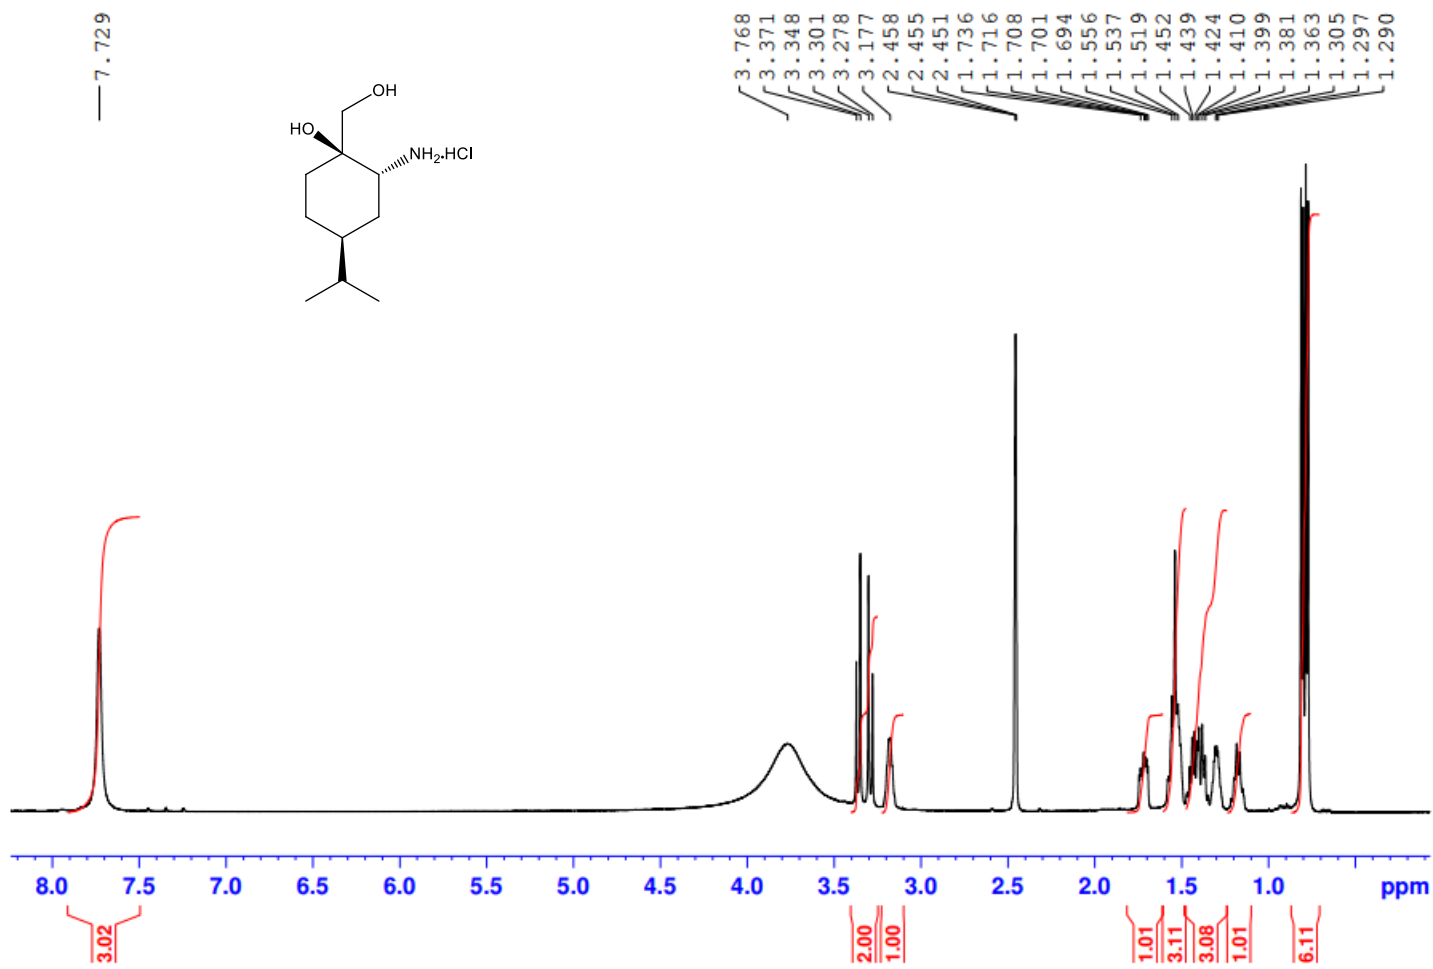



**Figure S 115:  $^{13}\text{C}$ -NMR of compound (1*R*,2*R*,4*S*)-2-Amino-1-hydroxymethyl-4-isopropylcyclohexanol hydrochloride **21b****

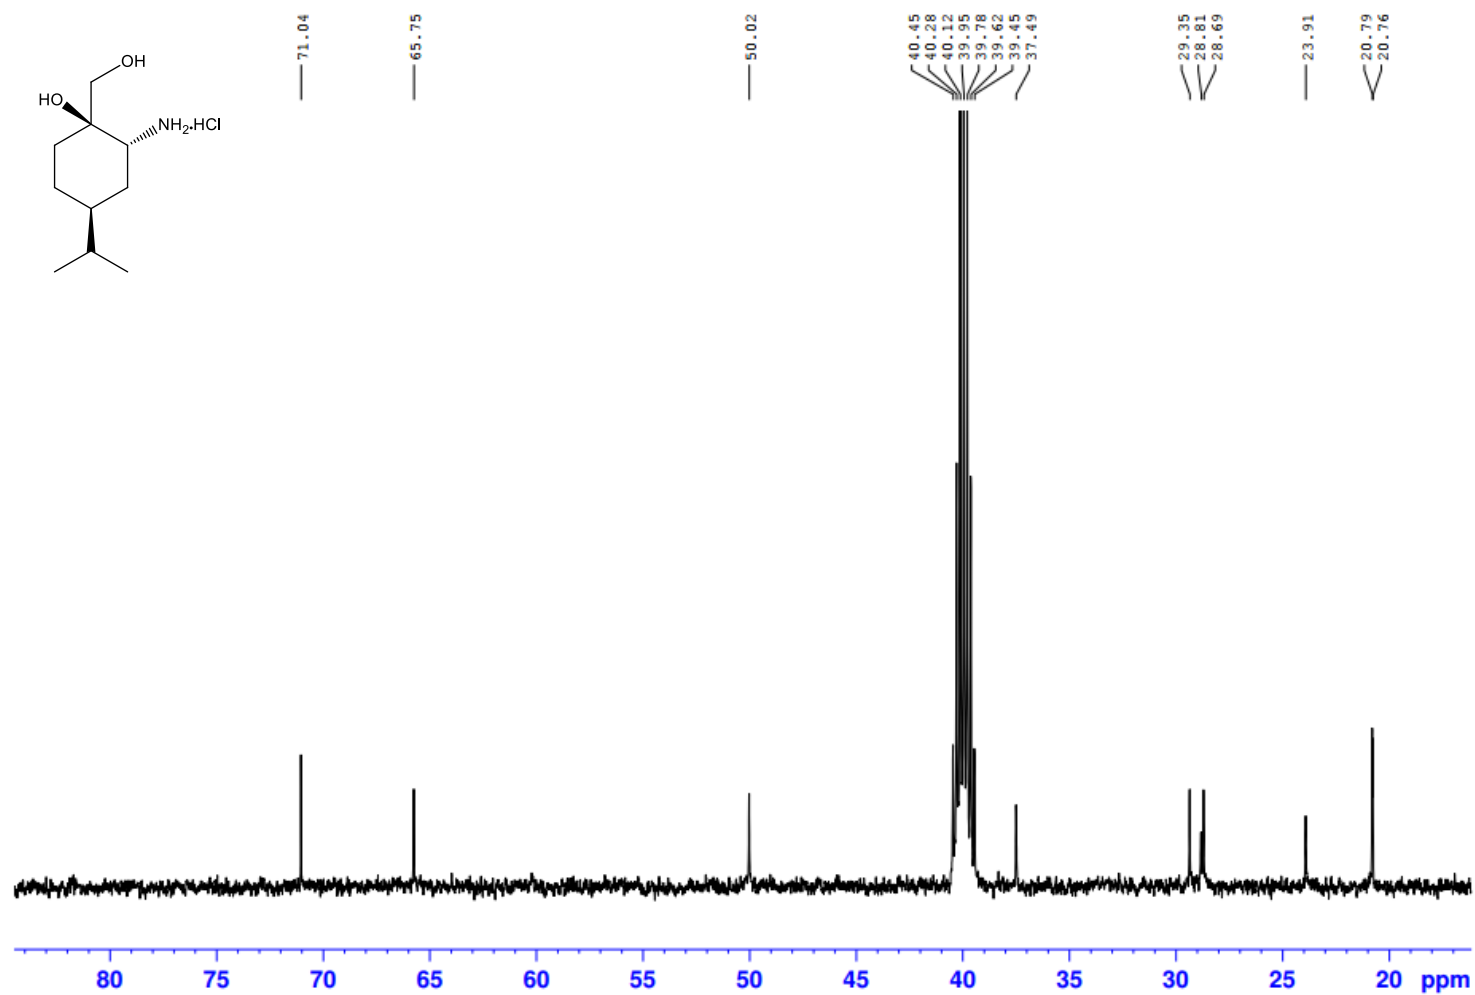

**Figure S 116: NOESY-NMR of compound (1*R*,2*R*,4*S*)-2-Amino-1-hydroxymethyl-4-isopropylcyclohexanol hydrochloride **21b****

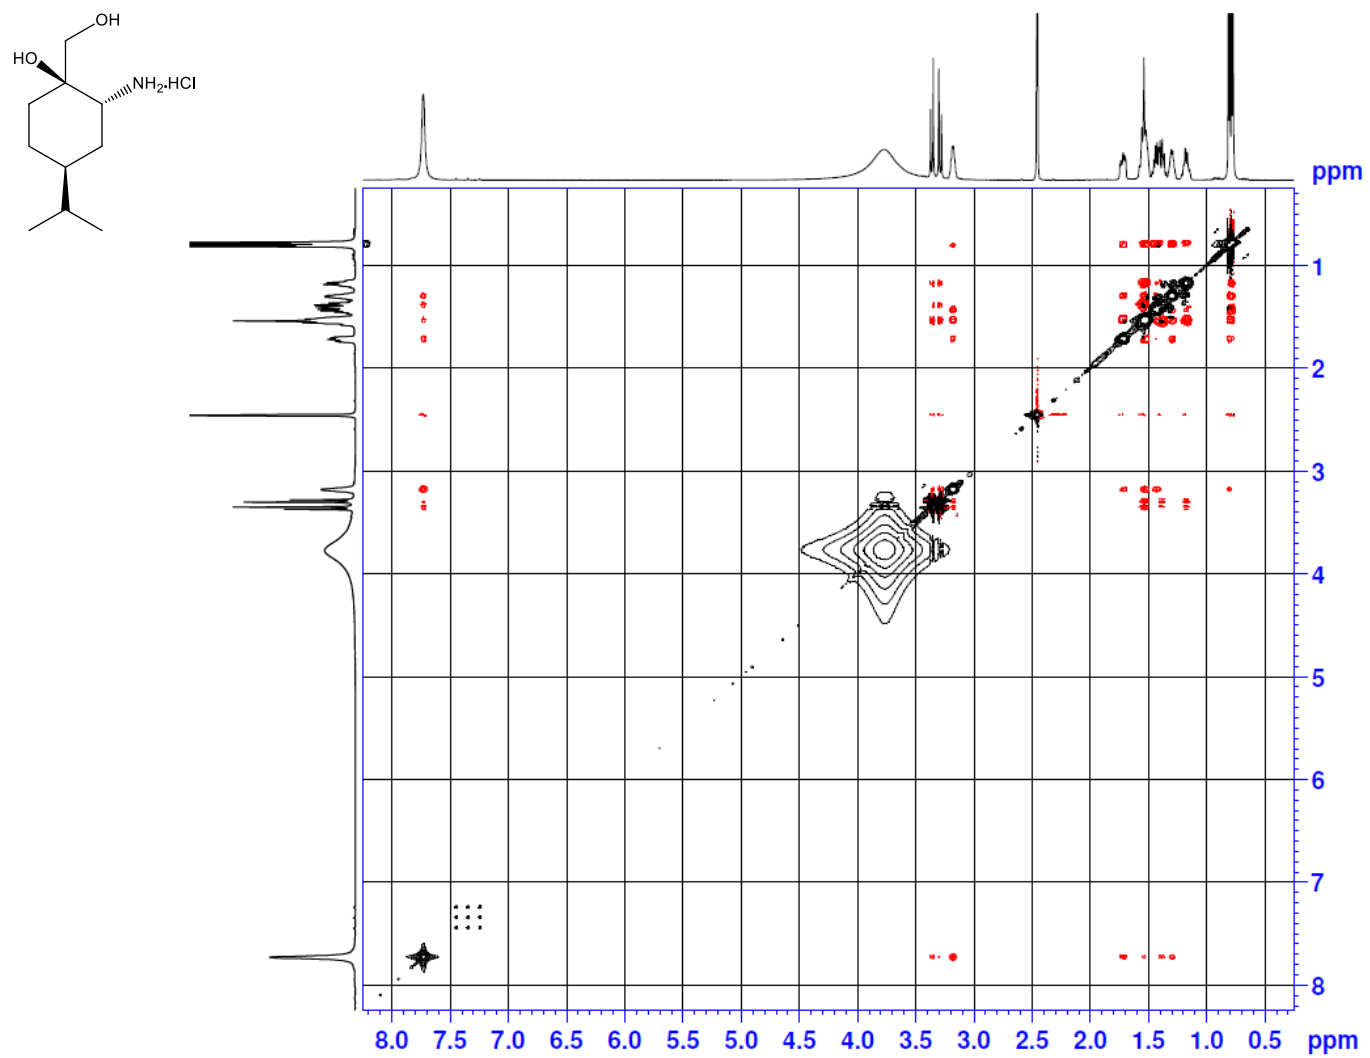

**Figure S 117:  $^1\text{H}$ -NMR of compound (1*R*,2*S*,4*S*)-2-Amino-1-hydroxymethyl-4-isopropylcyclohexanol hydrochloride **21c****

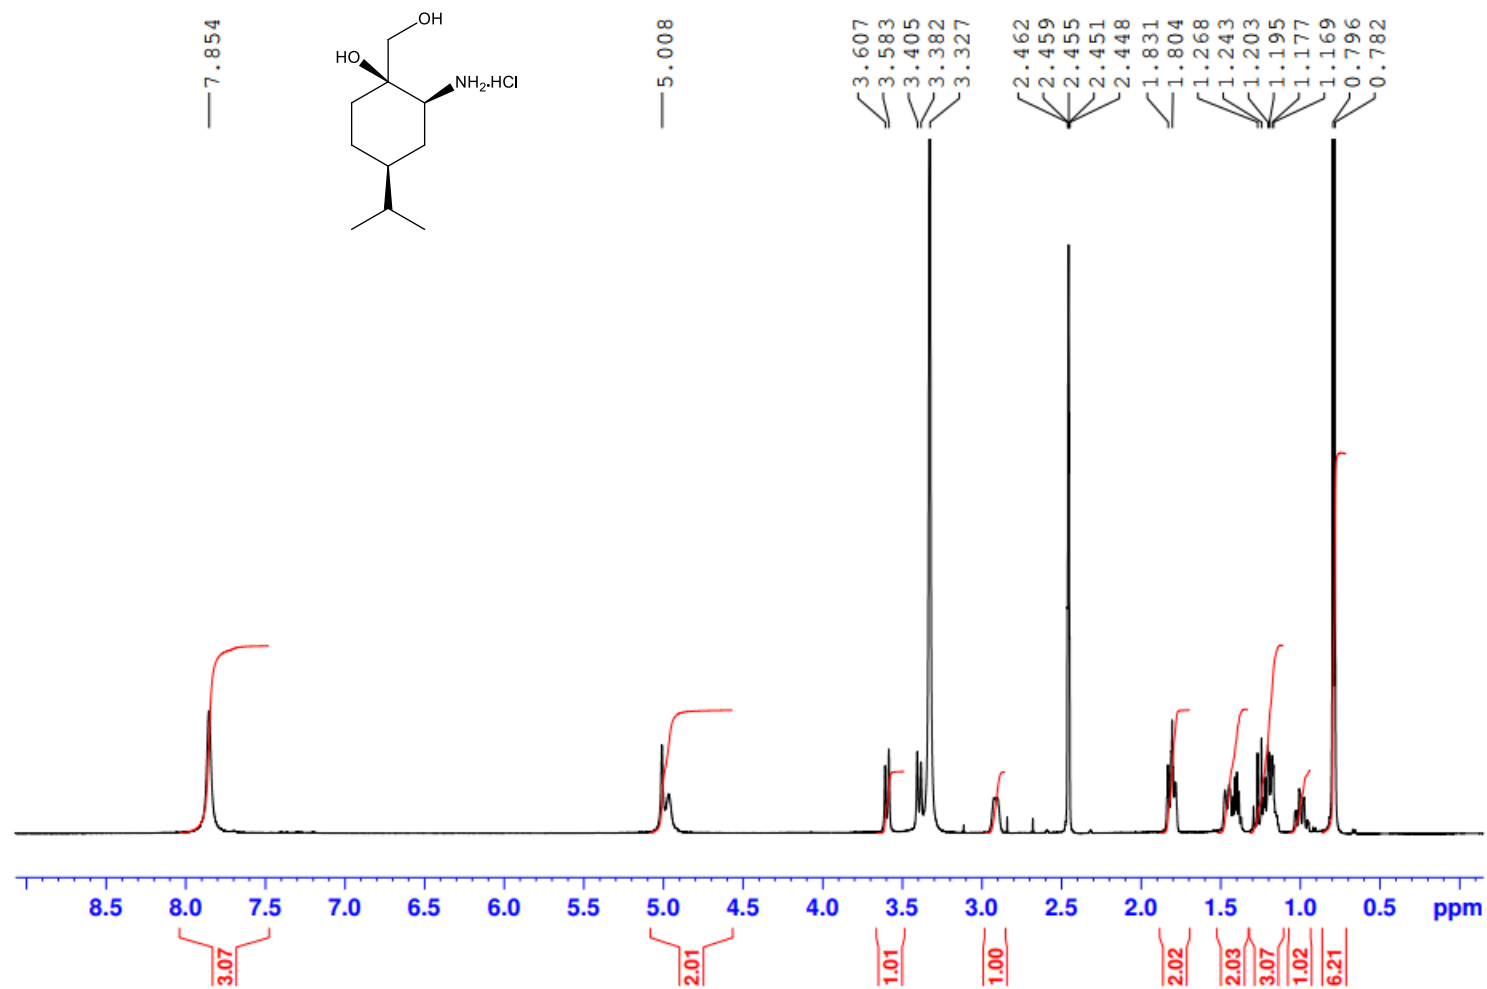

**Figure S 118:**  $^{13}\text{C}$ -NMR of compound (1*R*,2*S*,4*S*)-2-Amino-1-hydroxymethyl-4-isopropylcyclohexanol hydrochloride **21c**

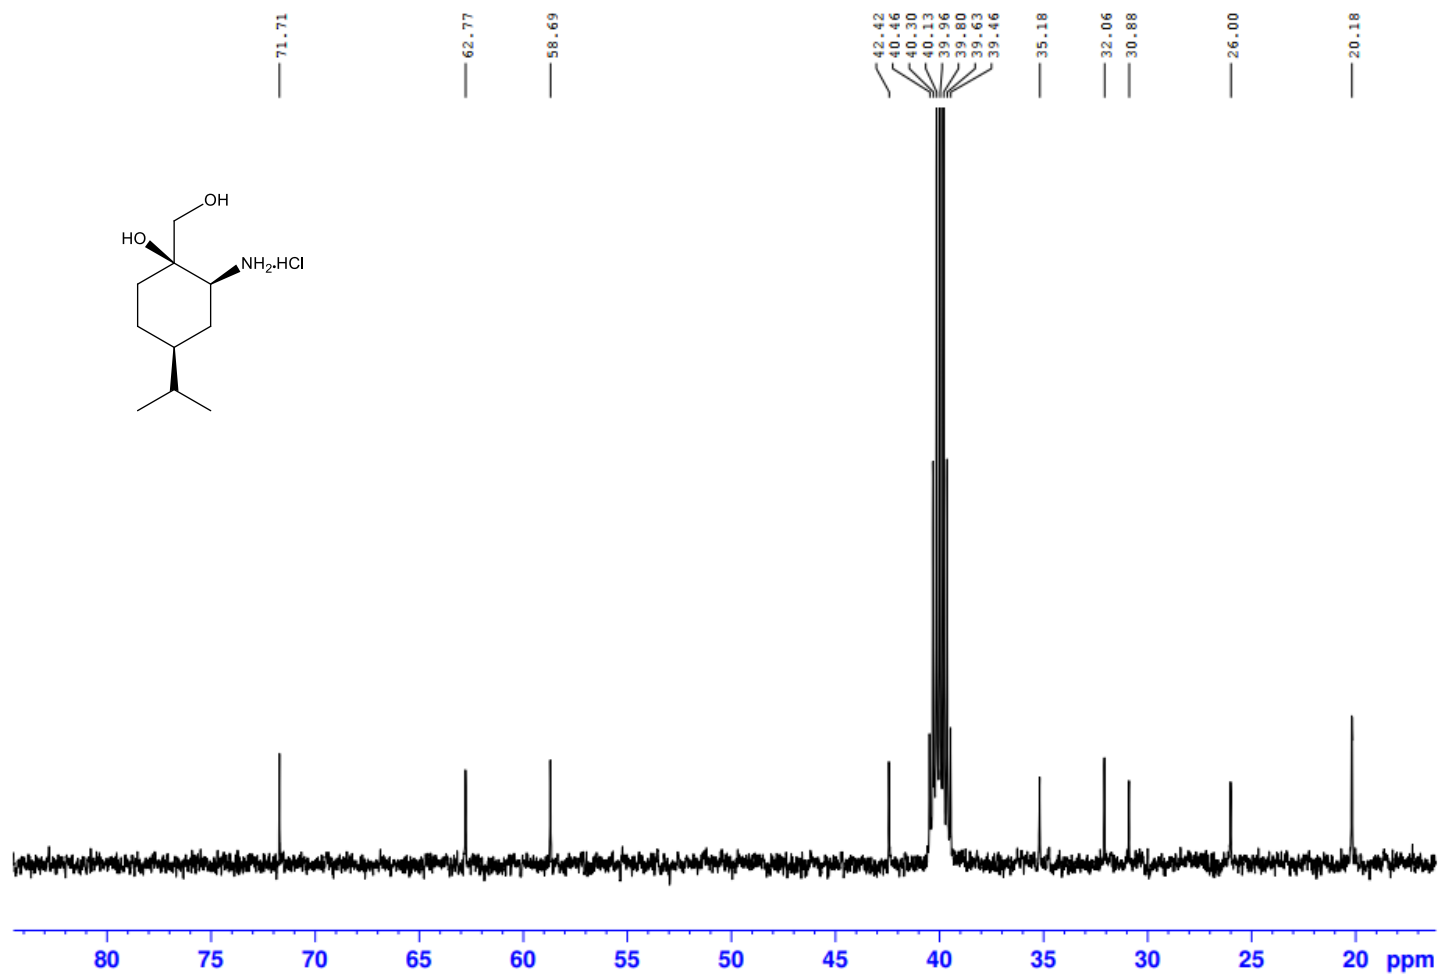

**Figure S 119: NOESY-NMR of compound (1*R*,2*S*,4*S*)-2-Amino-1-hydroxymethyl-4-isopropylcyclohexanol hydrochloride **21c****

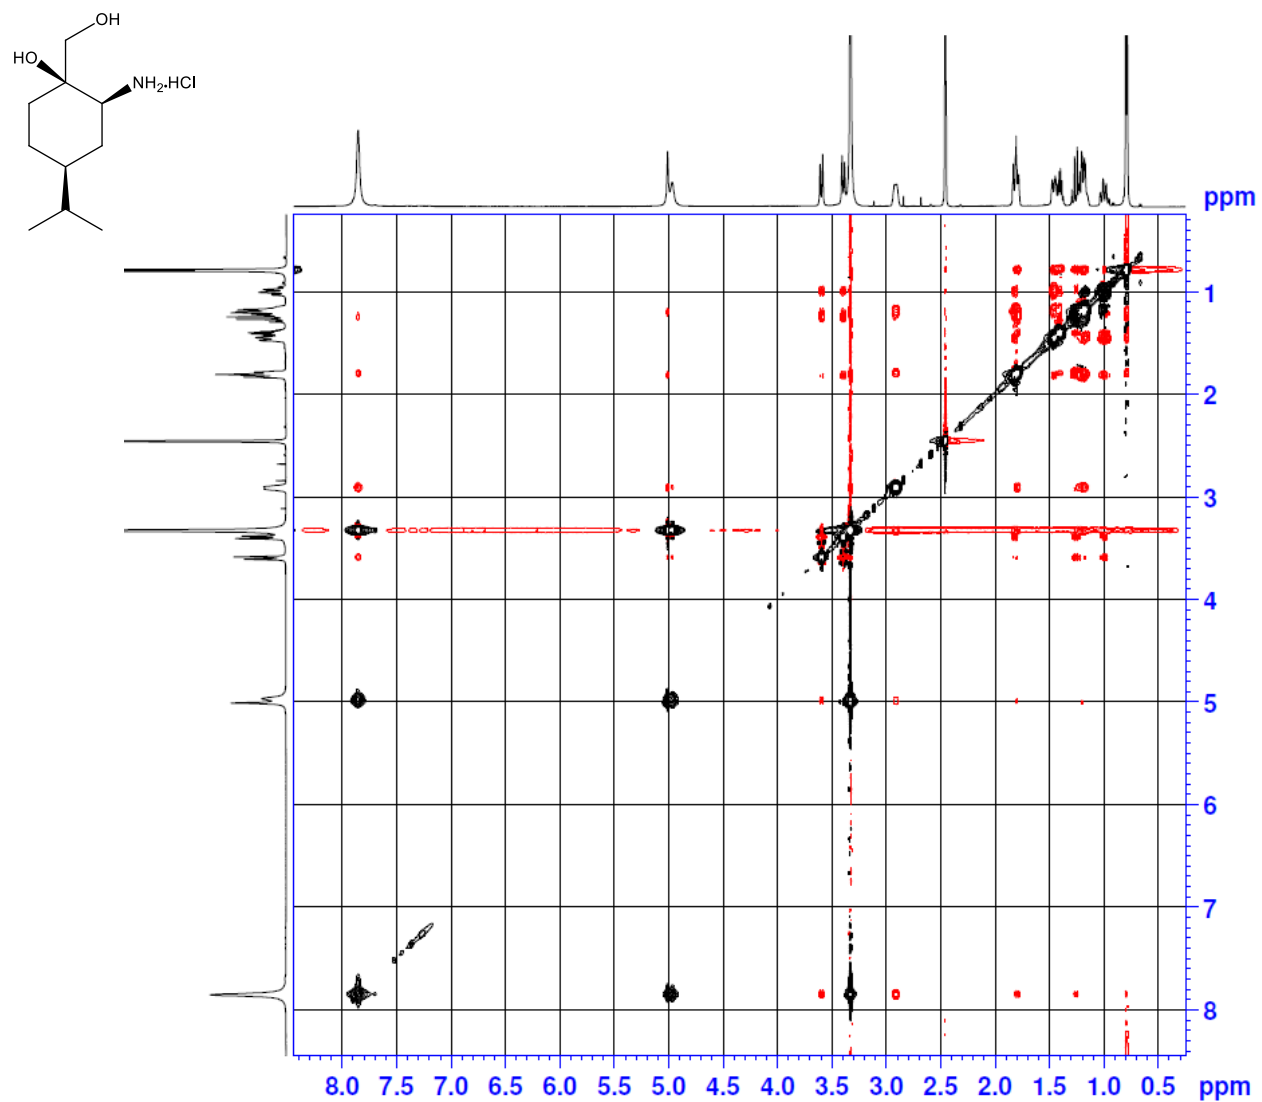

Figure S 120:  $^1\text{H}$ -NMR of compound (1*S*,2*R*,4*S*)-2-Benzylamino-1-hydroxymethyl-4-isopropylcyclohexanol **23a**

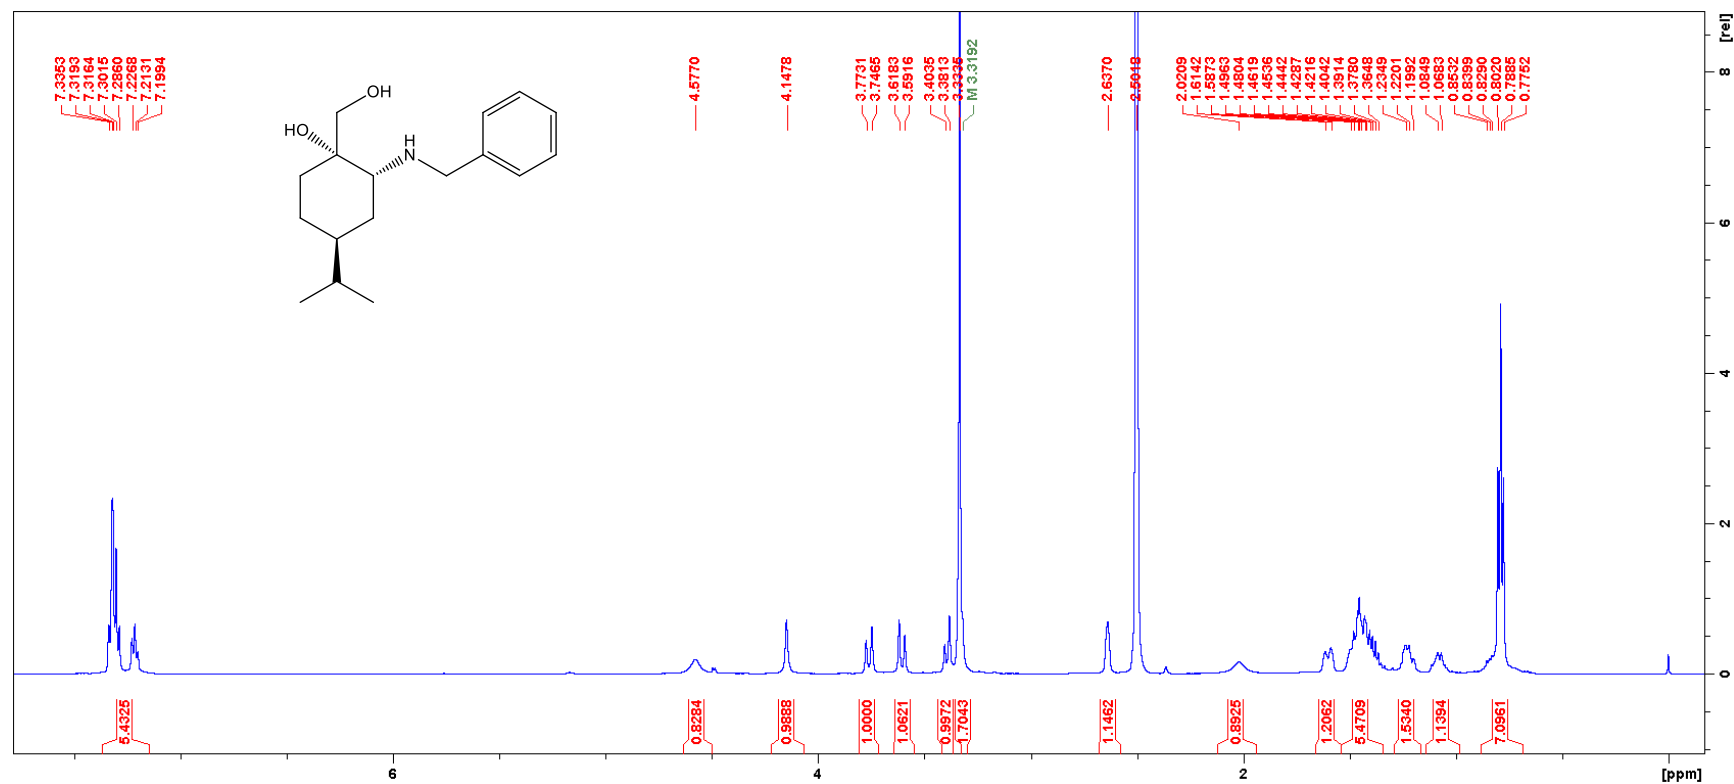

**Figure S 121:  $^{13}\text{C}$ -NMR of compound (1*S*,2*R*,4*S*)-2-Benzylamino-1-hydroxymethyl-4-isopropylcyclohexanol **23a****

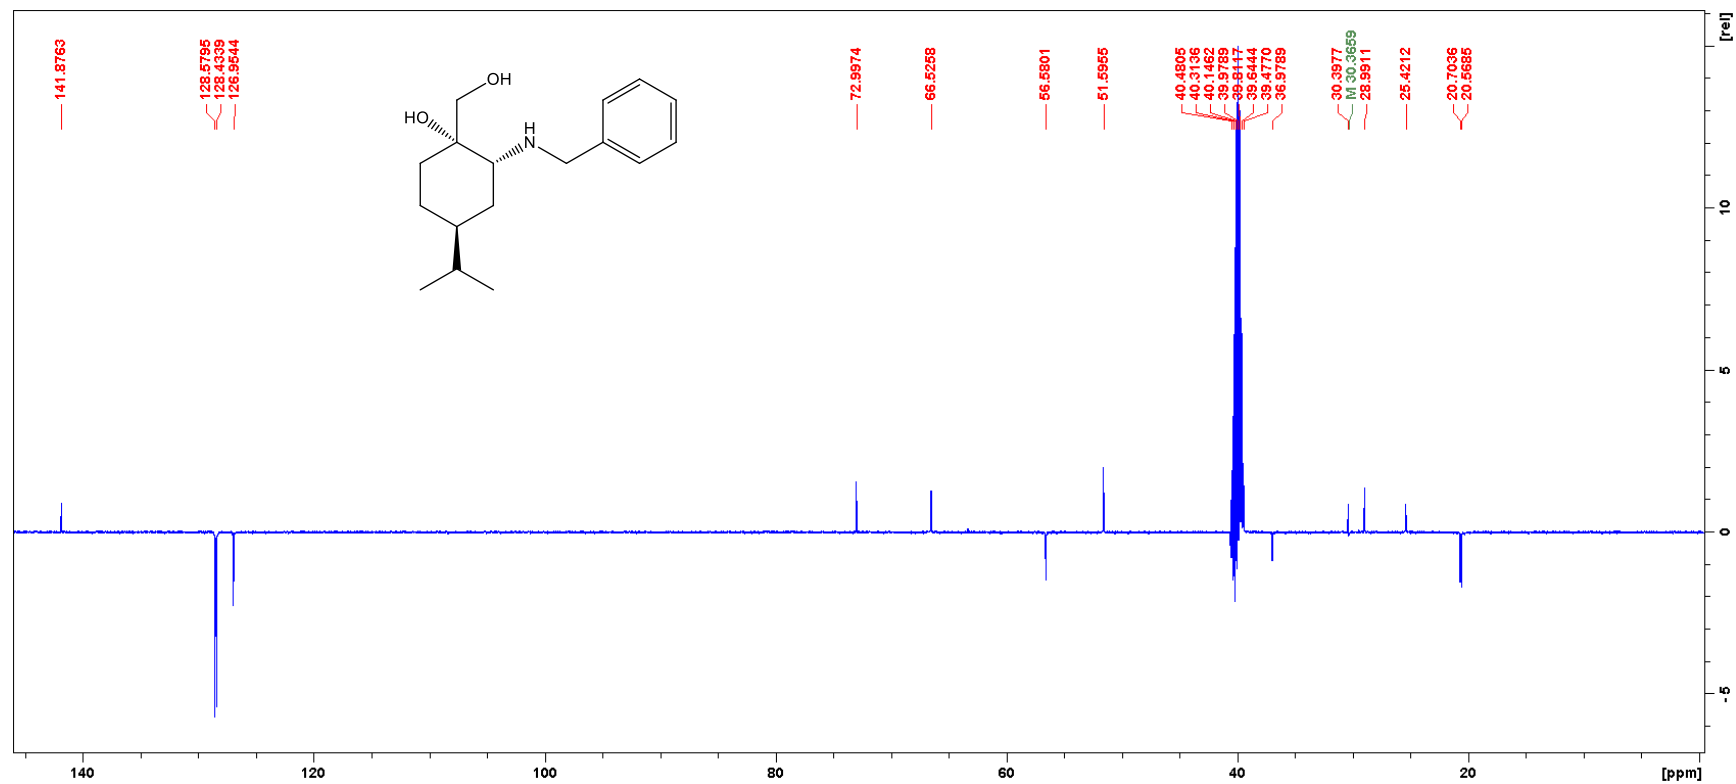

**Figure S 122: COSY NMR of compound (1*S*,2*R*,4*S*)-2-Benzylamino-1-hydroxymethyl-4-isopropylcyclohexanol **23a****

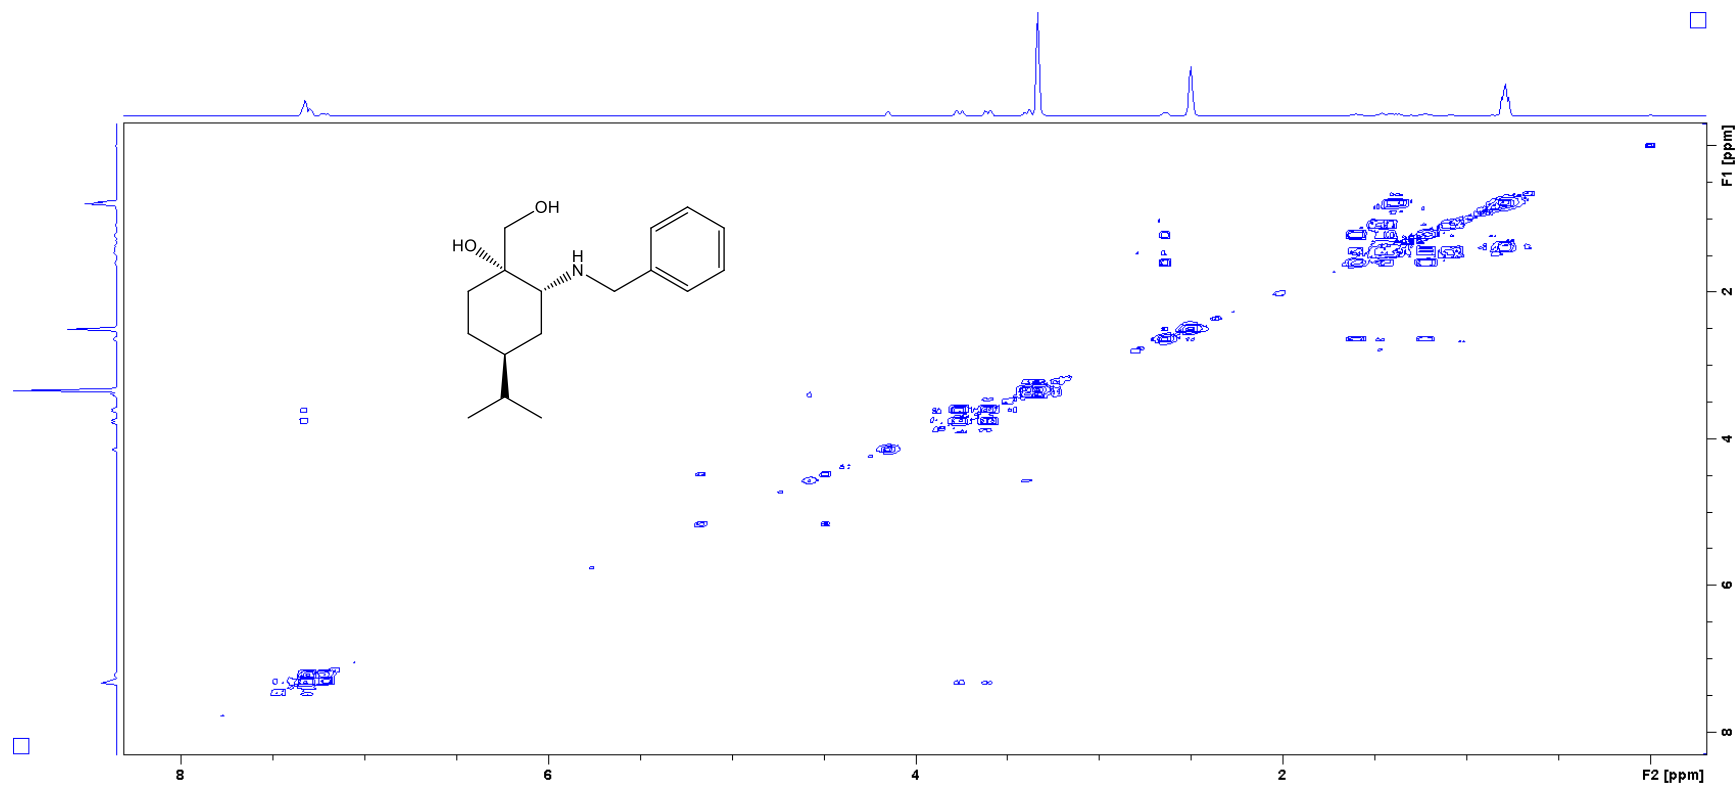



**Figure S 123: NOESY NMR of compound (1*S*,2*R*,4*S*)-2-Benzylamino-1-hydroxymethyl-4-isopropylcyclohexanol **23a****

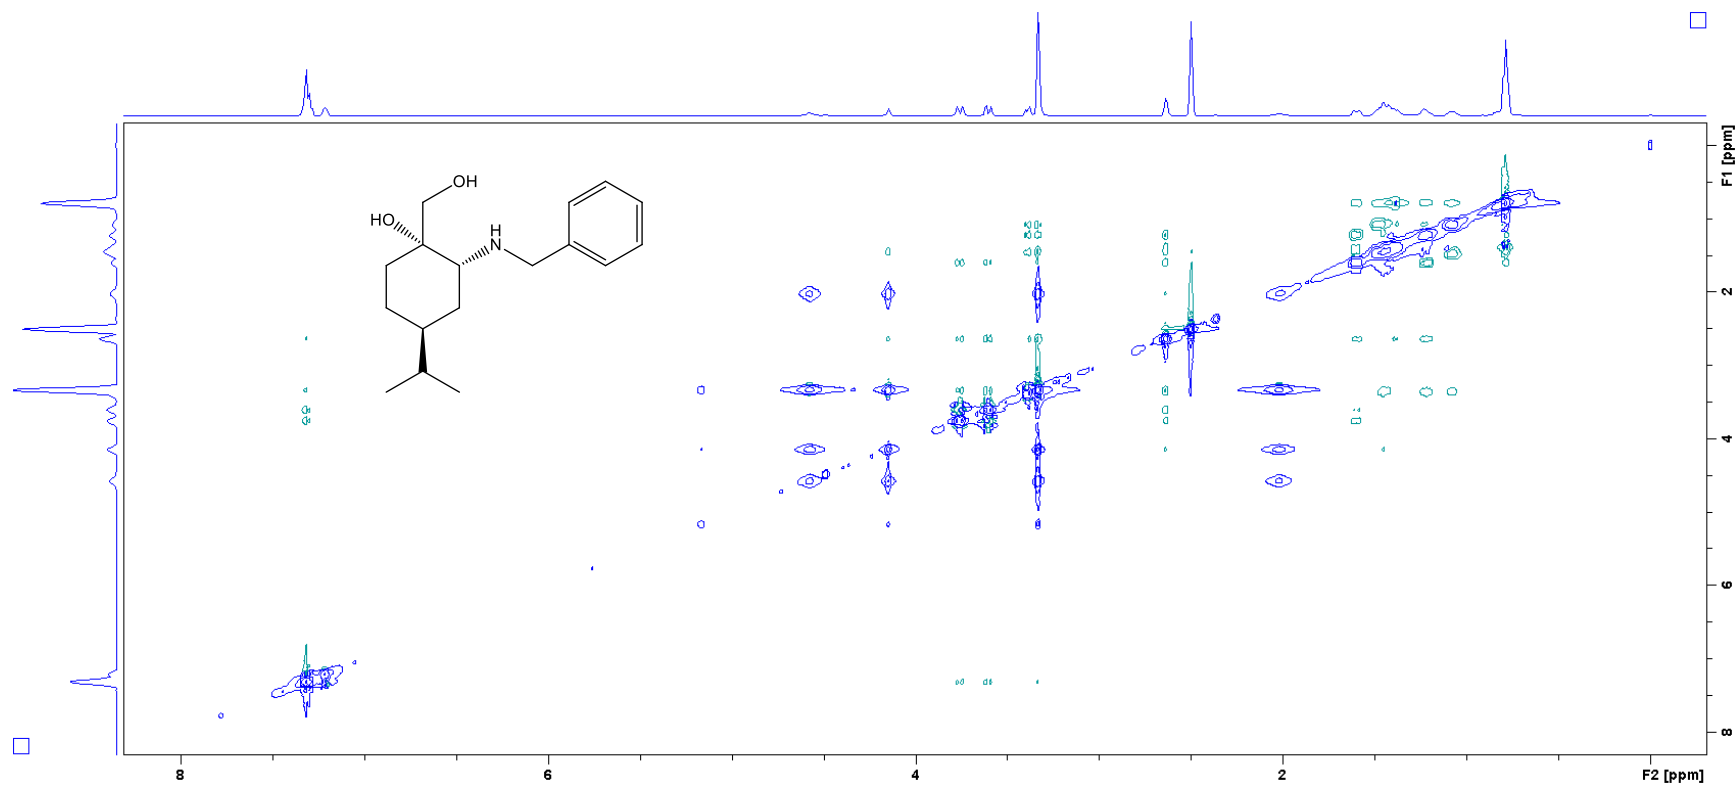

**Figure S 124: HSQC NMR of compound (1*S*,2*R*,4*S*)-2-Benzylamino-1-hydroxymethyl-4-isopropylcyclohexanol 23a**

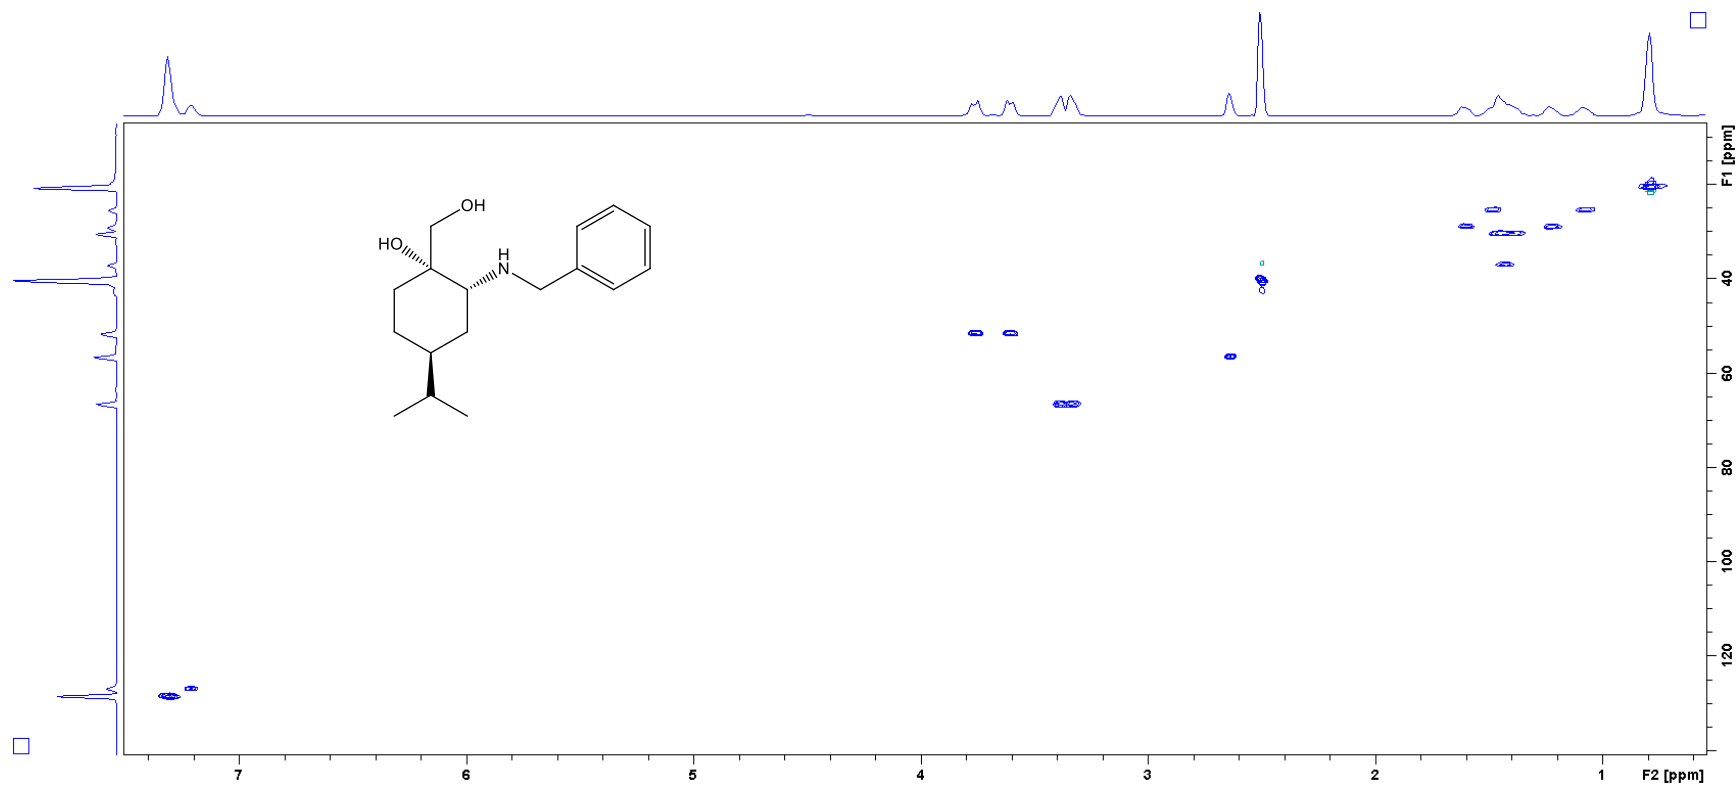

Figure S 125:  $^1\text{H}$ -NMR of compound (1*R*,2*R*,4*S*)-2-Benzylamino-1-hydroxymethyl-4-isopropylcyclohexanol **23b**

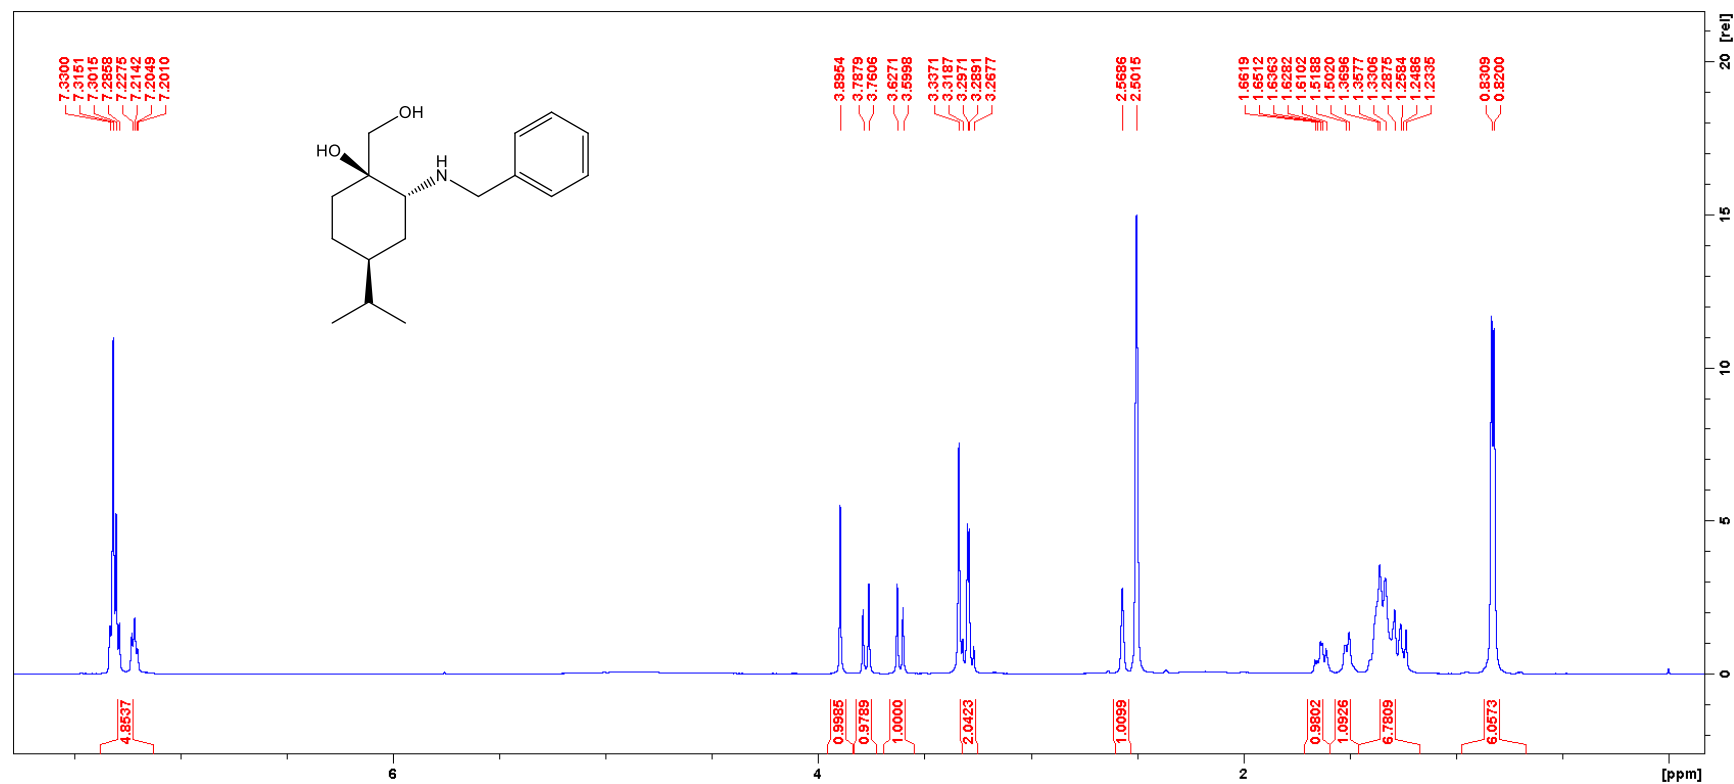

**Figure S 125:  $^{13}\text{C}$ -NMR of compound (1*R*,2*R*,4*S*)-2-Benzylamino-1-hydroxymethyl-4-isopropylcyclohexanol **23b****

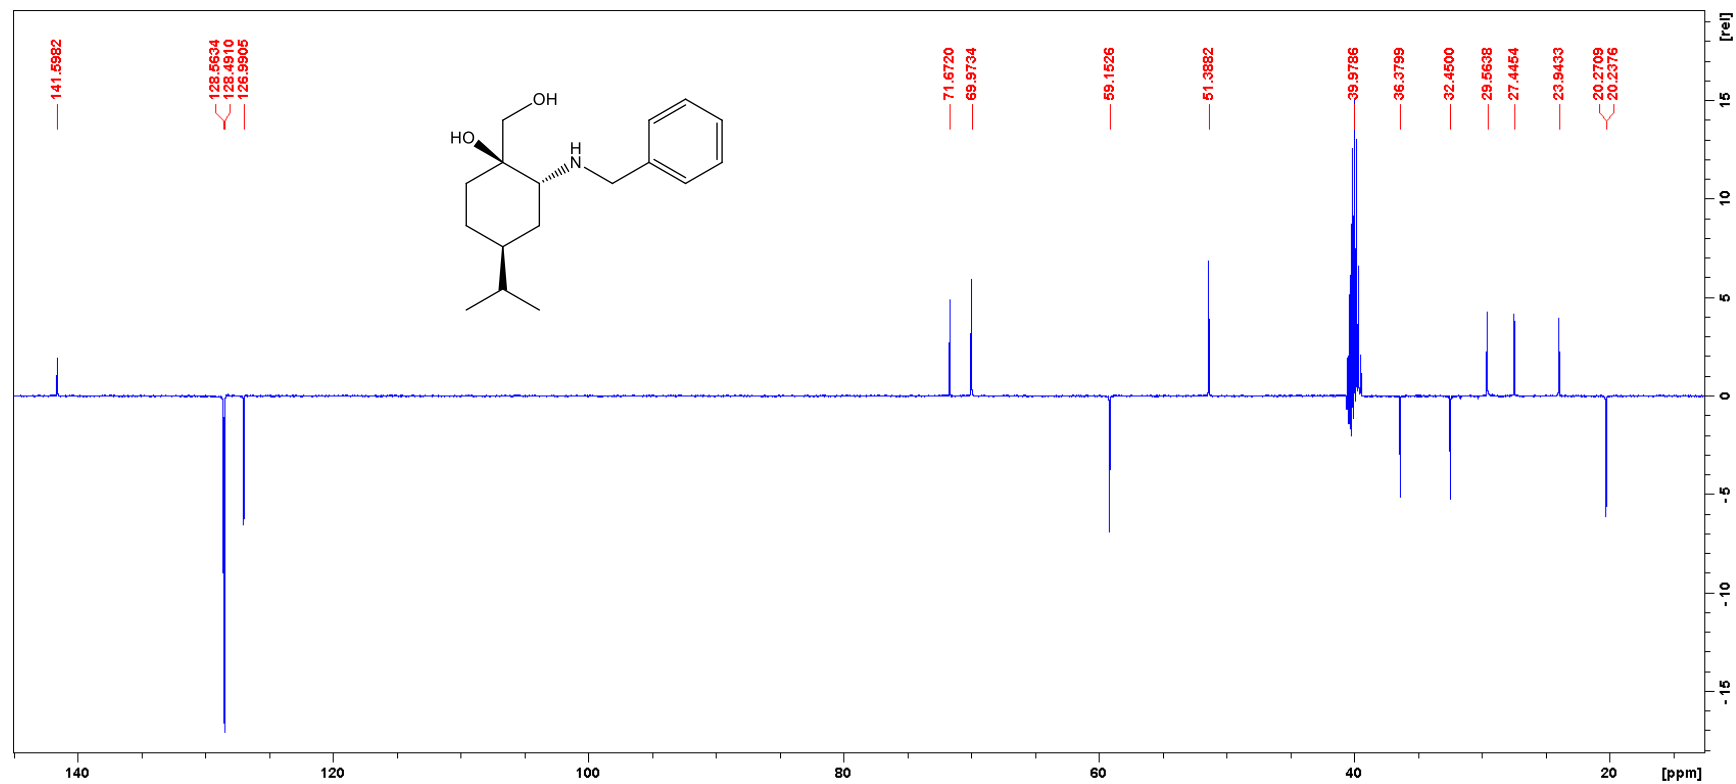

**Figure S 127: COSY NMR of compound (1*R*,2*R*,4*S*)-2-Benzylamino-1-hydroxymethyl-4-isopropylcyclohexanol **23b****

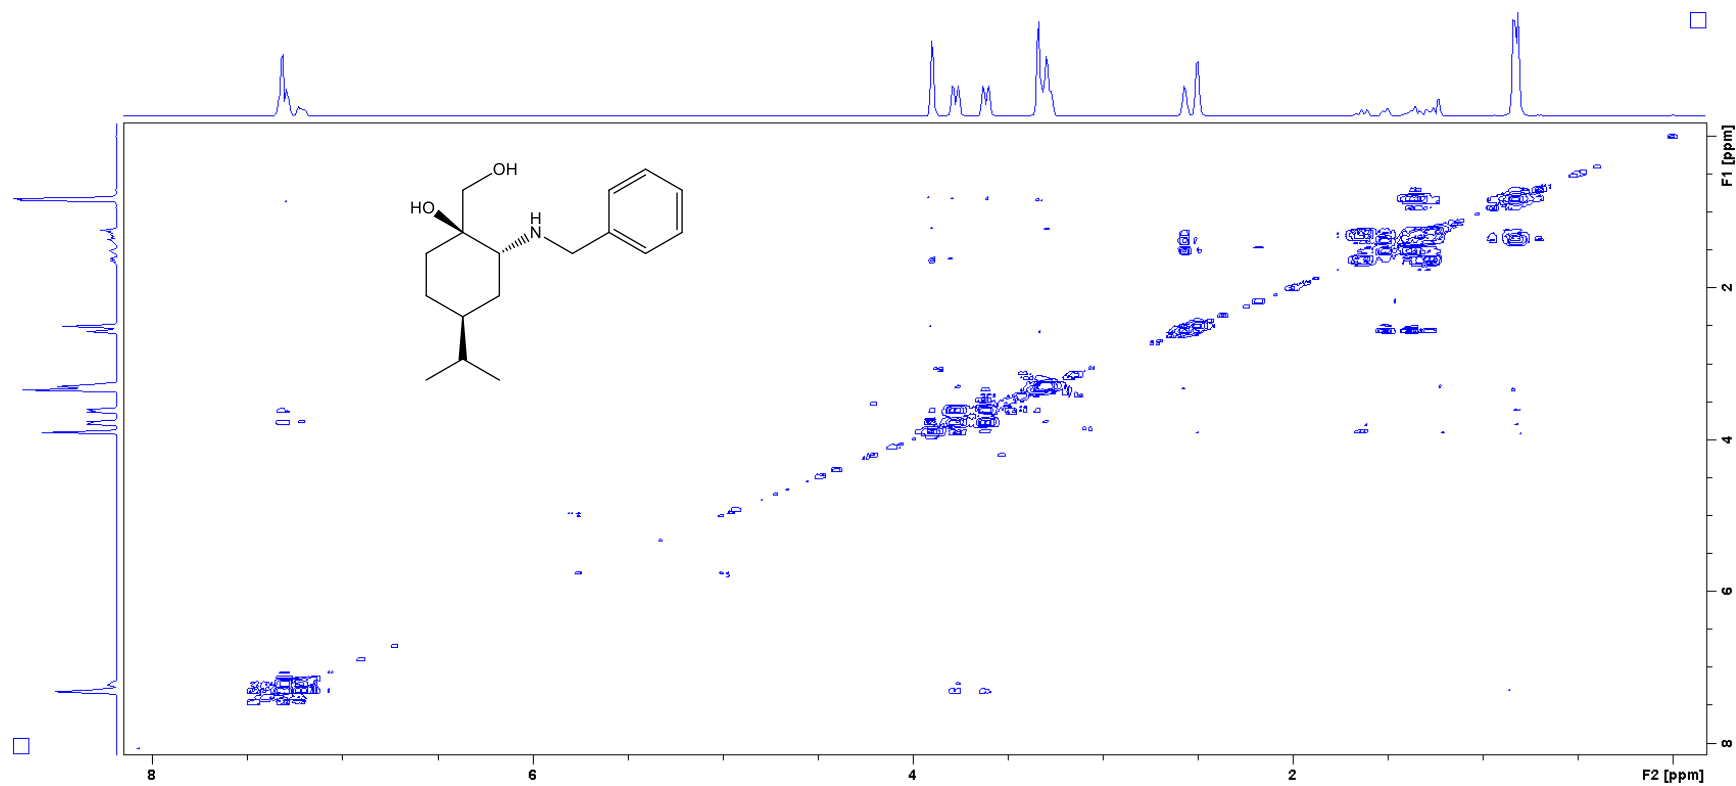

**Figure S 128: NOESY NMR of compound (1*R*,2*R*,4*S*)-2-Benzylamino-1-hydroxymethyl-4-isopropylcyclohexanol **23b****

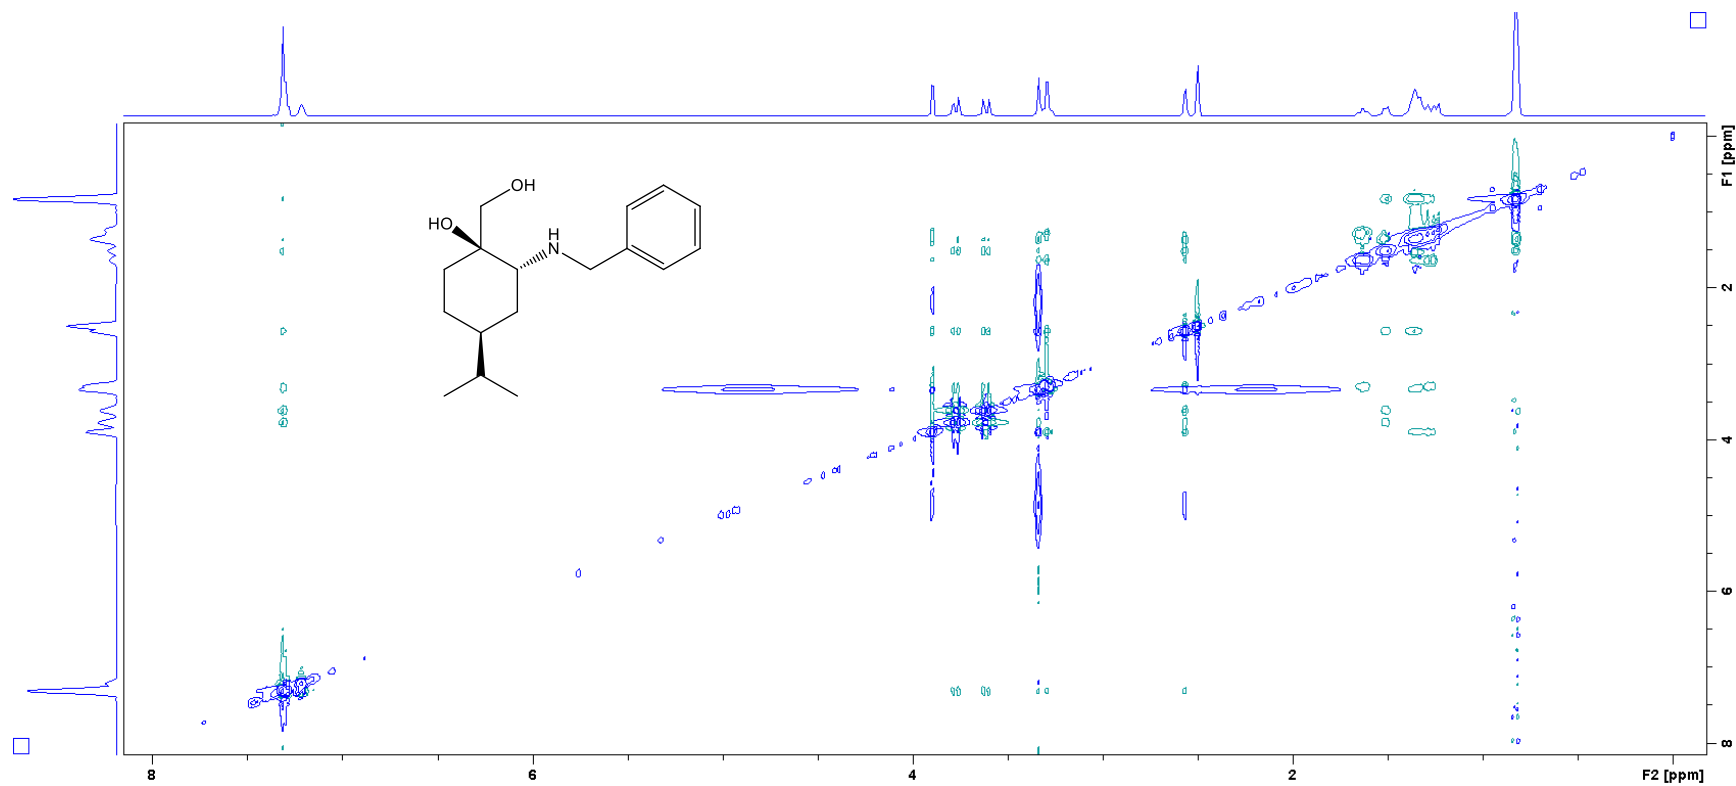

**Figure S 129: HSQC NMR of compound (1*R*,2*R*,4*S*)-2-Benzylamino-1-hydroxymethyl-4-isopropylcyclohexanol **23b****

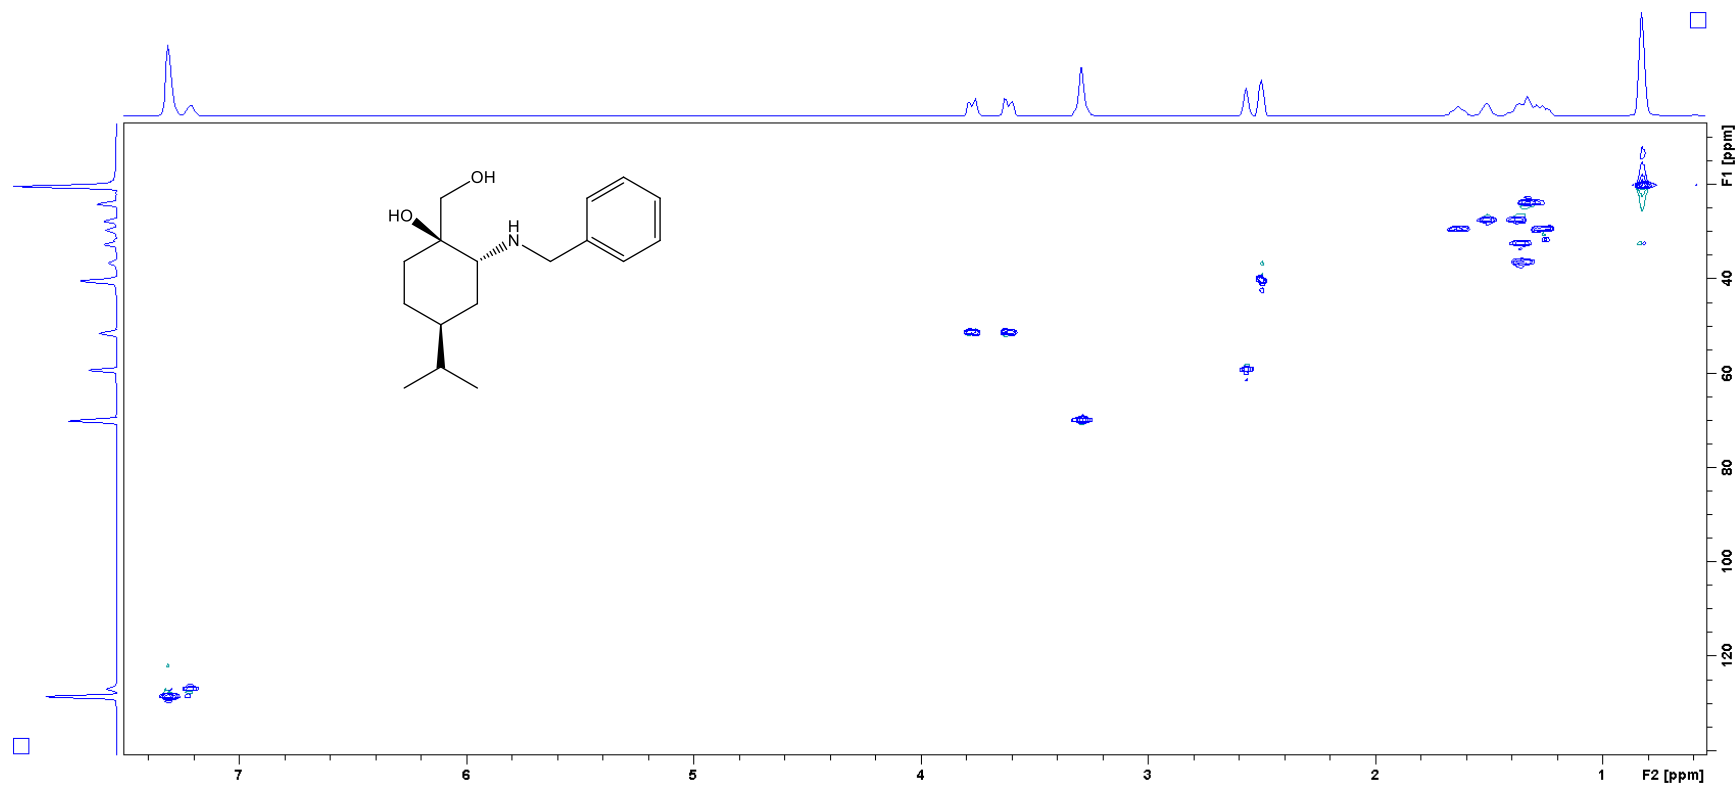

**Figure S 130: HMBC NMR of compound (1*R*,2*R*,4*S*)-2-Benzylamino-1-hydroxymethyl-4-isopropylcyclohexanol **23b****

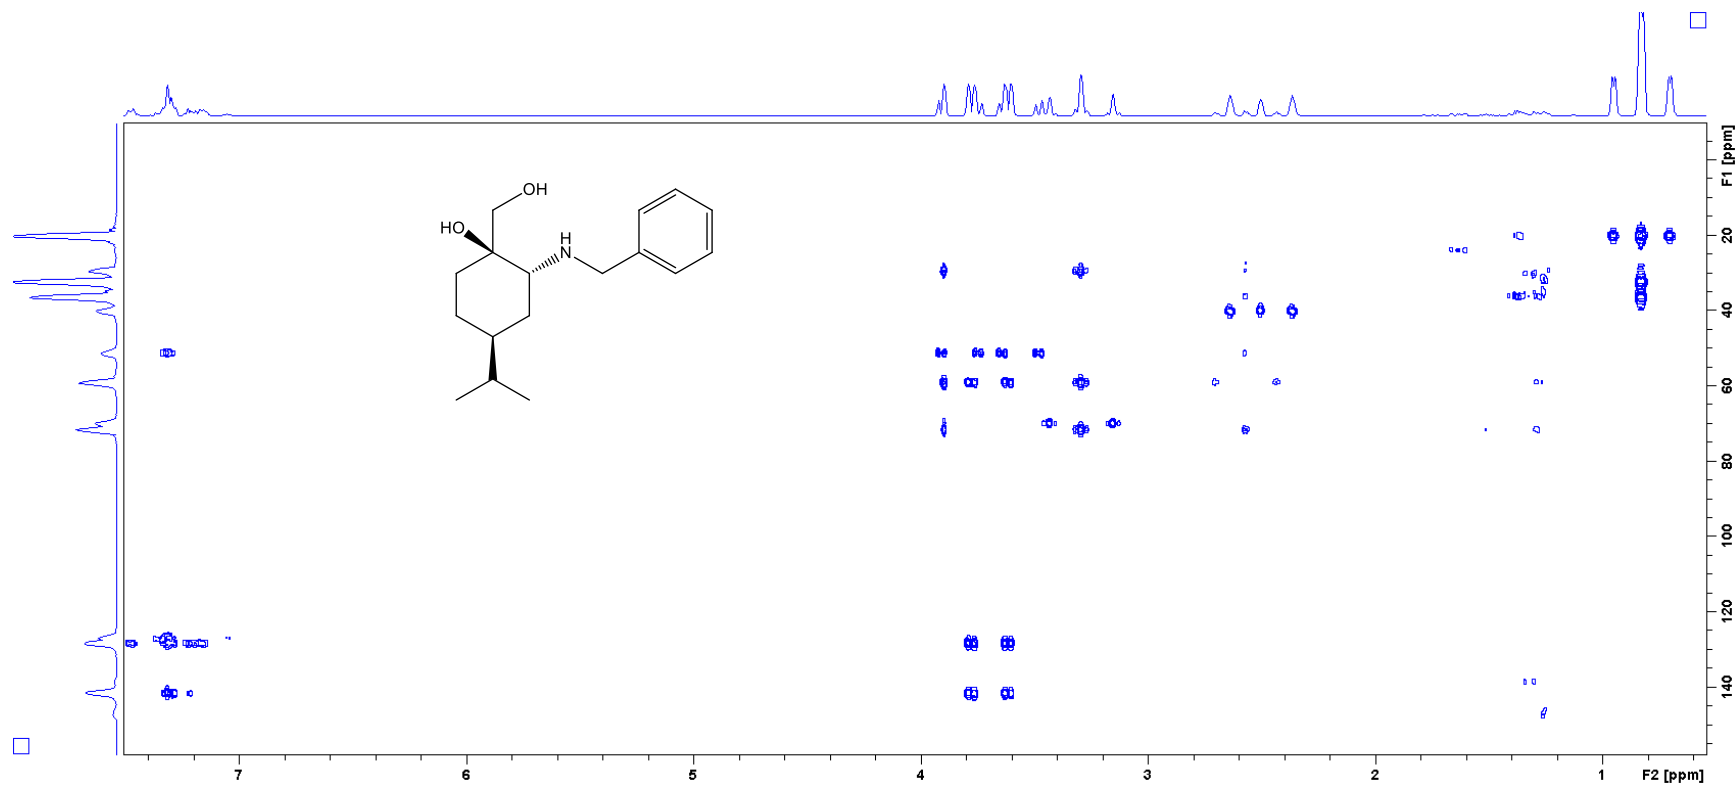



**Figure S 131:  $^1\text{H}$ -NMR of compound (1*S*,2*R*,4*S*)-1-(Hydroxymethyl)-4-isopropyl-2-(methylamino)cyclohexanol hydrochloride **22****

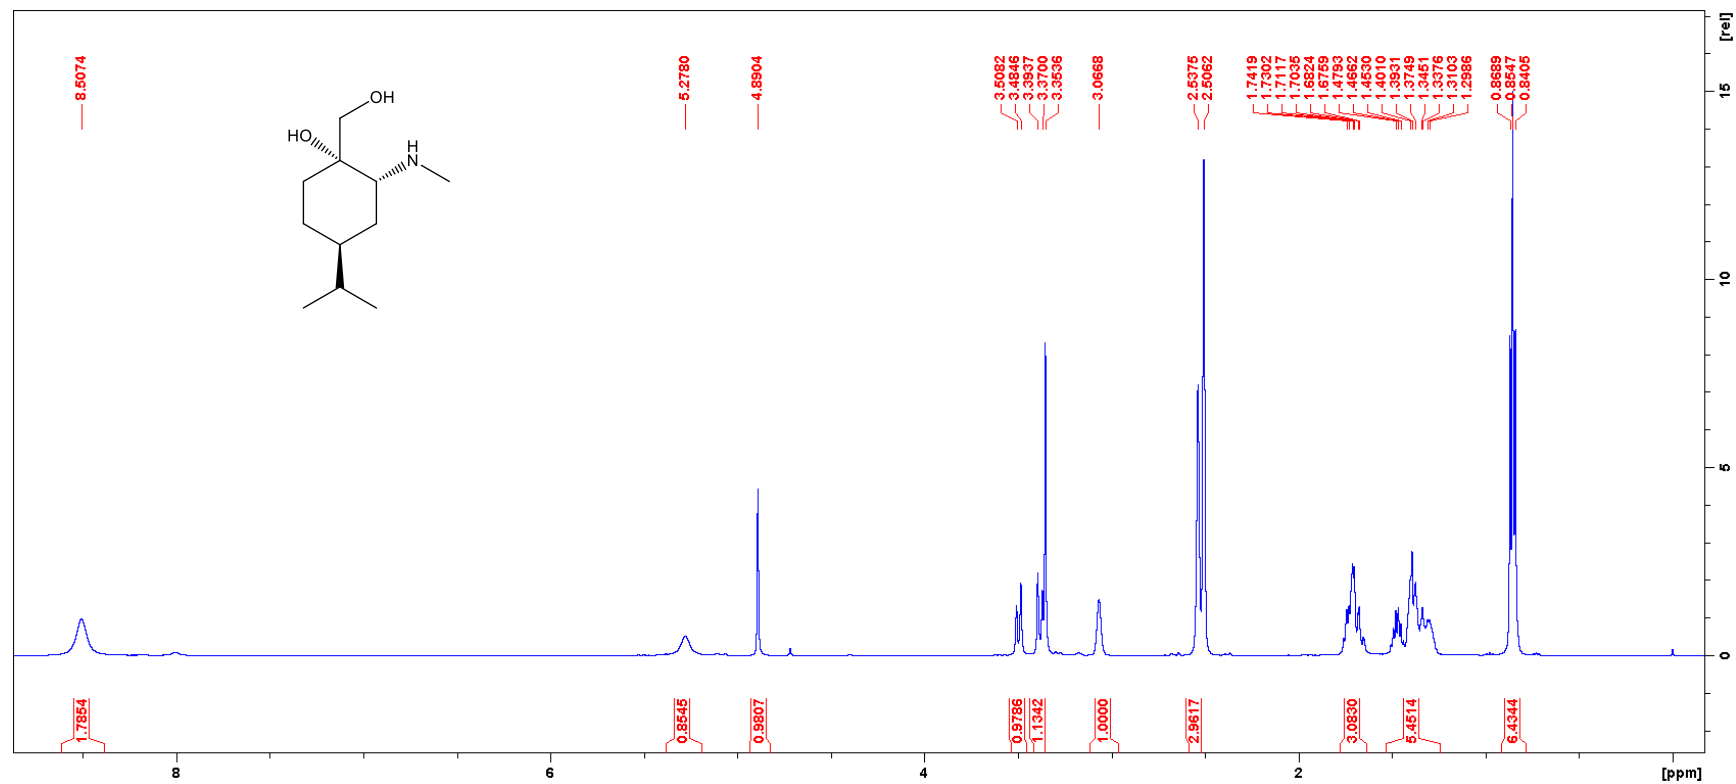

**Figure S 132:**  $^{13}\text{C}$ -NMR of compound (1*S*,2*R*,4*S*)-1-(Hydroxymethyl)-4-isopropyl-2-(methylamino)cyclohexanol hydrochloride **22**

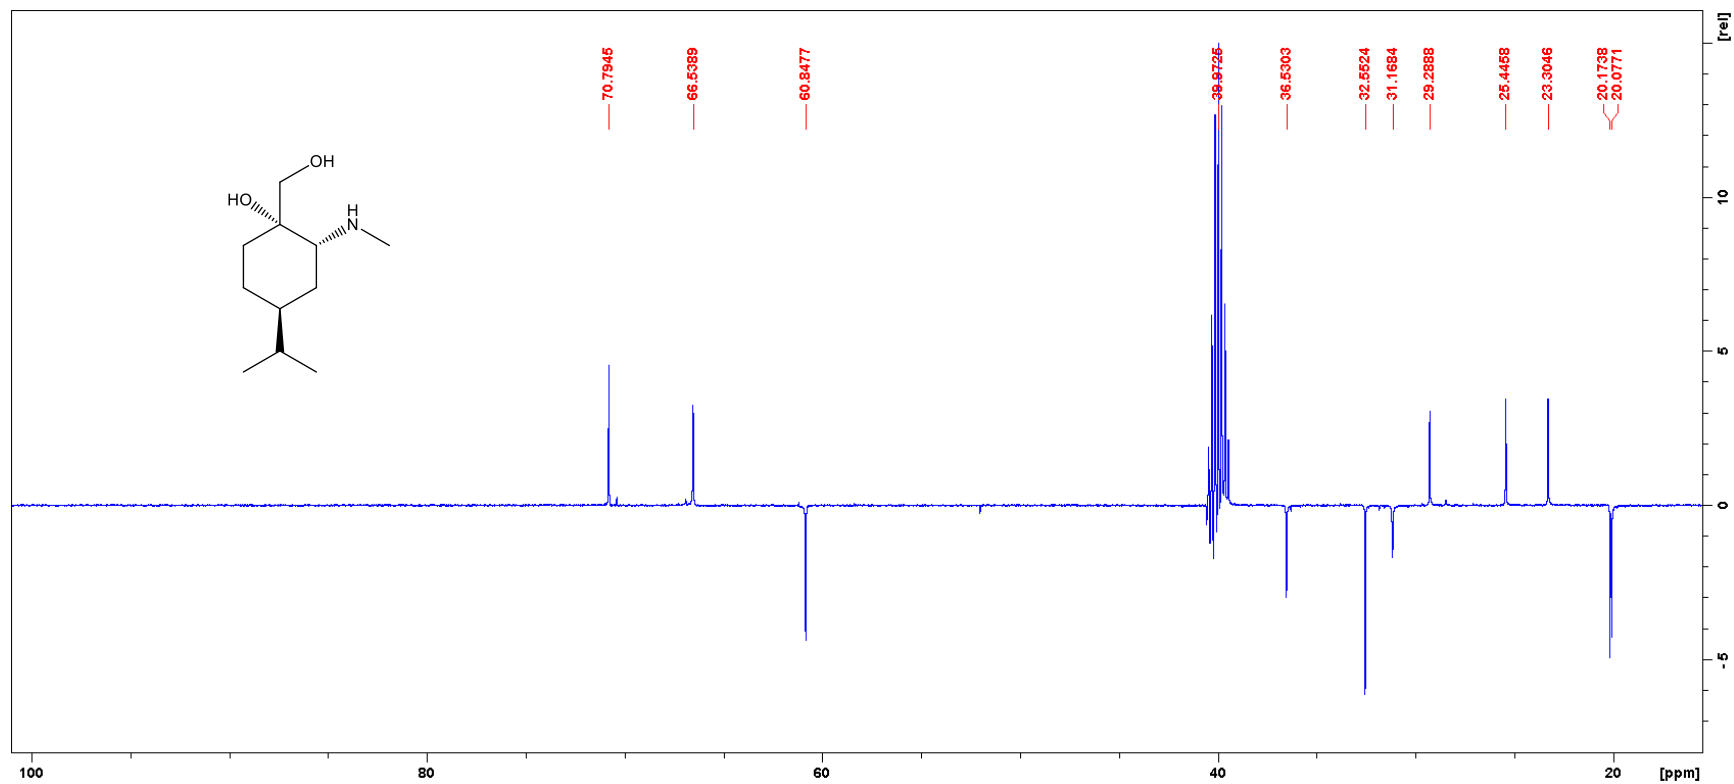

**Figure S 133: COSY NMR of compound (1S,2R,4S)-1-(Hydroxymethyl)-4-isopropyl-2-(methylamino)cyclohexanol hydrochloride **22****

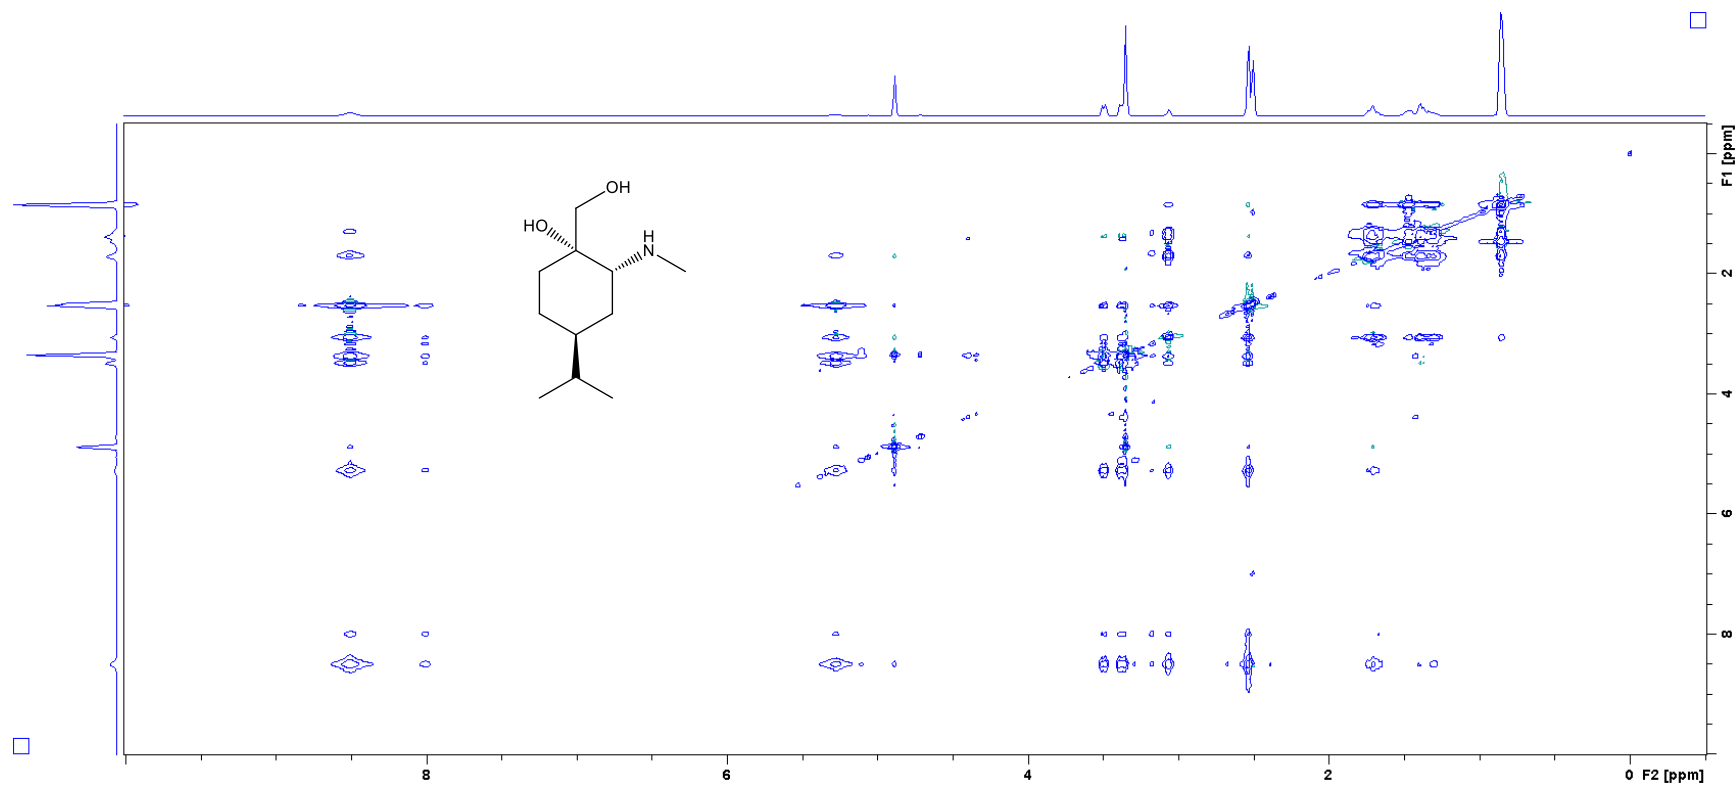

**Figure S 134: HSQC NMR of compound (1*S*,2*R*,4*S*)-1-(Hydroxymethyl)-4-isopropyl-2-(methylamino)cyclohexanol hydrochloride **22****

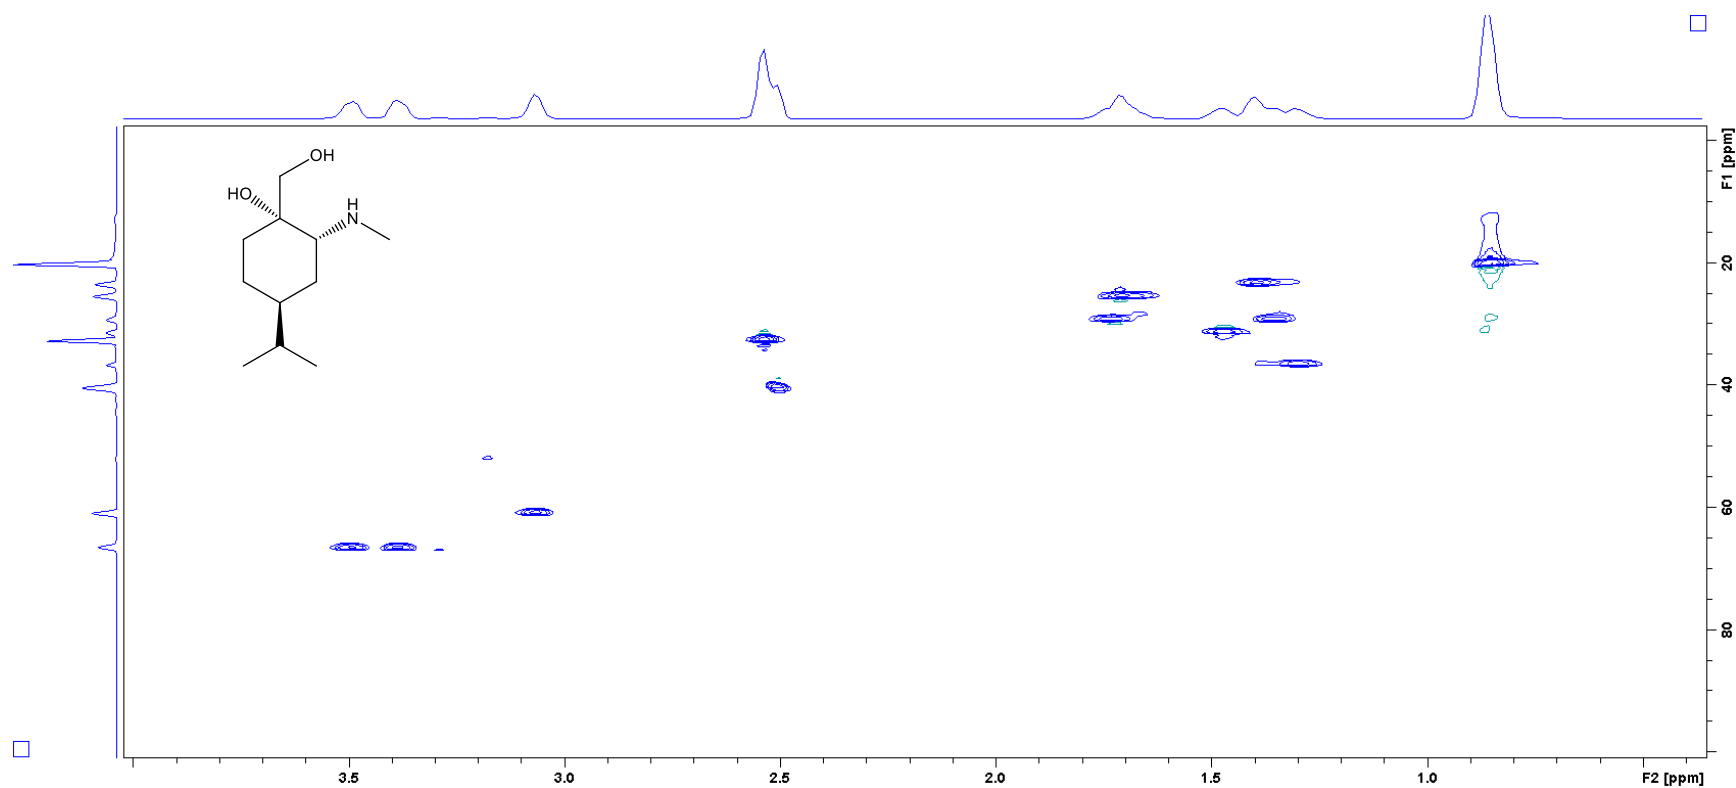

Figure S 135: <sup>1</sup>H-NMR of compound (4a*S*,7*S*,8a*R*)-1-Benzyl-7-isopropyloctahydro-1*H*-benzo[d][1,3]oxazine-4a-ol **25a**

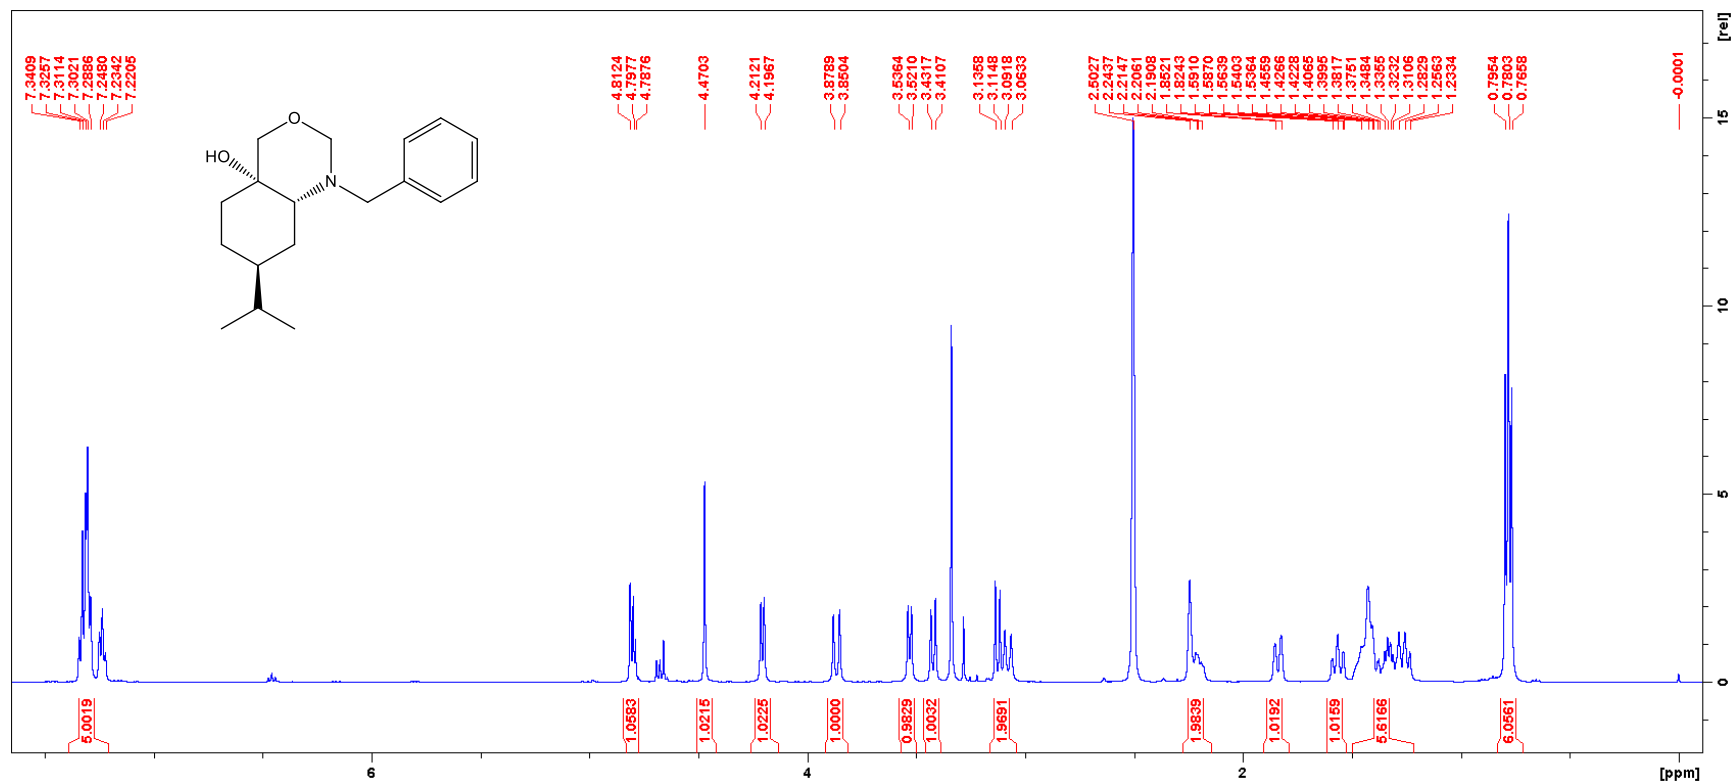

Figure S 136:  $^{13}\text{C}$ -NMR of compound (4a*S*,7*S*,8a*R*)-1-Benzyl-7-isopropyloctahydro-1*H*-benzo[d][1,3]oxazine-4a-ol **25a**

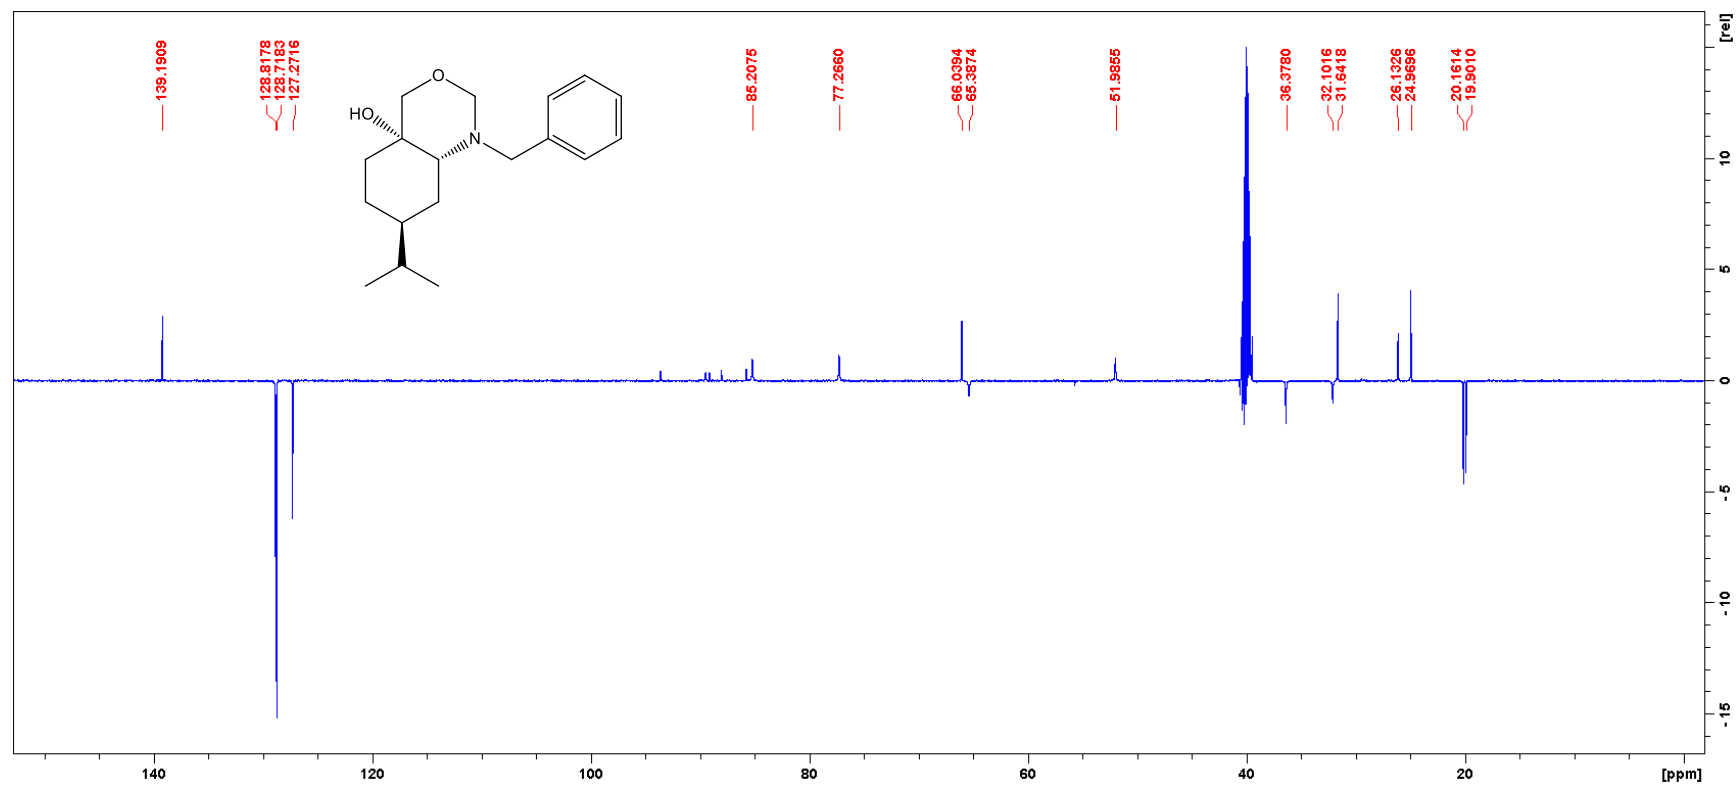

**Figure S 137: COSY NMR of compound (4a*S*,7*S*,8a*R*)-1-Benzyl-7-isopropyloctahydro-1*H*-benzo[d][1,3]oxazine-4a-ol **25a****

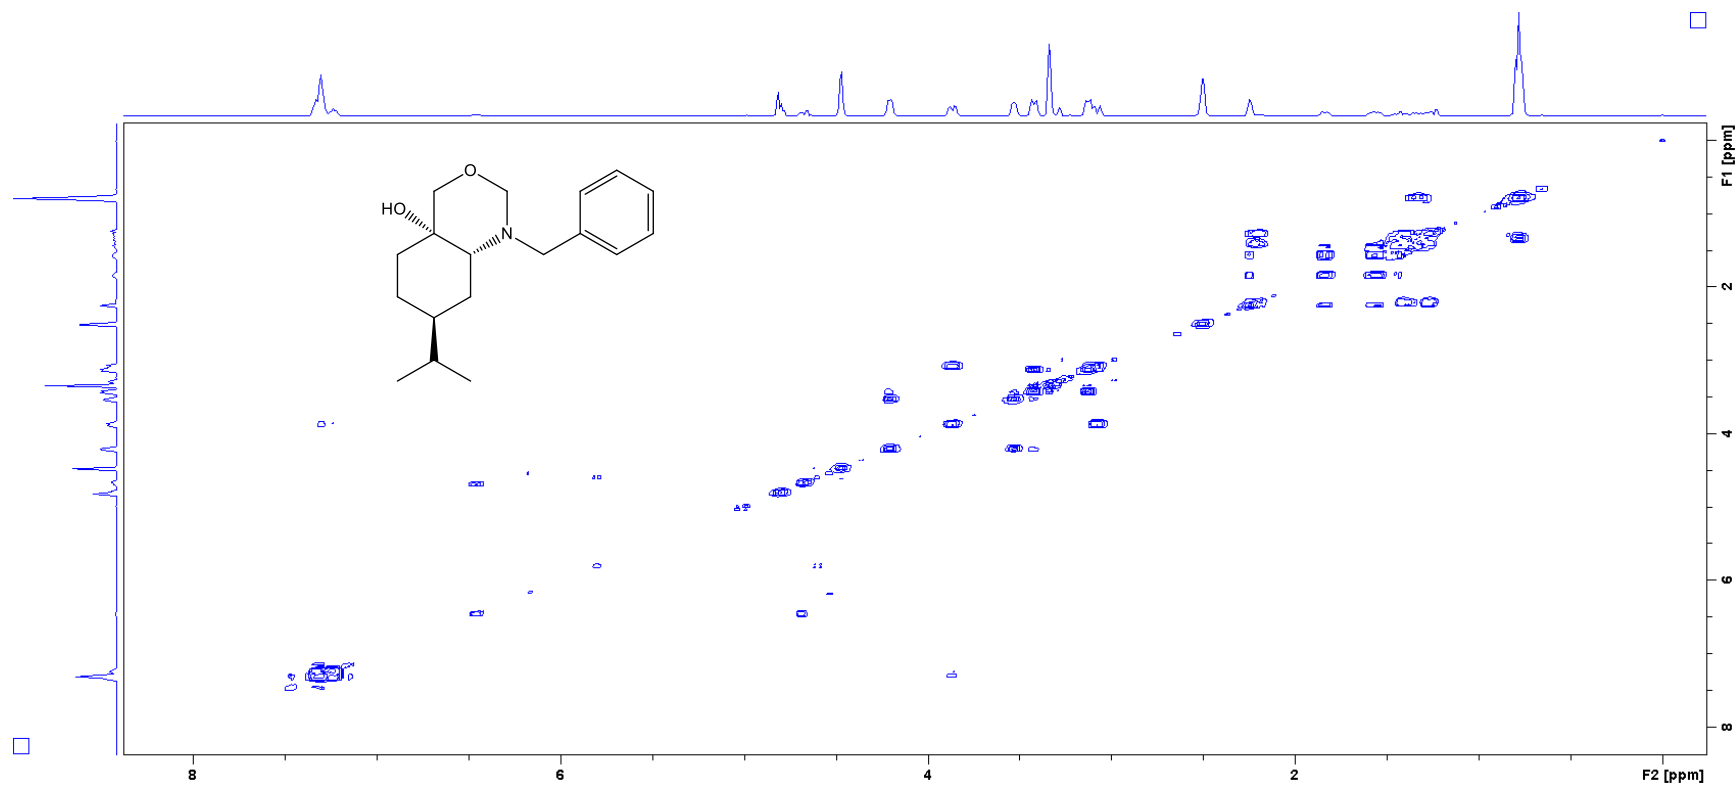

**Figure S 138: HSQC NMR of compound (4a*S*,7*S*,8a*R*)-1-Benzyl-7-isopropyloctahydro-1*H*-benzo[d][1,3]oxazine-4a-ol **25a****

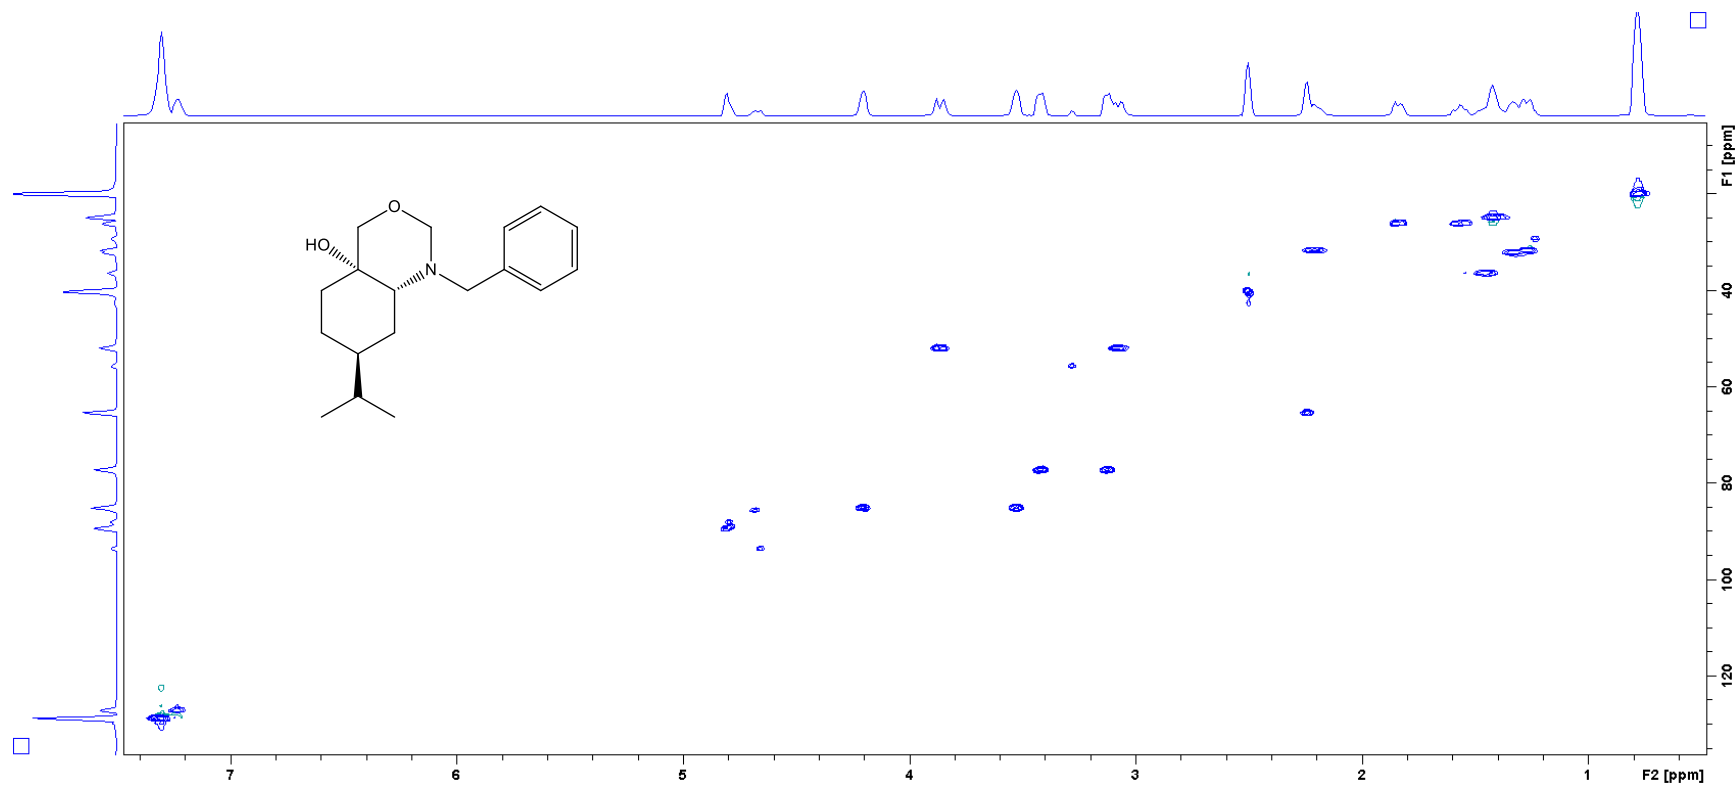



**Figure S 139:  $^1\text{H}$ -NMR of compound (4a*R*,7*S*,8a*R*)-1-Benzyl-7-isopropyloctahydro-1*H*-benzo[d][1,3]oxazine-4a-ol **25b****

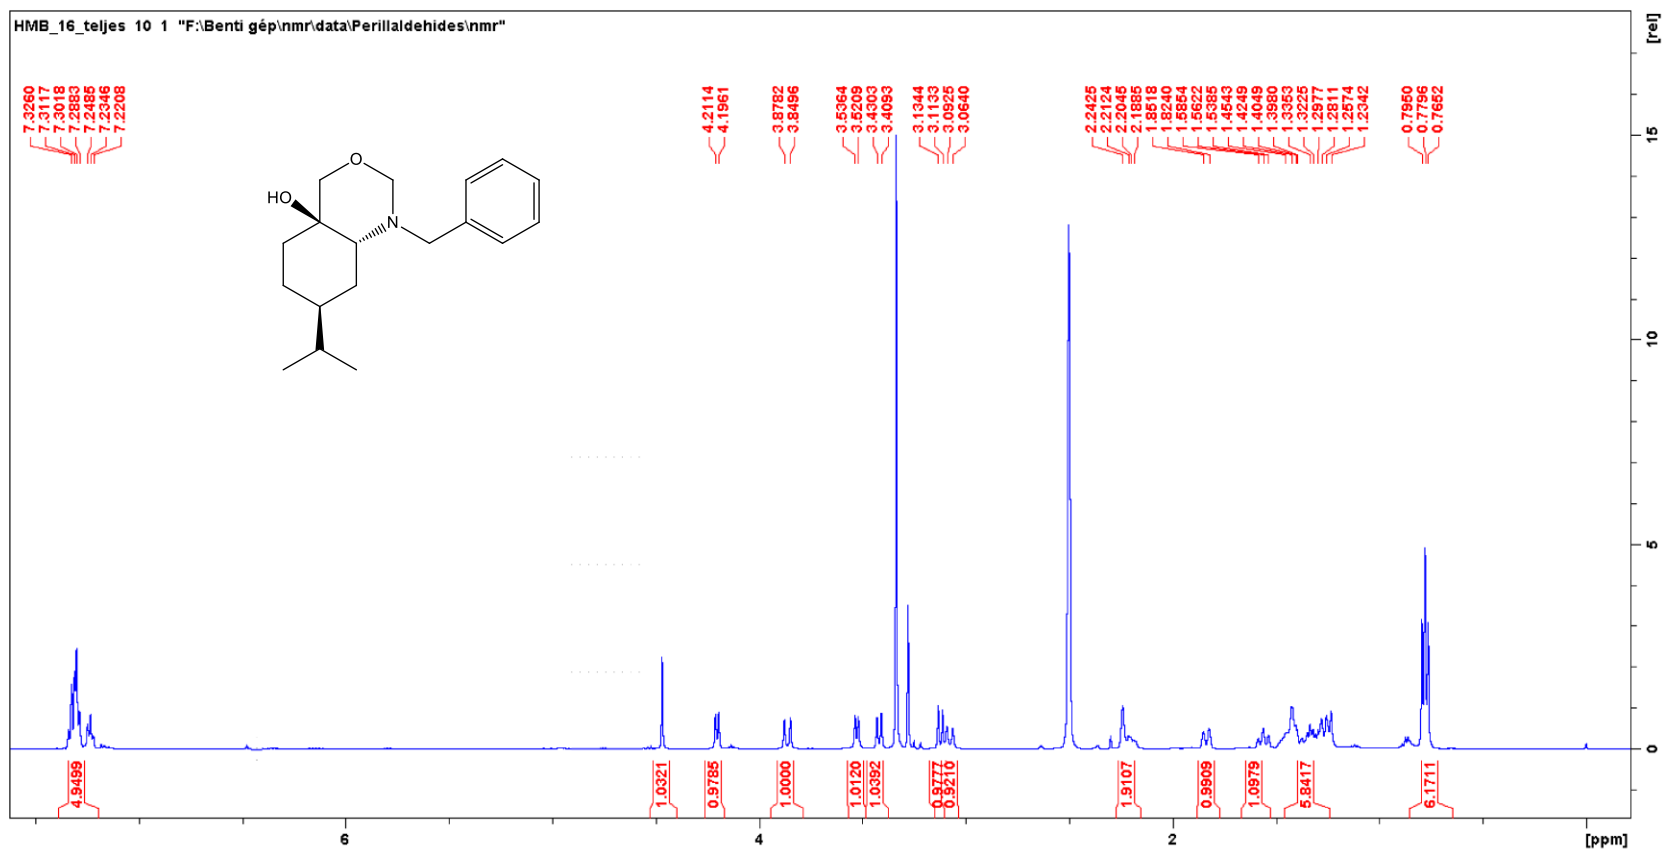

**Figure S 140:**  $^{13}\text{C}$ -NMR of compound (4*aR*,7*S*,8*aR*)-1-Benzyl-7-isopropyloctahydro-1*H*-benzo[d][1,3]oxazine-4*a*-ol **25b**

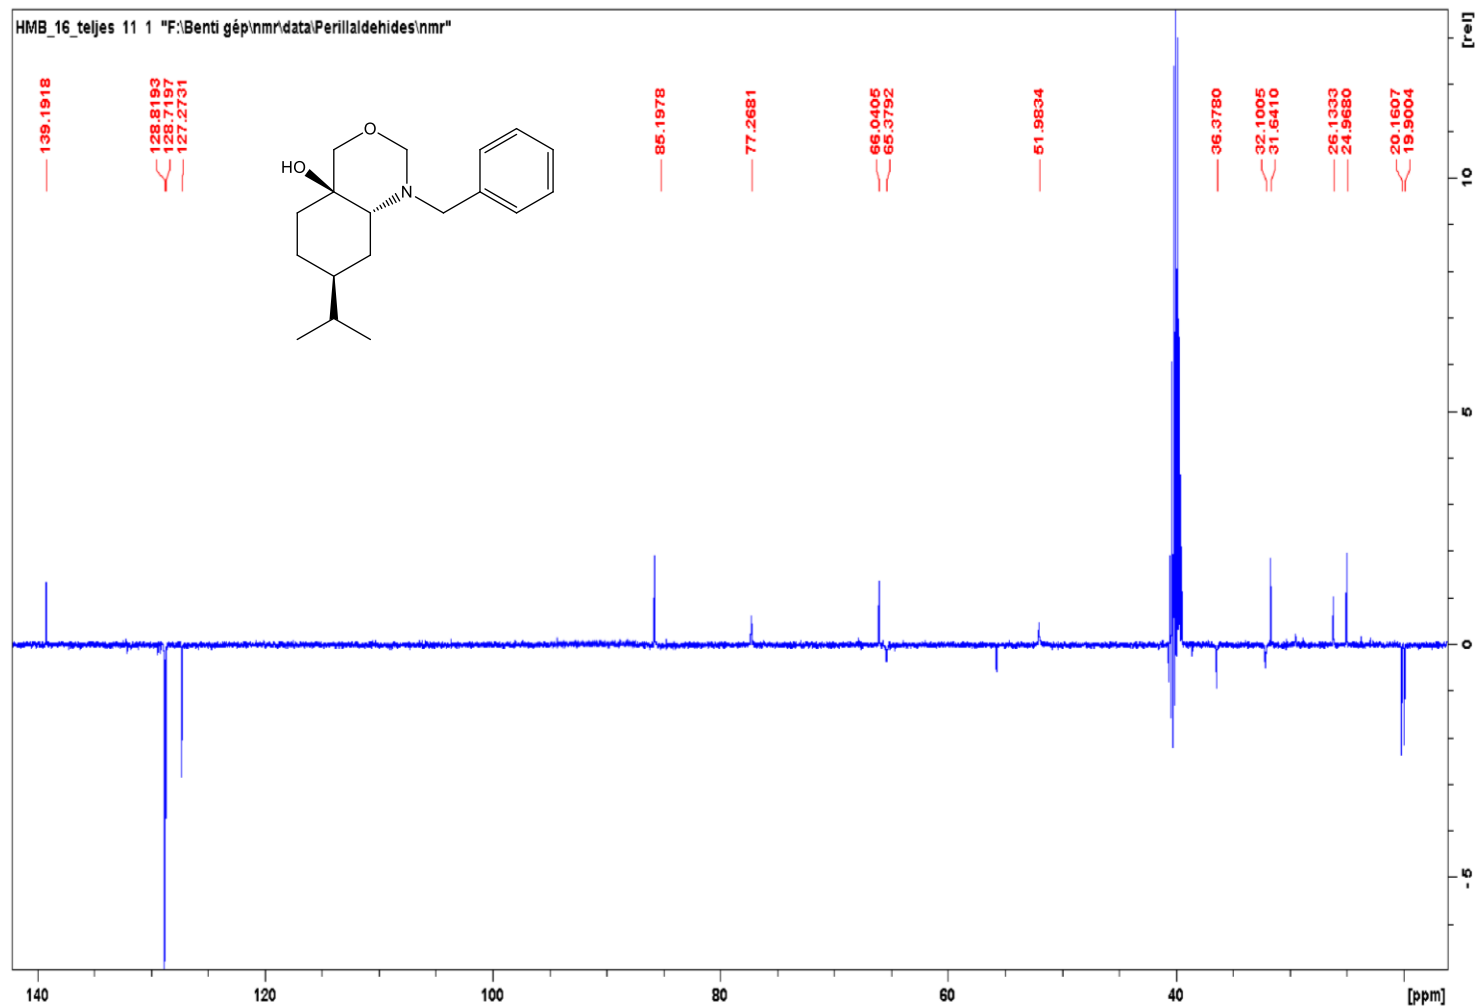

Figure S 141: <sup>1</sup>H-NMR of compound (4a*S*,7*S*,8a*R*)-7-isopropyl-1-methyloctahydro-1*H*-benzo[d][1,3]oxazine-4a-ol **24**

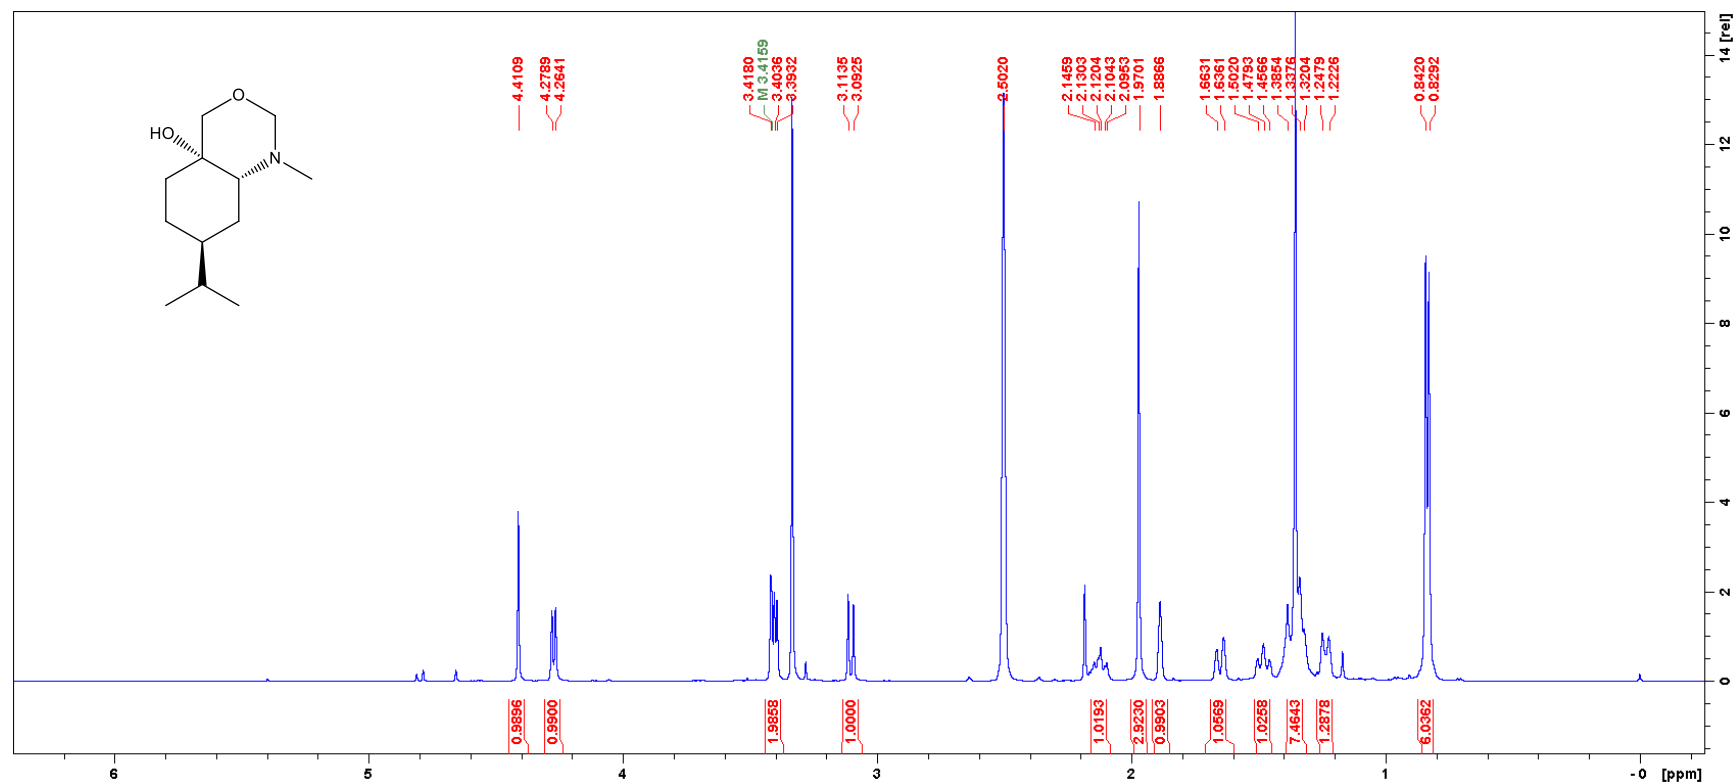

**Figure S 142:**  $^{13}\text{C}$ -NMR of compound (4a*S*,7*S*,8a*R*)-7-Isopropyl-1-methyloctahydro-1*H*-benzo[d][1,3]oxazine-4a-ol **24**

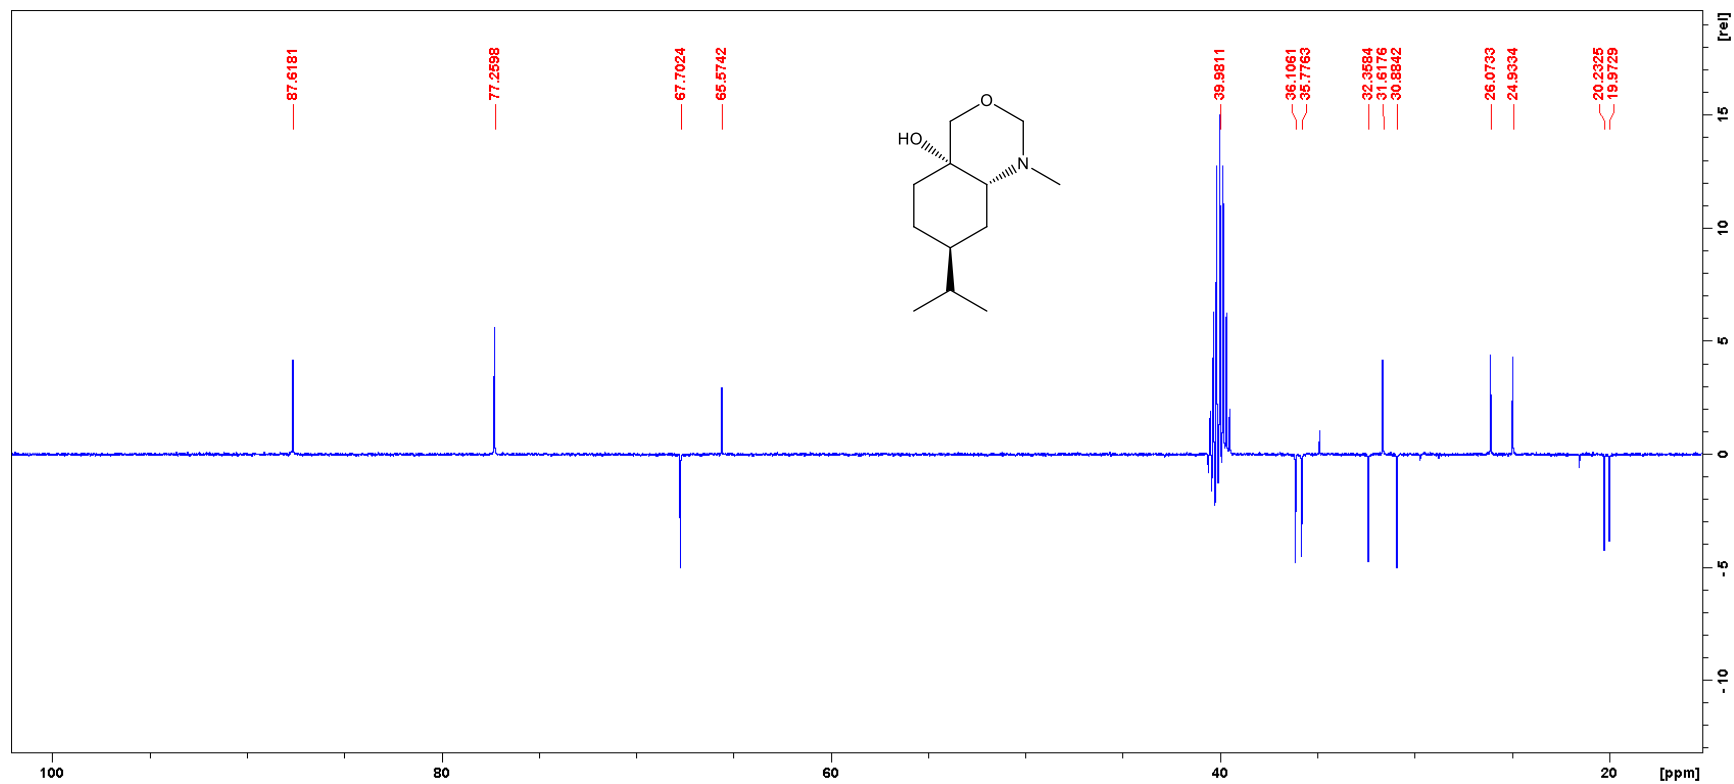

**Figure S 143: COSY NMR of compound (4a*S*,7*S*,8a*R*)-7-Isopropyl-1-methyloctahydro-1*H*-benzo[d][1,3]oxazine-4a-ol **24****

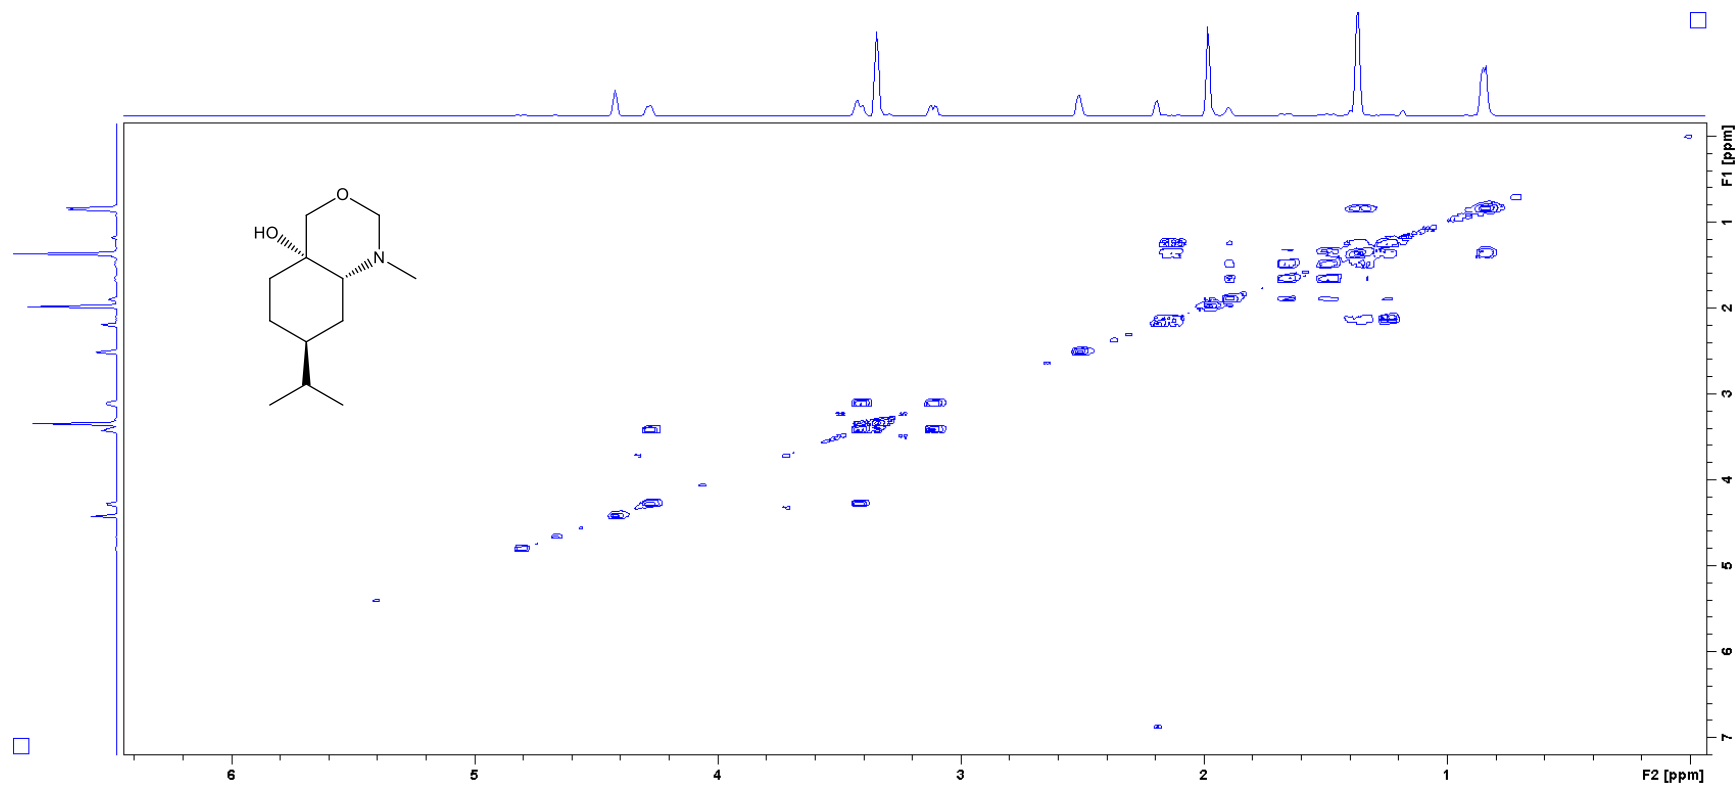

**Figure S 144: HSQC NMR of compound (4a*S*,7*S*,8a*R*)-7-Isopropyl-1-methyloctahydro-1*H*-benzo[d][1,3]oxazine-4a-ol **24****

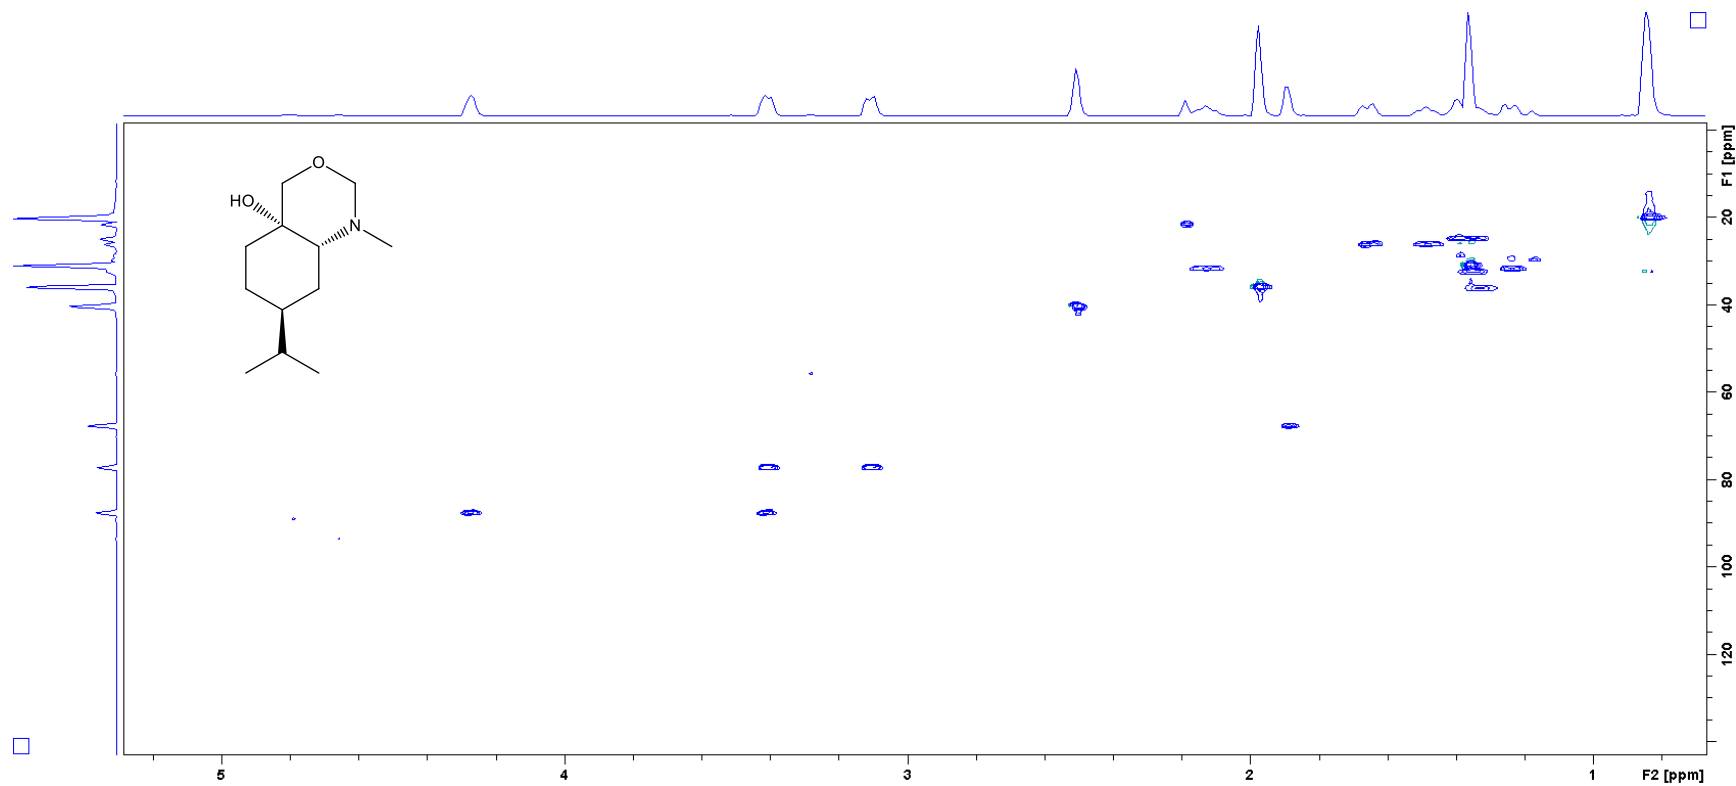

**Figure S 145: Chiral GC chromatogram of the mixture 16a and 16b**

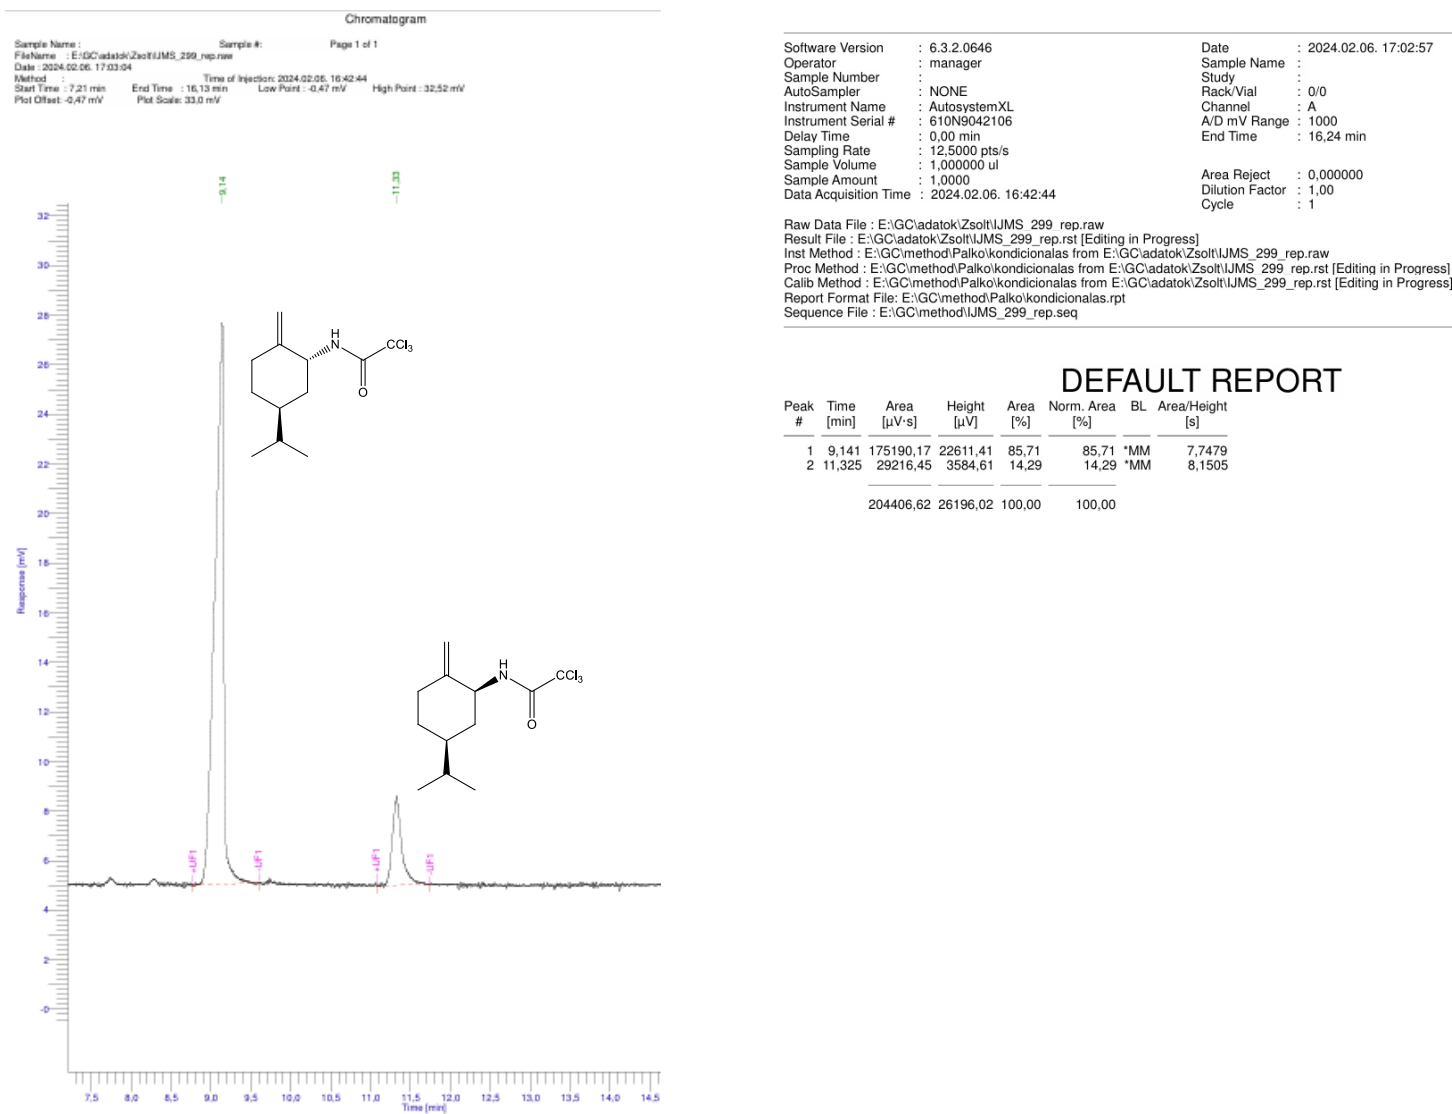

**Figure S 146: Chiral GC chromatogram of the mixture 18a and 18b**

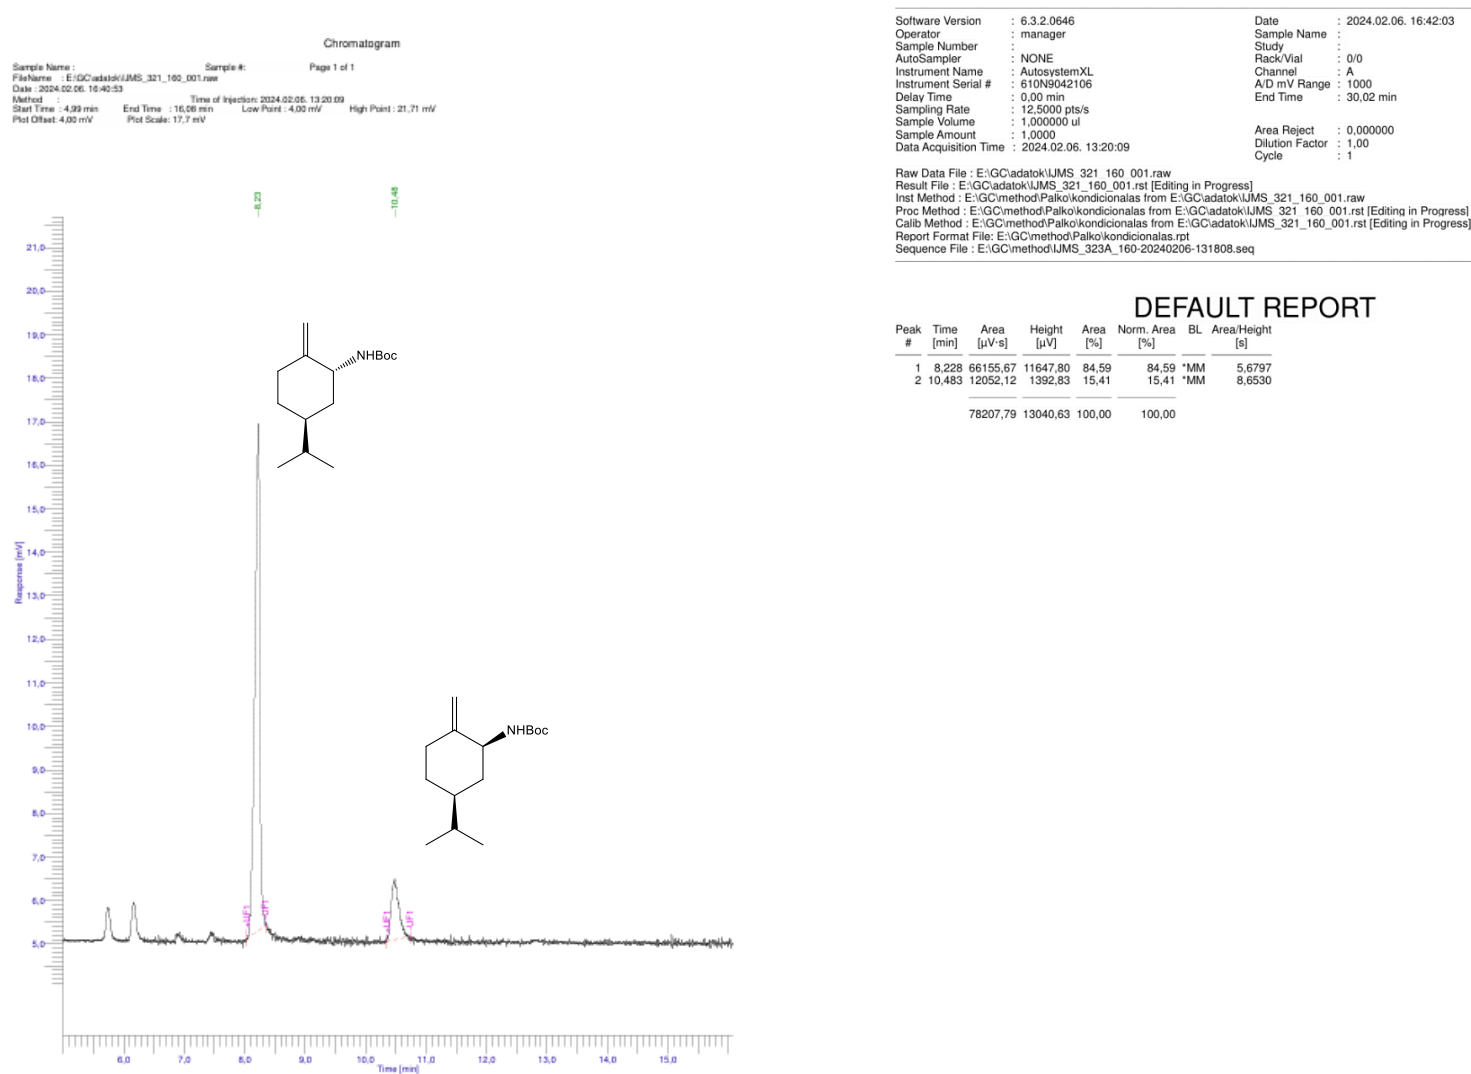



**Figure S 147: Chiral GC chromatogram of OAc 1-phenyl-1-propanol enantiomers**

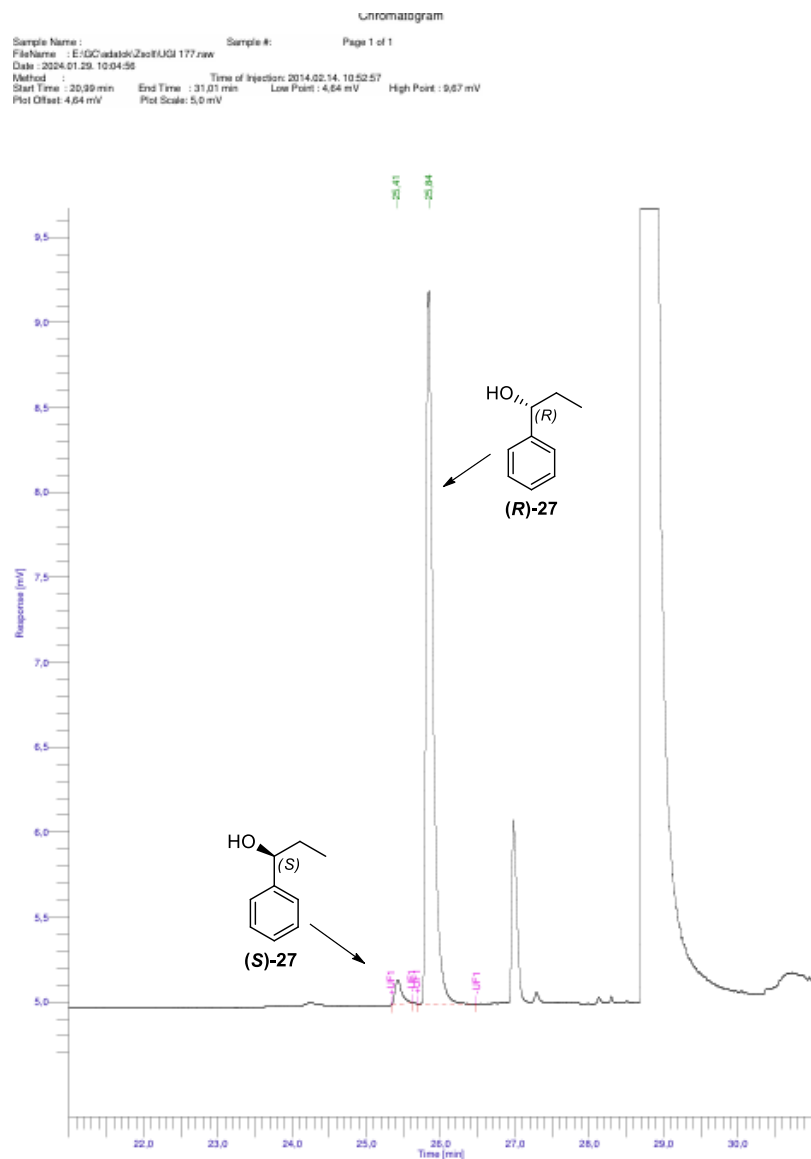

Software Version : 6.3.2.0646  
 Operator : manager  
 Sample Number :  
 AutoSampler : NONE  
 Instrument Name : PerkinName  
 Instrument Serial # : 610N9042106  
 Delay Time : 0.00 min  
 Sampling Rate : 12,5000 pts/s  
 Sample Volume : 1,000000 ul  
 Sample Amount : 1,00000  
 Data Acquisition Time : 2014.02.14. 10:52:57

Date : 2024.01.29. 10:07:10  
 Sample Name :  
 Study :  
 Rack/Vial : 0/0  
 Channel : A  
 A/D mV Range : 1000  
 End Time : 42,00 min

Area Reject : 0,000000  
 Dilution Factor : 1,00  
 Cycle : 1

Raw Data File : E:\GC\adatok\Zsolt\UGI 177.raw  
 Result File : E:\GC\adatok\Zsolt\UGI 177.rst [Editing in Progress]  
 Inst Method : D:\Doksik\Irodalom\GC\method\Zsolt\fenipropanol90 from E:\GC\adatok\Zsolt\UGI 177.raw  
 Proc Method : D:\Doksik\Irodalom\GC\method\Zsolt\fenipropanol90 from E:\GC\adatok\Zsolt\UGI 177.rst [Editing in Progress]  
 Calib Method : D:\Doksik\Irodalom\GC\method\Zsolt\fenipropanol90 from E:\GC\adatok\Zsolt\UGI 177.rst [Editing in Progress]  
 Report Format File : D:\Doksik\Irodalom\GC\method\Zsolt\fenipropanol90.rpt  
 Sequence File : D:\Doksik\Irodalom\GC\adatok\UGI 177.seq

## DEFAULT REPORT

| Peak # | Time [min] | Area [μV·s] | Height [μV] | Area [%] | Norm. Area [%] | BL  | Area/Height [s] |
|--------|------------|-------------|-------------|----------|----------------|-----|-----------------|
| 1      | 25,415     | 883,78      | 141,53      | 3,06     | 3,06           | *MM | 6,2443          |
| 2      | 25,844     | 27991,38    | 4198,54     | 96,94    | 96,94          | *MM | 6,6669          |
|        |            | 28875,16    | 4340,08     | 100,00   | 100,00         |     |                 |

Catalyst: 10a

**Figure S 148: Chiral GC chromatogram of OAc 1-phenyl-1-propanol enantiomers**

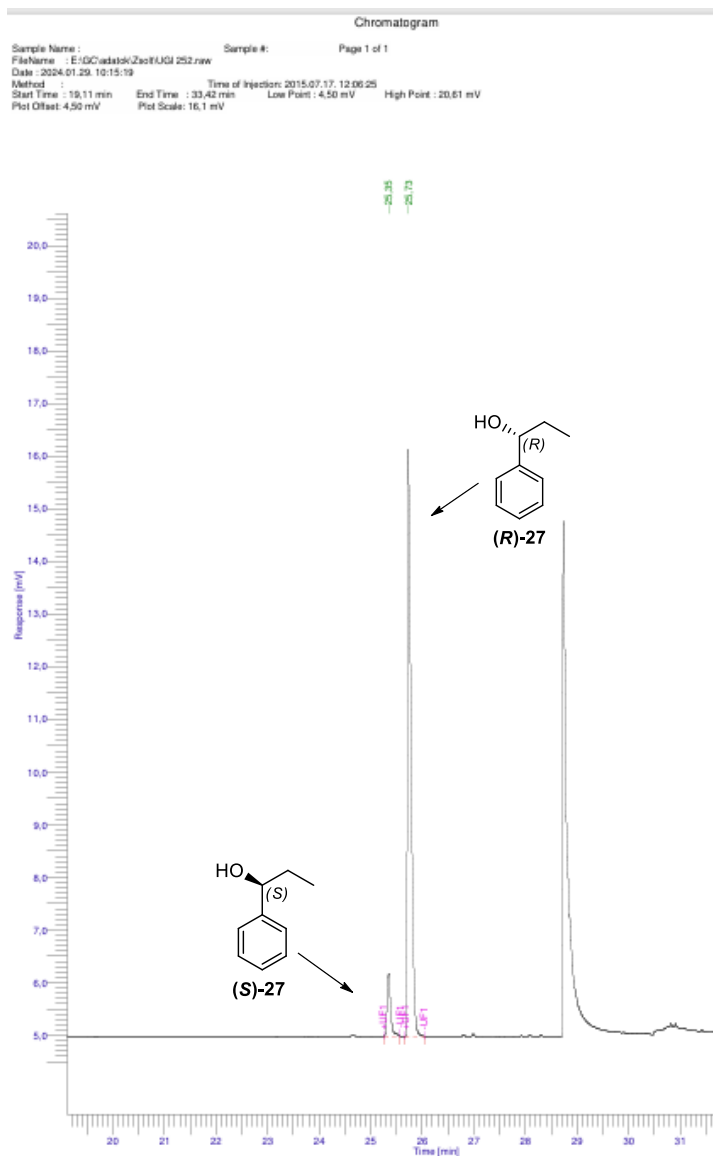

|                                              |                             |
|----------------------------------------------|-----------------------------|
| Software Version : 6.3.2.0646                | Date : 2024.01.29. 10:14:37 |
| Operator : manager                           | Sample Name :               |
| Sample Number :                              | Study :                     |
| AutoSampler : NONE                           | Rack/Vial : 0/0             |
| Instrument Name : PerkinName                 | Channel : A                 |
| Instrument Serial # : 610N9042106            | A/D mV Range : 1000         |
| Delay Time : 0,00 min                        | End Time : 42,00 min        |
| Sampling Rate : 12,5000 pts/s                |                             |
| Sample Volume : 1,000000 ul                  | Area Reject : 0,000000      |
| Sample Amount : 1,0000                       | Dilution Factor : 1,00      |
| Data Acquisition Time : 2015.07.17. 12:06:25 | Cycle : 1                   |

Raw Data File : E:\GC\adatok\Zsolt\UGI 252.raw  
 Result File : E:\GC\adatok\Zsolt\UGI 252.rst [Editing in Progress]  
 Inst Method : D:\Doksik\Irodalom\GC\method\Zsolt\fenipropanol90 from E:\GC\adatok\Zsolt\UGI 252.raw  
 Proc Method : D:\Doksik\Irodalom\GC\method\Zsolt\fenipropanol90 from E:\GC\adatok\Zsolt\UGI 252.rst [Editing  
 Calib Method : D:\Doksik\Irodalom\GC\method\Zsolt\fenipropanol90 from E:\GC\adatok\Zsolt\UGI 252.rst [Editing  
 Report Format File: D:\Doksik\Irodalom\GC\method\Zsolt\fenipropanol90.rpt  
 Sequence File : D:\Doksik\Irodalom\GC\adatok\UGI 252.seq

## DEFAULT REPORT

| Peak # | Time [min] | Area [μV·s] | Height [μV] | Area [%] | Norm. Area [%] | BL  | Area/Height [s] |
|--------|------------|-------------|-------------|----------|----------------|-----|-----------------|
| 1      | 25,349     | 5672,12     | 1197,12     | 9,58     | 9,58           | *MM | 4,7381          |
| 2      | 25,731     | 53560,85    | 11156,51    | 90,42    | 90,42          | *MM | 4,8009          |
|        |            | 59232,97    | 12353,63    | 100,00   | 100,00         |     |                 |

Catalyst: **10b**

**Figure S 149: Chiral GC chromatogram of OAc 1-phenyl-1-propanol enantiomers**

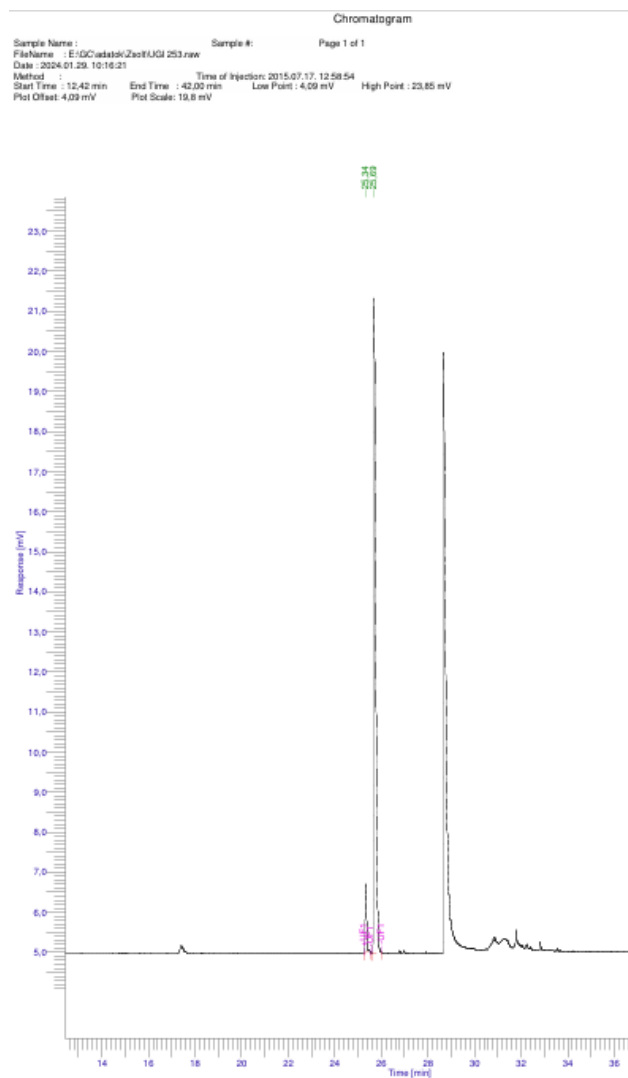

Software Version : 6.3.2.0646  
 Operator : manager  
 Sample Number :  
 AutoSampler : NONE  
 Instrument Name : PerkinName  
 Instrument Serial # : 610N9042106  
 Delay Time : 0,00 min  
 Sampling Rate : 12,5000 pts/s  
 Sample Volume : 1,000000 ul  
 Sample Amount : 1,0000  
 Data Acquisition Time : 2015.07.17. 12:58:54

Date : 2024.01.29. 10:16:54  
 Sample Name :  
 Study :  
 Rack/Vial : 0/0  
 Channel : A  
 A/D mV Range : 1000  
 End Time : 42,00 min

Area Reject : 0,000000  
 Dilution Factor : 1,00  
 Cycle : 1

Raw Data File : E:\GC\adatok\Zsolt\UGI 253.raw  
 Result File : E:\GC\adatok\Zsolt\UGI 253.rst [Editing in Progress]  
 Inst Method : D:\Doksik\Irodalom\GC\method\Zsolt\fenipropanol90 from E:\GC\adatok\Zsolt\UGI 253.raw  
 Proc Method : D:\Doksik\Irodalom\GC\method\Zsolt\fenipropanol90 from E:\GC\adatok\Zsolt\UGI 253.rst [Editing i  
 Calib Method : D:\Doksik\Irodalom\GC\method\Zsolt\fenipropanol90 from E:\GC\adatok\Zsolt\UGI 253.rst [Editing  
 Report Format File: D:\Doksik\Irodalom\GC\method\Zsolt\fenipropanol90.rpt  
 Sequence File : D:\Doksik\Irodalom\GC\adatok\UGI 253.seq

## DEFAULT REPORT

| Peak # | Time [min] | Area [μV·s] | Height [μV] | Area [%] | Norm. Area [%] | BL  | Area/Height [s] |
|--------|------------|-------------|-------------|----------|----------------|-----|-----------------|
| 1      | 25,340     | 7465,87     | 1709,15     | 6,85     | 6,85           | *MM | 4,3682          |
| 2      | 25,692     | 101501,55   | 16338,34    | 93,15    | 93,15          | *MM | 6,2125          |
|        |            | 108967,41   | 18047,49    | 100,00   | 100,00         |     |                 |

Missing Component Report

Catalyst: 10c

**Figure S 150: Chiral GC chromatogram of OAc 1-phenyl-1-propanol enantiomers**

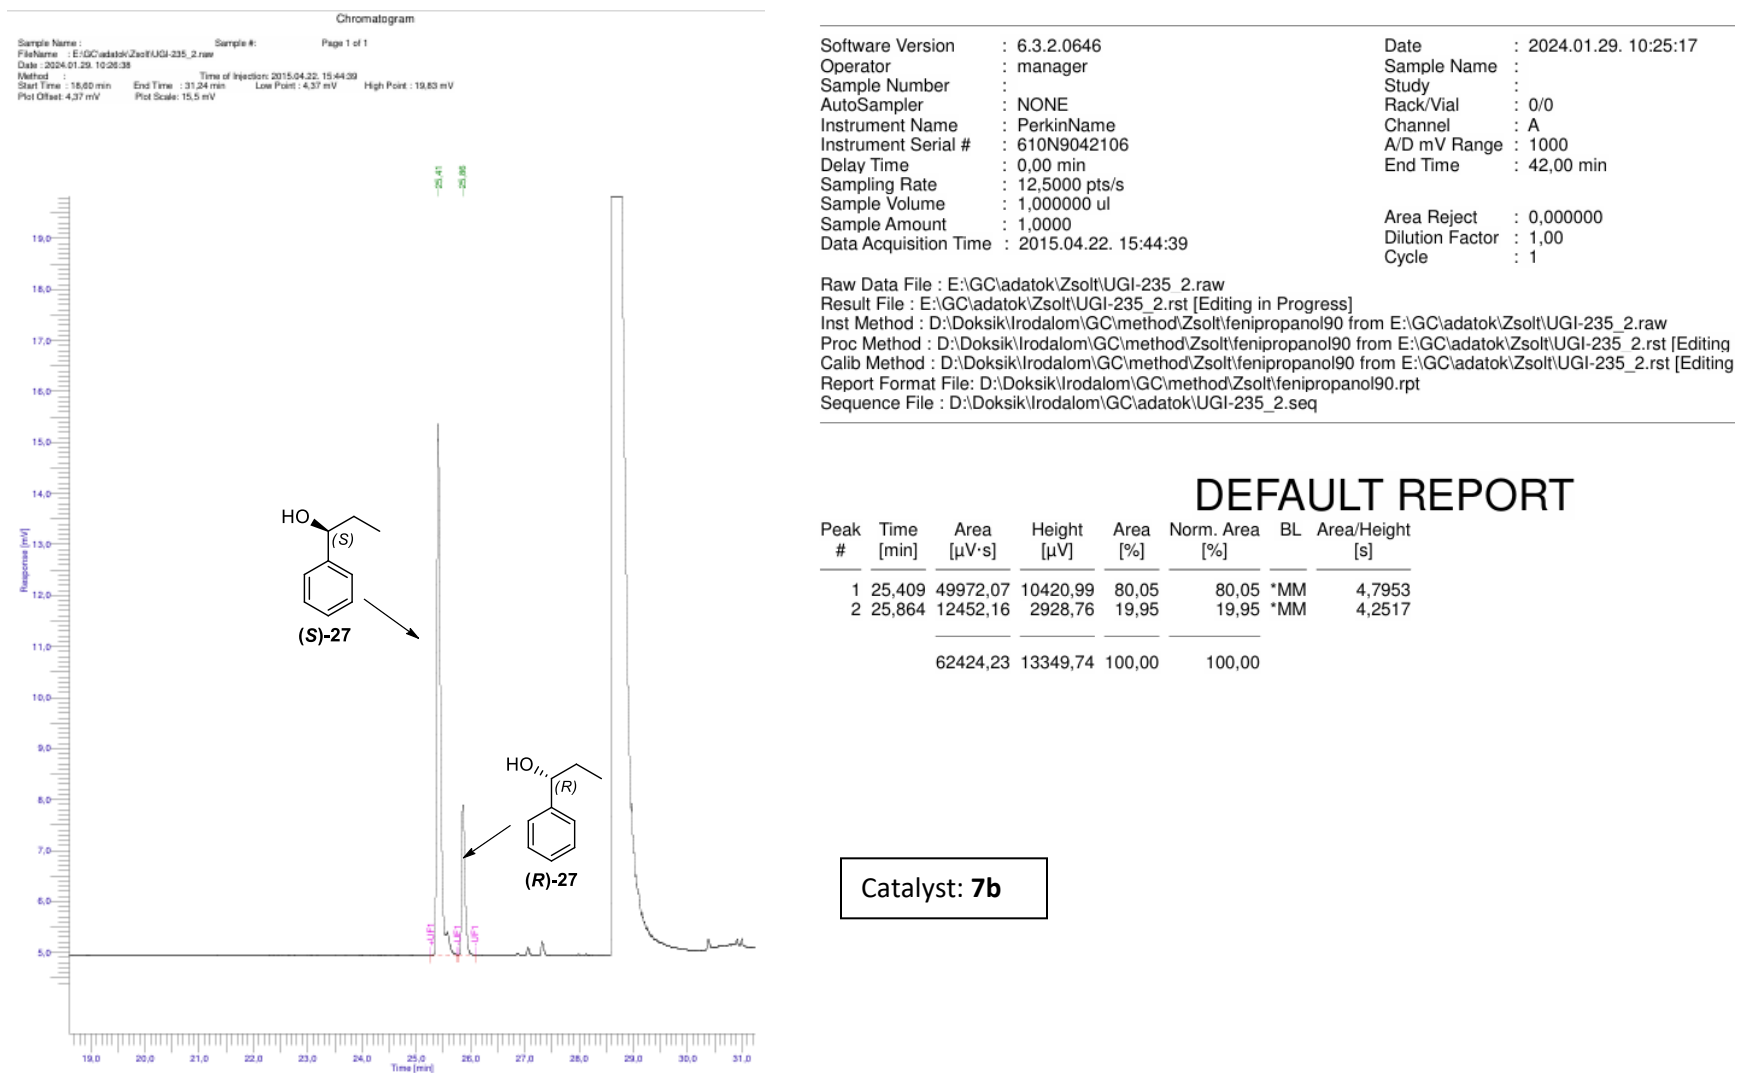

**Figure S 151: Chiral GC chromatogram of OAc 1-phenyl-1-propanol enantiomers**

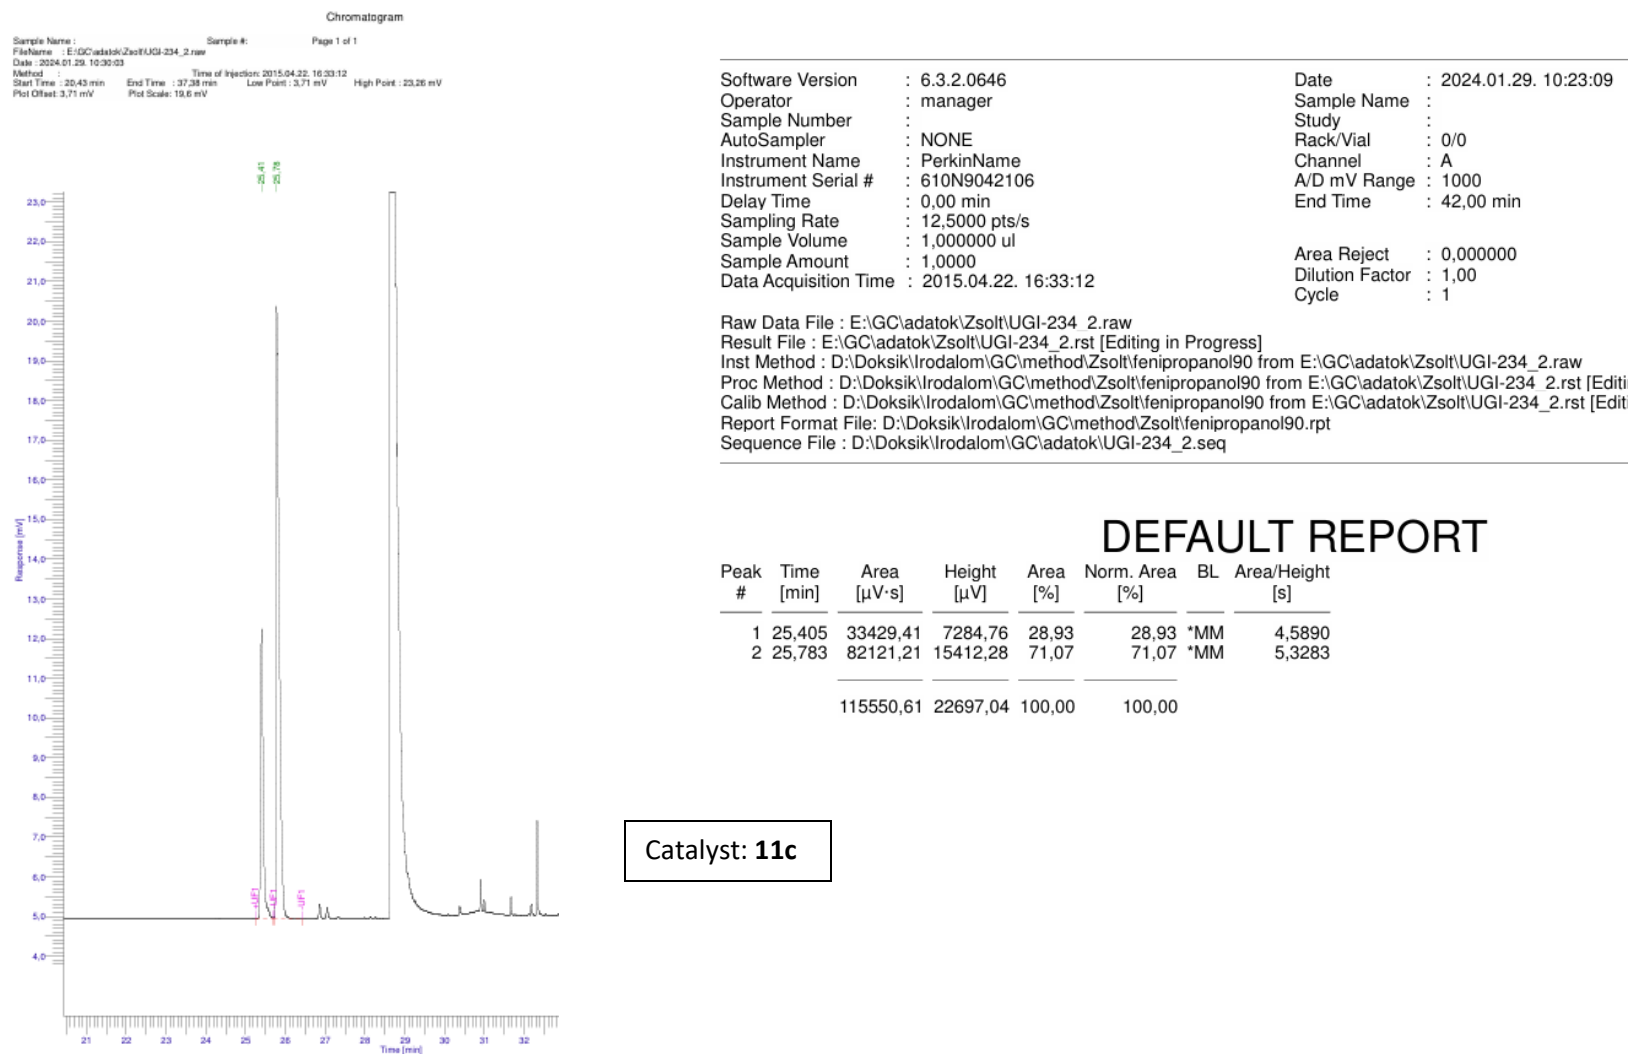

**Figure S 152: Chiral GC chromatogram of OAc 1-phenyl-1-propanol enantiomers**

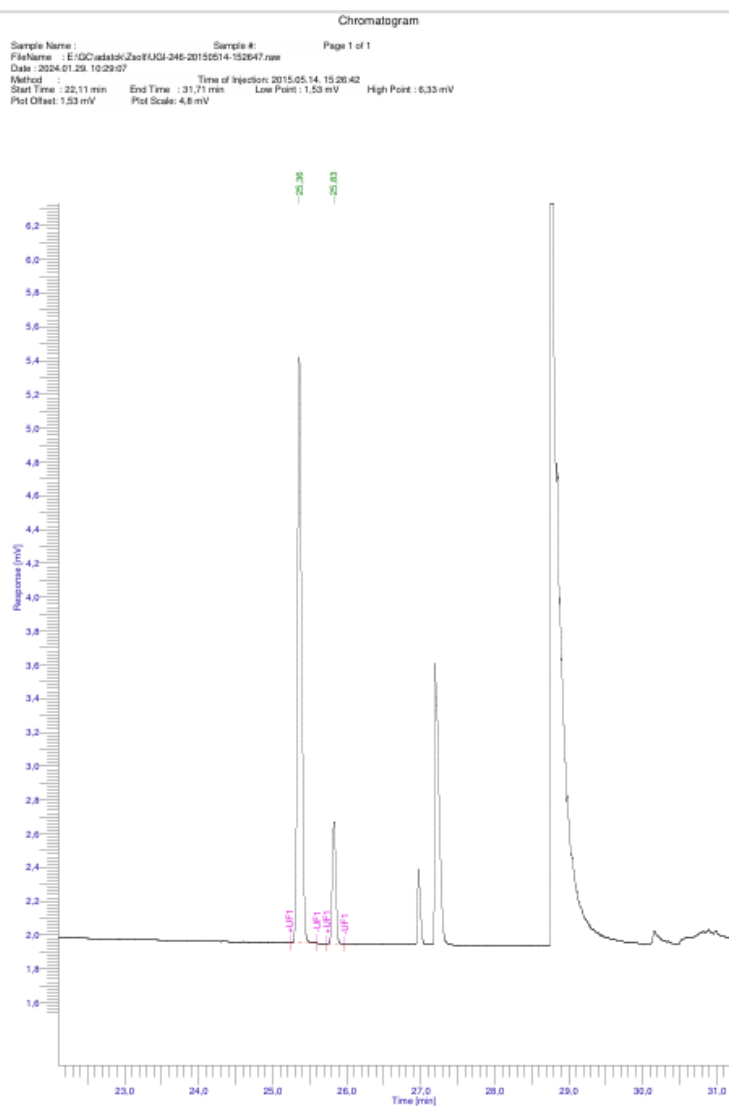

Software Version : 6.3.2.0646 Date : 2024.01.29. 10:18:58  
 Operator : manager Sample Name :  
 Sample Number : Study :  
 AutoSampler : NONE Rack/Vial : 0/0  
 Instrument Name : PerkinName Channel : A  
 Instrument Serial # : None A/D mV Range : 1000  
 Delay Time : 0.00 min End Time : 42.00 min  
 Sampling Rate : 12,5000 pts/s  
 Sample Volume : 1,000000 ul  
 Sample Amount : 1,0000  
 Data Acquisition Time : 2015.05.14. 15:26:42  
 Area Reject : 0,000000  
 Dilution Factor : 1,00  
 Cycle : 1

Raw Data File : E:\GC\adatok\Zsolt\UGI-246-20150514-152647.raw  
 Result File : E:\GC\adatok\Zsolt\UGI-246.rst [Editing in Progress]  
 Inst Method : D:\Doksik\Irodalom\GC\method\Zsolt\fenipropanol90 from E:\GC\adatok\Zsolt\UGI-246-20150514-1!  
 Proc Method : D:\Doksik\Irodalom\GC\method\Zsolt\fenipropanol90 from E:\GC\adatok\Zsolt\UGI-246.rst [Editing  
 Calib Method : D:\Doksik\Irodalom\GC\method\Zsolt\fenipropanol90 from E:\GC\adatok\Zsolt\UGI-246.rst [Editing  
 Report Format File : D:\Doksik\Irodalom\GC\method\Zsolt\fenipropanol90.rpt  
 Sequence File : D:\Doksik\Irodalom\GC\adatok\UGI-246.seq

## DEFAULT REPORT

| Peak # | Time [min] | Area [μV·s] | Height [μV] | Area [%] | Norm. Area [%] | BL  | Area/Height [s] |
|--------|------------|-------------|-------------|----------|----------------|-----|-----------------|
| 1      | 25,359     | 13654,62    | 3468,80     | 85,16    | 85,16          | *MM | 3,9364          |
| 2      | 25,828     | 2380,09     | 722,38      | 14,84    | 14,84          | *MM | 3,2948          |
|        |            | 16034,71    | 4191,17     | 100,00   | 100,00         |     |                 |

Catalyst: 8

**Figure S 153: Chiral GC chromatogram of OAc 1-phenyl-1-propanol enantiomers**

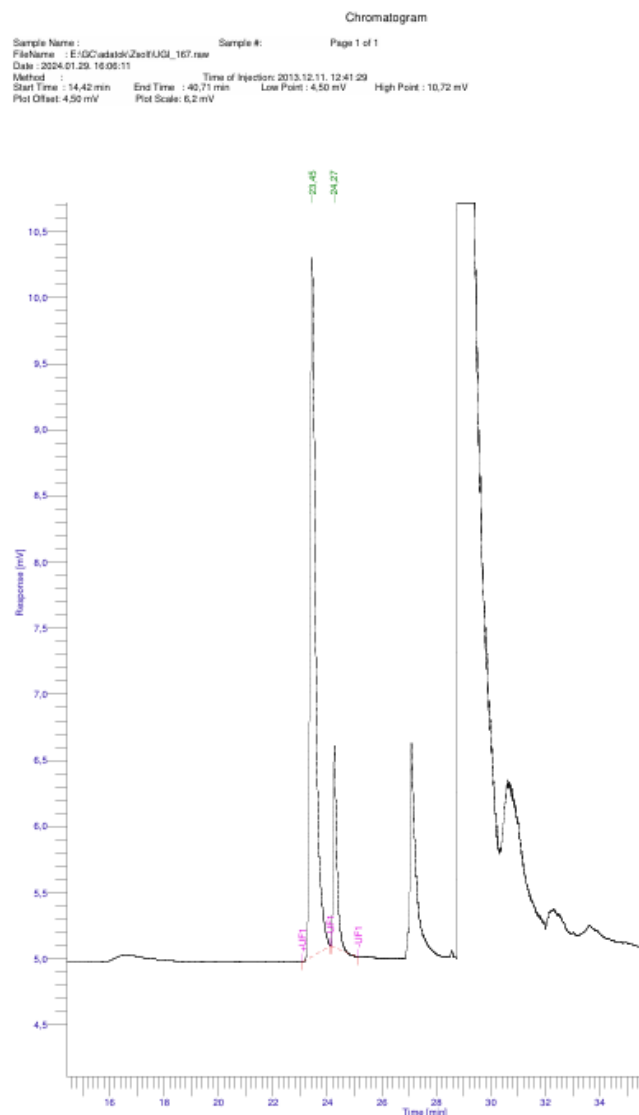

Software Version : 6.3.2.0646  
 Operator : manager  
 Sample Number :  
 AutoSampler : NONE  
 Instrument Name : PerkinName  
 Instrument Serial # : 610N9042106  
 Delay Time : 0.00 min  
 Sampling Rate : 12,5000 pts/s  
 Sample Volume : 1,000000 ul  
 Sample Amount : 1,0000  
 Data Acquisition Time : 2013.12.11. 12:41:29

Date : 2024.01.29. 16:06:30  
 Sample Name :  
 Study :  
 Rack/Vial : 0/0  
 Channel : A  
 A/D mV Range : 1000  
 End Time : 42,00 min

Area Reject : 0,000000  
 Dilution Factor : 1,00  
 Cycle : 1

Raw Data File : E:\GC\adatok\Zsolt\UGI\_167.raw  
 Result File : E:\GC\adatok\Zsolt\UGI\_167.rst [Editing in Progress]  
 Inst Method : D:\Doksik\Irodalom\GC\method\Zsolt\fenipropanol90 from E:\GC\adatok\Zsolt\UGI\_167.raw  
 Proc Method : D:\Doksik\Irodalom\GC\method\Zsolt\fenipropanol90 from E:\GC\adatok\Zsolt\UGI\_167.rst [Editing]  
 Calib Method : D:\Doksik\Irodalom\GC\method\Zsolt\fenipropanol90 from E:\GC\adatok\Zsolt\UGI\_167.rst [Editing]  
 Report Format File: D:\Doksik\Irodalom\GC\method\Zsolt\fenipropanol90.rpt  
 Sequence File : D:\Doksik\Irodalom\GC\adatok\UGI\_167.seq

## DEFAULT REPORT

| Peak # | Time [min] | Area [μV·s] | Height [μV] | Area [%] | Norm. Area [%] | BL  | Area/Height [s] |
|--------|------------|-------------|-------------|----------|----------------|-----|-----------------|
| 1      | 23,449     | 75748,25    | 5286,24     | 84,33    | 84,33          | *MM | 14,3293         |
| 2      | 24,272     | 14079,15    | 1525,55     | 15,67    | 15,67          | *MM | 9,2289          |
|        |            | 89827,39    | 6811,78     | 100,00   | 100,00         |     |                 |

Catalyst: **7a**

**Figure S 154: Chiral GC chromatogram of OAc 1-phenyl-1-propanol enantiomers**

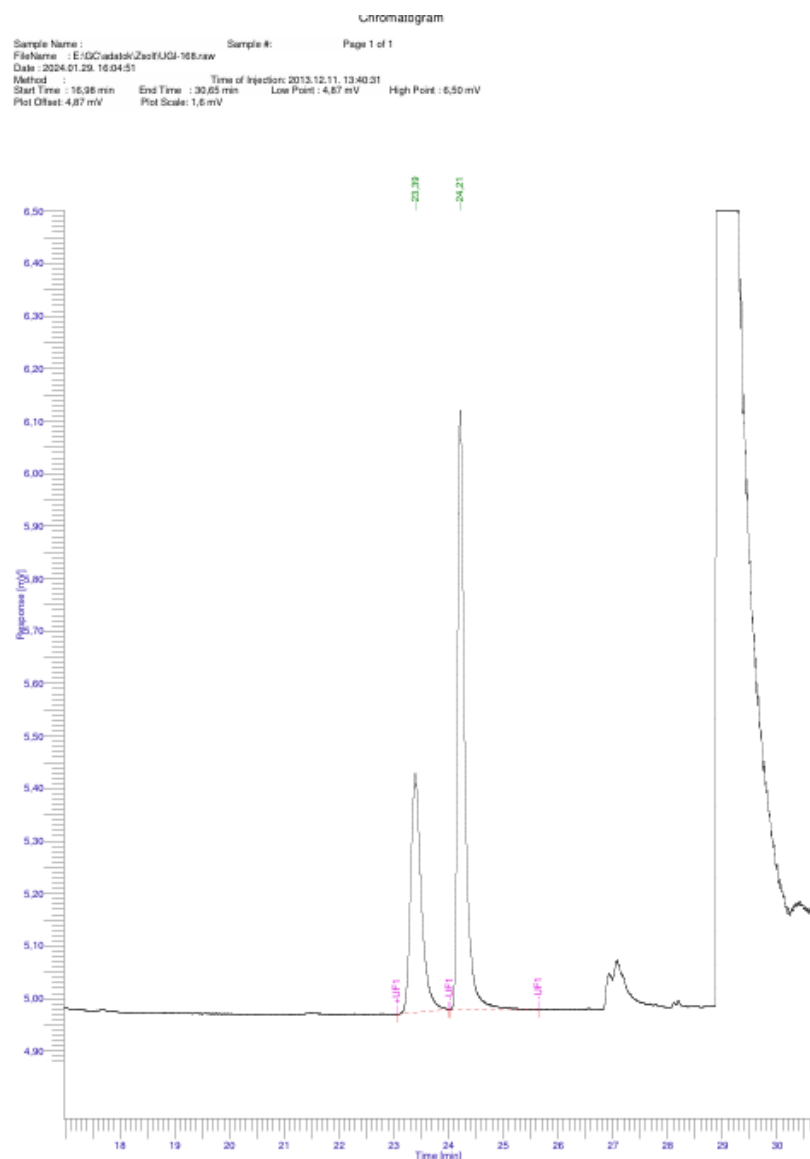

Software Version : 6.3.2.0646  
 Operator : manager  
 Sample Number :  
 AutoSampler : NONE  
 Instrument Name : PerkinName  
 Instrument Serial # : 610N9042106  
 Delay Time : 0.00 min  
 Sampling Rate : 12,5000 pts/s  
 Sample Volume : 1,000000 ul  
 Sample Amount : 1,0000  
 Data Acquisition Time : 2013.12.11. 13:40:31

Date : 2024.01.29. 16:05:24  
 Sample Name :  
 Study :  
 Rack/Vial : 0/0  
 Channel : A  
 A/D mV Range : 1000  
 End Time : 42,00 min

Area Reject : 0,000000  
 Dilution Factor : 1,00  
 Cycle : 1

Raw Data File : E:\GC\adatok\Zsolt\UGI-168.raw  
 Result File : E:\GC\adatok\Zsolt\UGI-168.rst [Editing in Progress]  
 Inst Method : D:\Doksik\Irodalom\GC\method\Zsolt\fenipropanol90 from E:\GC\adatok\Zsolt\UGI-168.raw  
 Proc Method : D:\Doksik\Irodalom\GC\method\Zsolt\fenipropanol90 from E:\GC\adatok\Zsolt\UGI-168.rst [Editing i  
 Calib Method : D:\Doksik\Irodalom\GC\method\Zsolt\fenipropanol90 from E:\GC\adatok\Zsolt\UGI-168.rst [Editing  
 Report Format File : D:\Doksik\Irodalom\GC\method\Zsolt\fenipropanol90.rpt  
 Sequence File : D:\Doksik\Irodalom\GC\adatok\UGI-168.seq

## DEFAULT REPORT

| Peak # | Time [min] | Area [μV·s] | Height [μV] | Area [%] | Norm. Area [%] | BL  | Area/Height [s] |
|--------|------------|-------------|-------------|----------|----------------|-----|-----------------|
| 1      | 23,393     | 6112,60     | 454,93      | 36,95    | 36,95          | *MM | 13,4365         |
| 2      | 24,211     | 10432,39    | 1142,32     | 63,05    | 63,05          | *MM | 9,1326          |
|        |            | 16544,99    | 1597,24     | 100,00   | 100,00         |     |                 |

Catalyst: **11a**



**Figure S 155: Chiral GC chromatogram of OAc 1-phenyl-1-propanol enantiomers**

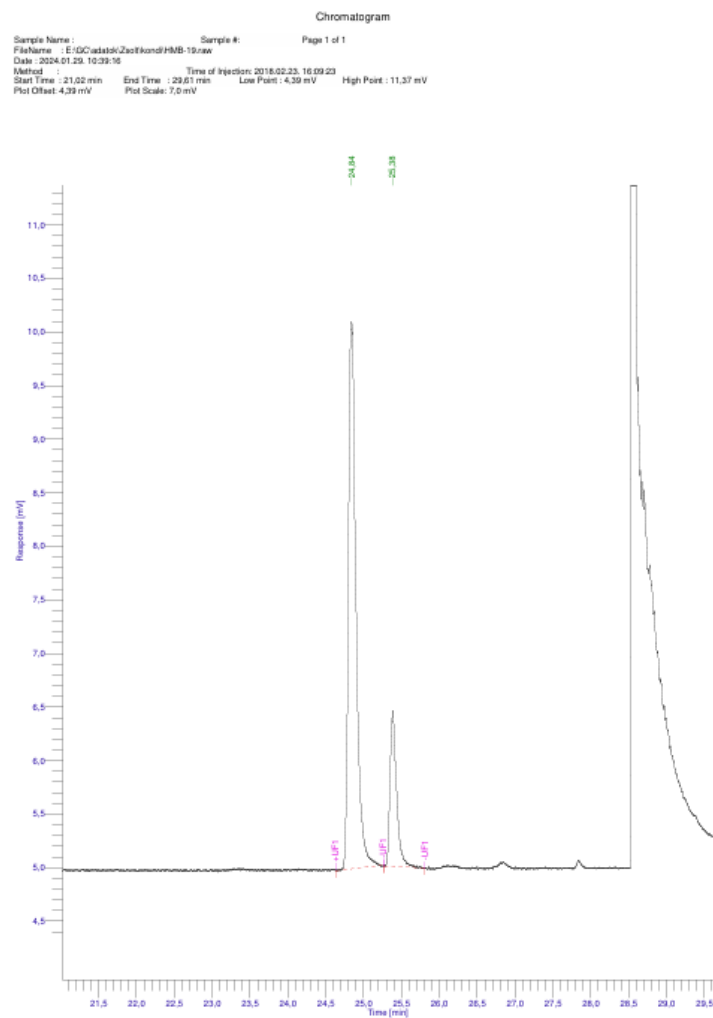

Software Version : 6.3.2.0646  
 Operator : manager  
 Sample Number :  
 AutoSampler : NONE  
 Instrument Name : AutosystemXL  
 Instrument Serial # : 610N9042106  
 Delay Time : 0.00 min  
 Sampling Rate : 12.5000 pts/s  
 Sample Volume : 1.000000 ul  
 Sample Amount : 1.0000  
 Data Acquisition Time : 2018.02.23. 16:09:23

Date : 2024.01.29. 10:39:39  
 Sample Name :  
 Study :  
 Rack/Vial : 0/0  
 Channel : A  
 A/D mV Range : 1000  
 End Time : 34.30 min

Area Reject : 0.000000  
 Dilution Factor : 1.00  
 Cycle : 1

Raw Data File : E:\GC\adatok\Zsolt\kondi\HMB-19.raw  
 Result File : E:\GC\adatok\Zsolt\kondi\HMB-19.rst [Editing in Progress]  
 Inst Method : E:\GC\method\Zsolt\fenipropanol90new from E:\GC\adatok\Zsolt\kondi\HMB-19.raw  
 Proc Method : E:\GC\method\Zsolt\fenipropanol90new from E:\GC\adatok\Zsolt\kondi\HMB-19.rst [Editing in Progress]  
 Calib Method : E:\GC\method\Zsolt\fenipropanol90new from E:\GC\adatok\Zsolt\kondi\HMB-19.rst [Editing in Progress]  
 Report Format File : E:\GC\method\Zsolt\fenipropanol90new.rpt  
 Sequence File : E:\GC\method\HMB-19.seq

## DEFAULT REPORT

| Peak # | Time [min] | Area [μV·s] | Height [μV] | Area [%] | Norm. Area [%] | BL  | Area/Height [s] |
|--------|------------|-------------|-------------|----------|----------------|-----|-----------------|
| 1      | 24.841     | 35360.30    | 5105.23     | 80.41    | 80.41          | *MM | 6.9263          |
| 2      | 25.381     | 8617.43     | 1456.08     | 19.59    | 19.59          | *MM | 5.9182          |
|        |            | 43977.73    | 6561.32     | 100.00   | 100.00         |     |                 |

Catalyst: **21b**

**Figure S 156: Chiral GC chromatogram of OAc 1-phenyl-1-propanol enantiomers**

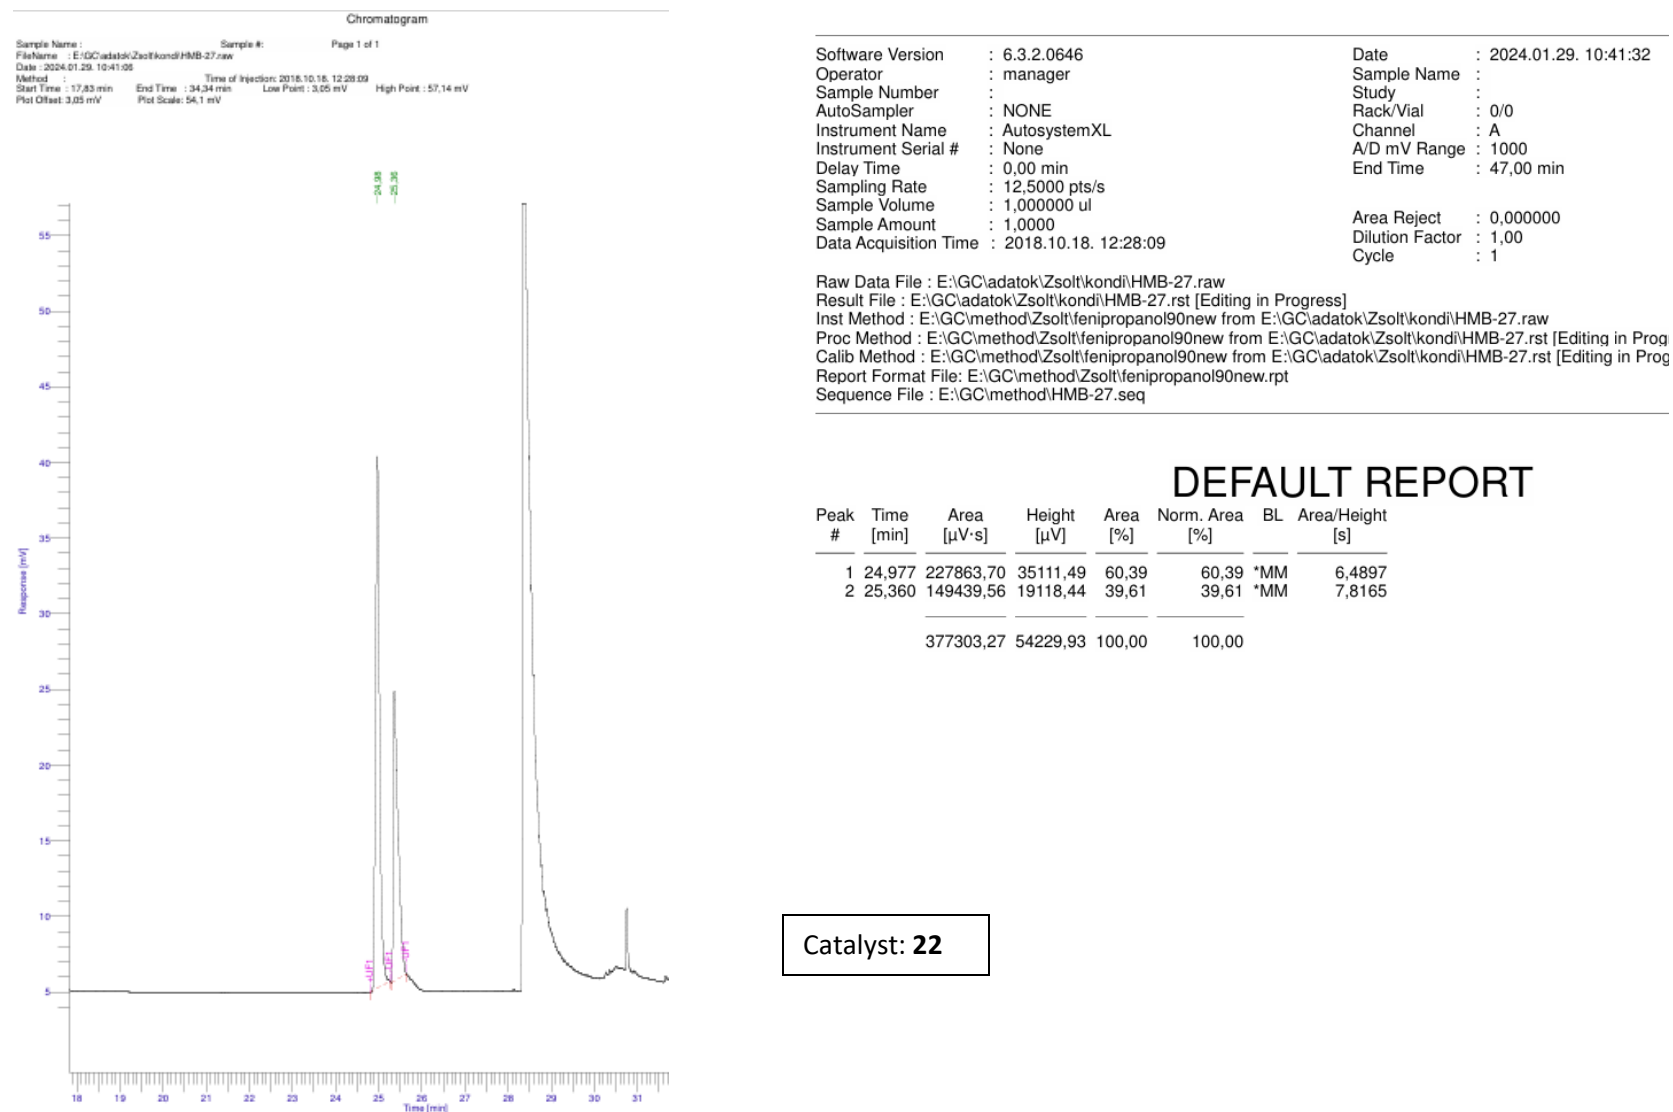

**Figure S 157: Chiral HPLC chromatogram of 1-(*p*-tolyl)-1-propanol enantiomers**

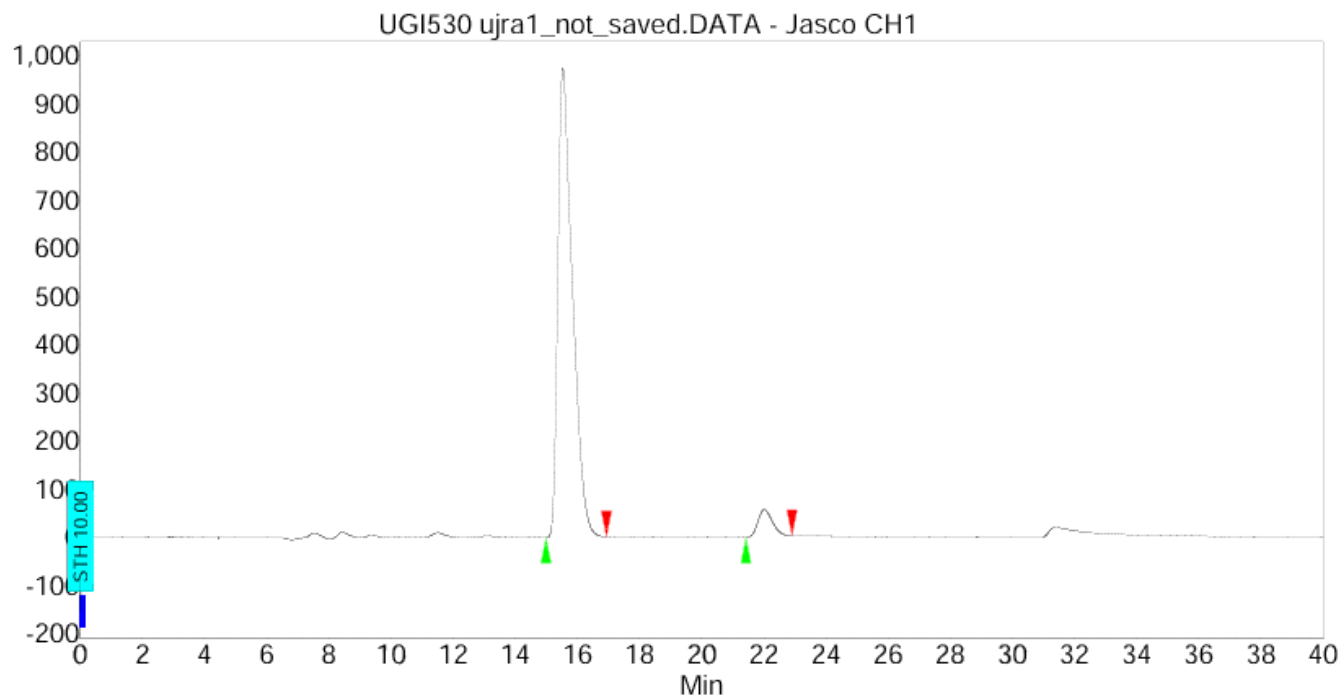

**Peak results :**

| Index | Name    | Time [Min] | Quantity [% Area] | Height [mV] | Area [mV.Min] | Area % [%] |
|-------|---------|------------|-------------------|-------------|---------------|------------|
| 1     | UNKNOWN | 15.532     | 94.51             | 973.6       | 529.3         | 94.510     |
| 2     | UNKNOWN | 22.017     | 5.49              | 56.7        | 30.7          | 5.490      |
|       |         |            |                   |             |               |            |
| Total |         |            | 100.00            | 1030.3      | 560.1         | 100.000    |

Catalyst: **7a**

Figure S 158: Chiral HPLC chromatogram of 1-(*p*-tolyl)-1-propanol enantiomers

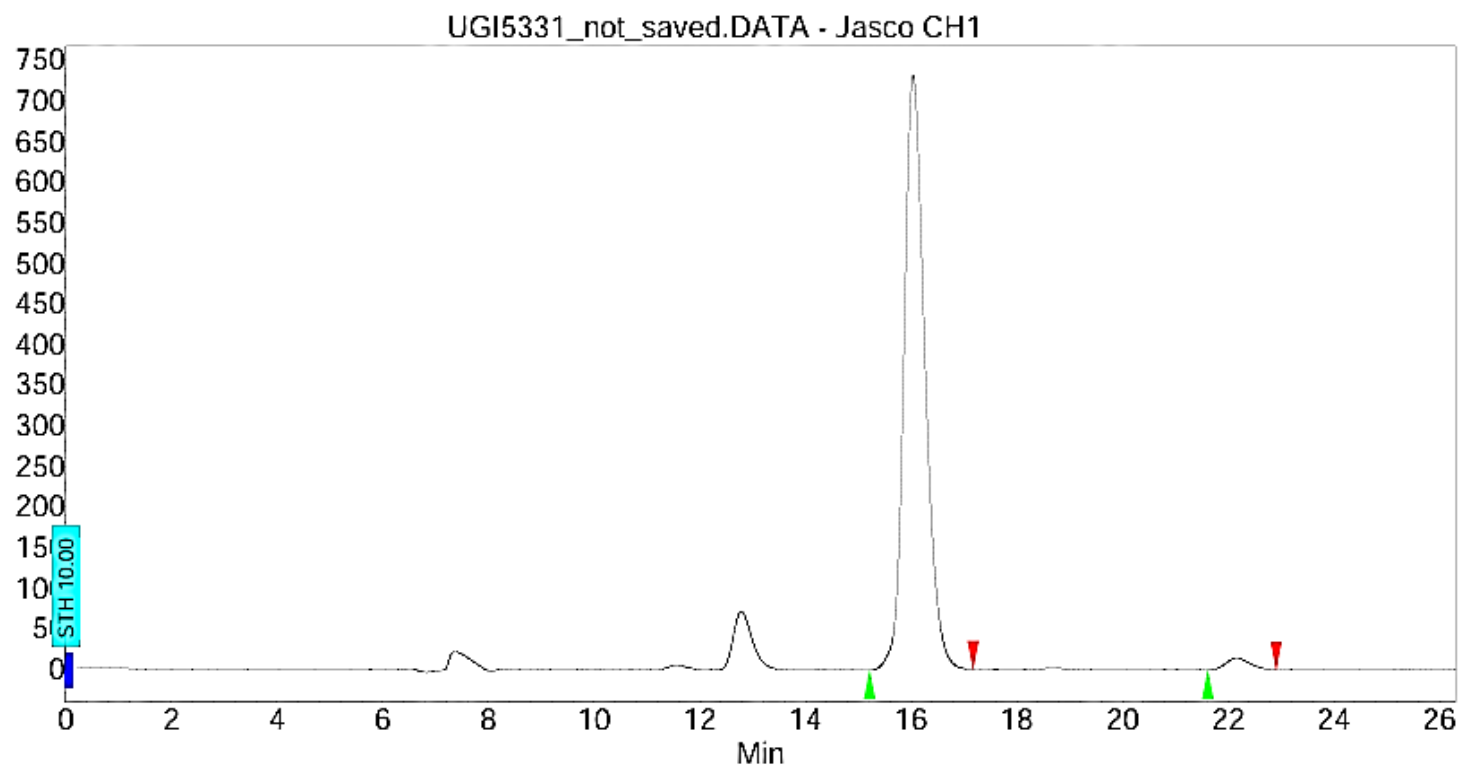

Peak results :

| Index | Name    | Time [Min] | Quantity [% Area] | Height [mV] | Area [mV.Min] | Area % [%] |
|-------|---------|------------|-------------------|-------------|---------------|------------|
| 1     | UNKNOWN | 16.037     | 97.77             | 731.5       | 336.2         | 97.771     |
| 2     | UNKNOWN | 22.163     | 2.23              | 14.3        | 7.7           | 2.229      |
| Total |         |            | 100.00            | 745.8       | 343.9         | 100.000    |

Catalyst: **10a**

**Figure S 159: Chiral HPLC chromatogram of 1-(*p*-methoxyphenyl)-1-propanol enantiomers**

**Chromatogram : UGI5311\_channel1**

System : PrepHPLC  
Method : UGI2  
User : User1

Acquired : 3/27/2024 1:05:09 PM  
Processed : 3/27/2024 1:41:45 PM  
Printed : 4/5/2024 12:17:44 PM

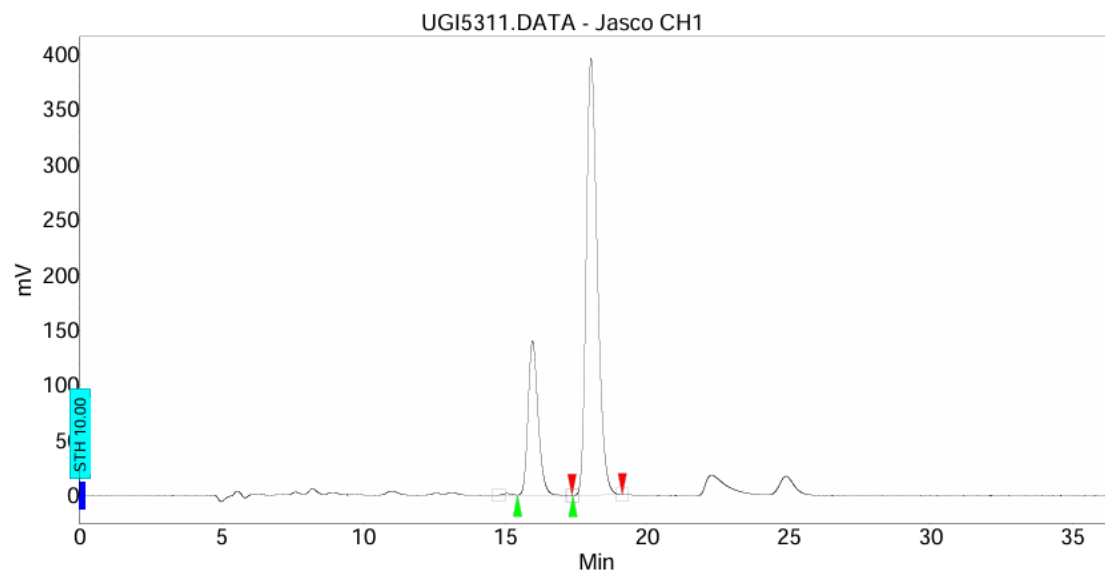

**Peak results :**

| Index | Name    | Time [Min] | Quantity [% Area] | Height [mV] | Area [mV.Min] | Area % [%] |
|-------|---------|------------|-------------------|-------------|---------------|------------|
| 1     | UNKNOWN | 15.953     | 24.07             | 139.6       | 56.8          | 24.066     |
| 2     | UNKNOWN | 18.017     | 75.93             | 395.3       | 179.3         | 75.934     |
| Total |         |            | 100.00            | 534.9       | 236.2         | 100.000    |

Catalyst: **7a**

**Figure S 160: Chiral HPLC chromatogram of 1-(*p*-methoxyphenyl)-1-propanol enantiomers**

**Chromatogram : UGI5341\_channel1**

System : PrepiHPLC  
Method : UGI2  
User : User1

Acquired : 4/3/2024 3:04:53 PM  
Processed : 4/4/2024 1:38:21 PM  
Printed : 4/5/2024 12:15:37 PM

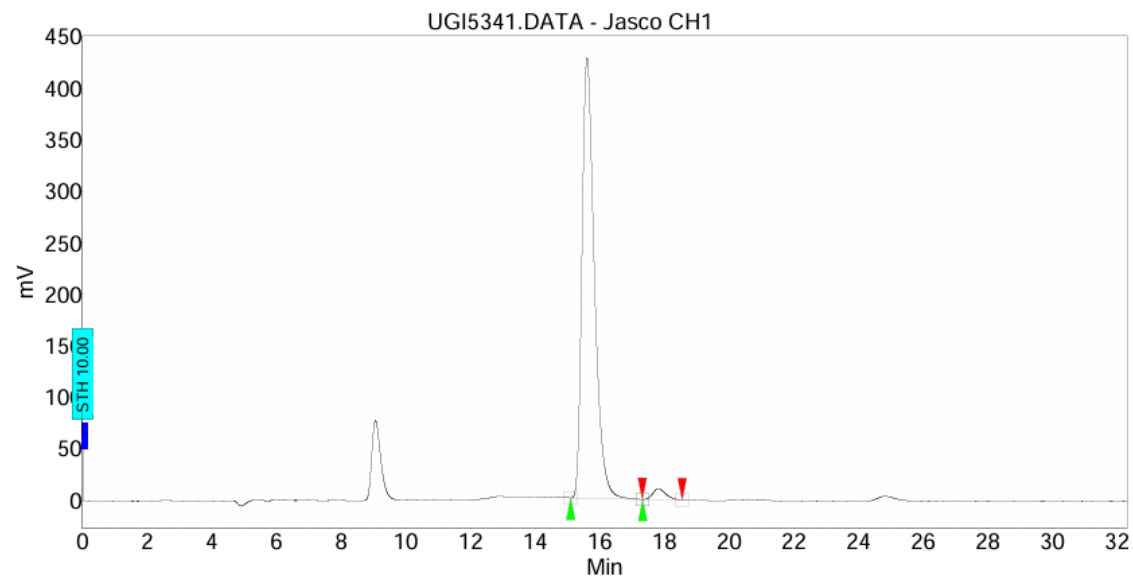

**Peak results :**

| Index | Name    | Time [Min] | Quantity [% Area] | Height [mV] | Area [mV.Min] | Area % [%] |
|-------|---------|------------|-------------------|-------------|---------------|------------|
| 1     | UNKNOWN | 15.607     | 97.51             | 427.2       | 189.8         | 97.505     |
| 2     | UNKNOWN | 17.817     | 2.49              | 10.5        | 4.9           | 2.495      |
| Total |         |            | 100.00            | 437.7       | 194.6         | 100.000    |

Catalyst: **10a**

Figure S 161: Chiral HPLC chromatogram of 1-(*m*-methoxyphenyl)-1-propanol enantiomers

Chromatogram : UGI5321\_channel1

System : PrepHPLC  
Method : UGI3  
User : User1

Acquired : 3/28/2024 10:30:59 AM  
Processed : 3/28/2024 11:55:55 AM  
Printed : 4/5/2024 12:23:20 PM

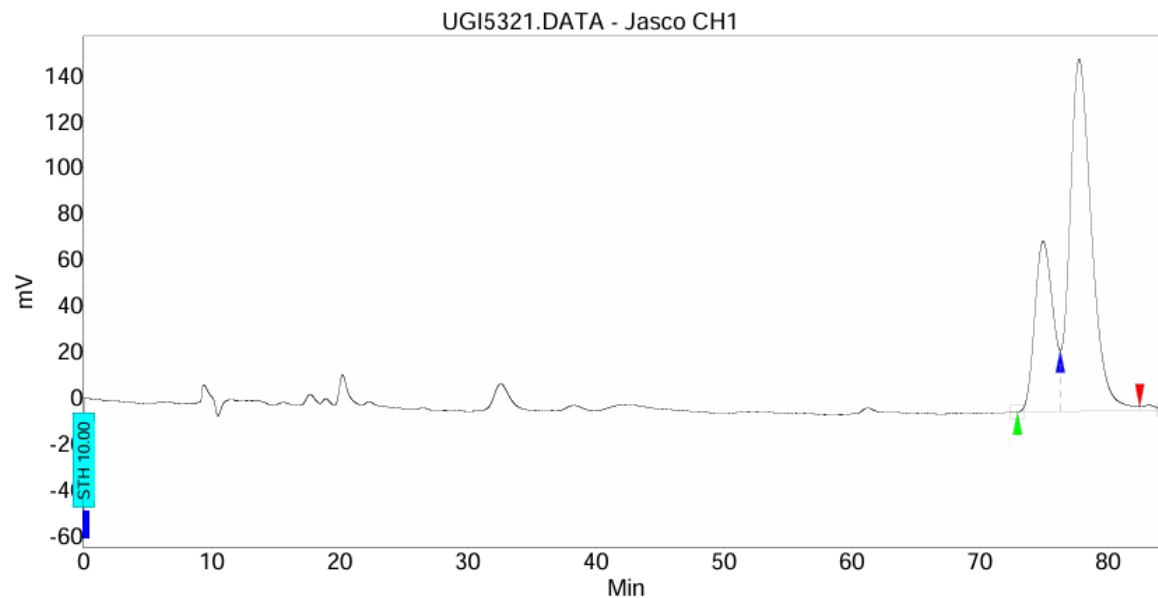

Peak results :

| Index | Name    | Time [Min] | Quantity [% Area] | Height [mV] | Area [mV.Min] | Area % [%] |
|-------|---------|------------|-------------------|-------------|---------------|------------|
| 1     | UNKNOWN | 74.943     | 28.83             | 74.0        | 122.5         | 28.830     |
| 2     | UNKNOWN | 77.752     | 71.17             | 152.7       | 302.3         | 71.170     |
| Total |         |            | 100.00            | 226.7       | 424.7         | 100.000    |

Catalyst: **7a**

Figure S 162: Chiral HPLC chromatogram of 1-(*m*-methoxyphenyl)-1-propanol enantiomers

## Chromatogram : UGI535 1\_channel1

System : PrepiHPLC  
Method : UGI3mod2  
User : User1

Acquired : 4/4/2024 4:25:40 PM  
Processed : 4/5/2024 4:58:35 PM  
Printed : 4/5/2024 5:07:32 PM

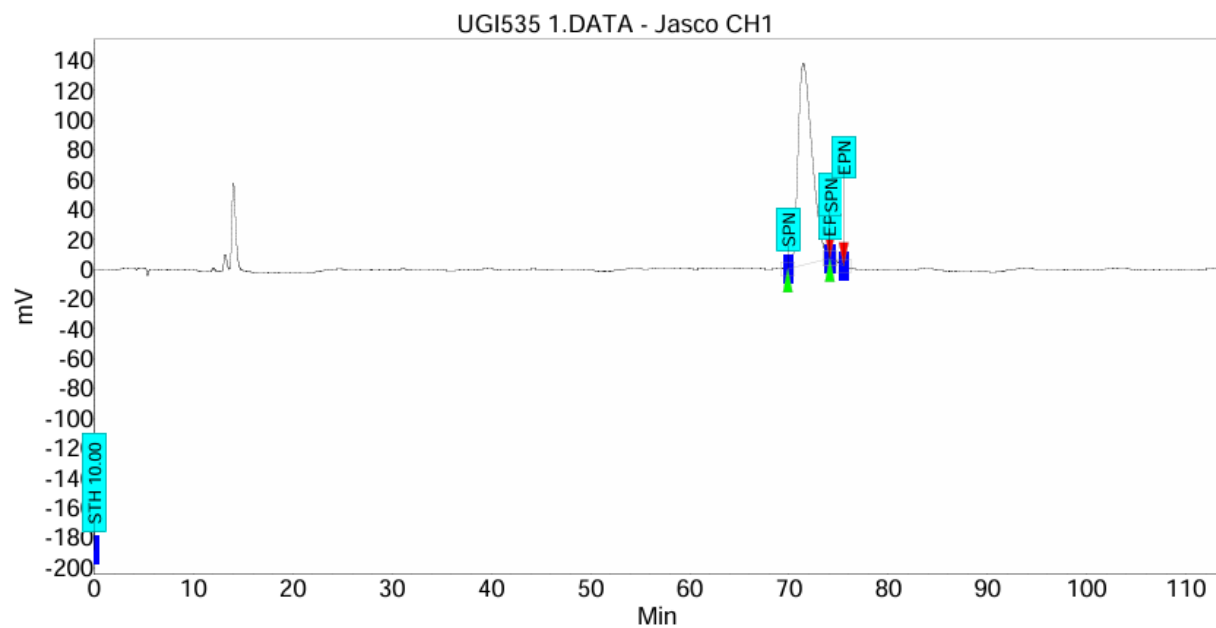

### Peak results :

| Index | Name    | Time [Min] | Quantity [% Area] | Height [mV] | Area [mV.Min] | Area % [%] |
|-------|---------|------------|-------------------|-------------|---------------|------------|
| 1     | UNKNOWN | 71.432     | 99.83             | 135.2       | 221.3         | 99.829     |
| 2     | UNKNOWN | 74.762     | 0.17              | 0.6         | 0.4           | 0.171      |
|       |         |            |                   |             |               |            |
| Total |         |            | 100.00            | 135.7       | 221.7         | 100.000    |

Catalyst: 10a
